# Supplementary material for: Targeting Multiple Homeostasis-Maintaining Systems by Ionophore Nigericin Is a Novel Approach for Senolysis
Source: MDPI journal article supplement (doi:10.3390/ijms232214251), 2022-11-17
Supplement: s1 [file s1]

# Targeting multiple homeostasis-maintaining systems by ionophore nigericin is a novel approach for senolysis

by Pavel I. Deryabin<sup>1</sup>, Alla N. Shatrova<sup>2</sup>, Aleksandra V. Borodkina<sup>1,\*</sup>

<sup>1</sup>Mechanisms of cellular senescence group, Institute of Cytology of the Russian Academy of Sciences, Tikhoretsky Ave. 4, 194064, Saint-Petersburg, Russia

<sup>2</sup>Laboratory of intracellular membranes dynamic, Institute of Cytology of the Russian Academy of Sciences, Tikhoretsky Ave. 4, 194064, Saint-Petersburg, Russia

\*Correspondence to Aleksandra V. Borodkina, Tikhoretsky ave. 4, 194064, St-Petersburg, Russia; [borodkina618@gmail.com](mailto:borodkina618@gmail.com)

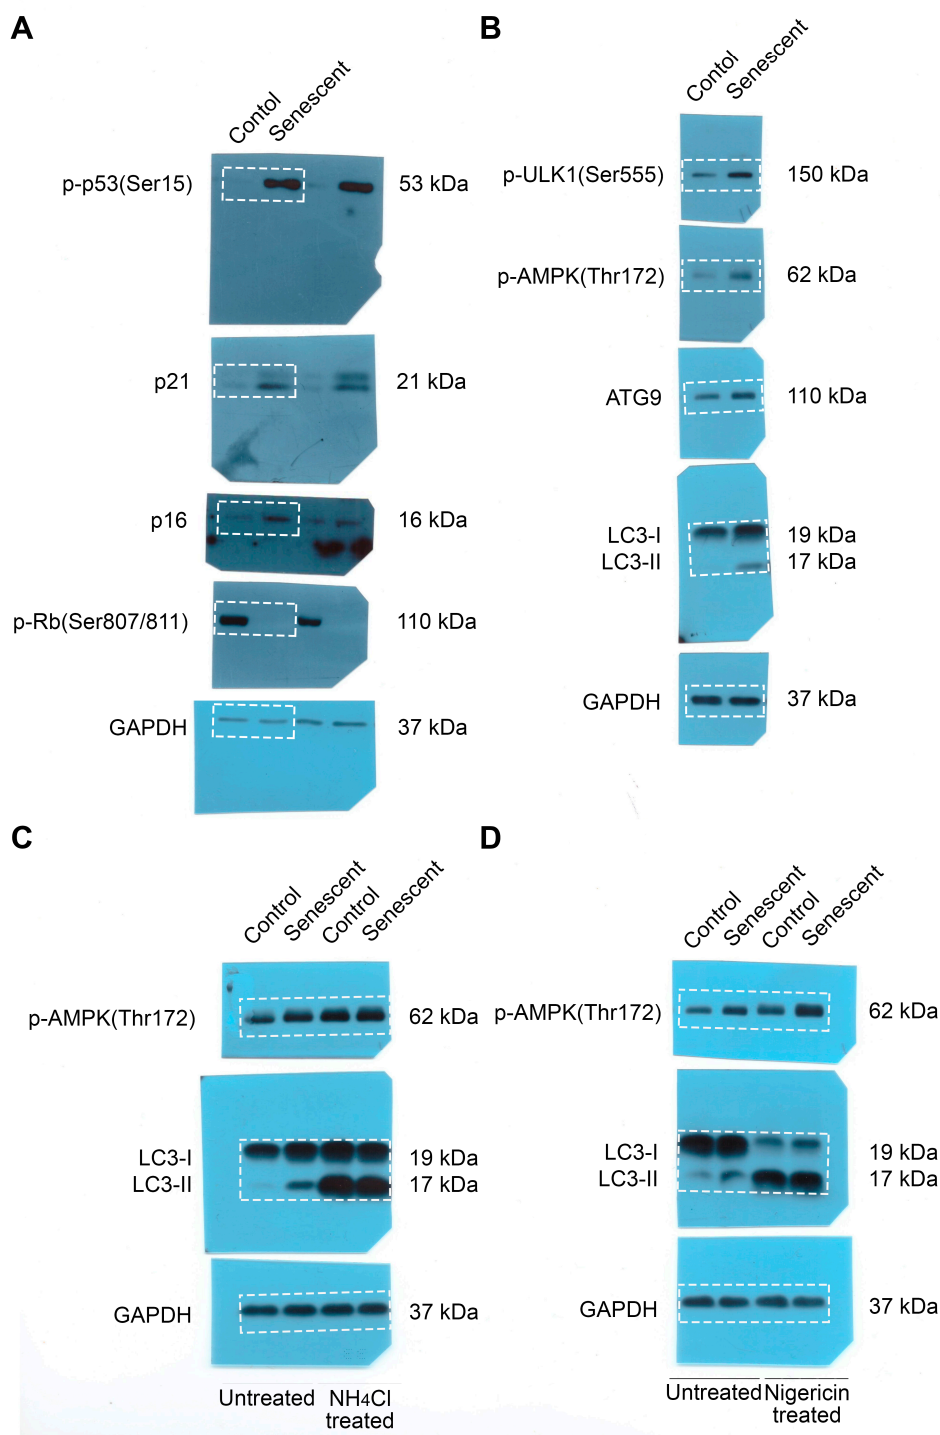

**Supplementary Figure S1.** Full-length blots presented in the article. (A) Blots for Figure 1B. (B) Blots for Figure 2H. (C) Blots for Figure 3H. (D) Blots for Figure 4E.
