# Supplementary material for: Targeting Multiple Homeostasis-Maintaining Systems by Ionophore Nigericin Is a Novel Approach for Senolysis
Source: Int J Mol Sci. 2022 Nov 17;23(22):14251. doi: 10.3390/ijms232214251 (PMC9693507; doi:10.3390/ijms232214251)
Supplement: Supplementary file 1 [file ijms-23-14251-s001.zip › Supplementary Table S1.csv]

Targeting multiple homeostasis-maintaining systems by ionophore nigericin is a novel approach for senolysis
by Pavel I. Deryabin1, Alla N. Shatrova2, Aleksandra V. Borodkina1,*
1Mechanisms of cellular senescence group, Institute of Cytology of the Russian Academy of Sciences, Tikhoretsky Ave. 4, 194064, Saint-Petersburg, Russia 2Laboratory of intracellular membranes dynamic, Institute of Cytology of the Russian Academy of Sciences, Tikhoretsky Ave. 4, 194064, Saint-Petersburg, Russia
*Correspondence to Aleksandra V. Borodkina, Tikhoretsky ave. 4, 194064, St-Petersburg, Russia; borodkina618@gmail.com
Supplementary Table 1. Results of differential gene expression estimation for senescent vs control END-MSCs comparison (Wald testing with LFC adaptive shrinkage estimator correction)
	baseMean	log2FoldChange	lfcSE	svalue	symbol	entrez	genename
ENSG00000133048.13	5355.11070690413	5.28239396742361	0.285109331798692	2.93805788898819e-61	CHI3L1	1116	chitinase 3 like 1
ENSG00000235385.2	610.618912228488	5.03548528622403	0.205662405250292	1.99440055424812e-102	LINC02154	109729169	long intergenic non-protein coding RNA 2154
ENSG00000094963.14	91.0892673560821	4.79613752737826	0.560161367596139	3.63361202352373e-15	FMO2	2327	flavin containing dimethylaniline monoxygenase 2
ENSG00000273763.2	29.3055805354523	4.44753930113654	1.41920831620238	0.000418999590608416	NA	NA	NA
ENSG00000251410.2	20.5072251565118	4.35731891399912	0.719086454715978	7.12702828874123e-09	NA	NA	NA
ENSG00000010932.17	52.4169856115228	4.21256661082508	0.659732764426322	1.82237734938682e-09	FMO1	2326	flavin containing dimethylaniline monoxygenase 1
ENSG00000198203.10	12.0645340037035	4.11989753511302	0.691171292092859	1.93379012918345e-08	SULT1C2	6819	sulfotransferase family 1C member 2
ENSG00000108688.11	75.6057272959103	4.07368478872996	0.357925176856329	1.48174115855624e-23	CCL7	6354	C-C motif chemokine ligand 7
ENSG00000230918.2	27.9267492081393	3.93261697758673	0.57409528907686	3.36081565477499e-10	DPP4-DT	100131604	DPP4 divergent transcript
ENSG00000135744.8	157.433502866608	3.86462031248937	0.444993789782277	1.33765919323346e-14	AGT	183	angiotensinogen
ENSG00000089127.13	76.3845207423558	3.74095495333223	0.402366450592146	3.95894019712209e-16	OAS1	4938	2'-5'-oligoadenylate synthetase 1
ENSG00000241104.5	393.349472869336	3.73980324508162	0.176296743273465	2.40607480036314e-70	LOC284344	284344	uncharacterized LOC284344
ENSG00000140479.17	39.5152072378777	3.49656942512129	0.491133888243168	2.17206958785584e-10	PCSK6	5046	proprotein convertase subtilisin/kexin type 6
ENSG00000108950.12	164.474779064237	3.48469703439367	0.291448587117689	3.56758436141353e-24	FAM20A	54757	FAM20A golgi associated secretory pathway pseudokinase
ENSG00000173826.14	14.2585708164248	3.47647834292316	0.693195421566614	1.73308570847781e-06	KCNH6	81033	potassium voltage-gated channel subfamily H member 6
ENSG00000143387.13	55175.1326392742	3.43845329781209	0.0783180402246667	1.38682674802079e-276	CTSK	1513	cathepsin K
ENSG00000138449.10	622.122989334507	3.41284942340519	0.174193099786489	2.62996290646976e-58	SLC40A1	30061	solute carrier family 40 member 1
ENSG00000087494.16	330.479320601718	3.40778600990087	0.166370917717102	2.7144856349086e-63	PTHLH	5744	parathyroid hormone like hormone
ENSG00000137507.11	78.4687512019474	3.28878774178459	0.44907643918222	1.13606695495707e-10	LRRC32	2615	leucine rich repeat containing 32
ENSG00000114805.17	95.5329250839584	3.23854888911056	0.389667459518933	7.26980006786972e-13	PLCH1	23007	phospholipase C eta 1
ENSG00000135218.19	1243.88695144258	3.20909017786245	0.234088428754606	1.26816383533766e-29	CD36	948	CD36 molecule
ENSG00000259673.6	34.2112591641653	3.19070660134699	0.48823497462428	4.68097451486713e-09	IQCH-AS1	100506686	IQCH antisense RNA 1
ENSG00000122176.12	1165.71896581584	3.18455047109672	0.110547916423559	4.25166470010318e-117	FMOD	2331	fibromodulin
ENSG00000004799.8	37.0976027503831	3.12496705391915	0.40399003178249	1.98663113228326e-11	PDK4	5166	pyruvate dehydrogenase kinase 4
ENSG00000110436.13	51.5438854179406	3.10071724898224	1.130852739535	0.00205157607732105	SLC1A2	6506	solute carrier family 1 member 2
ENSG00000231170.7	12.6509213201893	3.09097986815855	1.01268628095959	0.00108829203860622	NA	NA	NA
ENSG00000127951.7	105.684442556708	3.05682715699253	0.249968062756823	8.08082846141915e-24	FGL2	10875	fibrinogen like 2
ENSG00000118971.8	299.671664246973	3.03667987838679	0.159592403461369	3.32286926564904e-52	CCND2	894	cyclin D2
ENSG00000129682.16	13.6489932222176	3.0301543718798	0.617399489270722	4.59848549470464e-06	FGF13	2258	fibroblast growth factor 13
ENSG00000081479.15	104.296011104935	3.0038602883236	0.40048737445253	1.23666300338092e-10	LRP2	4036	LDL receptor related protein 2
ENSG00000196562.14	183.175422829714	3.00081439164002	0.404579594690406	2.02106837341467e-10	SULF2	55959	sulfatase 2
ENSG00000172663.9	18.9083541593413	2.99084696047771	0.92667633599404	0.000728896271549455	TMEM134	80194	transmembrane protein 134
ENSG00000184588.18	561.71011247337	2.94945396170144	0.130999122796791	5.04254041866093e-70	PDE4B	5142	phosphodiesterase 4B
ENSG00000185250.16	9.99398360601303	2.93449577204448	0.718668826549793	6.76089620888858e-05	PPIL6	285755	peptidylprolyl isomerase like 6
ENSG00000167772.12	27.1703639923119	2.9057514826861	0.604277939103902	6.89501725268742e-06	ANGPTL4	51129	angiopoietin like 4
ENSG00000241644.2	359.802636474568	2.89079761488656	0.169763137494554	1.47542226265793e-41	INMT	11185	indolethylamine N-methyltransferase
ENSG00000259172.1	44.5664724067599	2.82919435137829	0.339812784260643	4.98565090600465e-12	SNRPA1-DT	120766138	SNRPA1 divergent transcript
ENSG00000169710.9	61.9110235875653	2.82784925497122	2.72766248595027	0.049047206206456	FASN	2194	fatty acid synthase
ENSG00000179761.12	13.9790757993804	2.82606019458307	0.625643309081486	2.36651031829047e-05	PIPOX	51268	pipecolic acid and sarcosine oxidase
ENSG00000120708.17	2068.0224983581	2.79023102944996	0.112124837983781	2.83514249379878e-82	TGFBI	7045	transforming growth factor beta induced
ENSG00000227028.6	112.039323779696	2.78425495265833	0.365595126924361	1.59127777040774e-10	SLC8A1-AS1	100128590	SLC8A1 antisense RNA 1
ENSG00000250337.7	17.4801197643256	2.75300243542646	0.534300237206433	3.59057239667061e-06	PURPL	643401	p53 upregulated regulator of p53 levels
ENSG00000243176.6	32.4800876550818	2.73932795561698	0.328909884178135	7.31004451806646e-12	NA	NA	NA
ENSG00000197635.10	1144.38414780249	2.7094076146048	0.13852679739464	1.8628918846954e-51	DPP4	1803	dipeptidyl peptidase 4
ENSG00000182858.14	25.3923671015288	2.689695039364	0.726152006645252	0.000306640047595498	ALG12	79087	ALG12 alpha-1,6-mannosyltransferase
ENSG00000143847.15	9.68905918483082	2.6789890247571	0.820707367845768	0.000900909050456499	PPFIA4	8497	PTPRF interacting protein alpha 4
ENSG00000187954.12	11.1608769068055	2.65523161719896	0.792702169975749	0.000722119707630957	CYHR1	50626	cysteine and histidine rich 1
ENSG00000099953.10	80.5141145770349	2.65076949467289	0.322321972508207	1.58331563353964e-11	MMP11	4320	matrix metallopeptidase 11
ENSG00000176927.15	40.385511289033	2.64312483175269	0.870197464021053	0.00153245295356096	EFCAB5	374786	EF-hand calcium binding domain 5
ENSG00000018236.15	21.336395467352	2.62546077306687	0.501024420714467	3.49642841387496e-06	CNTN1	1272	contactin 1
ENSG00000170458.14	114.821049334672	2.62408526801622	0.782395156026244	0.000763051780229733	CD14	929	CD14 molecule
ENSG00000148344.11	185.585664680757	2.61233210486664	0.614401245474134	6.39276097254588e-05	PTGES	9536	prostaglandin E synthase
ENSG00000166762.18	14.6143493538821	2.5725846565226	0.622995535482879	0.00011015829072001	CATSPER2	117155	cation channel sperm associated 2
ENSG00000198829.6	68.0771886218989	2.57173921603953	0.281525444083208	2.36283395034069e-13	SUCNR1	56670	succinate receptor 1
ENSG00000212899.3	13.5262317693356	2.56769852964317	0.604604975880439	7.01545459547789e-05	KRTAP3-3	85293	keratin associated protein 3-3
ENSG00000108932.12	45.9703950702511	2.56089549434534	0.369395376402923	7.57737975709629e-09	SLC16A6	9120	solute carrier family 16 member 6
ENSG00000101670.12	50.2769464433216	2.51840588834129	0.337636735361856	1.11640571063778e-09	LIPG	9388	lipase G, endothelial type
ENSG00000109063.15	23.320249148481	2.51235824715035	0.522147892485036	1.54009746759089e-05	MYH3	4621	myosin heavy chain 3
ENSG00000159167.12	4228.89527220553	2.50676100084836	0.0724342536370038	1.31824514764182e-144	STC1	6781	stanniocalcin 1
ENSG00000116678.19	600.369569138224	2.49719402455521	0.149620341265772	1.27745769792309e-36	LEPR	3953	leptin receptor
ENSG00000169393.9	741.399332842517	2.48234495063578	0.151276898291602	1.61687323181426e-35	ELSPBP1	64100	epididymal sperm binding protein 1
ENSG00000130066.16	11752.4762127723	2.48079673558515	0.118322504392156	2.28059374887573e-55	SAT1	6303	spermidine/spermine N1-acetyltransferase 1
ENSG00000123612.16	12.2617938157784	2.47867308957671	0.58930778279962	0.000102334068121227	ACVR1C	130399	activin A receptor type 1C
ENSG00000111341.10	8910.53475920834	2.46809381338254	0.164423294368689	2.60881584574755e-30	MGP	4256	matrix Gla protein
ENSG00000124882.4	143.312779885459	2.45140333320489	0.204204164030759	9.88884186199128e-21	EREG	2069	epiregulin
ENSG00000106538.10	8.36515127123542	2.3970973655324	0.855909912851079	0.00283169257033896	RARRES2	5919	retinoic acid receptor responder 2
ENSG00000173947.14	28.0886203477653	2.39111361354754	0.543492698688093	6.2729249472602e-05	PIFO	128344	primary cilia formation
ENSG00000236671.9	239.083674984328	2.38654950008473	0.22816664219952	1.20444882235525e-15	NA	NA	NA
ENSG00000106483.12	13.8984704507215	2.368220088951	0.584970742898656	0.000194317160181605	SFRP4	6424	secreted frizzled related protein 4
ENSG00000184371.14	532.210835380978	2.3662344852854	0.245036806140356	5.23499996724774e-14	CSF1	1435	colony stimulating factor 1
ENSG00000223361.5	82.2249197144735	2.36027590022656	0.326665859170107	3.5741551198782e-09	FTH1P10	2502	ferritin heavy chain 1 pseudogene 10
ENSG00000146021.15	35.6397866957291	2.34154885391403	0.362126252836286	9.42493038702389e-08	KLHL3	26249	kelch like family member 3
ENSG00000175426.11	6.3594813014454	2.32098572896585	0.929496639725964	0.00570811100150504	PCSK1	5122	proprotein convertase subtilisin/kexin type 1
ENSG00000141469.18	135.859547991329	2.31927066806948	0.293733623703338	4.51804240185994e-10	SLC14A1	6563	solute carrier family 14 member 1 (Kidd blood group)
ENSG00000131738.11	127.191978836208	2.31845278767592	0.351733375033977	7.14574028445513e-08	KRT33B	3884	keratin 33B
ENSG00000205592.14	31.9203216964066	2.31364230944898	0.889104647313257	0.00486966830348085	MUC19	283463	mucin 19, oligomeric
ENSG00000180332.6	11.4770650951287	2.30705455009373	0.617079017882663	0.00042848516297083	KCTD4	386618	potassium channel tetramerization domain containing 4
ENSG00000242992.3	14.2804460977812	2.27992327444261	0.545586301101341	0.000164544905251711	NA	NA	NA
ENSG00000237264.4	12.9855643378268	2.27906749221694	0.571676616122074	0.000270947984166088	NA	NA	NA
ENSG00000227376.1	28.2369708019929	2.26381511051769	0.368611917216595	5.26925330558137e-07	NA	NA	NA
ENSG00000273674.5	9.18466511900636	2.25387156123886	0.715560394159215	0.00172442990050942	NA	NA	NA
ENSG00000229991.1	10.221292028928	2.24967000640525	0.647532222057512	0.000924036385268831	AKR1B1P1	401982	aldehyde reductase family 1 member B1 pseudogene 1
ENSG00000110203.9	219.076357094097	2.24246412513439	0.231280422454014	1.77170295282663e-13	FOLR3	2352	folate receptor gamma
ENSG00000078725.13	39.2706133255524	2.23101074944393	0.357588174093059	4.47799639407918e-07	BRINP1	1620	BMP/retinoic acid inducible neural specific 1
ENSG00000085117.12	68.8263273064938	2.20769680288632	0.958420844384418	0.00870375139972908	CD82	3732	CD82 molecule
ENSG00000100612.14	3542.31342113654	2.17464032711185	0.159142325257591	2.50299141349293e-23	DHRS7	51635	dehydrogenase/reductase 7
ENSG00000272196.2	96.1699623550885	2.17427850717858	0.450834081932262	3.86624105573036e-05	H2AC19	723790	H2A clustered histone 19
ENSG00000213658.11	8.67765000614673	2.16656057168099	0.789303654029677	0.00417409539494119	LAT	27040	linker for activation of T cells
ENSG00000234719.9	18.9224185829324	2.16640920101552	0.474868906678841	6.6372403740354e-05	NPIPB2	729978	nuclear pore complex interacting protein family member B2
ENSG00000188783.6	717.038780272944	2.13127811665935	0.113134286300384	1.26774174834018e-40	PRELP	5549	proline and arginine rich end leucine rich repeat protein
ENSG00000245532.9	4964.66489524943	2.13045587733828	0.124002356589941	1.75147515695435e-34	NEAT1	283131	nuclear paraspeckle assembly transcript 1
ENSG00000171360.3	25.5619610586696	2.12310649018077	0.439162331857262	4.27972263358708e-05	KRT38	8687	keratin 38
ENSG00000143127.13	22.361154665124	2.11469002969802	0.46705540362026	9.05088175600725e-05	ITGA10	8515	integrin subunit alpha 10
ENSG00000087245.13	2567.84183152785	2.10018501426917	0.170269994605748	2.28639136466216e-19	MMP2	4313	matrix metallopeptidase 2
ENSG00000259495.3	9.72676366866986	2.09575211950658	0.885520103962225	0.00854964492644361	NA	NA	NA
ENSG00000165105.10	6.59815930539978	2.09193940727065	0.992345192683735	0.0137718070108202	RASEF	158158	RAS and EF-hand domain containing
ENSG00000152527.14	238.983076236622	2.08671026518314	0.185396590047741	2.61999695596867e-16	PLEKHH2	130271	pleckstrin homology, MyTH4 and FERM domain containing H2
ENSG00000123700.5	14.8440724545759	2.08592689034888	0.561340822551155	0.000689174367392774	KCNJ2	3759	potassium inwardly rectifying channel subfamily J member 2
ENSG00000157601.14	429.83275440033	2.0805193792908	0.499977047339428	0.000267881757737483	MX1	4599	MX dynamin like GTPase 1
ENSG00000183111.12	15.3749813478724	2.07090121736719	0.530717580607562	0.000457489953935463	ARHGEF37	389337	Rho guanine nucleotide exchange factor 37
ENSG00000173535.14	22.6403227940768	2.06941538423655	0.500983788548417	0.000293280187761769	TNFRSF10C	8794	TNF receptor superfamily member 10c
ENSG00000105855.10	67.0303430555987	2.0569944970801	0.262440259643805	2.18651485594217e-09	ITGB8	3696	integrin subunit beta 8
ENSG00000266989.1	19.2997879869799	2.03534153479096	0.449219008910124	0.000119834060570339	NA	NA	NA
ENSG00000115380.20	12.6430289297157	2.03307641707522	0.700276355996588	0.00346224191269725	EFEMP1	2202	EGF containing fibulin extracellular matrix protein 1
ENSG00000117152.13	145.107147112162	2.02907116041605	0.181447551819497	1.54447032939749e-15	RGS4	5999	regulator of G protein signaling 4
ENSG00000266899.2	7.78139149699141	2.01198187737961	0.808623979919169	0.00762176979091223	NA	NA	NA
ENSG00000079931.15	2279.93507727539	2.00966253809399	0.0976019331544882	2.09649879202737e-45	MOXD1	26002	monooxygenase DBH like 1
ENSG00000285458.1	19.4371094408597	2.00713187069594	0.560216516320862	0.0011056507290318	C4orf36	132989	chromosome 4 open reading frame 36
ENSG00000172399.5	111.338081246978	1.9867268783278	0.20338734501337	2.43978330985087e-12	MYOZ2	51778	myozenin 2
ENSG00000154065.17	34.7777658589467	1.98614967765375	0.622660298548911	0.00217564917664898	ANKRD29	147463	ankyrin repeat domain 29
ENSG00000174080.11	49.733311637933	1.96317576196431	0.290529006038796	2.36679703131154e-07	CTSF	8722	cathepsin F
ENSG00000085662.14	28479.2418454503	1.96136223945763	0.178900720534763	8.43302036474995e-15	AKR1B1	231	aldo-keto reductase family 1 member B
ENSG00000286811.1	9.77415525769919	1.9544073369427	0.695805986027007	0.00489549206333031	NA	NA	NA
ENSG00000120875.9	16.9823002086536	1.94152566748131	0.466704045785713	0.000361681734923005	DUSP4	1846	dual specificity phosphatase 4
ENSG00000054690.14	7.38310994405403	1.92901794584125	0.808804065008669	0.00977909224517709	PLEKHH1	57475	pleckstrin homology, MyTH4 and FERM domain containing H1
ENSG00000251249.2	22.7191079374868	1.92483495371523	0.495591482787784	0.000663491009959694	LOC100505685	100505685	uncharacterized LOC100505685
ENSG00000172000.7	94.5708463364276	1.91503741989031	0.262078336921309	4.55518511906717e-08	ZNF556	80032	zinc finger protein 556
ENSG00000176046.8	199.522186652836	1.9076678431294	0.8282950047789	0.0118728798690949	NUPR1	26471	nuclear protein 1, transcriptional regulator
ENSG00000134775.15	18.5093231200894	1.90761975104457	0.636879261926858	0.00352893685176246	FHOD3	80206	formin homology 2 domain containing 3
ENSG00000117598.13	7.26516754680217	1.90424618790604	1.48259771013511	0.0454728590321928	PLPPR5	163404	phospholipid phosphatase related 5
ENSG00000130513.6	200.732147737177	1.90393583032838	0.190513644091071	2.2489429735103e-12	GDF15	9518	growth differentiation factor 15
ENSG00000126709.15	262.465709563824	1.89240185318264	0.183470617932031	4.76706577347784e-13	IFI6	2537	interferon alpha inducible protein 6
ENSG00000266256.3	94.2656745745688	1.89207319792712	0.479349679713477	0.00062604591081307	LINC00908	284276	long intergenic non-protein coding RNA 908
ENSG00000138131.4	643.135918879951	1.88725749714946	0.124450927152682	4.25172129209087e-25	LOXL4	84171	lysyl oxidase like 4
ENSG00000219507.4	23.8173318457579	1.88485317954103	0.489577316328515	0.000784209932556862	NA	NA	NA
ENSG00000171408.14	22.458066003584	1.88448053362639	0.416034350940915	0.000184705830703039	PDE7B	27115	phosphodiesterase 7B
ENSG00000088836.14	15.8209751309482	1.87959302649412	1.09756689759614	0.0271847644362213	SLC4A11	83959	solute carrier family 4 member 11
ENSG00000048052.21	130.686146087257	1.86801205277203	0.232185974692127	4.30814228772468e-09	HDAC9	9734	histone deacetylase 9
ENSG00000104763.19	3678.25428544594	1.86024683396173	0.0872518580674626	8.39319432074411e-45	ASAH1	427	N-acylsphingosine amidohydrolase 1
ENSG00000135929.9	60.8235492239221	1.85325407588915	0.524642162774386	0.00158986387056122	CYP27A1	1593	cytochrome P450 family 27 subfamily A member 1
ENSG00000180447.7	354.294036488826	1.85168110827346	0.165358725751279	1.5462343770545e-14	GAS1	2619	growth arrest specific 1
ENSG00000229951.5	43.5632317662845	1.84710653566377	0.337357149958624	1.73734791110223e-05	FLJ31356	403150	uncharacterized protein FLJ31356
ENSG00000116741.8	1674.87229160699	1.84353329551415	0.0876466708268587	2.02945125211319e-43	RGS2	5997	regulator of G protein signaling 2
ENSG00000121769.8	245.045064932991	1.84140020002377	0.191144717576619	1.74705186997543e-11	FABP3	2170	fatty acid binding protein 3
ENSG00000287642.1	13.0228915037983	1.84050291922685	0.583309315323517	0.00291045987566562	LOC729870	729870	uncharacterized LOC729870
ENSG00000180596.7	58.1761855034821	1.83934925943222	0.312889181592353	5.38262668124725e-06	H2BC4	8347	H2B clustered histone 4
ENSG00000171817.17	19.280678176091	1.8382093944487	0.701461687451514	0.00737430778954783	ZNF540	163255	zinc finger protein 540
ENSG00000244219.7	62.1632046849235	1.83570008747793	0.282236974716438	1.19377886888041e-06	TMEM225B	100289187	transmembrane protein 225B
ENSG00000160808.11	101.828942797559	1.83362533462292	0.342205397638953	2.88161884262133e-05	MYL3	4634	myosin light chain 3
ENSG00000152154.11	10.8383459505579	1.83042410604315	0.603800698449527	0.00375344462597116	TMEM178A	130733	transmembrane protein 178A
ENSG00000165757.9	269.938127299144	1.83017610782388	0.157552720526157	3.16092328212155e-15	JCAD	57608	junctional cadherin 5 associated
ENSG00000125148.7	1370.02183007677	1.82533162150041	0.145028220536112	2.40230530518884e-17	MT2A	4502	metallothionein 2A
ENSG00000237913.1	9.02536590233759	1.82456857644706	0.666331705200346	0.00622417372127397	FTLP19	100873960	ferritin light chain pseudogene 19
ENSG00000134363.12	28.1108313248304	1.82241603588066	0.432334856273206	0.000400359527170771	FST	10468	follistatin
ENSG00000099219.14	1034.18285788884	1.81411821356202	0.104819286251979	5.48097316234262e-30	ERMP1	79956	endoplasmic reticulum metallopeptidase 1
ENSG00000260912.1	78.6244860835963	1.81303897002135	0.222165806138828	5.44964351330797e-09	NA	NA	NA
ENSG00000148082.10	802.712774581691	1.81165401901847	0.2058311571564	6.53504867600343e-10	SHC3	53358	SHC adaptor protein 3
ENSG00000272674.3	16.7270506186502	1.81074306251361	0.488652484865822	0.00129209853176998	PCDHB16	57717	protocadherin beta 16
ENSG00000100100.13	124.75249813957	1.80618661604403	0.190514403381151	5.31465975124404e-11	PIK3IP1	113791	phosphoinositide-3-kinase interacting protein 1
ENSG00000187837.3	613.943908538722	1.80486477045956	0.173697846329665	1.07309951773237e-12	H1-2	3006	H1.2 linker histone, cluster member
ENSG00000277778.2	21.4889523957976	1.80135007514187	0.456748157347465	0.000805553711989394	PGM5P2	595135	phosphoglucomutase 5 pseudogene 2
ENSG00000183696.14	147.214704766964	1.80108960866032	0.34211236639239	4.3526138865987e-05	UPP1	7378	uridine phosphorylase 1
ENSG00000158258.16	170.121272469406	1.79449175594971	0.188363480763185	4.87965394779329e-11	CLSTN2	64084	calsyntenin 2
ENSG00000286369.1	12.7787365096036	1.7939641521168	0.57199835286556	0.00320205277219294	NA	NA	NA
ENSG00000115165.10	45.7297473791403	1.7901000675451	0.381975998757631	0.000173207555980262	CYTIP	9595	cytohesin 1 interacting protein
ENSG00000077942.19	4569.90861519151	1.78611723737555	0.0909802085116375	3.94975318015979e-37	FBLN1	2192	fibulin 1
ENSG00000173846.13	50.3363512532404	1.78499668421133	0.506626208018797	0.00178988875335109	PLK3	1263	polo like kinase 3
ENSG00000172215.6	15.1423613259316	1.78494302650509	0.534547064063606	0.00229308051130641	CXCR6	10663	C-X-C motif chemokine receptor 6
ENSG00000167996.16	18482.0532732671	1.7823010400798	0.131391901148415	8.74390564106375e-20	FTH1	2495	ferritin heavy chain 1
ENSG00000073605.18	34.6683373397266	1.7815846024531	0.404099225333441	0.00033128669635125	GSDMB	55876	gasdermin B
ENSG00000143341.12	163.283558888599	1.78055022967074	0.368965535369456	0.000140292064254688	HMCN1	83872	hemicentin 1
ENSG00000170385.10	153.563090664443	1.77418680464526	0.190679346740315	1.46205400383684e-10	SLC30A1	7779	solute carrier family 30 member 1
ENSG00000148219.16	169.331381899062	1.75255255412142	0.186394337861628	1.34366133708382e-10	ASTN2	23245	astrotactin 2
ENSG00000175040.6	175.898101145151	1.7509890718288	0.173510814431393	8.80633253470426e-12	CHST2	9435	carbohydrate sulfotransferase 2
ENSG00000129467.13	63.1237257931843	1.74118468397853	0.521835174592925	0.00240057289532904	ADCY4	196883	adenylate cyclase 4
ENSG00000161265.15	94.4787238649204	1.73942083040228	0.390151039221715	0.000338703724739783	U2AF1L4	199746	U2 small nuclear RNA auxiliary factor 1 like 4
ENSG00000138675.16	466.702005763259	1.73408807767554	0.353426451217992	0.0001385291154211	FGF5	2250	fibroblast growth factor 5
ENSG00000170160.17	35.1997980454606	1.73308520093829	0.52249475185711	0.00267751613298691	CCDC144A	9720	coiled-coil domain containing 144A
ENSG00000247095.3	8.7382501438116	1.72884007940975	0.770166869405573	0.0157252550014463	MIR210HG	100506211	MIR210 host gene
ENSG00000163328.13	186.90388362469	1.72764723776098	0.167760060917544	5.53821822923892e-12	GPR155	151556	G protein-coupled receptor 155
ENSG00000253837.1	15.8840659082256	1.72601358634982	0.614966701005624	0.00664071560305947	LOC100507156	100507156	uncharacterized LOC100507156
ENSG00000100600.15	258.289470601214	1.72426199932149	0.398197253150988	0.000433275826716532	LGMN	5641	legumain
ENSG00000244627.5	15.6469573889668	1.72038486543609	0.525220556138686	0.00297036770510071	NA	NA	NA
ENSG00000254860.6	8.50544196025891	1.71702622319233	0.942256463175277	0.0264781683042524	TMEM9B-AS1	493900	TMEM9B antisense RNA 1
ENSG00000181754.7	103.849776018332	1.715315570387	0.212166973410995	2.35265611607146e-08	AMIGO1	57463	adhesion molecule with Ig like domain 1
ENSG00000121039.10	770.488005255533	1.71243481895296	0.113763897387651	1.74318972345525e-22	RDH10	157506	retinol dehydrogenase 10
ENSG00000276007.1	46.9240584970084	1.71187471447856	0.345702059196389	0.00013676871721588	NA	NA	NA
ENSG00000168874.13	16.7919745472058	1.70703462044315	0.510370718706099	0.00269639761202215	ATOH8	84913	atonal bHLH transcription factor 8
ENSG00000112096.18	7794.4892844518	1.70176777697013	0.19125679947202	1.69736239027792e-09	SOD2	6648	superoxide dismutase 2
ENSG00000133422.13	38.3867547772369	1.70153264274644	0.527772249832508	0.00341787306959437	MORC2	22880	MORC family CW-type zinc finger 2
ENSG00000186409.17	27.2441512511562	1.69873612879361	0.567836258228506	0.00537023173998574	CCDC30	728621	coiled-coil domain containing 30
ENSG00000287725.1	18.4791660472737	1.69853156826491	0.456851480042577	0.0016132209514401	NA	NA	NA
ENSG00000234975.6	10.8350917152931	1.69624619550069	0.653949453326146	0.00953268849611255	FTH1P2	2497	ferritin heavy chain 1 pseudogene 2
ENSG00000180573.9	474.851175596181	1.68760582273635	0.12321239844546	6.6420931592623e-19	H2AC6	8334	H2A clustered histone 6
ENSG00000149968.12	21141.8193402239	1.68251937280137	0.0671291418819129	5.1384874592126e-54	MMP3	4314	matrix metallopeptidase 3
ENSG00000136235.16	5711.97240069576	1.68131106736237	0.0969641965045345	5.36251876494879e-28	GPNMB	10457	glycoprotein nmb
ENSG00000197479.7	12.9124246399257	1.68111937172583	0.553682329034928	0.0051815123009676	PCDHB11	56125	protocadherin beta 11
ENSG00000279289.1	31.8155472218422	1.68111348750396	0.384600324953249	0.000472380555026423	NA	NA	NA
ENSG00000169605.6	48.3132593089772	1.67715410725057	0.272025785962038	6.69158476311234e-06	GKN1	56287	gastrokine 1
ENSG00000182993.5	98.8233785997567	1.67705195416179	0.222147128990558	1.42381078376239e-07	C12orf60	144608	chromosome 12 open reading frame 60
ENSG00000103811.16	92.1291515166204	1.67337630250342	0.364592709817332	0.000327675495804686	CTSH	1512	cathepsin H
ENSG00000136859.10	1392.61203076979	1.67016863460711	0.086895875335107	3.42602169322431e-33	ANGPTL2	23452	angiopoietin like 2
ENSG00000223953.6	13.7814098482515	1.66992985277716	0.53767554614239	0.00469229676398763	C1QTNF5	114902	C1q and TNF related 5
ENSG00000196605.7	41.5755634100167	1.66934342961571	0.372432003296159	0.000382586413391125	ZNF846	162993	zinc finger protein 846
ENSG00000167202.11	59.6895840564696	1.66792378002754	0.280253190560135	1.32494044847209e-05	TBC1D2B	23102	TBC1 domain family member 2B
ENSG00000239887.6	15.2707360529908	1.66657266852074	0.550246238506849	0.00542462754794782	C1orf226	400793	chromosome 1 open reading frame 226
ENSG00000137809.17	430.097275692788	1.66492536596074	0.110954435967981	1.06913467584335e-21	ITGA11	22801	integrin subunit alpha 11
ENSG00000003137.8	243.72377605999	1.66426043055929	0.269452475001679	7.30356217267495e-06	CYP26B1	56603	cytochrome P450 family 26 subfamily B member 1
ENSG00000274253.5	11.2478470928416	1.66325714476722	0.592655302177878	0.00733902366611357	LOC283683	283683	uncharacterized LOC283683
ENSG00000197872.11	13.121156799321	1.66314812888361	0.558915116011455	0.00567873264263277	CYRIA	81553	CYFIP related Rac1 interactor A
ENSG00000108691.9	4443.95532780035	1.66133041545391	0.126236169480375	4.01539936195723e-17	CCL2	6347	C-C motif chemokine ligand 2
ENSG00000163956.13	346.085931393593	1.66085441862897	0.681312884379896	0.0129187029340686	LRPAP1	4043	LDL receptor related protein associated protein 1
ENSG00000116711.10	37.1022501037911	1.6570407723615	0.316992241206022	8.07616851465529e-05	PLA2G4A	5321	phospholipase A2 group IVA
ENSG00000135116.9	59.9059078149443	1.6561207609277	0.269517886492831	8.79567986107273e-06	HRK	8739	harakiri, BCL2 interacting protein
ENSG00000261773.1	7.15077876364285	1.65457745123909	0.747200229108891	0.0176953994418531	NA	NA	NA
ENSG00000233005.2	22.0750303504369	1.65417887157044	0.433767382040791	0.00150978198297216	NA	NA	NA
ENSG00000259577.2	9.72186576461606	1.65378175159661	0.669119835124177	0.012548563510857	NA	NA	NA
ENSG00000256040.2	418.794922715356	1.65369667838021	0.132730484016736	2.39347055559119e-15	PAPPA-AS1	493913	PAPPA antisense RNA 1
ENSG00000143839.15	1271.09420641381	1.65240172845793	0.216019634691828	1.35328101600238e-07	REN	5972	renin
ENSG00000139508.14	99.7709917665208	1.651988321729	0.198632660828942	2.13240443891739e-08	SLC46A3	283537	solute carrier family 46 member 3
ENSG00000100968.14	91.1663328877379	1.65192279134946	0.200802814169829	2.72676806266149e-08	NFATC4	4776	nuclear factor of activated T cells 4
ENSG00000070731.11	15.8145318789696	1.65010806413477	0.547577431704011	0.00559246870744234	ST6GALNAC2	10610	ST6 N-acetylgalactosaminide alpha-2,6-sialyltransferase 2
ENSG00000047346.12	356.105555968873	1.64615363074841	0.243869149878552	2.25800610167894e-06	FAM214A	56204	family with sequence similarity 214 member A
ENSG00000131386.19	1569.07168439943	1.64204436176649	0.100802570040472	1.97070119070816e-24	GALNT15	117248	polypeptide N-acetylgalactosaminyltransferase 15
ENSG00000111364.16	85.9445686045572	1.64078357325789	0.335865661000412	0.00020898477280665	DDX55	57696	DEAD-box helicase 55
ENSG00000162913.10	20.1303970577273	1.64045235788553	0.566527906073672	0.0067375217407815	OBSCN-AS1	574407	OBSCN antisense RNA 1
ENSG00000123154.12	12.2566676652158	1.6401730775936	0.986086918929682	0.0337777692819239	WDR83	84292	WD repeat domain 83
ENSG00000163050.17	12.8617245083559	1.63752102128818	0.592427386445318	0.00802176139791685	COQ8A	56997	coenzyme Q8A
ENSG00000175356.13	79.4727549751838	1.63535314746095	0.527567263878096	0.00515494128423403	SCUBE2	57758	signal peptide, CUB domain and EGF like domain containing 2
ENSG00000257556.2	7.26762759459761	1.62983488758954	1.05075560795633	0.0384699335448493	NA	NA	NA
ENSG00000244242.2	9.99044273898	1.62938197750933	0.699277405799528	0.015828227576677	IFITM10	402778	interferon induced transmembrane protein 10
ENSG00000104870.13	66.2196510535405	1.62550252611929	0.315149196787124	0.000124795020543696	FCGRT	2217	Fc fragment of IgG receptor and transporter
ENSG00000279656.1	5.80932347871465	1.6245716793115	0.898296080642563	0.0290802896759339	NA	NA	NA
ENSG00000287255.1	9.07455013842239	1.62107195531024	0.663325618392815	0.0136281860082269	NA	NA	NA
ENSG00000286107.1	31.7353100943341	1.61591610989818	0.363197104128443	0.000523838435763157	NA	NA	NA
ENSG00000166448.14	78.6080762673033	1.61397468657334	0.286944398463303	4.65164807272913e-05	TMEM130	222865	transmembrane protein 130
ENSG00000147912.13	29.9051776266549	1.60983942607046	0.652222171113893	0.0133902518629058	FBXO10	26267	F-box protein 10
ENSG00000101680.15	479.367479740089	1.60964292516683	0.163157458097653	1.73095893060011e-10	LAMA1	284217	laminin subunit alpha 1
ENSG00000267640.6	7.53714648305605	1.60489799296275	0.719872283639434	0.0183156441913382	NA	NA	NA
ENSG00000084674.15	12.1984520858086	1.60066970548969	0.672174086054851	0.0151611797900468	APOB	338	apolipoprotein B
ENSG00000158125.10	25.4806154974601	1.59995593534477	0.619257925502794	0.011565495747947	XDH	7498	xanthine dehydrogenase
ENSG00000134508.12	20.6169826594429	1.59899114901252	0.473145235991731	0.00324511174498648	CABLES1	91768	Cdk5 and Abl enzyme substrate 1
ENSG00000154188.10	1601.35917047186	1.59760063998676	0.116674146376766	2.89981249893712e-17	ANGPT1	284	angiopoietin 1
ENSG00000104043.14	206.905289376841	1.59608997157844	0.231085972999075	2.19658534674573e-06	ATP8B4	79895	ATPase phospholipid transporting 8B4 (putative)
ENSG00000085831.15	15.8369698884711	1.59596630409399	0.681655224306877	0.0162434174032756	TTC39A	22996	tetratricopeptide repeat domain 39A
ENSG00000282943.1	45.2092130334078	1.59331132059633	0.338003323571897	0.000350054302128436	NA	NA	NA
ENSG00000187608.10	12.0336875907725	1.59304927091678	0.639257067096662	0.0132483120288999	ISG15	9636	ISG15 ubiquitin like modifier
ENSG00000102554.14	375.32086932359	1.59256088928643	1.02991856112846	0.0397571737515873	KLF5	688	Kruppel like factor 5
ENSG00000165124.18	1506.68524580285	1.59146269383132	0.121880156414991	6.69997673002274e-16	SVEP1	79987	sushi, von Willebrand factor type A, EGF and pentraxin domain containing 1
ENSG00000196711.9	24.2711712863196	1.59056100778258	0.401532115815695	0.00144300256203481	ALKAL1	389658	ALK and LTK ligand 1
ENSG00000105612.9	204.743050856964	1.58834151586469	0.209327373601485	4.06820301704503e-07	DNASE2	1777	deoxyribonuclease 2, lysosomal
ENSG00000244694.7	140.581954361549	1.58078728508966	0.205972932722055	3.33555010731341e-07	PTCHD4	442213	patched domain containing 4
ENSG00000261115.6	72.8981860928579	1.57996986509463	0.252941252898239	1.14361105835454e-05	TMEM178B	100507421	transmembrane protein 178B
ENSG00000203780.11	50.1964568305563	1.5775106910281	0.260406081482054	1.77901317098713e-05	FANK1	92565	fibronectin type III and ankyrin repeat domains 1
ENSG00000108244.17	27.4023873394715	1.57486903149089	0.365704804129881	0.000812682523054534	KRT23	25984	keratin 23
ENSG00000233901.6	569.946294594327	1.56904773830882	0.149212109225743	2.54298338957402e-11	LINC01503	100506119	long intergenic non-protein coding RNA 1503
ENSG00000171552.13	36.004262247962	1.56857734455646	0.47116488703447	0.00403240321711931	BCL2L1	598	BCL2 like 1
ENSG00000127124.16	13.3674282515712	1.56569519175178	0.768245603937122	0.0236470609245143	HIVEP3	59269	HIVEP zinc finger 3
ENSG00000267009.6	7.57631568368251	1.56145729825738	0.738333838501456	0.0219693001555397	NA	NA	NA
ENSG00000198216.12	10.7532966530803	1.55844377439581	0.573103321564285	0.00986241502711924	CACNA1E	777	calcium voltage-gated channel subunit alpha1 E
ENSG00000121104.8	7.29294955843345	1.55284284065703	0.909679489916376	0.0345829547837133	FAM117A	81558	family with sequence similarity 117 member A
ENSG00000280339.1	44.1120695634503	1.55158104551978	0.281804323018677	7.1454714280631e-05	NA	NA	NA
ENSG00000221852.5	1428.20341027597	1.55022327163062	0.205907246737377	6.23141666052428e-07	KRTAP1-5	83895	keratin associated protein 1-5
ENSG00000136003.15	440.503636618748	1.54828868173453	0.160701083510292	1.04713555958259e-09	ISCU	23479	iron-sulfur cluster assembly enzyme
ENSG00000165475.15	541.093294039127	1.54279167485634	0.159919877462557	1.25787066535071e-09	CRYL1	51084	crystallin lambda 1
ENSG00000158987.21	281.209586721121	1.54230441899982	0.735756839525722	0.0229939472812467	RAPGEF6	51735	Rap guanine nucleotide exchange factor 6
ENSG00000102802.10	101.940947312551	1.54090206795652	0.20853348973927	9.88813825524211e-07	MEDAG	84935	mesenteric estrogen dependent adipogenesis
ENSG00000117115.13	16.8340789505645	1.53786152323678	0.628471246827721	0.015263702874679	PADI2	11240	peptidyl arginine deiminase 2
ENSG00000141934.10	9.12638962407197	1.53758715871154	0.924524640167352	0.0371222839421114	PLPP2	8612	phospholipid phosphatase 2
ENSG00000233237.8	75.1923680828571	1.5368266873733	0.259116504337691	3.60164161103181e-05	LINC00472	79940	long intergenic non-protein coding RNA 472
ENSG00000203721.7	66.955515135663	1.53518783085371	0.234674377337654	7.50905334829154e-06	LINC00862	554279	long intergenic non-protein coding RNA 862
ENSG00000227110.7	11.5762345053722	1.5343020046573	0.638761665129473	0.0165586249773546	LMCD1-AS1	100288428	LMCD1 antisense RNA 1
ENSG00000141337.12	201.084650899829	1.53345657541339	0.177886356445073	3.31193127429242e-08	ARSG	22901	arylsulfatase G
ENSG00000166741.7	2350.55297853225	1.52799817739838	0.193857793069291	3.00721242505163e-07	NNMT	4837	nicotinamide N-methyltransferase
ENSG00000178222.13	29.1339744151699	1.52736467999536	0.390661336059514	0.0018426967689059	RNF212	285498	ring finger protein 212
ENSG00000204592.9	964.520865505376	1.52596188061499	0.319393291605638	0.000386977797772581	HLA-E	3133	major histocompatibility complex, class I, E
ENSG00000166510.14	69.5688258844305	1.5238016616013	0.228956999619472	5.56143383133831e-06	CCDC68	80323	coiled-coil domain containing 68
ENSG00000215105.4	29.8509148102942	1.52283012107951	0.347335798052285	0.000878264856792974	NA	NA	NA
ENSG00000204390.10	12.7370440752017	1.52088884770664	0.549493161166091	0.00998717147459014	HSPA1L	3305	heat shock protein family A (Hsp70) member 1 like
ENSG00000106992.19	69.1741293389468	1.51989730206033	0.416265146206456	0.00262151766290897	AK1	203	adenylate kinase 1
ENSG00000164050.13	59.1270395437981	1.51542295985556	0.289897243840942	0.000182398327709499	PLXNB1	5364	plexin B1
ENSG00000233952.1	19.4308048201848	1.51265813088238	0.433285049774094	0.00344005084966022	NA	NA	NA
ENSG00000119866.22	8.68001856181285	1.5124914226143	0.747627651752971	0.0253531876477271	BCL11A	53335	BAF chromatin remodeling complex subunit BCL11A
ENSG00000137494.14	167.569313560287	1.50914645059118	0.209341142050336	2.07645061655032e-06	ANKRD42	338699	ankyrin repeat domain 42
ENSG00000198074.10	16.3078833999417	1.5049282115693	0.543982190847608	0.0104884150152215	AKR1B10	57016	aldo-keto reductase family 1 member B10
ENSG00000048540.15	14.0476700625129	1.50427331559909	0.525564667788199	0.0091321980456346	LMO3	55885	LIM domain only 3
ENSG00000164056.11	52.6582955969553	1.50410027978748	0.295932835028781	0.000264884353638452	SPRY1	10252	sprouty RTK signaling antagonist 1
ENSG00000182326.15	6976.90136850943	1.50173797416015	0.0663299964973756	1.11845591061051e-38	C1S	716	complement C1s
ENSG00000240350.3	8.99230716659685	1.50091211001111	0.677510073565307	0.0210972501804883	NA	NA	NA
ENSG00000188906.16	43.7375450990584	1.49945209021384	0.883367204031437	0.0370394712312281	LRRK2	120892	leucine rich repeat kinase 2
ENSG00000165023.7	39.1567379628849	1.49908567540673	0.440290451749351	0.00427091457539642	DIRAS2	54769	DIRAS family GTPase 2
ENSG00000178038.17	21.1734963677291	1.49808160650247	0.547098270684464	0.0110411529128648	ALS2CL	259173	ALS2 C-terminal like
ENSG00000235525.1	10.7499178578262	1.49717171861853	0.64895955963408	0.0190658051417317	NA	NA	NA
ENSG00000174437.17	1333.07991796839	1.49209478577738	0.213503838025748	4.01638987270137e-06	ATP2A2	488	ATPase sarcoplasmic/endoplasmic reticulum Ca2+ transporting 2
ENSG00000085465.13	16.6692182526037	1.49134361691588	0.445645586266601	0.00497272021802893	OVGP1	5016	oviductal glycoprotein 1
ENSG00000049130.16	147.074399138798	1.48537443652397	0.180683298284104	1.72251442417017e-07	KITLG	4254	KIT ligand
ENSG00000279789.1	5.51544508306837	1.48460573237557	0.905790642086301	0.0394124677823313	NA	NA	NA
ENSG00000165091.17	75.5098384498709	1.48444812455609	0.246826531120975	4.42615311533949e-05	TMC1	117531	transmembrane channel like 1
ENSG00000171867.17	4782.97421761634	1.48302263800032	0.0985207987266799	1.09551264921255e-18	PRNP	5621	prion protein
ENSG00000272316.1	18.1278521607645	1.4801283564526	0.471050429801212	0.00651210331393525	NA	NA	NA
ENSG00000149131.16	1102.44322215916	1.47861533188813	0.127532199640872	4.56220526657762e-12	SERPING1	710	serpin family G member 1
ENSG00000181396.13	32.0088621184856	1.4778133001939	0.410467890111046	0.0031589794426323	OGFOD3	79701	2-oxoglutarate and iron dependent oxygenase domain containing 3
ENSG00000273802.2	27.9414289191407	1.47703481510949	0.354693841910106	0.00147596070445894	H2BC8	8339	H2B clustered histone 8
ENSG00000236548.2	50.4269394809987	1.47623650962201	0.264814060770367	0.000116569615515679	RNF217-AS1	7955	RNF217 antisense RNA 1 (head to head)
ENSG00000172059.11	137.51165400553	1.47462154921072	0.175601894389936	1.10257893539471e-07	KLF11	8462	Kruppel like factor 11
ENSG00000171533.11	34.7355516035491	1.47381053932008	0.307531614591715	0.000497635749658914	MAP6	4135	microtubule associated protein 6
ENSG00000116151.14	6.56731448984932	1.47130472509128	0.949158234523558	0.0442156014885954	MORN1	79906	MORN repeat containing 1
ENSG00000235997.3	9.4040315975053	1.46776858248906	0.664411312966107	0.0223495875730215	NA	NA	NA
ENSG00000128739.22	678.018512057967	1.46707661992769	0.599068774549956	0.017146345135962	SNRPN	6638	small nuclear ribonucleoprotein polypeptide N
ENSG00000139597.18	34.7827944939873	1.4664306778257	0.339279290136169	0.00119569173215198	N4BP2L1	90634	NEDD4 binding protein 2 like 1
ENSG00000110723.12	29.099252083113	1.4651129681793	0.411941175539	0.00368501693904736	EXPH5	23086	exophilin 5
ENSG00000050628.20	200.286337390631	1.4641828424839	0.224838133068425	1.39500731351815e-05	PTGER3	5733	prostaglandin E receptor 3
ENSG00000255471.1	33.9223174126069	1.46347848739751	0.870015539880078	0.0386400968458541	NA	NA	NA
ENSG00000074410.14	334.48054489681	1.45989315962274	0.132400994626013	4.03696985572845e-11	CA12	771	carbonic anhydrase 12
ENSG00000164122.9	9.63131719607018	1.459699077334	0.762165062613185	0.0308765949264267	ASB5	140458	ankyrin repeat and SOCS box containing 5
ENSG00000164199.18	10.042080698518	1.45843380166847	0.93767561674763	0.0444839983651009	ADGRV1	84059	adhesion G protein-coupled receptor V1
ENSG00000196689.12	11.0485675643229	1.45838407304053	0.582771216926776	0.0165060546537488	TRPV1	7442	transient receptor potential cation channel subfamily V member 1
ENSG00000182752.10	1894.62535898596	1.45646309865722	0.119503194471323	6.28840447694639e-13	PAPPA	5069	pappalysin 1
ENSG00000161381.14	24.0706980401888	1.45451980645519	0.554861309078501	0.0141599405746642	PLXDC1	57125	plexin domain containing 1
ENSG00000219607.3	13.6709722525153	1.45339108683837	0.544240263535898	0.0134376412753624	PPP1R3G	648791	protein phosphatase 1 regulatory subunit 3G
ENSG00000230438.7	17.4553792409913	1.45016551027205	0.538727807192761	0.0130596682614195	NA	NA	NA
ENSG00000162496.9	87.0324899668326	1.45002950092517	0.45763586792977	0.00686751088464991	DHRS3	9249	dehydrogenase/reductase 3
ENSG00000176723.10	11.9906010380333	1.44893118733336	0.559446552749362	0.0149076036979868	ZNF843	283933	zinc finger protein 843
ENSG00000274180.1	115.08381378665	1.4456335949982	0.196635066611616	2.87758889377835e-06	NATD1	256302	N-acetyltransferase domain containing 1
ENSG00000198624.13	60.64466847285	1.44441645197377	0.278336598345539	0.000296571603696146	CCDC69	26112	coiled-coil domain containing 69
ENSG00000232187.1	17.8575546886577	1.44283121437542	0.477691343815027	0.00828340609543047	NA	NA	NA
ENSG00000176222.9	71.1260319216083	1.44097848194304	0.25501672442163	0.000128158676352568	ZNF404	342908	zinc finger protein 404
ENSG00000061656.10	57.8531636646391	1.44031753171277	0.428404263910691	0.00550743546469569	SPAG4	6676	sperm associated antigen 4
ENSG00000247317.3	7.78228730826425	1.43872375398311	0.955878056826281	0.0477534551794732	NA	NA	NA
ENSG00000132465.11	571.434617559915	1.437195309599	0.288389298517864	0.000404983212723149	JCHAIN	3512	joining chain of multimeric IgA and IgM
ENSG00000282458.1	25.7122358207591	1.43687323764582	1.0103496620765	0.0517740158482502	WASH5P	375690	WASP family homolog 5, pseudogene
ENSG00000105989.10	6170.09788409147	1.43145516052516	0.161467556093823	5.13862919762814e-08	WNT2	7472	Wnt family member 2
ENSG00000165072.10	37.6305534647073	1.42965630854457	0.318263546547782	0.00107097900434718	MAMDC2	256691	MAM domain containing 2
ENSG00000241489.8	38.5492893430775	1.42848771082234	0.679622410433714	0.0258445250426723	NA	NA	NA
ENSG00000076641.4	138.714495393353	1.42746470749943	0.219384659723806	2.13211561319918e-05	PAG1	55824	phosphoprotein membrane anchor with glycosphingolipid microdomains 1
ENSG00000172270.20	171.994572903679	1.42307525468343	0.473475298022959	0.00905374484778705	BSG	682	basigin (Ok blood group)
ENSG00000224081.9	15.6771322722446	1.41995589120842	0.758229262837677	0.0329773737873654	SLC44A3-AS1	101928079	SLC44A3 antisense RNA 1
ENSG00000213453.3	17.5574101412536	1.40807654363182	0.491668663548732	0.0114779037586989	NA	NA	NA
ENSG00000145819.18	55.1144940211097	1.40375297222893	0.477152855489238	0.0103622222657102	ARHGAP26	23092	Rho GTPase activating protein 26
ENSG00000262312.2	5.27862793337771	1.40211328570904	1.04897419591138	0.0571081722803998	NA	NA	NA
ENSG00000124613.8	7.48899788510664	1.40089342080351	1.26926798476137	0.071446075690403	ZNF391	346157	zinc finger protein 391
ENSG00000167995.16	140.406766236619	1.39922004594679	0.172161181323349	7.96663377301978e-07	BEST1	7439	bestrophin 1
ENSG00000120594.17	28.0795936838483	1.39435765120285	0.390979585306537	0.00481863843091246	PLXDC2	84898	plexin domain containing 2
ENSG00000164077.14	11.4219240981593	1.39380263913562	0.619536517836127	0.0235805354586165	MON1A	84315	MON1 homolog A, secretory trafficking associated
ENSG00000149716.12	55.1849186481539	1.39213032482216	0.272114269700963	0.000414307829909229	LTO1	220064	LTO1 maturation factor of ABCE1
ENSG00000184530.9	8.35962263750523	1.39089705231696	0.765544346705072	0.0366255599787149	C6orf58	352999	chromosome 6 open reading frame 58
ENSG00000157680.15	308.993011006687	1.38999906439641	0.175609562396011	1.35325519127344e-06	DGKI	9162	diacylglycerol kinase iota
ENSG00000250508.1	11.2366482261688	1.38758520981986	0.570824896279848	0.0198955954402856	LINC02701	105369364	long intergenic non-protein coding RNA 2701
ENSG00000134245.18	132.116688886319	1.38699516135468	0.172158140451428	1.0521442846628e-06	WNT2B	7482	Wnt family member 2B
ENSG00000178852.16	9.67457462732609	1.38539532093153	1.36918383015703	0.0785581236265071	EFCAB13	124989	EF-hand calcium binding domain 13
ENSG00000185634.12	45.9590356098403	1.37975866079929	0.352409969240017	0.00281222122596604	SHC4	399694	SHC adaptor protein 4
ENSG00000275367.1	15.2176717993153	1.37770500233917	0.553668143521572	0.0189492271838563	NA	NA	NA
ENSG00000197647.11	87.0535471528369	1.37603656643738	0.307659372035398	0.00143237428310065	ZNF433	163059	zinc finger protein 433
ENSG00000178015.5	8.21745096520979	1.37485735031423	0.732467297871441	0.035231770809014	GPR150	285601	G protein-coupled receptor 150
ENSG00000120925.16	669.864029405798	1.37476402704587	0.616998902665961	0.024526684295834	RNF170	81790	ring finger protein 170
ENSG00000029534.20	114.594803202452	1.37462471636689	0.282808989498444	0.000756222974656749	ANK1	286	ankyrin 1
ENSG00000171812.13	155.121597434032	1.37310891817942	0.176626705053793	2.50844007486077e-06	COL8A2	1296	collagen type VIII alpha 2 chain
ENSG00000095209.12	248.903056162639	1.37207645277886	0.335218489147366	0.00220895205953795	TMEM38B	55151	transmembrane protein 38B
ENSG00000124762.13	864.80113549144	1.3714207539351	0.135147148689173	3.22315563306862e-09	CDKN1A	1026	cyclin dependent kinase inhibitor 1A
ENSG00000108846.16	200.205912265723	1.37081586939241	0.149246388266463	6.08914997109388e-08	ABCC3	8714	ATP binding cassette subfamily C member 3
ENSG00000226564.1	15.5594783777723	1.36835744651389	0.472001636800758	0.0121850487096584	NA	NA	NA
ENSG00000167779.9	159.348905856779	1.36645638083047	0.231946373727552	0.000142065487888263	IGFBP6	3489	insulin like growth factor binding protein 6
ENSG00000189283.10	37.5100904436489	1.36518007828344	0.935309240688153	0.0532048484322499	FHIT	2272	fragile histidine triad diadenosine triphosphatase
ENSG00000109738.11	317.800522855143	1.36256330857014	0.135368339706816	6.68609805804104e-09	GLRB	2743	glycine receptor beta
ENSG00000154358.21	15.8877514718882	1.36253382330755	0.831689739989157	0.0452929960911432	OBSCN	84033	obscurin, cytoskeletal calmodulin and titin-interacting RhoGEF
ENSG00000161011.20	3199.12350925693	1.35931661538932	0.431895899039879	0.00878155515026745	SQSTM1	8878	sequestosome 1
ENSG00000232177.1	11.3540333823203	1.35892113525914	0.577315909464971	0.0225415187815406	MTND4P24	100873254	MT-ND4 pseudogene 24
ENSG00000106780.9	221.577678219445	1.35251413695457	0.138723646781271	2.24268576674412e-08	MEGF9	1955	multiple EGF like domains 9
ENSG00000124225.16	71.4992710675812	1.35195866676242	0.236933241275482	0.00021401144838268	PMEPA1	56937	prostate transmembrane protein, androgen induced 1
ENSG00000123836.15	109.902599368097	1.35042742820937	0.195929225375152	1.90638937172191e-05	PFKFB2	5208	6-phosphofructo-2-kinase/fructose-2,6-biphosphatase 2
ENSG00000116663.11	64.1434753820562	1.3485215148749	0.391844106241745	0.00619245911633189	FBXO6	26270	F-box protein 6
ENSG00000179859.9	42.8427983234381	1.34639457233654	0.273228380800945	0.000791300431818366	RNF227	284023	ring finger protein 227
ENSG00000213614.9	1830.93118007271	1.34601281098057	0.279694930072749	0.000971854944742586	HEXA	3073	hexosaminidase subunit alpha
ENSG00000250416.2	21.0127959222225	1.34581054923126	0.436310391674658	0.0098207719893731	SEC63P2	100420287	SEC63 homolog, protein translocation regulator pseudogene 2
ENSG00000271787.1	32.9212670433958	1.34575588282804	0.363925174490457	0.00471745556512243	NA	NA	NA
ENSG00000197746.14	27868.932213062	1.34483939122433	0.266908116911723	0.000657187872243995	PSAP	5660	prosaposin
ENSG00000170323.9	6032.06200950483	1.34240876058357	0.135134464072956	1.8503306933329e-08	FABP4	2167	fatty acid binding protein 4
ENSG00000145390.11	5026.45674827459	1.34138588054913	0.158319632642503	7.73068843535088e-07	USP53	54532	ubiquitin specific peptidase 53
ENSG00000115084.14	1825.76654129012	1.34023445100429	0.115283698371864	1.03665172033316e-10	SLC35F5	80255	solute carrier family 35 member F5
ENSG00000176971.4	23.2619976823448	1.33896105358877	0.413838182594006	0.00832114958734807	FIBIN	387758	fin bud initiation factor homolog
ENSG00000104228.13	51.9422973146016	1.33867491128973	0.464068177737077	0.013342859314985	TRIM35	23087	tripartite motif containing 35
ENSG00000109323.11	507.188396720035	1.3372622753926	0.150746549351296	2.79125161871372e-07	MANBA	4126	mannosidase beta
ENSG00000105499.14	1005.2288380487	1.33478940251546	0.117255700720621	3.13394858748709e-10	PLA2G4C	8605	phospholipase A2 group IVC
ENSG00000106819.13	25.6189767893601	1.33265340978993	0.399215289329024	0.00748024235685684	ASPN	54829	asporin
ENSG00000131620.17	55.7838980270685	1.3293314409414	0.302859358882395	0.00190975609333188	ANO1	55107	anoctamin 1
ENSG00000203867.8	14.9343346549962	1.32921189629738	0.578932432826194	0.0248006904773909	RBM20	282996	RNA binding motif protein 20
ENSG00000261625.1	25.5614916771365	1.32831416290146	0.435868776899194	0.0111279323897106	NA	NA	NA
ENSG00000242441.8	19.9924242853789	1.32630316129576	0.46748304082475	0.0144568424553759	GTF2A1L	11036	general transcription factor IIA subunit 1 like
ENSG00000107984.10	6512.9047000779	1.32585923361491	0.137362302832982	4.29069316926825e-08	DKK1	22943	dickkopf WNT signaling pathway inhibitor 1
ENSG00000143162.9	206.58213940784	1.32551812694612	0.139124813577816	5.44039417016699e-08	CREG1	8804	cellular repressor of E1A stimulated genes 1
ENSG00000162804.14	20.0613762512223	1.32268821387604	0.518627868979718	0.0196575486544991	SNED1	25992	sushi, nidogen and EGF like domains 1
ENSG00000149090.11	4388.75508423468	1.32236868397601	0.239903767758866	0.000357803335125216	PAMR1	25891	peptidase domain containing associated with muscle regeneration 1
ENSG00000171246.6	32.1098061780316	1.32093940937608	0.332504166755311	0.00330971095362448	NPTX1	4884	neuronal pentraxin 1
ENSG00000174938.14	71.0881934087154	1.32088693474864	0.256370839466135	0.000632176996488285	SEZ6L2	26470	seizure related 6 homolog like 2
ENSG00000232368.1	251.841459532296	1.32006891753419	0.141535115541869	9.94686764271191e-08	NA	NA	NA
ENSG00000237637.1	6.35621590073684	1.31986392332433	0.874030842428424	0.0530132349482803	NA	NA	NA
ENSG00000261130.5	8.24553496757468	1.31967628823438	0.708692404692239	0.0382149606586468	MPV17L	255027	MPV17 mitochondrial inner membrane protein like
ENSG00000229227.8	10.0458827672905	1.31965866282732	0.819161484390455	0.0486766415922732	NA	NA	NA
ENSG00000177363.5	65.0075902537496	1.31792013022512	0.277948456327412	0.00127268012579301	LRRN4CL	221091	LRRN4 C-terminal like
ENSG00000111981.5	44.6529633366389	1.31611597739412	0.27863489743827	0.00136069864853544	ULBP1	80329	UL16 binding protein 1
ENSG00000146859.6	43.9690633452634	1.31589429607978	0.432513202912796	0.0118286746924776	TMEM140	55281	transmembrane protein 140
ENSG00000226200.7	14.8503017792302	1.31216321891712	0.552355680473336	0.023780142458904	NA	NA	NA
ENSG00000118194.20	5.92303328962358	1.31131286185018	0.974029259164426	0.0624072416330935	TNNT2	7139	troponin T2, cardiac type
ENSG00000234289.6	90.5430683801001	1.31016208860423	0.227347072305762	0.000261894293478887	H2BS1	54145	H2B.S histone 1
ENSG00000189058.9	51.5113052029341	1.30994760598265	0.264995323616433	0.000995988656352708	APOD	347	apolipoprotein D
ENSG00000197054.12	54.8572360787829	1.30837722454018	0.283074543920671	0.0015782526813285	ZNF763	284390	zinc finger protein 763
ENSG00000213928.9	284.843533619402	1.30724089148109	0.172863032211	7.09855036928115e-06	IRF9	10379	interferon regulatory factor 9
ENSG00000125551.19	33.1843521225547	1.29930732798679	0.449692486218942	0.0146066434953922	PLGLB2	5342	plasminogen like B2
ENSG00000231160.10	9.68614132530837	1.29847145331599	0.653998134061337	0.035394305223306	NA	NA	NA
ENSG00000160013.9	86.2642697397326	1.29833395812654	0.317060698400767	0.00303221496846416	PTGIR	5739	prostaglandin I2 receptor
ENSG00000166482.11	6566.1056095662	1.2969723799004	0.139036884120422	1.64720935039133e-07	MFAP4	4239	microfibril associated protein 4
ENSG00000234336.7	18.0891822933456	1.2968278783002	0.498437265585822	0.0197766161492817	NA	NA	NA
ENSG00000248483.7	8.45253687282268	1.29515039443305	0.670848491998949	0.0373713185404934	POU5F2	134187	POU domain class 5, transcription factor 2
ENSG00000273771.1	13.2092335885423	1.29302866089995	0.548816331948576	0.0250064173308986	NA	NA	NA
ENSG00000071967.12	2654.88250641152	1.29218796209062	0.11257626702044	7.01353848189213e-10	CYBRD1	79901	cytochrome b reductase 1
ENSG00000188766.12	6.46697512774505	1.291723972129	0.770953312254438	0.0472946000538338	SPRED3	399473	sprouty related EVH1 domain containing 3
ENSG00000273723.1	25.7856366324744	1.29049127065794	0.354801159240583	0.00597451166073165	SUGT1-DT	116435302	SUGT1 divergent transcript
ENSG00000116016.14	151.880723840109	1.2802001222471	0.158907799047539	4.23961877411923e-06	EPAS1	2034	endothelial PAS domain protein 1
ENSG00000054793.14	280.205992035511	1.27982518220606	0.132056680323737	8.4350016415755e-08	ATP9A	10079	ATPase phospholipid transporting 9A (putative)
ENSG00000119547.6	163.525766964832	1.27959679166923	0.162112989971673	5.04751178763122e-06	ONECUT2	9480	one cut homeobox 2
ENSG00000198814.12	507.377878532055	1.27907657240669	0.140877140894328	4.92993398720953e-07	GK	2710	glycerol kinase
ENSG00000232217.1	11.1759482844874	1.27810765170606	0.558763216951256	0.0276134686308838	FTLP8	100462790	ferritin light chain pseudogene 8
ENSG00000173611.17	162.38195124575	1.27439097805929	0.195825008623196	8.90712296489601e-05	SCAI	286205	suppressor of cancer cell invasion
ENSG00000165434.8	228.371051715074	1.27204855553634	0.156116535063339	3.79805065035828e-06	PGM2L1	283209	phosphoglucomutase 2 like 1
ENSG00000142102.16	5.82313040393249	1.27141490740311	2.14901368976504	0.117134610312481	PGGHG	80162	protein-glucosylgalactosylhydroxylysine glucosidase
ENSG00000171105.14	119.411527179089	1.26698186587191	0.205950916276191	0.000189451034001907	INSR	3643	insulin receptor
ENSG00000051009.10	13.1457303484513	1.26653939974257	0.650615240922624	0.0381302257017726	FHIP1B	84067	FHF complex subunit HOOK interacting protein 1B
ENSG00000230583.7	54.6545360857064	1.26390570816688	0.281141109098741	0.00214361977530883	GTF2IRD1P1	729156	GTF2I repeat domain containing 1 pseudogene 1
ENSG00000186417.14	41.8463940861909	1.26353485384827	0.328022425900598	0.00531571355270662	GLDN	342035	gliomedin
ENSG00000204386.11	593.108560191235	1.26208249489994	0.195805663925011	0.000126466586313629	NEU1	4758	neuraminidase 1
ENSG00000071282.12	442.533091869538	1.26038803501946	0.18151235541094	5.13368849685506e-05	LMCD1	29995	LIM and cysteine rich domains 1
ENSG00000136842.14	199.507659306528	1.2581879838333	0.19881575313954	0.000149833953061274	TMOD1	7111	tropomodulin 1
ENSG00000184205.14	30.75457672465	1.25656227480236	0.349546089071785	0.00713297040691137	TSPYL2	64061	TSPY like 2
ENSG00000168589.15	8.29074761653148	1.25567395474222	0.719268934136284	0.0465608359168401	DYNLRB2	83657	dynein light chain roadblock-type 2
ENSG00000256751.6	28.2396299686729	1.25524851630203	0.335590974259141	0.00603605171734681	PLBD1-AS1	101928290	PLBD1 antisense RNA 1
ENSG00000177993.3	9.36045083995223	1.25501679965042	0.723965545664144	0.047019056731983	ZNRF3-AS1	100874123	ZNRF3 antisense RNA 1
ENSG00000120327.6	8.2691332448752	1.25461453817829	0.776092806213459	0.0522491355474252	PCDHB14	56122	protocadherin beta 14
ENSG00000134627.12	8.84359797667687	1.2536893818209	0.712991807018156	0.0461957839585642	PIWIL4	143689	piwi like RNA-mediated gene silencing 4
ENSG00000155849.15	7.50540994353479	1.25355450340222	0.802850532130512	0.0545558816611692	ELMO1	9844	engulfment and cell motility 1
ENSG00000183486.13	31.21533836646	1.25112959139715	0.403404450191366	0.0132955877755499	MX2	4600	MX dynamin like GTPase 2
ENSG00000072840.13	154.242263849992	1.25021264894886	0.236221177548267	0.000856158295830635	EVC	2121	EvC ciliary complex subunit 1
ENSG00000166311.10	367.644522796536	1.2501967211965	0.145296353688884	2.31950067929045e-06	SMPD1	6609	sphingomyelin phosphodiesterase 1
ENSG00000064601.18	1448.39029097842	1.24949081765965	0.256899626359683	0.00155530020646796	CTSA	5476	cathepsin A
ENSG00000198794.12	29.9398370345583	1.24944963939825	0.360391802596077	0.00847315427074019	SCAMP5	192683	secretory carrier membrane protein 5
ENSG00000106415.13	241.314848641905	1.24918208491508	0.216581978860783	0.000395751267160732	GLCCI1	113263	glucocorticoid induced 1
ENSG00000155511.18	468.225926553702	1.24738574603139	0.119120701180595	3.15780287135551e-08	GRIA1	2890	glutamate ionotropic receptor AMPA type subunit 1
ENSG00000242779.7	84.6976568030809	1.24641580099523	0.282320584855767	0.0025661318870484	ZNF702P	79986	zinc finger protein 702, pseudogene
ENSG00000255052.5	43.2829984270853	1.24606051586826	0.288354261576702	0.00295032773875062	LOC112268389	112268389	uncharacterized LOC112268389
ENSG00000172738.12	63.283296621147	1.24178942232528	0.365753454643068	0.0095732387404487	TMEM217	221468	transmembrane protein 217
ENSG00000173727.12	97.8198431376433	1.24170968263647	0.253577529615982	0.0015667781299544	NA	NA	NA
ENSG00000159251.8	68.4897509960379	1.23762276503167	0.272075349490831	0.00225914974319553	ACTC1	70	actin alpha cardiac muscle 1
ENSG00000267858.6	5.05671922477413	1.23745431539636	0.947932816525545	0.0687330282133214	MZF1-AS1	100131691	MZF1 antisense RNA 1
ENSG00000228526.7	26.890781113753	1.23638653876434	0.369224975064449	0.0104042953555717	MIR34AHG	106614088	MIR34A host gene
ENSG00000128590.5	342.099257874196	1.2363086620451	0.113779778392314	1.76743709276029e-08	DNAJB9	4189	DnaJ heat shock protein family (Hsp40) member B9
ENSG00000204837.5	191.773981013495	1.23559022904338	0.369658271224816	0.0105727079969079	NA	NA	NA
ENSG00000167685.15	4.60950417856665	1.23146354812682	1.24638287220968	0.0889479046171279	ZNF444	55311	zinc finger protein 444
ENSG00000204311.14	22.7150828953688	1.2310028030222	0.404146999094498	0.0150086181072586	PJVK	494513	pejvakin
ENSG00000173258.13	176.668337101809	1.22803835081556	0.272582671296837	0.00241898747769967	ZNF483	158399	zinc finger protein 483
ENSG00000115267.8	73.7011077049253	1.22649146147916	0.215654294800525	0.000550859950433695	IFIH1	64135	interferon induced with helicase C domain 1
ENSG00000136867.11	188.5132557459	1.22640072282865	0.167014293313323	3.66751497225639e-05	SLC31A2	1318	solute carrier family 31 member 2
ENSG00000082497.12	213.766506728533	1.22336690486901	0.153530360463481	1.08741728248687e-05	SERTAD4	56256	SERTA domain containing 4
ENSG00000120262.10	102.096860201881	1.22228667368576	0.198118482566706	0.000286812796289643	CCDC170	80129	coiled-coil domain containing 170
ENSG00000143303.12	85.757730985365	1.22132018213375	0.312574024023685	0.00588470705828301	METTL25B	51093	methyltransferase like 25B
ENSG00000231721.7	67.9358062597989	1.22119993077824	0.343084904780261	0.00851134505136859	LINC-PINT	378805	long intergenic non-protein coding RNA, p53 induced transcript
ENSG00000256235.2	501.414370988474	1.22112460889139	0.135433214769392	1.52907765565824e-06	SMIM3	85027	small integral membrane protein 3
ENSG00000267053.8	9.59729662656968	1.2207536562462	0.755651390815223	0.0541680362277084	NA	NA	NA
ENSG00000010322.16	51.9143203962453	1.22056336574534	0.335577233122765	0.00776574539482945	NISCH	11188	nischarin
ENSG00000246523.8	9.39264510187154	1.21953141868609	0.620269366036803	0.0407947019259158	FZD4-DT	100506368	FZD4 divergent transcript
ENSG00000111912.20	150.788316717625	1.2182990905412	0.318828560603544	0.00644810571596969	NCOA7	135112	nuclear receptor coactivator 7
ENSG00000233860.2	10.4194738515413	1.21753989245717	0.585019358564745	0.0372050888555051	NA	NA	NA
ENSG00000000971.16	2179.18294813476	1.21752551235832	0.0934361648233339	9.37465373154198e-11	CFH	3075	complement factor H
ENSG00000105825.14	49.590765682837	1.21708965778859	0.608066874598182	0.0392401016284415	TFPI2	7980	tissue factor pathway inhibitor 2
ENSG00000274315.1	6.99783273975634	1.21667893001381	0.743254323227403	0.0537822950819943	NA	NA	NA
ENSG00000156381.9	9.84472859043644	1.21643029593224	0.621819818095891	0.0414877538044875	ANKRD9	122416	ankyrin repeat domain 9
ENSG00000172037.14	145.428180310959	1.21509953829112	0.244628347425246	0.00164881876335117	LAMB2	3913	laminin subunit beta 2
ENSG00000110092.4	324.275785800995	1.21348986926715	0.150472336398694	1.00822187243897e-05	CCND1	595	cyclin D1
ENSG00000186019.11	15.6756339855293	1.21265486223178	0.639587895433723	0.0435899821754529	LOC100379224	100379224	uncharacterized LOC100379224
ENSG00000121690.11	80.2952073118182	1.2118140968419	0.224527162142479	0.000987950261721649	DEPDC7	91614	DEP domain containing 7
ENSG00000169604.19	4721.97316346248	1.205571885505	0.0854841805937526	7.9296539435615e-12	ANTXR1	84168	ANTXR cell adhesion molecule 1
ENSG00000129048.7	1023.5277825426	1.20531994452005	0.0804217778571584	4.18949138949543e-13	ACKR4	51554	atypical chemokine receptor 4
ENSG00000072201.14	30.9950328325698	1.20376246019971	0.411648168480634	0.0182590033735497	LNX1	84708	ligand of numb-protein X 1
ENSG00000136928.7	6.91039697920063	1.20298210136047	0.827966859140969	0.0637131957291553	GABBR2	9568	gamma-aminobutyric acid type B receptor subunit 2
ENSG00000143226.14	16.3819363494111	1.20033943199633	0.496793150163613	0.0286359562663209	FCGR2A	2212	Fc fragment of IgG receptor IIa
ENSG00000164823.11	188.319219124848	1.19885620089595	0.160640017705117	4.49971803426821e-05	OSGIN2	734	oxidative stress induced growth inhibitor family member 2
ENSG00000166033.13	1769.22411199319	1.19776589398418	0.144030642096983	8.3467863607407e-06	HTRA1	5654	HtrA serine peptidase 1
ENSG00000125845.7	56.9089329995506	1.19495535438356	0.248347915855879	0.00212773317446004	BMP2	650	bone morphogenetic protein 2
ENSG00000179364.13	9.91871810301257	1.19409125324036	0.799506647146765	0.0627076418492463	PACS2	23241	phosphofurin acidic cluster sorting protein 2
ENSG00000260927.2	45.4639212040421	1.1935874394284	0.405073347549127	0.0183725609337723	LOC101927556	101927556	uncharacterized LOC101927556
ENSG00000267787.7	6.08277328988538	1.19306847923413	0.978426619536677	0.0764193190539451	NA	NA	NA
ENSG00000285815.1	139.350654029678	1.19292322049979	0.167044109866294	6.88727195944653e-05	GET1-SH3BGR	106865373	GET1-SH3BGR readthrough
ENSG00000234546.4	62.8822250805054	1.19218464151596	0.288379853288313	0.00528847537196156	LNCTAM34A	102724571	long non coding transcriptional activator of miR34a
ENSG00000260916.7	1437.43041100267	1.18964593889661	0.111179372865131	6.43972782904999e-08	CCPG1	9236	cell cycle progression 1
ENSG00000103111.15	2220.51954621374	1.18938821447216	0.174472428062495	0.000145748436793898	MON1B	22879	MON1 homolog B, secretory trafficking associated
ENSG00000112378.12	802.368104111511	1.18911582953636	0.118313308303062	3.81779861613229e-07	PERP	64065	p53 apoptosis effector related to PMP22
ENSG00000073910.22	1022.57377468149	1.18850944671724	0.168028627859656	8.76401085103089e-05	FRY	10129	FRY microtubule binding protein
ENSG00000224660.2	31.824882886835	1.18756979674669	0.460775655954865	0.0254228950361065	SH3BP5-AS1	100505696	SH3BP5 antisense RNA 1
ENSG00000152409.9	88.2859850778235	1.18714119480446	0.217400576599124	0.00109697657347276	JMY	133746	junction mediating and regulatory protein, p53 cofactor
ENSG00000196547.15	310.629799365545	1.18666573528453	0.200153338232958	0.000545350635721869	MAN2A2	4122	mannosidase alpha class 2A member 2
ENSG00000133805.15	526.79754416314	1.18180192706644	0.224273606656601	0.00145375862543642	AMPD3	272	adenosine monophosphate deaminase 3
ENSG00000148180.19	435.502186635052	1.18112856750916	0.148287025391353	2.04064497732886e-05	GSN	2934	gelsolin
ENSG00000176595.4	5.58901123782483	1.18102271816416	0.922267100539416	0.0739734856768452	KBTBD11	9920	kelch repeat and BTB domain containing 11
ENSG00000116260.17	328.267775899973	1.18023969941848	0.207964887863538	0.000863499418197995	QSOX1	5768	quiescin sulfhydryl oxidase 1
ENSG00000263412.1	11.1468937120927	1.17967533934196	1.0611201030139	0.0842743804113326	NFE2L1-DT	116435298	NFE2L1 divergent transcript
ENSG00000185499.16	36.0411494789333	1.17690482739607	0.351080164187849	0.0131067607627436	MUC1	4582	mucin 1, cell surface associated
ENSG00000276180.1	42.7384575956873	1.17306002983758	0.305535938262045	0.00769330830933308	H4C9	8294	H4 clustered histone 9
ENSG00000267254.7	30.8364555352076	1.17257608871124	0.400676968643689	0.0199550648122063	ZNF790-AS1	284408	ZNF790 antisense RNA 1
ENSG00000203709.12	12.4748948789374	1.17087132416022	0.593407854949539	0.0439476152370928	NA	NA	NA
ENSG00000248323.7	14.5099434482471	1.17044109854219	0.569966197024538	0.0415744602355755	LUCAT1	100505994	lung cancer associated transcript 1
ENSG00000166016.6	9.39156838921777	1.17007877244967	0.63775751861523	0.0494190216090019	ABTB2	25841	ankyrin repeat and BTB domain containing 2
ENSG00000152763.17	42.768878260926	1.16909535924842	0.510044826417555	0.0339378913640488	DNAI4	79819	dynein axonemal intermediate chain 4
ENSG00000231185.7	11.4213988715548	1.16857159980023	0.562394621519728	0.0405352332078381	SPRY4-AS1	101926941	SPRY4 antisense RNA 1
ENSG00000154721.15	1652.19154654324	1.16654543429776	0.103550022731983	3.87246415118464e-08	JAM2	58494	junctional adhesion molecule 2
ENSG00000261326.4	40.521750677754	1.16642256136139	0.306157962294758	0.00813295800618057	NA	NA	NA
ENSG00000144134.18	37.600972591196	1.16640654175805	0.387200396654557	0.0187179054041267	RABL2A	11159	RAB, member of RAS oncogene family like 2A
ENSG00000171815.5	6.28593268442088	1.16596766288668	0.869220933234908	0.0720761486906131	PCDHB1	29930	protocadherin beta 1
ENSG00000134242.16	5.83438668625046	1.16518027434184	0.937627527855827	0.0773806850651839	PTPN22	26191	protein tyrosine phosphatase non-receptor type 22
ENSG00000161010.15	687.869177603747	1.16497244729555	0.159509830705566	8.21110298126008e-05	MRNIP	51149	MRN complex interacting protein
ENSG00000128928.10	176.322953106904	1.16212658983034	0.258399402600601	0.00393894705042266	IVD	3712	isovaleryl-CoA dehydrogenase
ENSG00000140044.13	45.8895487767032	1.15884800123441	0.510744799775504	0.0356379846737465	JDP2	122953	Jun dimerization protein 2
ENSG00000172348.14	291.64940986887	1.15811637454468	0.134589744566631	9.04284681431281e-06	RCAN2	10231	regulator of calcineurin 2
ENSG00000116141.15	76.1037619494654	1.15771236910621	0.245997039919284	0.00301150033273038	MARK1	4139	microtubule affinity regulating kinase 1
ENSG00000162687.18	83.8373477654784	1.15461735742988	0.254731598402226	0.00398571636987933	KCNT2	343450	potassium sodium-activated channel subfamily T member 2
ENSG00000169129.15	57.9073606853501	1.15255462334661	0.254310918525658	0.0040794092088116	AFAP1L2	84632	actin filament associated protein 1 like 2
ENSG00000264112.1	36.0154981880561	1.15231376453553	0.328955536473321	0.0125030003239309	NA	NA	NA
ENSG00000270441.1	6.53807363081969	1.15229361942607	0.805803196075751	0.0685256799501025	NA	NA	NA
ENSG00000173209.23	259.498563426862	1.1519503051897	0.159822967825269	0.000129849927907125	AHSA2P	130872	activator of HSP90 ATPase homolog 2, pseudogene
ENSG00000006652.14	562.073938151305	1.15180757465678	0.204988885385384	0.00118621735625893	IFRD1	3475	interferon related developmental regulator 1
ENSG00000145675.15	1672.15441401625	1.15117147891615	0.0923329609961033	2.92195601111032e-09	PIK3R1	5295	phosphoinositide-3-kinase regulatory subunit 1
ENSG00000169174.11	10.4376065146676	1.14885188668971	0.736707300274419	0.0634100247461365	PCSK9	255738	proprotein convertase subtilisin/kexin type 9
ENSG00000023287.13	1495.78259152672	1.14846244224782	0.199003495192165	0.0010202800711573	RB1CC1	9821	RB1 inducible coiled-coil 1
ENSG00000239280.1	9.38128140973078	1.14758921572854	0.604049909520038	0.0488615725873657	NA	NA	NA
ENSG00000286697.1	11.5744561542282	1.14757306074945	0.586721383259691	0.0464694630162394	NA	NA	NA
ENSG00000267199.1	41.1394963724701	1.14652877894468	0.625390268134523	0.0513960764455961	NA	NA	NA
ENSG00000167740.9	188.801446602527	1.14617811377348	0.379891040900417	0.0200738136417683	CYB5D2	124936	cytochrome b5 domain containing 2
ENSG00000165807.8	14.3770162664046	1.14577825556939	0.527204570222245	0.0390681683221697	PPP1R36	145376	protein phosphatase 1 regulatory subunit 36
ENSG00000160097.18	53.4102852988508	1.14452557541415	0.255184599207982	0.00459164927154068	FNDC5	252995	fibronectin type III domain containing 5
ENSG00000159216.18	336.485880310046	1.1423701041698	0.17186081540416	0.000320506565620784	RUNX1	861	RUNX family transcription factor 1
ENSG00000177674.16	164.184111044784	1.14167608992573	0.743176961888282	0.0644227976148184	AGTRAP	57085	angiotensin II receptor associated protein
ENSG00000111670.16	1123.74873635147	1.14004928930962	0.11076383860649	7.27219003958034e-07	GNPTAB	79158	N-acetylglucosamine-1-phosphate transferase subunits alpha and beta
ENSG00000276107.1	153.513297534102	1.13935672394196	0.152613499273032	9.48410951089006e-05	NA	NA	NA
ENSG00000263155.6	80.2544496293615	1.13930397441984	0.253532803019022	0.0047427139906391	MYZAP	100820829	myocardial zonula adherens protein
ENSG00000163131.11	71.8145805191613	1.13926084846988	0.235051830119581	0.00293038644270907	CTSS	1520	cathepsin S
ENSG00000136828.19	16.1384314840733	1.13811501709719	0.543563780204296	0.0428802201800069	RALGPS1	9649	Ral GEF with PH domain and SH3 binding motif 1
ENSG00000115226.10	53.9401557397517	1.13721268646988	0.249475633643392	0.00436918814092395	FNDC4	64838	fibronectin type III domain containing 4
ENSG00000160271.16	31.7352322390472	1.13615367431792	0.946580237571743	0.082109854418096	RALGDS	5900	ral guanine nucleotide dissociation stimulator
ENSG00000213465.8	34.5563065938367	1.13603339063214	0.552498278243172	0.0440369493378017	ARL2	402	ADP ribosylation factor like GTPase 2
ENSG00000169126.16	273.816051614222	1.13315218831441	0.161017207865498	0.000211483337871004	ODAD2	55130	outer dynein arm docking complex subunit 2
ENSG00000103485.19	113.947533046503	1.13239911330227	0.183098699888471	0.000644635798939155	QPRT	23475	quinolinate phosphoribosyltransferase
ENSG00000131669.10	115.802741569025	1.13094714270545	0.448302314132954	0.0313310231703255	NINJ1	4814	ninjurin 1
ENSG00000137767.14	844.103103157474	1.13047544259078	0.163393486994011	0.000247002514142783	SQOR	58472	sulfide quinone oxidoreductase
ENSG00000142687.18	132.246063531748	1.1303974687595	0.241081271434051	0.00382282296613637	KIAA0319L	79932	KIAA0319 like
ENSG00000158406.4	59.6341195948704	1.13002165299972	0.306708792985833	0.0113901340429638	H4C8	8365	H4 clustered histone 8
ENSG00000048392.12	465.781588869534	1.12981674936178	0.143583368364647	5.4152816904494e-05	RRM2B	50484	ribonucleotide reductase regulatory TP53 inducible subunit M2B
ENSG00000114547.10	21.0075768653432	1.1290714276739	0.557084224988001	0.0458335308611532	ROPN1B	152015	rhophilin associated tail protein 1B
ENSG00000104361.10	253.885209940454	1.1274265430941	0.137720536930614	3.93280784989063e-05	NIPAL2	79815	NIPA like domain containing 2
ENSG00000280077.1	62.3850817631555	1.12738929315727	0.237770173533598	0.00370759070137025	NA	NA	NA
ENSG00000102804.15	230.704200206105	1.12636586577557	0.124933610081028	8.56841329175184e-06	TSC22D1	8848	TSC22 domain family member 1
ENSG00000225415.2	289.830147004119	1.12556122350255	0.150610363059329	0.000123132283496015	NA	NA	NA
ENSG00000145730.20	6495.19503915225	1.12550437342849	0.103136476036885	2.89838087787634e-07	PAM	5066	peptidylglycine alpha-amidating monooxygenase
ENSG00000163071.11	121.232015661531	1.12517664637043	0.19337642302326	0.00116775720487939	SPATA18	132671	spermatogenesis associated 18
ENSG00000113504.21	8.02960533337006	1.12244298368627	0.654195054637132	0.0573069887525397	SLC12A7	10723	solute carrier family 12 member 7
ENSG00000188002.10	27.4752947021791	1.1216568509212	0.357180050541802	0.0192419789274894	NA	NA	NA
ENSG00000072832.15	33.2985253399933	1.12113698086671	0.292016170671922	0.00990401758908653	CRMP1	1400	collapsin response mediator protein 1
ENSG00000082781.12	894.422236012119	1.12039982713137	0.220056553443261	0.002382131595598	ITGB5	3693	integrin subunit beta 5
ENSG00000119431.9	9.6604676974389	1.12002890106603	0.626998592101009	0.0549456304334344	HDHD3	81932	haloacid dehalogenase like hydrolase domain containing 3
ENSG00000185345.22	17.192633753469	1.11946035616014	0.489092081272892	0.0377916682099151	PRKN	5071	parkin RBR E3 ubiquitin protein ligase
ENSG00000171772.16	16.9997289006905	1.1181925954951	0.467590531189799	0.0354755215922344	SYCE1	93426	synaptonemal complex central element protein 1
ENSG00000188107.15	7.87460873096339	1.11693632649967	1.18788806800001	0.0998947907154741	EYS	346007	eyes shut homolog
ENSG00000172733.11	17.6486090972276	1.1156274132721	0.454499645677964	0.0336978272756945	PURG	29942	purine rich element binding protein G
ENSG00000090581.10	44.8637052399667	1.11305982872074	0.322697688386409	0.0155200198475171	GNPTG	84572	N-acetylglucosamine-1-phosphate transferase subunit gamma
ENSG00000109016.17	959.409346838069	1.11172756427061	0.139006148765826	5.92922275245369e-05	DHRS7B	25979	dehydrogenase/reductase 7B
ENSG00000170271.11	140.97385835174	1.1107792310643	0.175353149510874	0.000682723923112457	FAXDC2	10826	fatty acid hydroxylase domain containing 2
ENSG00000171951.5	10.6963028697425	1.11018094003042	0.623006897525297	0.0563183385706159	SCG2	7857	secretogranin II
ENSG00000211450.10	41.9468876529904	1.10843427426341	0.34723407171463	0.0193011697848111	SELENOH	280636	selenoprotein H
ENSG00000231566.2	39.3383311896701	1.10803456009166	0.306938481038453	0.0136760894159785	NA	NA	NA
ENSG00000065600.12	132.039728282484	1.10776901004617	0.206648316797664	0.00211193477867261	PACC1	55248	proton activated chloride channel 1
ENSG00000168890.14	32.8890260697705	1.1025765693711	0.322051636846123	0.0167701873779214	TMEM150A	129303	transmembrane protein 150A
ENSG00000121671.12	94.8515313710097	1.1020449964511	0.229006951122479	0.00419798840456944	CRY2	1408	cryptochrome circadian regulator 2
ENSG00000279267.1	27.9197756624557	1.10098886814361	0.408335713760344	0.0293026964502489	NA	NA	NA
ENSG00000183691.6	144.539533442067	1.0999616805502	0.180341252787411	0.00105372476230295	NOG	9241	noggin
ENSG00000186815.12	34.3853110501034	1.09984912595718	0.428979866590003	0.0321058590917103	TPCN1	53373	two pore segment channel 1
ENSG00000270188.1	18.5741055330238	1.09966438820395	0.435692751800997	0.0328973696400571	MTRNR2L11	100463489	MT-RNR2 like 11
ENSG00000031003.10	63.1405439564039	1.09954656331316	0.307966160525175	0.0146566621764724	FAM13B	51306	family with sequence similarity 13 member B
ENSG00000112511.17	44.2544996070557	1.0974393667679	0.350069206108933	0.0212826837222807	PHF1	5252	PHD finger protein 1
ENSG00000139973.16	194.777452408835	1.09674760366563	0.251257928231149	0.00690018874024796	SYT16	83851	synaptotagmin 16
ENSG00000103197.18	68.1329410296734	1.09624205924633	0.317216860123521	0.0166643861921842	TSC2	7249	TSC complex subunit 2
ENSG00000269028.3	2088.74110690991	1.09600387315467	0.130701872192864	4.96641846943369e-05	MTRNR2L2	100462981	MT-RNR2 like 2
ENSG00000216895.9	56.8486901001445	1.09557460696541	0.793558163415853	0.0762058774393312	LOC100506302	100506302	uncharacterized LOC100506302
ENSG00000247157.7	31.5574391979584	1.09533879299488	0.480763219181862	0.0407082692472989	LINC01252	338817	long intergenic non-protein coding RNA 1252
ENSG00000088448.14	424.902590237822	1.09310957976366	0.207208453331232	0.00247412279920069	ANKRD10	55608	ankyrin repeat domain 10
ENSG00000198959.12	1525.22488178827	1.09157018789161	0.1681483586166	0.000708550459512876	TGM2	7052	transglutaminase 2
ENSG00000286176.2	25.1542924264879	1.09139600395341	0.446001174178882	0.0362126915501167	LOC107986257	107986257	uncharacterized LOC107986257
ENSG00000197903.7	92.6623327714367	1.0910136999408	0.3106683825093	0.0161386599251017	H2BC12	85236	H2B clustered histone 12
ENSG00000137878.17	31.9611154970973	1.09006852556843	0.337773802700982	0.0206097825312535	GCOM1	145781	GCOM1, MYZAP-POLR2M combined locus
ENSG00000164125.15	510.722030386382	1.08915195605373	0.106391779987459	2.65175922723345e-06	GASK1B	51313	golgi associated kinase 1B
ENSG00000214226.9	15.72922369955	1.08868618242942	0.62544206831698	0.0604060750819723	C17orf67	339210	chromosome 17 open reading frame 67
ENSG00000285280.2	37.5369793716658	1.08863532934475	0.374629415553893	0.0255629358998678	LOC105371664	105371664	uncharacterized LOC105371664
ENSG00000144645.14	32.8258074319614	1.08825175672941	0.532996761860853	0.0492331751403881	OSBPL10	114884	oxysterol binding protein like 10
ENSG00000259658.5	9.85341511068468	1.08812801352333	0.557886222963085	0.0524395124865537	LOC100128108	100128108	ubiquitin-conjugating enzyme E2Q2 pseudogene
ENSG00000279117.1	109.094741654631	1.08789414665869	0.218975241195063	0.00384599496791621	NA	NA	NA
ENSG00000141448.10	10.5121361483727	1.08781363912899	0.634688352326025	0.0621068862105566	GATA6	2627	GATA binding protein 6
ENSG00000121316.11	148.838979942894	1.08776985870918	0.19849447594435	0.00215962361629976	PLBD1	79887	phospholipase B domain containing 1
ENSG00000285106.2	71.7588565062552	1.08774530192322	0.224788246140448	0.00456666319624774	NA	NA	NA
ENSG00000272872.1	55.7429786235238	1.08652185866094	0.249145264455503	0.00723591353055669	NA	NA	NA
ENSG00000157617.17	288.387653989186	1.0830463027435	0.124493615665317	3.99947934999073e-05	C2CD2	25966	C2 calcium dependent domain containing 2
ENSG00000163453.11	1878.9035893075	1.08236646091412	0.12008305719243	2.22440253880307e-05	IGFBP7	3490	insulin like growth factor binding protein 7
ENSG00000147408.14	8.20373139528682	1.08119067946493	0.941546488573466	0.0909158425213592	CSGALNACT1	55790	chondroitin sulfate N-acetylgalactosaminyltransferase 1
ENSG00000175455.15	1712.41116064921	1.08112527370774	0.107000544471026	3.90606449475652e-06	CCDC14	64770	coiled-coil domain containing 14
ENSG00000124635.8	37.8831856945546	1.08066591848662	0.389599786179582	0.0293769959567634	H2BC11	8970	H2B clustered histone 11
ENSG00000107099.15	47.9107059479907	1.08053380696597	0.470363562821556	0.0420082591537698	DOCK8	81704	dedicator of cytokinesis 8
ENSG00000251432.7	28.4099339994728	1.07996912062679	0.493224884871566	0.0450231467955785	LINC02615	100507487	long intergenic non-protein coding RNA 2615
ENSG00000155090.15	867.01784671861	1.07963142958952	0.109177481758432	4.89260169313421e-06	KLF10	7071	Kruppel like factor 10
ENSG00000082438.17	224.3363366312	1.07936044294165	0.259498411935652	0.00921117601684978	COBLL1	22837	cordon-bleu WH2 repeat protein like 1
ENSG00000147852.16	109.700056193504	1.07889201824232	0.182641621078699	0.00163660873800957	VLDLR	7436	very low density lipoprotein receptor
ENSG00000159307.19	183.701956138932	1.07607775159852	0.37489616278945	0.0277574939874591	SCUBE1	80274	signal peptide, CUB domain and EGF like domain containing 1
ENSG00000162413.16	161.365221605854	1.07605957580951	0.175112440328966	0.0013310891268339	KLHL21	9903	kelch like family member 21
ENSG00000175606.11	58.6250611917062	1.07490447304803	0.398179929026744	0.0315606301122295	TMEM70	54968	transmembrane protein 70
ENSG00000101439.9	163.310080879352	1.07130477165514	0.170101511519295	0.00114956635049011	CST3	1471	cystatin C
ENSG00000120669.16	24.580031598751	1.07130120480378	0.39794510211047	0.031871368194125	SOHLH2	54937	spermatogenesis and oogenesis specific basic helix-loop-helix 2
ENSG00000136542.9	1235.28358457158	1.06974634872042	0.129130963084268	8.34710492909948e-05	GALNT5	11227	polypeptide N-acetylgalactosaminyltransferase 5
ENSG00000189367.15	42.9940227225819	1.0696689903187	0.386541891186792	0.0307253755264357	KIAA0408	9729	KIAA0408
ENSG00000177854.8	22.9085548936463	1.0691216318583	0.470792606348112	0.043500807425046	TMEM187	8269	transmembrane protein 187
ENSG00000231742.6	17.1978924554003	1.06870218925794	0.46922882639111	0.0433224971021606	LINC01273	101927541	long intergenic non-protein coding RNA 1273
ENSG00000163346.17	178.696586324368	1.06777136460517	0.142910215289424	0.000280392279691193	PBXIP1	57326	PBX homeobox interacting protein 1
ENSG00000166278.15	53.1626685502881	1.06699758426286	0.333353420786387	0.0224773743509725	C2	717	complement C2
ENSG00000053747.16	141.237590442906	1.06633681258123	0.282670266561016	0.0143577021083478	LAMA3	3909	laminin subunit alpha 3
ENSG00000105443.15	25.689514765726	1.06592117230288	0.513170316817695	0.0501684159944586	CYTH2	9266	cytohesin 2
ENSG00000269834.6	30.5228079995976	1.06590789155517	0.352161429336637	0.0252139959898131	ZNF528-AS1	102724105	ZNF528 antisense RNA 1
ENSG00000141458.13	742.018771051073	1.06488757199467	0.152561235352239	0.000534425006921532	NPC1	4864	NPC intracellular cholesterol transporter 1
ENSG00000016391.11	77.6606718428699	1.06033226750368	0.21259336405375	0.00492127217191075	CHDH	55349	choline dehydrogenase
ENSG00000010810.17	132.157574505047	1.06013266638737	0.200051628756144	0.00335286522437237	FYN	2534	FYN proto-oncogene, Src family tyrosine kinase
ENSG00000185710.9	38.0714843624117	1.05973023543553	0.440216016313985	0.040448660744217	SMG1P4	100507526	SMG1 pseudogene 4
ENSG00000143819.12	30.9928745037899	1.0592000089573	0.340537099006654	0.0243213341910887	EPHX1	2052	epoxide hydrolase 1
ENSG00000198046.12	45.8528649532611	1.05818560982228	0.272295322895348	0.0137239472007447	ZNF667	63934	zinc finger protein 667
ENSG00000119655.10	17999.7597887505	1.0572104354293	0.116189132005575	3.53746599379692e-05	NPC2	10577	NPC intracellular cholesterol transporter 2
ENSG00000196418.12	35.480092147593	1.05700091219096	0.364879573745198	0.0287100831754166	ZNF124	7678	zinc finger protein 124
ENSG00000112902.12	2353.6920608652	1.05669172112846	0.112812055575128	2.31881454445576e-05	SEMA5A	9037	semaphorin 5A
ENSG00000177030.16	25.2198599865323	1.05596210127723	0.526191051348218	0.0538785297914798	DEAF1	10522	DEAF1 transcription factor
ENSG00000116783.15	7.8344183862071	1.05585778156822	0.725726168769384	0.0768464045512107	TNNI3K	51086	TNNI3 interacting kinase
ENSG00000280832.1	37.1991548866146	1.05570012503183	0.321510031939813	0.0221591315552941	NA	NA	NA
ENSG00000080823.23	17.4365514666393	1.05522142325268	0.568560125137813	0.0595064602499625	MOK	5891	MOK protein kinase
ENSG00000143013.13	265.09591987468	1.05482548944224	0.288328439142581	0.0168769537609503	LMO4	8543	LIM domain only 4
ENSG00000172667.11	962.261383361155	1.05344051549192	0.0822088287503238	6.7886923560195e-08	ZMAT3	64393	zinc finger matrin-type 3
ENSG00000273576.1	11.0163331707043	1.05208283256591	0.613495356340603	0.0659515812070184	NA	NA	NA
ENSG00000270074.1	60.503111812049	1.05166642503081	0.251332655031453	0.0108269497579962	NA	NA	NA
ENSG00000187566.6	12.7290481054282	1.05127992123394	0.530997863926804	0.0548477842676599	NHLRC1	378884	NHL repeat containing E3 ubiquitin protein ligase 1
ENSG00000213742.7	114.116654551811	1.05092172974298	0.297923717501891	0.018833202634278	ZNF337-AS1	102724826	ZNF337 antisense RNA 1
ENSG00000181634.8	32.3394734870577	1.05004943451007	0.361211875781524	0.029525623294939	TNFSF15	9966	TNF superfamily member 15
ENSG00000075223.14	52.1170936155378	1.04999798790708	0.273097151943125	0.0147568760395811	SEMA3C	10512	semaphorin 3C
ENSG00000273148.1	15.7785304985561	1.0481871557879	0.455278476637222	0.0451131235473862	NA	NA	NA
ENSG00000156804.7	188.427541670812	1.04712939083692	0.277607292276147	0.0160862945749163	FBXO32	114907	F-box protein 32
ENSG00000182220.15	5803.17210996654	1.04637600445848	0.122673686872701	9.62978194457591e-05	ATP6AP2	10159	ATPase H+ transporting accessory protein 2
ENSG00000052795.13	222.31861560796	1.04505910419341	0.149636833155126	0.000695634131409382	FNIP2	57600	folliculin interacting protein 2
ENSG00000163820.15	730.765014156108	1.04427064469973	0.127229301682892	0.00015396978413985	FYCO1	79443	FYVE and coiled-coil domain autophagy adaptor 1
ENSG00000273033.2	197.021973133469	1.04408372070571	0.143557704853073	0.00049249724233573	LINC02035	100129550	long intergenic non-protein coding RNA 2035
ENSG00000008256.16	46.9224656568791	1.04387400926653	0.274489302221652	0.0160343742954558	CYTH3	9265	cytohesin 3
ENSG00000117984.14	128.216871694194	1.04324388455076	0.204294893134298	0.00507654546802396	CTSD	1509	cathepsin D
ENSG00000179163.11	155.67217776963	1.04290055394037	0.16553428229825	0.00154383021343404	FUCA1	2517	alpha-L-fucosidase 1
ENSG00000109610.6	42.1568017546823	1.04277008673686	0.373226968348774	0.0324202469064534	SOD3	6649	superoxide dismutase 3
ENSG00000162817.7	206.560247616079	1.03957994623384	0.159467048998774	0.00132132695663573	C1orf115	79762	chromosome 1 open reading frame 115
ENSG00000102287.19	141.151746249406	1.0382829783068	0.183682911066818	0.00285112518730328	GABRE	2564	gamma-aminobutyric acid type A receptor subunit epsilon
ENSG00000197324.9	693.360792479068	1.03769886357399	0.122498438533708	0.000133278791096081	LRP10	26020	LDL receptor related protein 10
ENSG00000277511.1	16.6951492816156	1.03721506437809	0.455166686954428	0.0469271919057465	NA	NA	NA
ENSG00000267680.5	146.558890671595	1.03707533953205	0.183704745898361	0.0028708842777089	ZNF224	7767	zinc finger protein 224
ENSG00000181007.9	151.293815730413	1.03688546041798	0.186901417333418	0.00311639261653151	ZFP82	284406	ZFP82 zinc finger protein
ENSG00000242759.8	27.2081755647665	1.03525375121288	0.440066955142563	0.045203069269586	NA	NA	NA
ENSG00000180257.13	86.288587863838	1.03483176318267	0.271425788921862	0.0166114244709042	ZNF816	125893	zinc finger protein 816
ENSG00000219626.9	140.466839113815	1.03463924905252	0.239069033584696	0.0106569319793745	FAM228B	375190	family with sequence similarity 228 member B
ENSG00000038945.15	21.9653688486996	1.0337838277407	0.387074055450976	0.0365427552611489	MSR1	4481	macrophage scavenger receptor 1
ENSG00000171606.18	94.9402842664964	1.0330310472122	0.268889289034996	0.0162959682603098	ZNF274	10782	zinc finger protein 274
ENSG00000240303.8	355.752384036755	1.03232312392109	0.123247831957822	0.000156064575569761	ACAD11	84129	acyl-CoA dehydrogenase family member 11
ENSG00000010404.18	1007.9944129669	1.03183704830266	0.100553738271847	1.0607242847331e-05	IDS	3423	iduronate 2-sulfatase
ENSG00000112200.17	416.328829543505	1.03174673043492	0.240692784883369	0.0111714552190737	ZNF451	26036	zinc finger protein 451
ENSG00000013288.9	161.55337275832	1.03173646066049	0.182809661213108	0.00299094447176577	MAN2B2	23324	mannosidase alpha class 2B member 2
ENSG00000107201.10	141.673763475447	1.03041324785399	0.155314713206191	0.0013018120495198	DDX58	23586	DExD/H-box helicase 58
ENSG00000226608.3	659.586591602264	1.0303193466652	0.127229585701254	0.000232342325796869	NA	NA	NA
ENSG00000174485.15	317.242519171099	1.02888512036081	0.21371252500777	0.0070987206145905	DENND4A	10260	DENN domain containing 4A
ENSG00000197046.12	13.0648528242991	1.02883935546849	0.578086299476042	0.0662578467748028	SIGLEC15	284266	sialic acid binding Ig like lectin 15
ENSG00000219200.11	1529.08000792755	1.02871706599409	0.224634542709891	0.00862655675644722	RNASEK	440400	ribonuclease K
ENSG00000240591.2	5.52440301192147	1.02865217269218	0.896161006921257	0.0959971147126036	NA	NA	NA
ENSG00000073792.15	135.950461382014	1.02860530742433	0.400803651823988	0.0394986296735844	IGF2BP2	10644	insulin like growth factor 2 mRNA binding protein 2
ENSG00000242094.1	6.45927322999749	1.02785896551158	0.765760402648862	0.0862238880089248	NA	NA	NA
ENSG00000223745.8	280.953290230723	1.02783428389628	0.17345688245071	0.00232785020023055	NA	NA	NA
ENSG00000223393.2	8.2118704132907	1.02655226845997	0.744858136811755	0.0843827924554659	NA	NA	NA
ENSG00000196352.15	583.640708433512	1.02620765357014	0.126961512243809	0.000258898802400645	CD55	1604	CD55 molecule (Cromer blood group)
ENSG00000116005.12	2910.48107353387	1.02567720897457	0.0961535419646596	6.11096936820976e-06	PCYOX1	51449	prenylcysteine oxidase 1
ENSG00000227268.4	13.4609420980592	1.02509153456493	0.50195366731445	0.0559251876096624	KLLN	100144748	killin, p53 regulated DNA replication inhibitor
ENSG00000135047.15	4688.53477435585	1.02489102556465	0.0707244298820527	1.197213874804e-08	CTSL	1514	cathepsin L
ENSG00000223551.1	571.881155384189	1.02479678684879	0.189817307942976	0.00434466303419142	TMSB4XP4	7118	TMSB4X pseudogene 4
ENSG00000227398.4	24.3718160021982	1.02415824991222	0.372346483971806	0.0358014714946071	NA	NA	NA
ENSG00000198590.12	10.0096308724436	1.02386791671754	0.670258923505284	0.077166732455429	C3orf35	339883	chromosome 3 open reading frame 35
ENSG00000104774.13	17.0294853565917	1.02379186748464	0.56520053996422	0.0654411943907039	MAN2B1	4125	mannosidase alpha class 2B member 1
ENSG00000197536.11	18.2230302140536	1.02357763095003	0.414173363684267	0.0431443925164845	NA	NA	NA
ENSG00000070371.16	23.3228622064334	1.02225109481978	0.633483540975276	0.073655557261305	CLTCL1	8218	clathrin heavy chain like 1
ENSG00000133687.16	1627.74619265028	1.02159419786467	0.113099537113011	7.40751871211526e-05	TMTC1	83857	transmembrane O-mannosyltransferase targeting cadherins 1
ENSG00000156521.14	52.1498382498887	1.02066210172017	0.297948048962312	0.0231237959402066	TYSND1	219743	trypsin like peroxisomal matrix peptidase 1
ENSG00000118523.6	8467.86462821724	1.01654265214396	0.10403381704289	3.40932348879593e-05	CCN2	1490	cellular communication network factor 2
ENSG00000166348.18	51.3029805994213	1.01604166783232	0.323985864481639	0.0283419331939081	USP54	159195	ubiquitin specific peptidase 54
ENSG00000134376.16	13.7989622268509	1.01603855656211	1.0935748858487	0.109233380938677	CRB1	23418	crumbs cell polarity complex component 1
ENSG00000240891.8	11.4929167294902	1.01419849480025	0.571927600681501	0.0681109758589617	PLCXD2	257068	phosphatidylinositol specific phospholipase C X domain containing 2
ENSG00000127328.21	113.630622054223	1.00930185840878	0.195670856200469	0.00606708722721771	RAB3IP	117177	RAB3A interacting protein
ENSG00000204520.14	2068.12274072291	1.00926543410896	0.0942391055602114	9.82096411640912e-06	MICA	100507436	MHC class I polypeptide-related sequence A
ENSG00000265298.1	21.7011663450256	1.00811348726181	0.427718497300314	0.0484915573256796	LOC101929240	101929240	U5 small nuclear ribonucleoprotein 200 kDa helicase pseudogene
ENSG00000159915.12	19.2933639274237	1.00703347260215	0.426865405530923	0.0487690797438935	ZNF233	353355	zinc finger protein 233
ENSG00000240990.10	25.3225277879383	1.00696303383991	0.379082588011997	0.0400166147978813	HOXA11-AS	221883	HOXA11 antisense RNA
ENSG00000198932.13	60.0658399230753	1.00695076112261	0.2438058714233	0.0150591855514255	GPRASP1	9737	G protein-coupled receptor associated sorting protein 1
ENSG00000141562.18	165.969047894445	1.00685399791923	0.828838663878379	0.0947780072443055	NARF	26502	nuclear prelamin A recognition factor
ENSG00000130956.14	50.7337401061446	1.00649035356735	0.257582553808607	0.0177509978832887	HABP4	22927	hyaluronan binding protein 4
ENSG00000108582.12	1640.90005725255	1.00612775951606	0.098314713920957	2.4617076361397e-05	CPD	1362	carboxypeptidase D
ENSG00000163513.19	352.840674774956	1.00330510604378	0.118397273849088	0.000241095769763822	TGFBR2	7048	transforming growth factor beta receptor 2
ENSG00000145934.16	210.324411824048	1.00316128810261	0.209727384296251	0.00882038477115783	TENM2	57451	teneurin transmembrane protein 2
ENSG00000184307.15	15.1320686499534	1.00255033840027	0.714539466124678	0.0864410627771719	ZDHHC23	254887	zinc finger DHHC-type palmitoyltransferase 23
ENSG00000170581.14	941.254012925328	1.00249038453178	0.113394985713161	0.000160283301387726	STAT2	6773	signal transducer and activator of transcription 2
ENSG00000197927.13	5.9109299593248	1.0016753606455	0.968100795929755	0.104265329990108	NBEAP2	100418881	neurobeachin pseudogene 2
ENSG00000168528.12	32.9867356770136	1.00165963796127	0.303557381945436	0.0273978184313455	SERINC2	347735	serine incorporator 2
ENSG00000173530.6	401.758090196765	1.00003645629314	0.18001455499257	0.00494701100731875	TNFRSF10D	8793	TNF receptor superfamily member 10d
ENSG00000164627.18	182.531243617707	0.999863655407404	0.162414821037257	0.00260305533415233	KIF6	221458	kinesin family member 6
ENSG00000080031.10	10.8444324894013	0.999520527771723	0.788581090984032	0.0930085212098473	PTPRH	5794	protein tyrosine phosphatase receptor type H
ENSG00000100445.17	151.002174157091	0.998396083457755	0.310539562264709	0.0289321902723877	SDR39U1	56948	short chain dehydrogenase/reductase family 39U member 1
ENSG00000164949.8	120.282753047161	0.996317040305266	0.191310502547553	0.0066729006695951	GEM	2669	GTP binding protein overexpressed in skeletal muscle
ENSG00000259305.6	27.535533484813	0.996207933093672	0.362341541609532	0.0389824344625942	ZHX1-C8orf76	100533106	ZHX1-C8orf76 readthrough
ENSG00000110446.11	94.6175727861325	0.995782484478454	0.230054905106807	0.0139164444095993	SLC15A3	51296	solute carrier family 15 member 3
ENSG00000117643.14	166.893452782884	0.993473501515219	0.216191458977879	0.0113463725122022	MAN1C1	57134	mannosidase alpha class 1C member 1
ENSG00000245275.8	25.2574090402257	0.993336571766252	0.403168423289052	0.04756989603207	SAP30L-AS1	386627	SAP30L antisense RNA 1 (head to head)
ENSG00000226985.7	7.24655775623569	0.992202381126849	0.718315912363548	0.0890569563120317	LINC01203	100133123	long intergenic non-protein coding RNA 1203
ENSG00000162819.12	4767.48644215261	0.991339888833739	0.197733065170467	0.00798482019575074	BROX	148362	BRO1 domain and CAAX motif containing
ENSG00000152377.14	3260.89789132334	0.991054560326794	0.0750776960263328	5.45353113237001e-07	SPOCK1	6695	SPARC (osteonectin), cwcv and kazal like domains proteoglycan 1
ENSG00000082641.16	327.062666287419	0.9905630720007	0.130257195203924	0.000798430309250465	NFE2L1	4779	nuclear factor, erythroid 2 like 1
ENSG00000163659.13	198.795953514372	0.990212958972626	0.16821607697582	0.00386916428252951	TIPARP	25976	TCDD inducible poly(ADP-ribose) polymerase
ENSG00000153246.13	417.707612911579	0.990165216107811	0.211652612226598	0.0109550997698463	PLA2R1	22925	phospholipase A2 receptor 1
ENSG00000138593.9	843.936430641227	0.989780186224569	0.138890647198967	0.00139054749961236	SECISBP2L	9728	SECIS binding protein 2 like
ENSG00000167632.16	25.4387083144434	0.986701523067132	0.544154430176354	0.0703984082250469	TRAPPC9	83696	trafficking protein particle complex subunit 9
ENSG00000121064.13	2920.22372289283	0.986343548493972	0.0929720448335845	2.51204861499718e-05	SCPEP1	59342	serine carboxypeptidase 1
ENSG00000048471.14	203.967474446851	0.986337351633324	0.32171459684253	0.0330573439755851	SNX29	92017	sorting nexin 29
ENSG00000240694.9	13.1215163394056	0.986088457273731	0.843462400601929	0.100117628765642	PNMA2	10687	PNMA family member 2
ENSG00000261051.1	10.5257698817267	0.985945831474292	0.694843098549707	0.087965065515506	NA	NA	NA
ENSG00000172731.14	86.1021807521248	0.985705690092078	0.239024154138893	0.0172008813631107	LRRC20	55222	leucine rich repeat containing 20
ENSG00000074181.9	29.9477048773567	0.984553438924378	0.350209044433949	0.0391540198159499	NOTCH3	4854	notch receptor 3
ENSG00000172638.13	245.759571541136	0.984079844943398	0.299925128984532	0.0298234288366306	EFEMP2	30008	EGF containing fibulin extracellular matrix protein 2
ENSG00000257727.6	167.125819604553	0.98309185270198	0.211328019144194	0.0119172346101753	CNPY2	10330	canopy FGF signaling regulator 2
ENSG00000156711.17	46.0787169077299	0.981971153757762	0.299101748208783	0.0299725528083734	MAPK13	5603	mitogen-activated protein kinase 13
ENSG00000030582.18	530.474028061217	0.981819645097704	0.145346149024281	0.00202206068104218	GRN	2896	granulin precursor
ENSG00000219693.3	75.4246959748999	0.981494703733289	0.242440409382567	0.0184297405835498	NA	NA	NA
ENSG00000248429.5	93.2418156790586	0.980135433072387	0.259415713337816	0.0222225699479341	GASK1B-AS1	285505	GASK1B antisense RNA 1
ENSG00000228340.6	150.077512000616	0.979928022109591	0.159003447320776	0.00328815367475856	MIR646HG	284757	MIR646 host gene
ENSG00000135968.21	426.355381412535	0.979410302253947	0.211110785373193	0.0123208046698687	GCC2	9648	GRIP and coiled-coil domain containing 2
ENSG00000106537.8	127.62562930565	0.97910249595358	0.187015647737207	0.00740960058018606	TSPAN13	27075	tetraspanin 13
ENSG00000261087.1	16.4511084638115	0.978110026115374	0.462593932876214	0.0606062699624594	ZNNT1	115830329	ZNF706 neighboring transcript 1
ENSG00000125245.12	6.55309842273361	0.977677164225434	0.852775069337116	0.102127442420551	GPR18	2841	G protein-coupled receptor 18
ENSG00000206567.10	20.0933095911076	0.977396993263325	0.522773374025569	0.0696694525449059	NA	NA	NA
ENSG00000067113.17	1673.79086837152	0.976523941223243	0.0804607540578115	4.4714187097454e-06	PLPP1	8611	phospholipid phosphatase 1
ENSG00000144560.15	24.6243691112554	0.974678435369374	0.44301264911206	0.0574068671072268	VGLL4	9686	vestigial like family member 4
ENSG00000250362.1	7.20061006412477	0.974655231716401	0.70653453962528	0.0911356226735514	NA	NA	NA
ENSG00000183049.12	98.0537769958482	0.974521276378987	0.276880122881164	0.0267601834108761	CAMK1D	57118	calcium/calmodulin dependent protein kinase ID
ENSG00000187688.15	107.614066287091	0.97380516499535	0.457496456246256	0.0610068197325235	TRPV2	51393	transient receptor potential cation channel subfamily V member 2
ENSG00000011347.10	8.28252960555827	0.972848808584769	0.687820202832155	0.0900407765691145	SYT7	9066	synaptotagmin 7
ENSG00000204403.9	24.0494159693379	0.972455195043922	0.392709606587492	0.0499803360520687	CASP12	100506742	caspase 12 (gene/pseudogene)
ENSG00000151067.22	64.6805314853428	0.972375073102976	0.330766523226741	0.0380454731244424	CACNA1C	775	calcium voltage-gated channel subunit alpha1 C
ENSG00000141753.7	4953.87908557935	0.971565502345437	0.12744011116011	0.00112303321086302	IGFBP4	3487	insulin like growth factor binding protein 4
ENSG00000167106.12	39.4882674122484	0.970396192978131	0.379654985083422	0.0483064212510889	FAM102A	399665	family with sequence similarity 102 member A
ENSG00000184500.16	116.671656810743	0.970272383017517	0.181869162612583	0.00744494696426395	PROS1	5627	protein S
ENSG00000136999.5	32.7251357808553	0.96959007130098	0.373017565382156	0.0472027401066495	CCN3	4856	cellular communication network factor 3
ENSG00000254887.1	16.861950230765	0.969527107195116	0.530695365357028	0.0727062781832057	POU2F2-AS1	100505622	POU2F2 antisense RNA 1
ENSG00000134539.17	23.6265118417931	0.966142646688042	1.35473420288373	0.128859066459206	KLRD1	3824	killer cell lectin like receptor D1
ENSG00000183597.16	129.426361086572	0.966070447482693	0.246672747725391	0.0219060932886175	TANGO2	128989	transport and golgi organization 2 homolog
ENSG00000109046.15	1317.52135851144	0.965493372141532	0.101885754265528	0.000180085844011902	WSB1	26118	WD repeat and SOCS box containing 1
ENSG00000213398.8	5.6253167551414	0.964356379627326	1.18089944171213	0.122553205434023	LCAT	3931	lecithin-cholesterol acyltransferase
ENSG00000156471.13	1036.3373376091	0.962808957052897	0.0840533818397379	1.57881493493736e-05	PTDSS1	9791	phosphatidylserine synthase 1
ENSG00000139132.14	516.932166572484	0.96251910507184	0.192873697794953	0.0107844039024757	FGD4	121512	FYVE, RhoGEF and PH domain containing 4
ENSG00000049860.14	1538.21404553476	0.962362524712591	0.104127617277198	0.000249953508567963	HEXB	3074	hexosaminidase subunit beta
ENSG00000267454.6	200.785326106149	0.962032325251903	0.171604566330757	0.00670520022812698	ZNF582-DT	386758	ZNF582 divergent transcript
ENSG00000089335.21	159.881262401128	0.961168974832295	0.171992561693241	0.00693281060028138	ZNF302	55900	zinc finger protein 302
ENSG00000154122.14	380.10699876714	0.961125317123775	0.152241226385788	0.00373038244799381	ANKH	56172	ANKH inorganic pyrophosphate transport regulator
ENSG00000214922.9	45.1719013327219	0.960735105658236	0.315639545261356	0.037539200437836	HLA-F-AS1	285830	HLA-F antisense RNA 1
ENSG00000106125.14	65.4977611218738	0.960539848152541	0.263674789532326	0.026619025305397	MINDY4	84182	MINDY lysine 48 deubiquitinase 4
ENSG00000206535.8	157.102271124756	0.958931948020096	0.155762636363652	0.00454165879897241	LNP1	348801	leukemia NUP98 fusion partner 1
ENSG00000171121.16	24.9134730232202	0.958752134001665	0.873103225937592	0.106299399265936	KCNMB3	27094	potassium calcium-activated channel subfamily M regulatory beta subunit 3
ENSG00000183060.15	76.6732566851197	0.957788976695778	0.332773025171099	0.0425301244731872	LYSMD4	145748	LysM domain containing 4
ENSG00000136816.16	177.660914875593	0.957235562211834	0.167512190110676	0.00628808231364169	TOR1B	27348	torsin family 1 member B
ENSG00000173641.17	18.3493249930186	0.957057869874832	0.47310352912591	0.0672854185935532	HSPB7	27129	heat shock protein family B (small) member 7
ENSG00000124155.18	1157.36952199691	0.956242896581211	0.472050695310831	0.0673885940283182	PIGT	51604	phosphatidylinositol glycan anchor biosynthesis class T
ENSG00000164081.12	161.755930140769	0.954295901737496	0.42548997210917	0.0602058368642344	TEX264	51368	testis expressed 264, ER-phagy receptor
ENSG00000137478.15	335.08276331272	0.953997125036812	0.145524283210685	0.00318048169136112	FCHSD2	9873	FCH and double SH3 domains 2
ENSG00000197892.13	578.472558413067	0.95359138055828	0.120071253224506	0.00113179070639713	KIF13B	23303	kinesin family member 13B
ENSG00000137103.20	55.4083616231046	0.953505850579349	0.301616999612768	0.0363774734308274	TMEM8B	51754	transmembrane protein 8B
ENSG00000088367.23	58.0976966111685	0.952561950925262	0.222021976611504	0.0188910956937467	EPB41L1	2036	erythrocyte membrane protein band 4.1 like 1
ENSG00000113742.14	406.302533548509	0.951071975644138	0.136172227072653	0.00231034135770566	CPEB4	80315	cytoplasmic polyadenylation element binding protein 4
ENSG00000168010.11	19.2343914965155	0.950375065755257	0.439042709402598	0.0640165122157474	ATG16L2	89849	autophagy related 16 like 2
ENSG00000231711.2	24.2702550213019	0.949842487831875	0.747669389645412	0.100228905390733	NA	NA	NA
ENSG00000287286.1	62.5294908519267	0.94938355885556	0.25475465953513	0.0269720899286538	NA	NA	NA
ENSG00000168003.16	105.173597824032	0.949280307285192	0.214993361445997	0.0178071302132338	SLC3A2	6520	solute carrier family 3 member 2
ENSG00000129925.11	41.0542835271674	0.948687554415668	0.576543638907645	0.0837327835068774	PGAP6	58986	post-glycosylphosphatidylinositol attachment to proteins 6
ENSG00000129245.12	29.1539663068347	0.948666616522092	0.365952239102192	0.0508291767852851	FXR2	9513	FMR1 autosomal homolog 2
ENSG00000005884.18	93.746655843221	0.94832250746726	0.24267063944822	0.0239814747549994	ITGA3	3675	integrin subunit alpha 3
ENSG00000120008.16	822.479308593844	0.948317582953914	0.646172116521975	0.0913553639090563	WDR11	55717	WD repeat domain 11
ENSG00000198768.11	12.7232353438147	0.947602387187312	0.624255484486791	0.0894935806464894	APCDD1L	164284	APC down-regulated 1 like
ENSG00000109501.14	327.577494633592	0.947064785286419	0.379480517689666	0.0540710563134351	WFS1	7466	wolframin ER transmembrane glycoprotein
ENSG00000110651.11	656.155216796521	0.946631547930696	0.11941682766603	0.00128238509227389	CD81	975	CD81 molecule
ENSG00000088854.12	287.122515318738	0.944937478815086	0.179224014530183	0.0101948483711336	DNAAF9	25943	dynein axonemal assembly factor 9
ENSG00000196263.8	38.5656918998793	0.944359479208553	0.295107000789273	0.0372879803587253	ZNF471	57573	zinc finger protein 471
ENSG00000185909.15	49.6113822637043	0.943139214275782	0.405149792734836	0.0597056624434341	KLHDC8B	200942	kelch domain containing 8B
ENSG00000172594.13	74.124252622989	0.942082023378729	0.200012648915378	0.0159312025061762	SMPDL3A	10924	sphingomyelin phosphodiesterase acid like 3A
ENSG00000233608.4	199.361711955148	0.94066562307717	0.141140326193378	0.00366246915004951	TWIST2	117581	twist family bHLH transcription factor 2
ENSG00000255248.9	1113.97013485447	0.939263488070272	0.130914494404989	0.00234534856576848	MIR100HG	399959	mir-100-let-7a-2-mir-125b-1 cluster host gene
ENSG00000197937.12	210.265615246699	0.938552016396384	0.262306543555529	0.0311794068332883	ZNF347	84671	zinc finger protein 347
ENSG00000280099.1	31.1807724858384	0.938266438104446	0.318318147555044	0.0436792061889316	NA	NA	NA
ENSG00000071246.11	28.3744965857002	0.937226661226482	0.326531492791563	0.0461047139866346	VASH1	22846	vasohibin 1
ENSG00000253418.1	7.05158969492292	0.935991365084448	0.74947717043945	0.102799411761726	SNX18P27	100873788	sorting nexin 18 pseudogene 27
ENSG00000196812.5	108.599902286462	0.935277661546095	0.180300044326309	0.0120951258639536	ZSCAN16	80345	zinc finger and SCAN domain containing 16
ENSG00000260230.3	6.32445575811817	0.933476601507618	0.80931211834815	0.107541888254386	FRRS1L	23732	ferric chelate reductase 1 like
ENSG00000287978.1	74.2196366764184	0.93296828993943	0.249796114878322	0.0292284553481201	LOC100996756	100996756	uncharacterized LOC100996756
ENSG00000113083.14	7004.36221924962	0.931187240677349	0.0891527943312184	0.000158159195002034	LOX	4015	lysyl oxidase
ENSG00000162512.16	370.923905341725	0.930294443614683	0.163415026112501	0.00858808926600188	SDC3	9672	syndecan 3
ENSG00000215012.9	339.806175259808	0.930170780012237	0.179648862948344	0.0127324805484508	RTL10	79680	retrotransposon Gag like 10
ENSG00000162642.14	395.212539579843	0.928816025319445	0.208018240523985	0.0202518667594546	C1orf52	148423	chromosome 1 open reading frame 52
ENSG00000115415.19	2422.82293532151	0.928571363370317	0.0900442183735915	0.000204047465033112	STAT1	6772	signal transducer and activator of transcription 1
ENSG00000119950.21	231.467564547611	0.926805774046531	0.139646726613431	0.00479335364562612	MXI1	4601	MAX interactor 1, dimerization protein
ENSG00000131242.18	17.8721493851248	0.926665439579343	0.446307425612414	0.0709222763771831	RAB11FIP4	84440	RAB11 family interacting protein 4
ENSG00000197128.11	51.7941254308631	0.925966579196226	0.389674165855106	0.0619064899254036	ZNF772	400720	zinc finger protein 772
ENSG00000122986.13	27.7525378978813	0.925414596946927	0.340641055048292	0.0519639537384294	HVCN1	84329	hydrogen voltage gated channel 1
ENSG00000259863.1	4.65652500690028	0.92529087938319	1.0015756841011	0.121086097583047	NA	NA	NA
ENSG00000135679.25	658.996464339405	0.925006657813595	0.207238612653355	0.0207308453424361	MDM2	4193	MDM2 proto-oncogene
ENSG00000118785.14	419.282096796531	0.924773989456596	0.145128430120995	0.00579618390589957	SPP1	6696	secreted phosphoprotein 1
ENSG00000256955.2	19.8986362279038	0.924122817974745	0.48822070853488	0.0781301271894099	NA	NA	NA
ENSG00000067177.15	133.698347486749	0.923411282346112	0.228778435033108	0.0257740604698823	PHKA1	5255	phosphorylase kinase regulatory subunit alpha 1
ENSG00000137504.13	105.900048916184	0.923315039198888	0.264135170542888	0.0349070415422684	CREBZF	58487	CREB/ATF bZIP transcription factor
ENSG00000196646.12	220.802382501448	0.923194126483028	0.164880920609543	0.010028701993781	ZNF136	7695	zinc finger protein 136
ENSG00000271204.1	16.3886713935247	0.922321704656762	0.497404324579981	0.0801661829679465	NA	NA	NA
ENSG00000152578.13	12.2131105691881	0.922181334642985	0.723074102839725	0.103362254430351	GRIA4	2893	glutamate ionotropic receptor AMPA type subunit 4
ENSG00000268516.2	29.8220138551474	0.920678684193037	0.370918438339639	0.0592075160203283	ZNF8-DT	105372482	ZNF8 divergent transcript
ENSG00000186976.15	7.92224692694002	0.919900237338156	0.666184261326278	0.099671811872378	EFCAB6	64800	EF-hand calcium binding domain 6
ENSG00000168067.12	40.3326162712578	0.918558625452828	0.327163432691201	0.0510181300464064	MAP4K2	5871	mitogen-activated protein kinase kinase kinase kinase 2
ENSG00000251562.8	33918.663341539	0.918466778619368	0.171912213442255	0.0128253402331545	MALAT1	378938	metastasis associated lung adenocarcinoma transcript 1
ENSG00000259661.1	127.257600831173	0.916831307320599	0.176846474170355	0.0144071760575748	NA	NA	NA
ENSG00000101236.17	681.899524315748	0.915711776037772	0.134648305549285	0.00499856177325274	RNF24	11237	ring finger protein 24
ENSG00000259946.1	4.17715228024404	0.91549712042662	1.12218169062573	0.12874655256803	NA	NA	NA
ENSG00000114023.15	847.256999056864	0.915046823964107	0.113573425151544	0.00192352451725172	FAM162A	26355	family with sequence similarity 162 member A
ENSG00000110514.19	39.4761777248594	0.915024634401365	0.50290780337378	0.0828677022343027	MADD	8567	MAP kinase activating death domain
ENSG00000206561.13	10.6620890854384	0.914777143396253	0.741539460919701	0.106525495605569	COLQ	8292	collagen like tail subunit of asymmetric acetylcholinesterase
ENSG00000109625.19	46.4765080678611	0.914447433263485	0.253178535240962	0.0343402113617306	CPZ	8532	carboxypeptidase Z
ENSG00000183668.18	1625.01301124329	0.914220042329113	0.0837768678273515	0.000168825982829613	PSG9	5678	pregnancy specific beta-1-glycoprotein 9
ENSG00000117280.13	1821.8098770057	0.913288307299894	0.15895684614477	0.0102364717357139	RAB29	8934	RAB29, member RAS oncogene family
ENSG00000185112.6	159.093858961071	0.912658752362958	0.174557033669979	0.0145067723511074	FAM43A	131583	family with sequence similarity 43 member A
ENSG00000279086.1	14.8910543320977	0.912475768664261	0.537710871951769	0.0882924758636189	NA	NA	NA
ENSG00000272323.1	7.25076384253032	0.912281535156933	0.735242439490915	0.106864147914084	TTC23L-AS1	101929704	TTC23L antisense RNA 1
ENSG00000249992.2	47.8685192747083	0.912229606492072	0.288964190674526	0.0441262252496736	TMEM158	25907	transmembrane protein 158
ENSG00000174516.15	11.8085850755221	0.911927951128853	0.52749172081767	0.0874194056240899	PELI3	246330	pellino E3 ubiquitin protein ligase family member 3
ENSG00000185972.6	28.5630386687979	0.911235165696261	0.355215608461986	0.0582079721658931	CCIN	881	calicin
ENSG00000111799.21	2827.77978360637	0.91115913390137	0.125340831749199	0.00355111769072869	COL12A1	1303	collagen type XII alpha 1 chain
ENSG00000127603.28	2228.91514411912	0.910590172578054	0.152848448893888	0.00909297719828298	MACF1	23499	microtubule actin crosslinking factor 1
ENSG00000261542.1	12.9950582006233	0.910488351310546	0.496697195431361	0.0831920142484253	NA	NA	NA
ENSG00000120278.16	27.373138034585	0.909139629477128	0.40876951335181	0.070085258421563	PLEKHG1	57480	pleckstrin homology and RhoGEF domain containing G1
ENSG00000138760.10	3364.16394036064	0.908367152608586	0.14596340292257	0.0077293794388601	SCARB2	950	scavenger receptor class B member 2
ENSG00000245857.3	7.39979503680845	0.908034563702477	0.759686921646959	0.109572742243933	GS1-24F4.2	100652791	uncharacterized LOC100652791
ENSG00000277631.5	16.3723860324404	0.907819019644072	0.449077495067172	0.0767396881625333	PGM5P3-AS1	101929127	PGM5P3 antisense RNA 1
ENSG00000163013.11	21.08600783644	0.907262485440898	0.405503655212331	0.0699813796474028	FBXO41	150726	F-box protein 41
ENSG00000118495.19	138.825480157372	0.907199588287074	0.151128979490221	0.00917170601452496	PLAGL1	5325	PLAG1 like zinc finger 1
ENSG00000257342.1	75.7086059656915	0.906916107765766	0.267525202084743	0.0401029142031298	NA	NA	NA
ENSG00000262001.1	33.8159446947917	0.906665877097997	0.354755224496031	0.0600054978761626	NA	NA	NA
ENSG00000157637.13	21.6777929855808	0.905907558774605	0.401308702096997	0.069461243403759	SLC38A10	124565	solute carrier family 38 member 10
ENSG00000228223.3	149.885319084397	0.904891197356083	0.164946167100163	0.0135327634496718	HCG11	493812	HLA complex group 11
ENSG00000283944.1	219.135016954939	0.904578322727713	0.182196488350337	0.0182024126271489	MIR4709	100616211	microRNA 4709
ENSG00000180901.11	56.948954721411	0.904110782128565	0.26797407272646	0.041400993151807	KCTD2	23510	potassium channel tetramerization domain containing 2
ENSG00000132694.18	21.4668681714021	0.903885281860141	0.617037462968287	0.0988903049345235	ARHGEF11	9826	Rho guanine nucleotide exchange factor 11
ENSG00000183723.12	154.370332848202	0.903664386973215	0.151491351561379	0.00973779272165909	CMTM4	146223	CKLF like MARVEL transmembrane domain containing 4
ENSG00000213904.9	9.24245304095816	0.903219357614041	1.11437633897378	0.130321186495854	LIPE-AS1	100996307	LIPE antisense RNA 1
ENSG00000237356.7	6.83727174039898	0.902087729619291	0.894711624307153	0.120182823609905	NA	NA	NA
ENSG00000286021.2	10.1181949829508	0.901358843517113	0.712990342292784	0.10788022366702	LINC02822	102724834	long intergenic non-protein coding RNA 2822
ENSG00000254245.2	16.4490440052792	0.901196159405604	0.453236335163642	0.0796298178757204	PCDHGA3	56112	protocadherin gamma subfamily A, 3
ENSG00000163520.14	78.9663569892722	0.900967585429828	0.445870712146288	0.0784511952816026	FBLN2	2199	fibulin 2
ENSG00000164309.15	22.606462691916	0.90090957308348	0.387542135820323	0.0684218932419103	CMYA5	202333	cardiomyopathy associated 5
ENSG00000215374.6	21.366385320165	0.900792176174732	0.43641304834173	0.0769530349151609	FAM66B	100128890	family with sequence similarity 66 member B
ENSG00000125347.14	115.185124531953	0.900506463797566	0.168832353396969	0.0154687577725213	IRF1	3659	interferon regulatory factor 1
ENSG00000188549.12	81.9846706543919	0.900047860991482	0.20210152490013	0.0241851179278241	CCDC9B	388115	coiled-coil domain containing 9B
ENSG00000260563.3	12.8630913632904	0.899289275395178	0.485130468288307	0.0853573361412936	NA	NA	NA
ENSG00000166578.10	36.5945200568107	0.899039282822188	0.389026867623241	0.069253201999174	IQCD	115811	IQ motif containing D
ENSG00000228857.2	33.0023161264712	0.898556519395294	0.334087820041298	0.0576066459677604	NA	NA	NA
ENSG00000109103.12	16.3604006333698	0.898271004827858	0.548786534946231	0.0931190494489968	UNC119	9094	unc-119 lipid binding chaperone
ENSG00000115232.14	908.61047591304	0.898115142234228	0.106619802632059	0.00200776953558605	ITGA4	3676	integrin subunit alpha 4
ENSG00000177946.6	105.738047754228	0.897986753007944	0.178721862788955	0.0185446919278867	CENPBD1	92806	CENPB DNA-binding domain containing 1
ENSG00000143774.16	99.3459803255108	0.897868787922407	0.519794253948265	0.0902595688309522	GUK1	2987	guanylate kinase 1
ENSG00000184156.17	19.7950091009773	0.897497596509144	0.420803876269206	0.0749295537794424	KCNQ3	3786	potassium voltage-gated channel subfamily Q member 3
ENSG00000116337.19	172.153894579417	0.897362934773655	0.408142397734865	0.0731275719349274	AMPD2	271	adenosine monophosphate deaminase 2
ENSG00000112619.8	14.5479769151663	0.896786773955799	0.49104581127709	0.0867669821879003	PRPH2	5961	peripherin 2
ENSG00000128602.11	17.4631905149565	0.896784822182109	0.422310938704435	0.0758866041642858	SMO	6608	smoothened, frizzled class receptor
ENSG00000129636.13	912.337337798215	0.896784051636295	0.121483807186405	0.00424652848077349	ITFG1	81533	integrin alpha FG-GAP repeat containing 1
ENSG00000174915.12	10.9840178023194	0.896730934336429	0.615965156143467	0.10089764445121	PTDSS2	81490	phosphatidylserine synthase 2
ENSG00000184708.18	142.27316113916	0.895040655621933	0.213396995011721	0.0288581050818666	EIF4ENIF1	56478	eukaryotic translation initiation factor 4E nuclear import factor 1
ENSG00000166228.9	146.347983894659	0.89493855548716	0.277227399891434	0.0462868551481512	PCBD1	5092	pterin-4 alpha-carbinolamine dehydratase 1
ENSG00000140391.15	1555.26096901463	0.894694376646023	0.0958788835128837	0.00115859518549807	TSPAN3	10099	tetraspanin 3
ENSG00000133597.11	13.2291977838223	0.893108925527225	0.564522601811416	0.0965518054935899	ADCK2	90956	aarF domain containing kinase 2
ENSG00000091039.17	1348.64659532718	0.89257329254988	0.109769290683909	0.00251092068080186	OSBPL8	114882	oxysterol binding protein like 8
ENSG00000266921.2	20.6099681394881	0.892446026119274	0.463531711512703	0.0839492156895773	ZNF230-DT	101928063	ZNF230 divergent transcript
ENSG00000172403.11	8620.43764155258	0.892118420282009	0.0737419749227041	0.000118184013416755	SYNPO2	171024	synaptopodin 2
ENSG00000139178.11	223.482801105614	0.891195479288245	0.144450752774914	0.010111766498746	C1RL	51279	complement C1r subcomponent like
ENSG00000082146.13	172.359072563814	0.89069587855708	0.176864178696585	0.0195979714164581	STRADB	55437	STE20 related adaptor beta
ENSG00000240445.4	37.4032836275771	0.890395878038256	0.397165606394318	0.0734442796880395	FOXO3B	2310	forkhead box O3B
ENSG00000159348.13	774.74613742357	0.889280300687431	0.118056539452734	0.00441832666370388	CYB5R1	51706	cytochrome b5 reductase 1
ENSG00000225393.1	6.44976011053436	0.888695971090652	0.778545378156929	0.116346636561482	NA	NA	NA
ENSG00000130723.20	89.7400891214292	0.888150263293899	0.396409965632353	0.0737615822782765	NA	NA	NA
ENSG00000186635.14	13.9571786594297	0.887675861002069	0.609015691653097	0.102575042123361	ARAP1	116985	ArfGAP with RhoGAP domain, ankyrin repeat and PH domain 1
ENSG00000205464.12	42.5340974365907	0.886844150968591	0.305907978990767	0.0555325289099601	ATP6AP1L	92270	ATPase H+ transporting accessory protein 1 like
ENSG00000105329.10	24.2406599165306	0.886163445851858	0.464618925855868	0.0861152892968602	TGFB1	7040	transforming growth factor beta 1
ENSG00000144362.12	19.5170443834413	0.885686686010246	0.400960299878629	0.0755676589198709	PHOSPHO2	493911	phosphatase, orphan 2
ENSG00000166887.15	376.647260948172	0.885398885969066	0.383271685316954	0.0728112315540825	VPS39	23339	VPS39 subunit of HOPS complex
ENSG00000230987.2	2787.41192574218	0.885050613045829	0.166319247283662	0.0178634189552923	LOC647132	647132	DExH-box helicase 29 pseudogene
ENSG00000100979.15	176.209868801256	0.884187620328731	0.219832454843916	0.0335377763623373	PLTP	5360	phospholipid transfer protein
ENSG00000110888.17	188.807727738197	0.884112836648098	0.137152648720569	0.00925115867275002	CAPRIN2	65981	caprin family member 2
ENSG00000170848.15	1062.91118315414	0.883968241565249	0.122436048088617	0.00591426308097517	PSG6	5675	pregnancy specific beta-1-glycoprotein 6
ENSG00000104365.15	109.604603354926	0.883817947348651	0.203579815760405	0.0291543996079851	IKBKB	3551	inhibitor of nuclear factor kappa B kinase subunit beta
ENSG00000090020.11	46.3456883641064	0.883650892414478	0.246342437529522	0.0419214098407565	SLC9A1	6548	solute carrier family 9 member A1
ENSG00000184206.12	68.7304918100425	0.883535948876527	0.273004693214923	0.0489543629225236	GOLGA6L4	643707	golgin A6 family like 4
ENSG00000204889.10	46.9496671643278	0.883496080170315	0.304760299805523	0.0565146572456562	KRT40	125115	keratin 40
ENSG00000120341.18	10.6582144353376	0.88338523964739	0.607154560621507	0.103024024541743	SEC16B	89866	SEC16 homolog B, endoplasmic reticulum export factor
ENSG00000198822.10	25.1819173179977	0.883314444109353	0.383554246218626	0.0732330932113789	GRM3	2913	glutamate metabotropic receptor 3
ENSG00000235652.9	39.7132133201741	0.883239288628331	0.377628632950771	0.0722860742043013	FBXO30-DT	100507557	FBXO30 divergent transcript
ENSG00000115459.18	75.7542989635542	0.882759276701539	0.273064986137909	0.0493260427848211	ELMOD3	84173	ELMO domain containing 3
ENSG00000212901.4	17.4573954599752	0.882695181974288	0.469839173258305	0.0878560505049367	KRTAP3-1	83896	keratin associated protein 3-1
ENSG00000112655.16	74.4289401603564	0.882661748382481	0.292169517758271	0.0539748358698181	PTK7	5754	protein tyrosine kinase 7 (inactive)
ENSG00000163001.11	345.176585964192	0.882373171858292	0.208096007179549	0.0312552578841754	CFAP36	112942	cilia and flagella associated protein 36
ENSG00000205930.10	14.7403229905733	0.882304566245881	0.769477523843871	0.117247287376476	NA	NA	NA
ENSG00000178301.4	7.8676879685598	0.881929788314793	0.733325953728968	0.114084883551553	AQP11	282679	aquaporin 11
ENSG00000134452.19	130.651284742259	0.881351687266019	0.447269805803476	0.0851409899462114	FBH1	84893	F-box DNA helicase 1
ENSG00000138061.12	29.1495111249893	0.879438288149247	0.350965462411456	0.0682145642582695	CYP1B1	1545	cytochrome P450 family 1 subfamily B member 1
ENSG00000040531.15	41.9958272428228	0.87910741800718	0.284089589669185	0.0531090816960992	CTNS	1497	cystinosin, lysosomal cystine transporter
ENSG00000173926.6	48.407459302536	0.877691352254034	0.314777608001088	0.0613067058857819	MARCHF3	115123	membrane associated ring-CH-type finger 3
ENSG00000078098.14	2566.69246426655	0.877423735165465	0.139577518771475	0.0114340383891157	FAP	2191	fibroblast activation protein alpha
ENSG00000088280.19	49.7914491141502	0.875767745434672	0.239164021977898	0.042617259714817	ASAP3	55616	ArfGAP with SH3 domain, ankyrin repeat and PH domain 3
ENSG00000139531.13	156.266124420137	0.875635268439051	0.192570026067526	0.0279753268494201	SUOX	6821	sulfite oxidase
ENSG00000286760.1	8.08993169274298	0.875534921657753	0.710116113781651	0.11397169151082	LOC100289495	100289495	uncharacterized LOC100289495
ENSG00000138696.11	37.2772960419338	0.874972589360896	0.40109241863745	0.0793080436317559	BMPR1B	658	bone morphogenetic protein receptor type 1B
ENSG00000022556.16	10.7985562164869	0.873774348419385	1.02516659332224	0.13201389129002	NLRP2	55655	NLR family pyrin domain containing 2
ENSG00000091879.13	23.1402931775847	0.873200704311459	0.42525121926133	0.0840575698074538	ANGPT2	285	angiopoietin 2
ENSG00000130844.18	207.434505058213	0.872603499459536	0.151052998424269	0.0163484567638505	ZNF331	55422	zinc finger protein 331
ENSG00000196114.3	6.20755968678147	0.87245371150633	0.713477684467849	0.114991257771333	NA	NA	NA
ENSG00000176658.17	99.7962567110474	0.871806054356067	0.259889170701516	0.0495120228790125	MYO1D	4642	myosin ID
ENSG00000164615.5	234.218089005304	0.871745602084908	0.127836473948519	0.00889800934803183	CAMLG	819	calcium modulating ligand
ENSG00000167191.12	106.690741829642	0.871542794277867	0.311002631659728	0.0628079864205539	GPRC5B	51704	G protein-coupled receptor class C group 5 member B
ENSG00000185567.7	450.754597730093	0.871460307363321	0.117505165475398	0.00616085017238494	AHNAK2	113146	AHNAK nucleoprotein 2
ENSG00000204427.12	131.595855692512	0.870893844117208	0.227344921961063	0.0399302135074895	ABHD16A	7920	abhydrolase domain containing 16A, phospholipase
ENSG00000281357.3	6.22499163690296	0.869293815705805	0.71391218882124	0.116684410662293	ARRDC3-AS1	100129716	ARRDC3 antisense RNA 1
ENSG00000141873.11	11.3991464925822	0.868927785621081	0.596907956049553	0.105620473835943	SLC39A3	29985	solute carrier family 39 member 3
ENSG00000189134.4	25.9841617708412	0.868847992394745	0.458414614505698	0.0908063703413871	NKAPL	222698	NFKB activating protein like
ENSG00000072609.17	24.5415425512004	0.868636683455548	0.652348513269829	0.111828126737805	CHFR	55743	checkpoint with forkhead and ring finger domains
ENSG00000154328.16	57.440353464848	0.868332385416196	0.298465104091958	0.0603059804475215	NEIL2	252969	nei like DNA glycosylase 2
ENSG00000182324.7	8.3311269095514	0.868123160658417	0.613097063043925	0.108218031977624	KCNJ14	3770	potassium inwardly rectifying channel subfamily J member 14
ENSG00000137161.17	44.0010958160754	0.868045754314513	0.315343300787074	0.0648297026013066	CNPY3	10695	canopy FGF signaling regulator 3
ENSG00000162415.7	27.9480424688592	0.867872794647069	0.345905097859399	0.0712364222578481	ZSWIM5	57643	zinc finger SWIM-type containing 5
ENSG00000198929.13	24.4965365749736	0.867081631178697	0.450194006170396	0.0901501996888092	NOS1AP	9722	nitric oxide synthase 1 adaptor protein
ENSG00000248508.8	116.15075503123	0.866801337341378	0.198762556199415	0.0325775865703364	SRP14-AS1	100131089	SRP14 antisense RNA1 (head to head)
ENSG00000105771.14	25.8189842957032	0.866755993005539	0.657770868547583	0.112615962455053	SMG9	56006	SMG9 nonsense mediated mRNA decay factor
ENSG00000086289.12	798.039622830013	0.866618222009132	0.097454158375673	0.00263997200103717	EPDR1	54749	ependymin related 1
ENSG00000133958.13	10.4996978411423	0.866068805049682	0.644110453625603	0.111940562388694	UNC79	57578	unc-79 homolog, NALCN channel complex subunit
ENSG00000006747.15	1043.67831306428	0.866037210302664	0.108090758992004	0.00510258465042242	SCIN	85477	scinderin
ENSG00000078487.17	26.0582302199488	0.865392147814489	0.614719657272331	0.108894090581728	ZCWPW1	55063	zinc finger CW-type and PWWP domain containing 1
ENSG00000115641.19	6016.7737494066	0.864968888673353	0.0756981439782771	0.000513325917776312	FHL2	2274	four and a half LIM domains 2
ENSG00000071553.17	690.444097241946	0.863428490391964	0.233431811609152	0.0447533229919245	ATP6AP1	537	ATPase H+ transporting accessory protein 1
ENSG00000271895.2	20.7887092445082	0.86331096114698	0.412692136042294	0.0857900980944618	NA	NA	NA
ENSG00000128849.10	6.31020916327747	0.86315159536569	0.772420877176489	0.122102283673487	CGNL1	84952	cingulin like 1
ENSG00000163297.17	1254.08336697367	0.862389034404198	0.168035589036364	0.0239139525234038	ANTXR2	118429	ANTXR cell adhesion molecule 2
ENSG00000234520.6	7.30765732702673	0.86180969110151	0.735316738519579	0.119504614316588	HRAT17	101928036	heart tissue-associated transcript 17
ENSG00000162849.16	60.6104599469773	0.861599204921468	0.229011126024931	0.0437687218671264	KIF26B	55083	kinesin family member 26B
ENSG00000100711.13	128.113362607	0.860429540911361	0.257270677893028	0.0526302917830228	ZFYVE21	79038	zinc finger FYVE-type containing 21
ENSG00000055163.20	230.922640089109	0.860244855256543	0.178742533691613	0.0280485226275936	CYFIP2	26999	cytoplasmic FMR1 interacting protein 2
ENSG00000151773.13	34.3863989018801	0.859615789994496	0.376250299050863	0.0803808010884049	CCDC122	160857	coiled-coil domain containing 122
ENSG00000104689.10	68.3133666041516	0.859569462814298	0.297475704645429	0.063814227381281	TNFRSF10A	8797	TNF receptor superfamily member 10a
ENSG00000054116.12	170.314071446257	0.858219242990579	0.361772247884412	0.07770196119182	TRAPPC3	27095	trafficking protein particle complex subunit 3
ENSG00000286940.1	31.9634624228811	0.857210342864151	0.307327800513187	0.066873281571803	MICB-DT	102725068	MICB divergent transcript
ENSG00000231527.7	22.3842803870846	0.85680776332459	0.522363895615832	0.102239396679274	FAM27C	100132948	family with sequence similarity 27 member C
ENSG00000148175.13	4928.85994013021	0.856519256268257	0.0667660912249872	0.000244043100219801	STOM	2040	stomatin
ENSG00000140943.17	233.569381491916	0.856374736405866	0.142583796800267	0.0173650431132962	MBTPS1	8720	membrane bound transcription factor peptidase, site 1
ENSG00000245748.1	74.4536933290766	0.856094704587226	0.22529921031824	0.0449330698444304	LOC100129931	100129931	uncharacterized LOC100129931
ENSG00000114573.10	1731.34789796679	0.855564766581555	0.0802822946252967	0.00123400255354725	ATP6V1A	523	ATPase H+ transporting V1 subunit A
ENSG00000261189.1	22.1546432837332	0.855084823491276	0.429897027728532	0.0910256112475265	NA	NA	NA
ENSG00000123570.4	14.2132435540667	0.854748518589723	0.439372342380876	0.0920150554164968	RAB9B	51209	RAB9B, member RAS oncogene family
ENSG00000055211.14	472.503756936511	0.854669158369548	0.11539843461297	0.00824563415849238	GINM1	116254	glycoprotein integral membrane 1
ENSG00000124222.22	278.111714474601	0.854228348569118	0.176900819828275	0.0296001329255056	STX16	8675	syntaxin 16
ENSG00000104290.11	12.2952149438041	0.854101849956789	0.493113130346627	0.0997832964310179	FZD3	7976	frizzled class receptor 3
ENSG00000237232.8	11.4084459158697	0.854026410636938	0.61328593744801	0.112503234326142	ZNF295-AS1	150142	ZNF295 antisense RNA 1
ENSG00000164938.14	374.40430543333	0.853827245425348	0.114753038182318	0.00820799389441138	TP53INP1	94241	tumor protein p53 inducible nuclear protein 1
ENSG00000154767.14	58.3806873451121	0.853489078879924	0.30044548692525	0.0666679394148975	XPC	7508	XPC complex subunit, DNA damage recognition and repair factor
ENSG00000158966.16	113.765816103095	0.853100637862794	0.178624927781111	0.0306498508696832	CACHD1	57685	cache domain containing 1
ENSG00000063127.16	14.9783790991972	0.853025107809469	0.856583210986027	0.129645692797802	SLC6A16	28968	solute carrier family 6 member 16
ENSG00000102409.10	149.187480657599	0.852546933929224	0.188204010002702	0.0338577678832643	BEX4	56271	brain expressed X-linked 4
ENSG00000129226.14	479.60291657957	0.851637176941425	0.156268320431163	0.0234491258617584	CD68	968	CD68 molecule
ENSG00000100077.15	76.5596459343345	0.851039857952637	0.392818141047848	0.0866583420121569	GRK3	157	G protein-coupled receptor kinase 3
ENSG00000129422.14	181.403842644927	0.850975312927653	0.23534762453523	0.0497922579943091	MTUS1	57509	microtubule associated scaffold protein 1
ENSG00000253276.3	1112.87765867826	0.850291114703661	0.105952982624737	0.00635208478673118	CCDC71L	168455	coiled-coil domain containing 71 like
ENSG00000119899.13	1306.44128900334	0.850176710770574	0.105944747504564	0.00648002104132831	SLC17A5	26503	solute carrier family 17 member 5
ENSG00000185022.12	45.9325500223976	0.85012556863088	0.258948323133581	0.0567117583029736	MAFF	23764	MAF bZIP transcription factor F
ENSG00000168884.15	17.5982821057717	0.850025539085673	0.45033706833759	0.0955537424151277	TNIP2	79155	TNFAIP3 interacting protein 2
ENSG00000166922.8	2118.1739614054	0.849993921824482	0.102209261123798	0.00564951461243554	SCG5	6447	secretogranin V
ENSG00000152926.15	49.1890118697369	0.849622941148709	0.253360961755782	0.0552391510581444	ZNF117	51351	zinc finger protein 117
ENSG00000133256.12	7.62791821742903	0.849318796274957	1.03986703016729	0.13654516290372	PDE6B	5158	phosphodiesterase 6B
ENSG00000286289.1	37.6764259957664	0.849156272744703	0.293142614337433	0.066462712734488	LOC107984270	107984270	uncharacterized LOC107984270
ENSG00000226137.5	66.1425909723555	0.848582654276254	0.258912227319221	0.0570090272339509	BAIAP2-DT	440465	BAIAP2 divergent transcript
ENSG00000215284.2	4.99380760690185	0.848498633264413	0.92336374706688	0.132917090674946	NA	NA	NA
ENSG00000167468.17	225.404575217312	0.848107300764008	0.235359206513845	0.0509236576765861	GPX4	2879	glutathione peroxidase 4
ENSG00000198695.2	8789.84048079193	0.847833542295716	0.130897603833013	0.0155712966949332	ND6	4541	NADH dehydrogenase subunit 6
ENSG00000227449.8	72.9958607819951	0.847446859599617	0.262870088073661	0.0585083797819608	FGF7P6	387628	fibroblast growth factor 7 pseudogene 6
ENSG00000287001.1	20.2695225858301	0.84680336328717	0.38527951529281	0.0869843748871183	NA	NA	NA
ENSG00000188042.8	1881.91810138802	0.846648643628632	0.0922261347668404	0.00357325701899699	ARL4C	10123	ADP ribosylation factor like GTPase 4C
ENSG00000198324.13	4.22112006257237	0.84601443290971	1.14213436372262	0.140171428949985	PHETA1	144717	PH domain containing endocytic trafficking adaptor 1
ENSG00000185339.9	205.984705538114	0.8458303183286	0.232957864872016	0.0512071655290848	TCN2	6948	transcobalamin 2
ENSG00000232653.8	37.298522769534	0.845518984039004	0.437237673549166	0.0953320880131828	GOLGA8N	643699	golgin A8 family member N
ENSG00000262406.3	1272.52501190836	0.845515453488667	0.0935638724327235	0.00412643683871914	MMP12	4321	matrix metallopeptidase 12
ENSG00000151376.16	51.8600966224515	0.845229021392272	0.283294532858557	0.065747386850623	ME3	10873	malic enzyme 3
ENSG00000287650.1	7.64884837098657	0.844893534756817	0.723710995696673	0.123455728637817	NA	NA	NA
ENSG00000130821.16	26.856612797376	0.844209772124047	0.349481846814077	0.0807044354028299	SLC6A8	6535	solute carrier family 6 member 8
ENSG00000183889.12	56.8935767371916	0.844023791892891	0.363572678268023	0.0838410059444139	NA	NA	NA
ENSG00000196867.8	41.2954899812177	0.843931630237287	0.309534326417332	0.0723911454626826	ZFP28	140612	ZFP28 zinc finger protein
ENSG00000268043.7	153.746908858303	0.843139625269577	0.319308787750201	0.0746099522475783	NBPF12	149013	NBPF member 12
ENSG00000177225.17	51.8257608560616	0.842215023346664	0.55094958726722	0.109459623449507	GATD1	347862	glutamine amidotransferase class 1 domain containing 1
ENSG00000177830.18	521.197933951012	0.841507589607081	0.196663130760006	0.0411411102785729	CHID1	66005	chitinase domain containing 1
ENSG00000233369.7	618.301166579591	0.841474033306236	0.255248857636562	0.0593072103464994	GTF2IP4	100093631	general transcription factor IIi pseudogene 4
ENSG00000172216.6	80.5054170947437	0.840375977327076	0.243764567725194	0.0564164788310056	CEBPB	1051	CCAAT enhancer binding protein beta
ENSG00000124177.15	446.42078706822	0.840270447223	0.297476289283706	0.0708174587728862	CHD6	84181	chromodomain helicase DNA binding protein 6
ENSG00000197943.10	61.8175699579179	0.839927319612738	0.421665213771282	0.0945560878806101	PLCG2	5336	phospholipase C gamma 2
ENSG00000245498.7	15.3390893019963	0.839721100906652	0.524479641848121	0.107428970751101	LOC100507283	100507283	uncharacterized LOC100507283
ENSG00000178977.3	20.1519066937552	0.839606442601122	0.434585387221602	0.0967740900460898	LINC00324	284029	long intergenic non-protein coding RNA 324
ENSG00000186577.14	43.8043356336951	0.839365971827216	0.421484036486035	0.0949997129437078	SMIM29	221491	small integral membrane protein 29
ENSG00000148926.10	1192.15528009869	0.839312618496988	0.0886017482380411	0.00361760448656014	ADM	133	adrenomedullin
ENSG00000261757.1	7.68225490637717	0.839136707165559	0.676264379651256	0.121989502539015	NA	NA	NA
ENSG00000269609.6	49.1483549225912	0.838856208802912	0.238274138282396	0.0551413340751903	C10orf95-AS1	100505761	C10orf95 antisense RNA 1
ENSG00000133250.14	14.1561014853029	0.836918406402717	0.465891950918805	0.102015545417686	ZNF414	84330	zinc finger protein 414
ENSG00000172893.15	213.571450381423	0.836913078029782	0.163725583027215	0.0310278456683317	DHCR7	1717	7-dehydrocholesterol reductase
ENSG00000082269.16	70.7409174929101	0.836844922630489	0.207978255549331	0.0467437009057341	FAM135A	57579	family with sequence similarity 135 member A
ENSG00000082014.16	68.6708363856167	0.836708805904737	0.24518553494294	0.0577065979543791	SMARCD3	6604	SWI/SNF related, matrix associated, actin dependent regulator of chromatin, subfamily d, member 3
ENSG00000156049.7	71.9442877054071	0.836356709594303	0.223580507201197	0.0521540845213965	GNA14	9630	G protein subunit alpha 14
ENSG00000255330.9	28.498977023756	0.835481593845727	0.371017937912572	0.0886204099726532	SOGA3	387104	SOGA family member 3
ENSG00000198597.9	23.4710535403663	0.834628302056249	0.422922364005955	0.097218412158546	ZNF536	9745	zinc finger protein 536
ENSG00000263293.2	12.3337540985805	0.834276762412037	0.539809961880082	0.111715601610843	EFCAB13-DT	102724508	EFCAB13 divergent transcript
ENSG00000166780.11	342.672478020061	0.834111777586361	0.149625392268682	0.0263371955901826	BMERB1	89927	bMERB domain containing 1
ENSG00000159714.11	6.1564389462905	0.833486881677973	0.750337566826816	0.128634046438032	ZDHHC1	29800	zinc finger DHHC-type containing 1
ENSG00000157796.18	192.038967969627	0.832783702901689	0.169818781316785	0.0344209890339644	WDR19	57728	WD repeat domain 19
ENSG00000166340.17	2202.56016890114	0.832355050239229	0.0968139447778714	0.00696557116515326	TPP1	1200	tripeptidyl peptidase 1
ENSG00000120306.11	2229.64195252871	0.830843058591275	0.11897548651515	0.015776729773874	CYSTM1	84418	cysteine rich transmembrane module containing 1
ENSG00000151229.13	133.243574479872	0.830215520856224	0.155949185119542	0.0303479238089473	SLC2A13	114134	solute carrier family 2 member 13
ENSG00000181381.13	324.305449002607	0.830203691771984	0.210733794022206	0.0503567002559299	DDX60L	91351	DExD/H-box 60 like
ENSG00000067066.17	784.631447550295	0.829804119101504	0.182308555621501	0.040362030082937	SP100	6672	SP100 nuclear antigen
ENSG00000227354.7	55.5801269862273	0.829737195955995	0.246200690944282	0.0625073463892989	RBM26-AS1	100505538	RBM26 antisense RNA 1
ENSG00000184216.14	99.5999699837774	0.829188697010726	0.237738286854688	0.0596060603294492	IRAK1	3654	interleukin 1 receptor associated kinase 1
ENSG00000159403.18	1144.94566836829	0.828735750091715	0.482020385278977	0.106072987269515	C1R	715	complement C1r
ENSG00000140403.12	98.4283681527336	0.828015490817367	0.224566523301131	0.0556305552856238	DNAJA4	55466	DnaJ heat shock protein family (Hsp40) member A4
ENSG00000140545.15	342.234948182666	0.827981662287854	0.147161551295168	0.02754151964768	MFGE8	4240	milk fat globule EGF and factor V/VIII domain containing
ENSG00000135506.16	222.290094965462	0.827502734586218	0.234192759716159	0.0588083237327805	OS9	10956	OS9 endoplasmic reticulum lectin
ENSG00000104435.13	232.300427554594	0.827485019293853	0.151268081816056	0.0294513227834889	STMN2	11075	stathmin 2
ENSG00000118515.11	1094.74413150241	0.826939266960111	0.0808401342926596	0.00313761771359565	SGK1	6446	serum/glucocorticoid regulated kinase 1
ENSG00000243244.6	297.722623485194	0.825009251801824	0.125229643493155	0.0200144558840495	STON1	11037	stonin 1
ENSG00000136827.12	228.555905758057	0.82471619602615	0.174906889435427	0.0396707603535441	TOR1A	1861	torsin family 1 member A
ENSG00000198429.10	86.0342365804479	0.824487456336428	0.242431923455724	0.0635109901791933	ZNF69	7620	zinc finger protein 69
ENSG00000159792.10	76.1509171665871	0.824309751168794	0.368372189298623	0.0922359475935478	PSKH1	5681	protein serine kinase H1
ENSG00000159899.14	286.870677404791	0.824239867162713	0.171169601668042	0.0383847750258661	NPR2	4882	natriuretic peptide receptor 2
ENSG00000163629.13	694.967072778951	0.822997508216455	0.122806020065541	0.0194194806266798	PTPN13	5783	protein tyrosine phosphatase non-receptor type 13
ENSG00000099203.7	34.3871046360033	0.822974512554487	0.466176022305869	0.106186207293704	TMED1	11018	transmembrane p24 trafficking protein 1
ENSG00000275023.5	126.954184660696	0.82263662422132	0.173725319812429	0.0402754371212805	MLLT6	4302	MLLT6, PHD finger containing
ENSG00000188765.7	35.3669596039852	0.822438533584971	0.303220753911202	0.0802734856293009	NA	NA	NA
ENSG00000103024.7	14.4100512645967	0.821035162570507	0.531753140760574	0.114651474252861	NME3	4832	NME/NM23 nucleoside diphosphate kinase 3
ENSG00000110318.15	50.7913021405032	0.820931896139903	0.529796426957943	0.114311441166626	CEP126	57562	centrosomal protein 126
ENSG00000088298.13	372.079907051486	0.82054654861701	0.294440950230031	0.0789864825554611	EDEM2	55741	ER degradation enhancing alpha-mannosidase like protein 2
ENSG00000114698.15	314.05221118197	0.819754506846008	0.12940433180991	0.0235143772643431	PLSCR4	57088	phospholipid scramblase 4
ENSG00000268403.2	15.1627008525329	0.819239292900485	0.466768224201645	0.108555478015346	LOC644656	644656	uncharacterized LOC644656
ENSG00000249709.8	34.4148055417437	0.818807516961743	0.3882066886833	0.0976638772098373	ZNF564	163050	zinc finger protein 564
ENSG00000133872.14	1561.13269355347	0.817321355702396	0.0673693464301139	0.00167356855172968	SARAF	51669	store-operated calcium entry associated regulatory factor
ENSG00000158828.8	1102.82335660298	0.817105010822391	0.104578343988233	0.0138196583649559	PINK1	65018	PTEN induced kinase 1
ENSG00000230204.1	12.0759785429738	0.817070869191234	0.526454672402828	0.116121302042985	NA	NA	NA
ENSG00000259607.1	7.39434780990536	0.816535532515426	0.793839887450008	0.134161632556835	NA	NA	NA
ENSG00000228288.7	11.2159236268313	0.816524000028409	0.625974278027181	0.125371228987257	PCAT6	100506696	prostate cancer associated transcript 6
ENSG00000187134.14	248.568926067349	0.815990319094375	0.125208872077524	0.0229292326821011	AKR1C1	1645	aldo-keto reductase family 1 member C1
ENSG00000189306.11	57.1955227025553	0.81593999286231	0.29510414341397	0.081028147717008	RRP7A	27341	ribosomal RNA processing 7 homolog A
ENSG00000043143.20	221.093833638391	0.815605828841421	0.16563005711107	0.0398437160162102	JADE2	23338	jade family PHD finger 2
ENSG00000258484.4	204.08046681139	0.815498625822198	0.133179685371127	0.0264076824631465	SPESP1	246777	sperm equatorial segment protein 1
ENSG00000284691.1	16.5548149736971	0.815347890905614	0.813003234980365	0.135182485257011	NA	NA	NA
ENSG00000065923.10	923.561616898127	0.814841258014344	0.121209826170578	0.0217175825771053	SLC9A7	84679	solute carrier family 9 member A7
ENSG00000197121.15	112.595789376507	0.814660290685243	0.271332315345229	0.0757803472968923	PGAP1	80055	post-GPI attachment to proteins inositol deacylase 1
ENSG00000132669.13	2069.56852198456	0.814607682646526	0.103334895250274	0.0140131137980619	RIN2	54453	Ras and Rab interactor 2
ENSG00000203706.8	14.2104743670653	0.81457518660488	0.448201133640493	0.107654709365128	NA	NA	NA
ENSG00000144426.18	518.304537450277	0.813926817130496	0.147220771641008	0.0326572349596813	NBEAL1	65065	neurobeachin like 1
ENSG00000103264.18	37.4610849752384	0.813814931483752	0.388040057099139	0.100006255442248	FBXO31	79791	F-box protein 31
ENSG00000163219.12	62.2941785255772	0.813785982908697	0.316099239412403	0.0873107681663827	ARHGAP25	9938	Rho GTPase activating protein 25
ENSG00000007545.16	11.3487387707704	0.813724774256244	0.606635147667084	0.12480887185179	CRAMP1	57585	cramped chromatin regulator homolog 1
ENSG00000126218.12	26.9870290655447	0.812482851614117	0.550937882694874	0.119843917814367	F10	2159	coagulation factor X
ENSG00000092421.16	67.455341715715	0.811948173999072	0.393598747885366	0.101455826977429	SEMA6A	57556	semaphorin 6A
ENSG00000100364.18	233.638289245973	0.811324758335689	0.165609624368245	0.0427045212611477	KIAA0930	23313	KIAA0930
ENSG00000134253.10	35.9706771535241	0.810322655146159	0.369186688274745	0.0981097443618187	TRIM45	80263	tripartite motif containing 45
ENSG00000164124.11	49.209233778988	0.809478349362199	0.42881196188311	0.10697706383924	TMEM144	55314	transmembrane protein 144
ENSG00000174640.15	1610.39333039085	0.809290518931406	0.1486303069954	0.0358833591797651	SLCO2A1	6578	solute carrier organic anion transporter family member 2A1
ENSG00000273680.1	10.3378019746443	0.809177243564383	0.628127798538638	0.127960060948349	NA	NA	NA
ENSG00000104205.15	233.365729375653	0.809155534639943	0.14116553466123	0.0323416400495483	SGK3	23678	serum/glucocorticoid regulated kinase family member 3
ENSG00000048405.10	159.186686350702	0.808978830388833	0.162256170922951	0.0424430355394238	ZNF800	168850	zinc finger protein 800
ENSG00000114331.15	726.012973300449	0.808708635728117	0.177463930773775	0.0483989594844408	ACAP2	23527	ArfGAP with coiled-coil, ankyrin repeat and PH domains 2
ENSG00000279329.1	10.3546868312195	0.805972657417087	0.54137881657437	0.121199180506973	NA	NA	NA
ENSG00000132840.10	956.427007057498	0.805952173424634	0.12669071355936	0.0274695094807816	BHMT2	23743	betaine--homocysteine S-methyltransferase 2
ENSG00000157077.14	65.592508652376	0.805614363282364	0.254949013750693	0.0759928275510352	ZFYVE9	9372	zinc finger FYVE-type containing 9
ENSG00000069966.18	221.544917896048	0.805577493918419	0.230127892835728	0.0686293738372474	GNB5	10681	G protein subunit beta 5
ENSG00000155016.18	462.898626735058	0.80505194096484	0.104372518493777	0.0176401739758481	CYP2U1	113612	cytochrome P450 family 2 subfamily U member 1
ENSG00000182700.5	188.402475098811	0.803992049282764	0.166950794796626	0.0463780914242646	IGIP	492311	IgA inducing protein
ENSG00000123106.10	214.940884254205	0.803820205633983	0.270724131463888	0.0809202377676911	CCDC91	55297	coiled-coil domain containing 91
ENSG00000164850.15	6.97855183281015	0.803762071592031	0.932180160714022	0.141646934617239	GPER1	2852	G protein-coupled estrogen receptor 1
ENSG00000046653.15	5.26212706316584	0.803516480941414	0.80645297032402	0.13846990314099	GPM6B	2824	glycoprotein M6B
ENSG00000174684.7	127.429930311229	0.802845925098112	0.186393633894986	0.0546529994197593	B4GAT1	11041	beta-1,4-glucuronyltransferase 1
ENSG00000134317.18	43.4119261129728	0.802555689924828	0.355581707066525	0.0992252060411638	GRHL1	29841	grainyhead like transcription factor 1
ENSG00000141665.13	7.41819454820072	0.802470868017665	0.677341267480305	0.13246532465786	FBXO15	201456	F-box protein 15
ENSG00000273271.1	17.8046536438182	0.802205891609681	0.429794528079372	0.110476140571867	NA	NA	NA
ENSG00000186567.13	12.8107921040303	0.802015651089719	0.498033707287545	0.118826709454299	CEACAM19	56971	CEA cell adhesion molecule 19
ENSG00000164331.10	351.664883629189	0.801799721665478	0.213581256077736	0.0655431631770856	ANKRA2	57763	ankyrin repeat family A member 2
ENSG00000224786.2	13.5882564697032	0.801745259185705	0.476295311054128	0.116796969138222	NA	NA	NA
ENSG00000135677.11	2600.69976943149	0.801668912515573	0.0973528280230089	0.0154175089831235	GNS	2799	glucosamine (N-acetyl)-6-sulfatase
ENSG00000159917.17	35.3366914435075	0.801432275547776	0.319134133002943	0.0932295075748574	ZNF235	9310	zinc finger protein 235
ENSG00000113269.14	121.768511720501	0.800956408482339	0.171755079303387	0.0498861756065065	RNF130	55819	ring finger protein 130
ENSG00000186369.10	343.627186856433	0.800815253076191	0.118666673462437	0.0254928076362909	NA	NA	NA
ENSG00000086619.14	93.31526792433	0.800803567386071	0.20008765534136	0.0615064926947142	ERO1B	56605	endoplasmic reticulum oxidoreductase 1 beta
ENSG00000198743.7	2351.39088905186	0.800662980175736	0.0938722931877314	0.0140618627102662	SLC5A3	6526	solute carrier family 5 member 3
ENSG00000230487.8	24.652583630207	0.799284554054144	0.831078544856646	0.139603938285969	PSMG3-AS1	114796	PSMG3 antisense RNA 1 (head to head)
ENSG00000135124.14	484.67574763876	0.79828869274469	0.276403218969579	0.0858983762831081	P2RX4	5025	purinergic receptor P2X 4
ENSG00000211584.14	252.024172474118	0.798170243418229	0.122950484564387	0.0290062244350307	SLC48A1	55652	solute carrier family 48 member 1
ENSG00000198393.8	58.7147014241628	0.797653358216665	0.227119438527491	0.0719711739829853	ZNF26	7574	zinc finger protein 26
ENSG00000165115.15	28.7383698512962	0.797587022176676	0.519520123707852	0.122665934104823	KIF27	55582	kinesin family member 27
ENSG00000154589.7	117.975911625006	0.797237818390694	0.196439358999193	0.0622069702220357	LY96	23643	lymphocyte antigen 96
ENSG00000229056.2	8.18614051904422	0.796137725027463	0.649169840213251	0.132578272392262	HECW2-AS1	101927482	HECW2 antisense RNA 1
ENSG00000254445.1	25.9016956984902	0.795511160762227	0.559635770002192	0.126947423476762	HSPB2-C11orf52	100528019	HSPB2-C11orf52 readthrough (NMD candidate)
ENSG00000185652.12	402.876028537171	0.794901004510524	0.194640206091539	0.0630085431388972	NTF3	4908	neurotrophin 3
ENSG00000140464.20	295.390454790023	0.794743192637238	0.121412247247134	0.0301220908601617	PML	5371	PML nuclear body scaffold
ENSG00000175274.18	36.1517716624056	0.794405303076168	0.404970086886723	0.110363354160121	TP53I11	9537	tumor protein p53 inducible protein 11
ENSG00000186716.21	60.5331906026307	0.79397591604144	0.545096127134295	0.126496896016795	BCR	613	BCR activator of RhoGEF and GTPase
ENSG00000111907.21	84.5909050141131	0.792833846167614	0.294627583291477	0.0921255472935885	TPD52L1	7164	TPD52 like 1
ENSG00000117394.23	705.407325178152	0.792432689805746	0.328479603362672	0.0991135221406378	SLC2A1	6513	solute carrier family 2 member 1
ENSG00000224945.1	45.9166934780004	0.792258048910574	0.265831586153012	0.0863323935998839	NA	NA	NA
ENSG00000244378.1	20.5668870280767	0.792220051367573	0.538441551736054	0.12660938286812	NA	NA	NA
ENSG00000133019.11	87.8784941942648	0.792087384822579	0.324736783601319	0.0987787653886334	CHRM3	1131	cholinergic receptor muscarinic 3
ENSG00000260552.1	25.5589829377572	0.790845936971349	0.411937211852709	0.113067062404375	COSMOC	101927809	cell fate and sterol metabolism associated divergent transcript of MOCOS
ENSG00000198952.8	31.7734680587621	0.790741005263252	0.397275461963935	0.111152430259942	SMG5	23381	SMG5 nonsense mediated mRNA decay factor
ENSG00000101955.15	1024.01089234833	0.790164098270373	0.111023869620276	0.0269014146443402	SRPX	8406	sushi repeat containing protein X-linked
ENSG00000154889.17	319.910261406718	0.789854826211405	0.28805965297951	0.0924565693781189	MPPE1	65258	metallophosphoesterase 1
ENSG00000248092.8	295.334725330332	0.789780680803734	0.268456152341479	0.0880742557232121	NA	NA	NA
ENSG00000178607.16	79.0495925355443	0.789257164161804	0.214459781417379	0.0726012593633368	ERN1	2081	endoplasmic reticulum to nucleus signaling 1
ENSG00000169131.13	72.4300823300764	0.789092030595348	0.227642211519696	0.0766329408320714	ZNF354A	6940	zinc finger protein 354A
ENSG00000204178.11	154.49500320916	0.788336003504691	0.199466747127605	0.0680075805378395	MACO1	55219	macoilin 1
ENSG00000182704.8	19.736901541084	0.788333750324713	0.520329910350312	0.126384378531553	TSKU	25987	tsukushi, small leucine rich proteoglycan
ENSG00000250986.1	10.2316093093833	0.787445389598077	0.567615955874878	0.130208467647318	NA	NA	NA
ENSG00000122417.15	158.19718204537	0.78663374927452	0.24038793530104	0.0818932580354247	ODF2L	57489	outer dense fiber of sperm tails 2 like
ENSG00000123595.8	888.752133738454	0.786216070998977	0.110798299249603	0.0284154019126974	RAB9A	9367	RAB9A, member RAS oncogene family
ENSG00000228436.3	31.0733684537271	0.785870923759627	0.308257924276511	0.0984442670006913	LOC105378663	105378663	uncharacterized LOC105378663
ENSG00000255389.1	12.6778179874737	0.785851523180784	0.490178676385269	0.12435863328562	NA	NA	NA
ENSG00000235501.6	24.939055123079	0.785773537868986	0.378461076192871	0.110588952023059	NA	NA	NA
ENSG00000167785.9	79.7203987136194	0.785671363599048	0.26629961476254	0.0898217329784242	ZNF558	148156	zinc finger protein 558
ENSG00000142156.15	209.939047598883	0.785470008080425	0.134474034131029	0.0418345047692187	COL6A1	1291	collagen type VI alpha 1 chain
ENSG00000260077.1	175.657459444732	0.785381552546381	0.158202974403139	0.0529173385953643	NA	NA	NA
ENSG00000196663.16	47.4275682907746	0.784543553111424	0.42724819678512	0.117924315603164	TECPR2	9895	tectonin beta-propeller repeat containing 2
ENSG00000163818.17	252.163517743765	0.784311267790827	0.21045155458161	0.0738675795446458	LZTFL1	54585	leucine zipper transcription factor like 1
ENSG00000168300.14	496.959644373434	0.783529493461837	0.152046625908913	0.0514904372286243	PCMTD1	115294	protein-L-isoaspartate (D-aspartate) O-methyltransferase domain containing 1
ENSG00000196776.16	483.675729581291	0.783451596146889	0.202396475259494	0.0718663006647947	CD47	961	CD47 molecule
ENSG00000197301.7	33.4823855837224	0.783116741810704	0.423980211947347	0.118262661214507	HMGA2-AS1	100129940	HMGA2 antisense RNA 1
ENSG00000104332.12	118.794257034375	0.783112048476836	0.199090116488138	0.0706077760604378	SFRP1	6422	secreted frizzled related protein 1
ENSG00000157514.16	140.899544939519	0.782613128008621	0.157988649430043	0.0542650825842043	TSC22D3	1831	TSC22 domain family member 3
ENSG00000165633.13	612.812765482857	0.781910324399641	0.101492783618871	0.0252835465477231	VSTM4	196740	V-set and transmembrane domain containing 4
ENSG00000157214.14	78.1830707156369	0.78165639549256	0.194622722495795	0.0701895780436763	STEAP2	261729	STEAP2 metalloreductase
ENSG00000196743.9	1729.73244919889	0.781551322204997	0.103827836257382	0.02725580446443	GM2A	2760	GM2 ganglioside activator
ENSG00000165507.9	102.076881665811	0.780636448474901	0.171656290813941	0.0623071157419173	DEPP1	11067	DEPP1 autophagy regulator
ENSG00000136040.9	18.9669149201237	0.780554166491405	0.814226852724606	0.142446207267904	PLXNC1	10154	plexin C1
ENSG00000109339.24	120.11880859963	0.780250320238091	0.201242127627965	0.0733387149972973	MAPK10	5602	mitogen-activated protein kinase 10
ENSG00000223820.5	28.8182003226838	0.779746196289133	0.356040091116856	0.109911697037735	CFL1P1	142913	cofilin 1 pseudogene 1
ENSG00000184408.10	204.999772269631	0.779434752195225	0.356321816092165	0.110137609483963	KCND2	3751	potassium voltage-gated channel subfamily D member 2
ENSG00000101624.11	55.2988483377898	0.779370732881758	0.306224627415435	0.101567782424323	CEP76	79959	centrosomal protein 76
ENSG00000213995.11	41.6132719844999	0.779330722181672	0.309494237253972	0.102351320619765	NAXD	55739	NAD(P)HX dehydratase
ENSG00000111424.12	194.909190794122	0.778716151077655	0.13716676714687	0.0468354094453931	VDR	7421	vitamin D receptor
ENSG00000112293.15	48.1912737051631	0.778329628236739	0.337538579926228	0.107315965464284	GPLD1	2822	glycosylphosphatidylinositol specific phospholipase D1
ENSG00000134909.18	36.6823355451641	0.777831366682366	0.295807281427106	0.100674696103653	ARHGAP32	9743	Rho GTPase activating protein 32
ENSG00000263335.1	10.3315019594695	0.777230895805443	0.658934701787281	0.138695893183178	NA	NA	NA
ENSG00000129158.11	131.695307483864	0.777187077641586	0.25813975292597	0.0923462788811379	SERGEF	26297	secretion regulating guanine nucleotide exchange factor
ENSG00000130340.16	341.77989153567	0.776002044448479	0.147367816192416	0.0536860138300088	SNX9	51429	sorting nexin 9
ENSG00000046651.15	229.698543483015	0.775886254545855	0.178127637050498	0.067697875019902	OFD1	8481	OFD1 centriole and centriolar satellite protein
ENSG00000164048.14	30.5337831392546	0.775820563706081	0.317020044668116	0.104943083949273	ZNF589	51385	zinc finger protein 589
ENSG00000115884.11	55.6421633828998	0.775770716679394	0.28059956487221	0.0983326132759444	SDC1	6382	syndecan 1
ENSG00000198586.14	509.082712431731	0.775359632567544	0.111827005288045	0.0350692948741321	TLK1	9874	tousled like kinase 1
ENSG00000110013.13	192.750236226296	0.77513551826089	0.209337497732551	0.0797369752341289	SIAE	54414	sialic acid acetylesterase
ENSG00000254101.7	4.06143575897931	0.774877552953187	1.13243539745325	0.14979674098078	LINC02055	107986980	long intergenic non-protein coding RNA 2055
ENSG00000178631.7	8.52220445284155	0.77486413152222	0.634616326899518	0.138244030495179	NA	NA	NA
ENSG00000136869.16	184.17332087133	0.772311072852533	0.222029641020806	0.0860066663500594	TLR4	7099	toll like receptor 4
ENSG00000084234.17	4648.41562761547	0.772169162006022	0.0885812420086369	0.0230588979374429	APLP2	334	amyloid beta precursor like protein 2
ENSG00000210194.1	178.621629817949	0.772007924699392	0.185455187028687	0.0730220210393868	NA	NA	NA
ENSG00000099785.10	39.3252104238553	0.771733674389172	0.275488583916532	0.0993369631479779	MARCHF2	51257	membrane associated ring-CH-type finger 2
ENSG00000182179.13	83.1638216155944	0.771685107605085	0.249883845370687	0.0935609701238976	UBA7	7318	ubiquitin like modifier activating enzyme 7
ENSG00000145916.19	66.1621617432712	0.771674756675905	0.31890643740047	0.108105496299608	RMND5B	64777	required for meiotic nuclear division 5 homolog B
ENSG00000109065.12	37.9457655018201	0.771472015869838	0.303057121890758	0.104491461166665	NAT9	26151	N-acetyltransferase 9 (putative)
ENSG00000220323.4	81.3769492960657	0.770828988768589	0.198430274583616	0.078665189945199	H2BC19P	337874	H2B clustered histone 19, pseudogene
ENSG00000120549.18	18.2728541396009	0.770598799972604	0.578042720942472	0.135749644169045	KIAA1217	56243	KIAA1217
ENSG00000103888.17	36531.5562659464	0.769744897745456	0.108695797670991	0.0367083175207304	CEMIP	57214	cell migration inducing hyaluronidase 1
ENSG00000155252.13	391.079507650079	0.769139155007627	0.197245220925486	0.0794152975982289	PI4K2A	55361	phosphatidylinositol 4-kinase type 2 alpha
ENSG00000139974.15	529.42762308919	0.767882827905857	0.113667268755277	0.0410545386179514	SLC38A6	145389	solute carrier family 38 member 6
ENSG00000140993.11	34.9219565559855	0.767871083285242	0.302304971855965	0.106751352825592	TIGD7	91151	tigger transposable element derived 7
ENSG00000242622.2	11.6564303132373	0.766980807923161	0.571434041978731	0.136771913820442	NA	NA	NA
ENSG00000108515.17	20.6487354923831	0.766968122992477	0.590438724072672	0.138357007766758	ENO3	2027	enolase 3
ENSG00000167107.12	61.0474548717817	0.766513756285469	0.402903041315644	0.123116893103651	ACSF2	80221	acyl-CoA synthetase family member 2
ENSG00000174928.16	84.961928656757	0.766405454075405	0.20333701076497	0.0836247396739809	C3orf33	285315	chromosome 3 open reading frame 33
ENSG00000131845.14	59.4131186584119	0.765586254319414	0.240446272725848	0.094888822174223	ZNF304	57343	zinc finger protein 304
ENSG00000224078.15	470.848900424522	0.76553091487288	0.231415162865505	0.0926770266243154	NA	NA	NA
ENSG00000185986.12	39.4291990961432	0.765135667036255	0.371574052333657	0.11973088694193	NA	NA	NA
ENSG00000203808.12	8.67476553626412	0.764949321052701	0.643177960393097	0.141192372317428	BVES-AS1	154442	BVES antisense RNA 1
ENSG00000146674.15	4355.05125565603	0.764809605407901	0.0802367627953497	0.0217800492682361	IGFBP3	3486	insulin like growth factor binding protein 3
ENSG00000283175.1	161.729700845093	0.764799489213633	0.150839046752185	0.0636120596266806	LOC101929130	101929130	uncharacterized LOC101929130
ENSG00000225972.1	700.769906765021	0.764627364001493	0.219469434448081	0.0899312910190679	MTND1P23	100887749	MT-ND1 pseudogene 23
ENSG00000151729.11	445.902956524826	0.764361988776138	0.141789173208982	0.0584083229127232	SLC25A4	291	solute carrier family 25 member 4
ENSG00000111335.12	27.2107779971719	0.764331204546868	0.372295836345735	0.120521461156642	OAS2	4939	2'-5'-oligoadenylate synthetase 2
ENSG00000115307.17	463.266702465973	0.763558615973539	0.351120629457456	0.118037102302394	AUP1	550	AUP1 lipid droplet regulating VLDL assembly factor
ENSG00000116396.14	36.7846901302397	0.763487697845962	0.37617832851994	0.121312203840303	KCNC4	3749	potassium voltage-gated channel subfamily C member 4
ENSG00000174032.17	68.2160144502525	0.762907646543518	0.299940192486443	0.109120278452383	SLC25A30	253512	solute carrier family 25 member 30
ENSG00000087086.15	787669.505247576	0.762328905294691	0.0778005767991862	0.0215307448141757	FTL	2512	ferritin light chain
ENSG00000135919.13	184.038842596647	0.762306046826724	0.191580161685103	0.0820014531601279	SERPINE2	5270	serpin family E member 2
ENSG00000188916.9	10.2277577608968	0.761782252172941	0.603540240667757	0.140057945070965	INSYN2A	642938	inhibitory synaptic factor 2A
ENSG00000000003.15	3015.9361247275	0.761406422314225	0.121511807606624	0.0502624065097967	TSPAN6	7105	tetraspanin 6
ENSG00000100439.10	1906.19631692951	0.761323381544371	0.291822926640298	0.108668408200003	ABHD4	63874	abhydrolase domain containing 4, N-acyl phospholipase B
ENSG00000173918.15	18.9239972564892	0.761073709599182	0.388243878138039	0.124696388787514	C1QTNF1	114897	C1q and TNF related 1
ENSG00000110721.12	43.5295706512042	0.760825644296039	0.265692206076998	0.103249573658215	CHKA	1119	choline kinase alpha
ENSG00000138378.19	35.9758094084319	0.760677924649206	0.386515116045815	0.124583883654723	STAT4	6775	signal transducer and activator of transcription 4
ENSG00000278989.1	8.81186132955609	0.760584774220377	0.755871000604953	0.145078310271571	NA	NA	NA
ENSG00000170949.17	141.831462537774	0.76056230839102	0.32425938145257	0.11487800347469	ZNF160	90338	zinc finger protein 160
ENSG00000179909.15	16.3143749898775	0.760210501450537	0.413883732375737	0.128409099066319	ZNF154	7710	zinc finger protein 154
ENSG00000161671.16	64.600646847946	0.760167173522348	0.352312434804793	0.119617770401127	EMC10	284361	ER membrane protein complex subunit 10
ENSG00000125633.11	283.575562634991	0.760126921624756	0.185241548138257	0.0812442717626555	CCDC93	54520	coiled-coil domain containing 93
ENSG00000197694.17	806.72474423207	0.759701339166874	0.292569032399175	0.109798767387514	SPTAN1	6709	spectrin alpha, non-erythrocytic 1
ENSG00000140285.10	6823.40764204276	0.759402203718409	0.120703628582804	0.0515848379365921	FGF7	2252	fibroblast growth factor 7
ENSG00000235437.8	331.762862881384	0.759343140190909	0.135933408818015	0.059905208152684	LINC01278	92249	long intergenic non-protein coding RNA 1278
ENSG00000142494.13	67.0658784653002	0.75880612884042	0.272511408496164	0.105846695839905	SLC47A1	55244	solute carrier family 47 member 1
ENSG00000102265.12	28733.7148758402	0.758748253842511	0.113473024557158	0.0476616296117574	TIMP1	7076	TIMP metallopeptidase inhibitor 1
ENSG00000126870.16	18.1688146163325	0.758664656651064	0.652341800181243	0.142331863547241	DYNC2I1	55112	dynein 2 intermediate chain 1
ENSG00000261799.1	69.1063434909908	0.75845708865137	0.218447570957645	0.0936714535116988	NA	NA	NA
ENSG00000159228.13	239.970963931811	0.758365279965575	0.188696186547601	0.0841659386518375	CBR1	873	carbonyl reductase 1
ENSG00000198832.10	105.218815166155	0.758166345445464	0.248949387321571	0.101791617489348	SELENOM	140606	selenoprotein M
ENSG00000204580.13	112.527454200587	0.758067330175946	0.243086565392377	0.10078608283345	DDR1	780	discoidin domain receptor tyrosine kinase 1
ENSG00000164967.10	66.6352263496453	0.757666134250397	0.355960286041361	0.121876723389089	RPP25L	138716	ribonuclease P/MRP subunit p25 like
ENSG00000243335.9	48.4080727616476	0.75726004893891	0.498063974483181	0.135522658400466	KCTD7	154881	potassium channel tetramerization domain containing 7
ENSG00000152779.14	23.3930970154588	0.756818798382015	0.437767697456156	0.131788352219661	SLC16A12	387700	solute carrier family 16 member 12
ENSG00000068305.17	236.046879415001	0.756812957205553	0.187854718393522	0.0854655014371578	MEF2A	4205	myocyte enhancer factor 2A
ENSG00000087253.13	334.587459028967	0.756284126245936	0.117306627683387	0.0518688303485001	LPCAT2	54947	lysophosphatidylcholine acyltransferase 2
ENSG00000011523.14	100.326157256135	0.755956831726132	0.208751477600801	0.0925668181329517	CEP68	23177	centrosomal protein 68
ENSG00000044446.12	35.7500751473214	0.755126933460578	0.575423989515477	0.140965613408016	PHKA2	5256	phosphorylase kinase regulatory subunit alpha 2
ENSG00000164484.11	70.5285961093784	0.754768019008242	0.216331861923611	0.0956645700954171	TMEM200A	114801	transmembrane protein 200A
ENSG00000144455.14	412.186122934353	0.753979616051002	0.136151346549308	0.0643209462791464	SUMF1	285362	sulfatase modifying factor 1
ENSG00000172824.16	19.7127701302201	0.753798325425689	0.492963132796102	0.136090964197213	CES4A	283848	carboxylesterase 4A
ENSG00000185880.13	124.003331947091	0.753491950859946	0.256029919975432	0.105733557985066	TRIM69	140691	tripartite motif containing 69
ENSG00000123096.11	306.356224241861	0.753037624247856	0.119467391282933	0.0554346728084715	SSPN	8082	sarcospan
ENSG00000175470.20	38.1010814697274	0.752902384339325	0.417832070737469	0.131563095889452	PPP2R2D	55844	protein phosphatase 2 regulatory subunit Bdelta
ENSG00000224848.2	11.0688521579132	0.751679928152316	0.532922163512752	0.139830834505885	NA	NA	NA
ENSG00000178184.16	41.212114245956	0.75136479583304	0.284089859083807	0.113632270191758	PARD6G	84552	par-6 family cell polarity regulator gamma
ENSG00000157259.8	286.871141914506	0.751140663816395	0.141678421186358	0.0695653890898506	GATAD1	57798	GATA zinc finger domain containing 1
ENSG00000081377.17	183.360586598809	0.750742967642485	0.243108335167372	0.104604440296886	CDC14B	8555	cell division cycle 14B
ENSG00000204055.4	7.53991572067035	0.750661412977041	0.660470415429162	0.144619492653043	NA	NA	NA
ENSG00000284693.1	18.3894144011766	0.750340028993355	0.521231206190624	0.139376779341674	LINC02606	100506022	long intergenic non-protein coding RNA 2606
ENSG00000277358.1	14.1477067911603	0.750135163478729	0.488100909571709	0.138018066831019	NA	NA	NA
ENSG00000166188.2	18.2463687911654	0.750083822198147	0.399956200890979	0.130660141705404	ZNF319	57567	zinc finger protein 319
ENSG00000242615.1	58.2726800783368	0.749590893514063	0.36484415555238	0.127847688543473	NA	NA	NA
ENSG00000183087.15	160.107447509353	0.74901210213735	0.204671826416141	0.0964409192109019	GAS6	2621	growth arrest specific 6
ENSG00000170485.17	61.6033524360089	0.748632985178851	0.217409998823892	0.100563218690696	NPAS2	4862	neuronal PAS domain protein 2
ENSG00000231426.7	248.949186524921	0.748584748861446	0.127919152968619	0.0647280754558745	FILNC1	100132735	FOXO induced long non-coding RNA 1
ENSG00000288095.1	6.53484128746866	0.748485437269567	0.688593185128076	0.14588108663322	NA	NA	NA
ENSG00000064393.16	141.752344748301	0.748305405903635	0.16291706775771	0.0816767079818032	HIPK2	28996	homeodomain interacting protein kinase 2
ENSG00000091157.13	86.7314126007549	0.747488530866523	0.197097258995405	0.0951105997891802	WDR7	23335	WD repeat domain 7
ENSG00000136156.15	1769.0203229501	0.746985250670334	0.118410832331908	0.0601056970175102	ITM2B	9445	integral membrane protein 2B
ENSG00000198786.2	13532.4544538943	0.746703406221991	0.0897290644956004	0.0409678938917419	ND5	4540	NADH dehydrogenase subunit 5
ENSG00000286104.1	20.4559988624215	0.746609014262335	0.609884296080197	0.143932238376588	NA	NA	NA
ENSG00000088543.15	42.056024529319	0.746505095734916	0.278996163341011	0.116233999208611	C3orf18	51161	chromosome 3 open reading frame 18
ENSG00000151687.14	37.1900784492584	0.746338929174547	0.574531978420774	0.14290324107011	ANKAR	150709	ankyrin and armadillo repeat containing
ENSG00000114796.16	373.29039275906	0.746266534286035	0.175907420302642	0.0893843949324735	KLHL24	54800	kelch like family member 24
ENSG00000282057.1	180.733776000725	0.745732189106221	0.159897128257115	0.0830837326983312	NA	NA	NA
ENSG00000042445.14	241.758036022546	0.745706918925949	0.337269347221019	0.126271808917445	RETSAT	54884	retinol saturase
ENSG00000137509.11	3645.44457416658	0.745392067329312	0.108600367620065	0.0550434864913988	PRCP	5547	prolylcarboxypeptidase
ENSG00000154620.6	10.4151434515594	0.744415672666849	0.594972569743848	0.144046767898586	TMSB4Y	9087	thymosin beta 4 Y-linked
ENSG00000123395.14	82.4303165863855	0.744398572022865	0.220134666341393	0.10347505173293	ATG101	60673	autophagy related 101
ENSG00000167291.16	126.899193815529	0.744257582834726	0.167990439875471	0.0876378290561193	TBC1D16	125058	TBC1 domain family member 16
ENSG00000181817.6	378.652014107561	0.744124953582625	0.123446199209631	0.0663600486005395	LSM10	84967	LSM10, U7 small nuclear RNA associated
ENSG00000280347.1	19.0717707946068	0.744016706473908	0.382074865552073	0.132126787308682	NA	NA	NA
ENSG00000258102.5	10.5451541199919	0.743406343273505	0.53229300672822	0.141874909202582	MAP1LC3B2	643246	microtubule associated protein 1 light chain 3 beta 2
ENSG00000232527.8	135.217151548948	0.742527157116948	0.392867861368883	0.133482257514991	LSP1P5	645166	LSP1 pseudogene 5
ENSG00000083937.9	492.153711557961	0.74190561138148	0.0993576724135073	0.0525347853606706	CHMP2B	25978	charged multivesicular body protein 2B
ENSG00000104880.18	9.85983174112988	0.74141934536317	0.583886056417433	0.144504881030605	ARHGEF18	23370	Rho/Rac guanine nucleotide exchange factor 18
ENSG00000247679.3	10.0436312763183	0.741176835930934	0.593206719592085	0.144848900722511	NA	NA	NA
ENSG00000261997.1	8.25578609220196	0.740288864441129	0.607891156584424	0.14576618409292	NA	NA	NA
ENSG00000106733.21	124.095610449633	0.740163384601915	0.209719344208959	0.103926129645886	NMRK1	54981	nicotinamide riboside kinase 1
ENSG00000167123.19	56.7279307501489	0.73887925689811	0.273085506127266	0.120069863346105	CERCAM	51148	cerebral endothelial cell adhesion molecule
ENSG00000142065.14	53.9987963080171	0.738862965704188	0.291281261080028	0.123342769896218	ZFP14	57677	ZFP14 zinc finger protein
ENSG00000117335.19	4701.55080438619	0.738705581103176	0.109498843251824	0.0632092866885965	CD46	4179	CD46 molecule
ENSG00000100360.15	35.410789017188	0.738094494493612	0.295510846929334	0.125146191972054	IFT27	11020	intraflagellar transport 27
ENSG00000163827.13	312.415216331132	0.737864654843399	0.172818275865849	0.0946670961914012	LRRC2	79442	leucine rich repeat containing 2
ENSG00000198157.11	108.339085551336	0.737758423566811	0.206963447284377	0.105281665989177	HMGN5	79366	high mobility group nucleosome binding domain 5
ENSG00000276291.5	121.664957497152	0.737731814842216	0.170775977010314	0.0944449881478573	NA	NA	NA
ENSG00000175984.15	28.1672937940842	0.73744093406851	0.319169672913469	0.128971508503914	DENND2C	163259	DENN domain containing 2C
ENSG00000076716.9	29.0355916078127	0.73695173692235	0.34784616693516	0.132352453296667	GPC4	2239	glypican 4
ENSG00000135951.16	19.8738287304307	0.73664420269855	0.495123520531383	0.142217590857548	TSGA10	80705	testis specific 10
ENSG00000164306.11	139.901995898057	0.735589952971715	0.243100903205378	0.116909554493366	PRIMPOL	201973	primase and DNA directed polymerase
ENSG00000154898.15	10.6350373368476	0.735390083403826	0.750867132992005	0.150719942994662	NA	NA	NA
ENSG00000177663.14	42.5597641692036	0.735113652122517	0.285500714179936	0.125483682221794	IL17RA	23765	interleukin 17 receptor A
ENSG00000126351.12	19.0239016291737	0.735061996874689	0.391628659443529	0.136998661552905	THRA	7067	thyroid hormone receptor alpha
ENSG00000111261.14	155.404682669493	0.734905749574983	0.214052199651594	0.109685771699853	MANSC1	54682	MANSC domain containing 1
ENSG00000115295.20	508.694276918209	0.733465228185688	0.115473217383738	0.0717613398501944	CLIP4	79745	CAP-Gly domain containing linker protein family member 4
ENSG00000179598.6	53.8179730506666	0.733326850658226	0.256495812046269	0.120973108625539	PLD6	201164	phospholipase D family member 6
ENSG00000119979.18	1876.5741482605	0.73316665983582	0.149506972359372	0.0905874440001591	DENND10	404636	DENN domain containing 10
ENSG00000211448.12	391.004461386489	0.732963089476376	0.229127975228694	0.115104429430703	DIO2	1734	iodothyronine deiodinase 2
ENSG00000134152.11	387.208553286619	0.73292775222664	0.155937173118007	0.0928979335364706	KATNBL1	79768	katanin regulatory subunit B1 like 1
ENSG00000140092.14	4932.19693739993	0.732714600508672	0.0956926222251783	0.0583081960429091	FBLN5	10516	fibulin 5
ENSG00000087157.19	29.3222126582929	0.732308317328612	0.41542579398033	0.139944420759694	PGS1	9489	phosphatidylglycerophosphate synthase 1
ENSG00000010295.19	28.8983493097939	0.731989202176509	0.373975374714824	0.137111920709473	IFFO1	25900	intermediate filament family orphan 1
ENSG00000126106.14	32.0924545364474	0.731681036638389	0.466637310272746	0.142789038439848	TMEM53	79639	transmembrane protein 53
ENSG00000102401.20	850.914673180746	0.731588860176104	0.190161236739343	0.105507368487878	ARMCX3	51566	armadillo repeat containing X-linked 3
ENSG00000112697.17	2371.22622263813	0.731508915889038	0.0804422111673466	0.0481214088967888	TMEM30A	55754	transmembrane protein 30A
ENSG00000163257.11	241.331009793783	0.731287119581761	0.131390718387506	0.0834085017155673	DCAF16	54876	DDB1 and CUL4 associated factor 16
ENSG00000269994.3	11.5068759375005	0.73124572792043	0.666866041326299	0.149681346745893	LINC02893	440173	long intergenic non-protein coding RNA 2893
ENSG00000215190.9	48.625161805984	0.73095317864801	0.291815733863727	0.129420813721282	GUSBP1	728411	GUSB pseudogene 1
ENSG00000120690.16	509.987374697096	0.72969483791985	0.130857315312608	0.0852491895570973	ELF1	1997	E74 like ETS transcription factor 1
ENSG00000233276.5	160.319012630841	0.729662507089544	0.255220464064764	0.123568640593524	GPX1	2876	glutathione peroxidase 1
ENSG00000170954.11	300.598563787428	0.729415006269601	0.167361015510661	0.101009112054052	ZNF415	55786	zinc finger protein 415
ENSG00000134686.18	151.386164852194	0.729218141872121	0.209040077674392	0.113293193516579	PHC2	1912	polyhomeotic homolog 2
ENSG00000235703.6	13.2283704868792	0.728721755456026	0.784589333214084	0.154394042185424	LINC00894	100272228	long intergenic non-protein coding RNA 894
ENSG00000125378.16	59.2272600976446	0.728104369603442	0.391908084652828	0.140284949743109	BMP4	652	bone morphogenetic protein 4
ENSG00000077585.14	237.812529495302	0.728061201630611	0.174876145088122	0.103813278782837	GPR137B	7107	G protein-coupled receptor 137B
ENSG00000257181.1	37.84247136168	0.727887431454742	0.29537708963543	0.131337607582851	NA	NA	NA
ENSG00000198920.11	139.854354968422	0.727864421452864	0.220299902627939	0.117585753406147	KIAA0753	9851	KIAA0753
ENSG00000271533.1	7.03800595693315	0.727478410992948	0.668213526448782	0.151065601939784	NA	NA	NA
ENSG00000154917.11	73.9099224090011	0.727044623894119	0.199273012364904	0.112954225963853	RAB6B	51560	RAB6B, member RAS oncogene family
ENSG00000097096.9	45.9759662801295	0.726455548296192	0.277250899669037	0.129983067038793	SYDE2	84144	synapse defective Rho GTPase homolog 2
ENSG00000099308.10	95.3346314030449	0.726233100233458	0.218212477027605	0.118713955099578	MAST3	23031	microtubule associated serine/threonine kinase 3
ENSG00000137331.12	110.852034288985	0.72538977433	0.23316986789274	0.123003845599221	IER3	8870	immediate early response 3
ENSG00000156414.19	17.2552007716053	0.725057673612293	0.409106830061241	0.142103253137892	TDRD9	122402	tudor domain containing 9
ENSG00000138835.22	26.7876964822243	0.72502476038862	0.322904182795543	0.1356361592721	RGS3	5998	regulator of G protein signaling 3
ENSG00000153113.23	4116.43685561278	0.724823974813859	0.0895029005883679	0.0639153703102014	CAST	831	calpastatin
ENSG00000156928.5	27.869137276392	0.723581787428019	0.33195384699098	0.137678573587401	MALSU1	115416	mitochondrial assembly of ribosomal large subunit 1
ENSG00000284240.1	6.24881737283071	0.723107367599101	0.789495213370033	0.156223053925164	LINC02801	101927844	long intergenic non-protein coding RNA 2801
ENSG00000181523.13	32.3763035369594	0.722582726194501	0.611741570163327	0.150835216207967	SGSH	6448	N-sulfoglucosamine sulfohydrolase
ENSG00000157426.14	203.161397295605	0.721661443148991	0.310978527286063	0.136318190601725	AASDH	132949	aminoadipate-semialdehyde dehydrogenase
ENSG00000130165.10	77.013648618766	0.721547765705827	0.445960368838364	0.145422160166661	ELOF1	84337	elongation factor 1 homolog
ENSG00000150593.18	424.015439933942	0.721386771583343	0.121389105476108	0.0896029086641687	PDCD4	27250	programmed cell death 4
ENSG00000262468.6	17.7036983951429	0.721231535732025	0.713928014218522	0.155080743819175	NA	NA	NA
ENSG00000272077.1	10.6385723387566	0.720975705588234	0.608152656957523	0.15187042313083	NA	NA	NA
ENSG00000238168.5	4.200444252912	0.720901284764241	0.845402644779086	0.157935504101548	NA	NA	NA
ENSG00000215908.10	14.3605302789929	0.720009031649798	0.478804461391892	0.146915665477238	CROCCP2	84809	CROCC pseudogene 2
ENSG00000285219.2	37.5251458300278	0.719384480788846	0.344979360097806	0.141305726277236	LOC100506207	100506207	uncharacterized LOC100506207
ENSG00000132429.10	83.2115660616618	0.719111283885407	0.274219269650068	0.134048307637389	POPDC3	64208	popeye domain containing 3
ENSG00000137628.17	179.19087300956	0.719063068695237	0.233305759217493	0.128521519225613	DDX60	55601	DExD/H-box helicase 60
ENSG00000168734.14	642.123124349909	0.718669518977805	0.161223241037402	0.109007173888537	PKIG	11142	cAMP-dependent protein kinase inhibitor gamma
ENSG00000196549.10	1238.49413921915	0.718388215816021	0.171862174437697	0.113180065674374	MME	4311	membrane metalloendopeptidase
ENSG00000263400.8	21.8627544660438	0.718051794221388	0.380080471811281	0.143474508583847	TMEM220-AS1	101101775	TMEM220 antisense RNA 1
ENSG00000198399.14	295.794723751379	0.717435590310656	0.351814496479031	0.141989016299311	ITSN2	50618	intersectin 2
ENSG00000277075.2	8.41959871471401	0.717377888039553	0.566054565845437	0.151640710368803	H2AC8	3012	H2A clustered histone 8
ENSG00000187193.9	71.3717351837366	0.71686391637895	0.240306462934709	0.1308861460254	MT1X	4501	metallothionein 1X
ENSG00000215252.11	226.959215443245	0.716489298666771	0.204122101786855	0.124471297260462	GOLGA8B	440270	golgin A8 family member B
ENSG00000110536.14	196.36992265168	0.716383420686768	0.196610249735757	0.122778600684087	PTPMT1	114971	protein tyrosine phosphatase mitochondrial 1
ENSG00000171425.10	16.3000652771021	0.716081256418283	0.416413768120039	0.145995972800056	ZNF581	51545	zinc finger protein 581
ENSG00000165943.5	191.480821825127	0.714490923323611	0.144612745800298	0.107992894386741	MOAP1	64112	modulator of apoptosis 1
ENSG00000246695.8	247.708771661912	0.714458087628954	0.269990879747766	0.136204620978513	NA	NA	NA
ENSG00000261759.1	154.072029176442	0.713908456555356	0.226004585637259	0.130773184205818	NA	NA	NA
ENSG00000132321.17	76.1126784105675	0.713850818188248	0.207481947994293	0.128184697782926	IQCA1	79781	IQ motif containing with AAA domain 1
ENSG00000100284.21	24.200451589965	0.713850567254778	0.4651581053779	0.149220463343795	TOM1	10043	target of myb1 membrane trafficking protein
ENSG00000124587.14	34.7153998541187	0.713832525855322	0.591223029329333	0.154050557554758	PEX6	5190	peroxisomal biogenesis factor 6
ENSG00000154548.9	9.94763071112794	0.71342736403192	0.678511166501223	0.156679941332893	SRSF12	135295	serine and arginine rich splicing factor 12
ENSG00000137817.17	144.549367433979	0.713061782085501	0.270258615564523	0.13779181535523	PARP6	56965	poly(ADP-ribose) polymerase family member 6
ENSG00000279453.1	113.148319031068	0.712482945609676	0.158667269842195	0.115330702186475	NA	NA	NA
ENSG00000105223.20	30.2896401476353	0.712311105058747	0.398987403175006	0.146685373055078	PLD3	23646	phospholipase D family member 3
ENSG00000122035.6	66.0851113559783	0.711977454283131	0.336906926685243	0.143588878741433	RASL11A	387496	RAS like family 11 member A
ENSG00000103994.17	957.739579521791	0.711854146826767	0.216838163328643	0.131111972475674	ZNF106	64397	zinc finger protein 106
ENSG00000169871.13	634.515653007625	0.711782973759294	0.0931909303832849	0.084924492770433	TRIM56	81844	tripartite motif containing 56
ENSG00000205978.6	67.1642972616368	0.711660693336527	0.208959719300227	0.130095693810578	NYNRIN	57523	NYN domain and retroviral integrase containing
ENSG00000107537.14	646.054868066053	0.710669185003105	0.117987110378235	0.101343987380745	PHYH	5264	phytanoyl-CoA 2-hydroxylase
ENSG00000141084.11	40.1798331236263	0.710466878059643	0.338335783783426	0.144390300142502	RANBP10	57610	RAN binding protein 10
ENSG00000126768.12	53.8559227425138	0.709289362991876	0.62914438845402	0.157136629077279	TIMM17B	10245	translocase of inner mitochondrial membrane 17B
ENSG00000072422.17	438.914050534674	0.709273276903927	0.110284911938716	0.0990018438041934	RHOBTB1	9886	Rho related BTB domain containing 1
ENSG00000064999.15	93.939869518367	0.708909378139583	0.230096202707493	0.135295878486031	ANKS1A	23294	ankyrin repeat and sterile alpha motif domain containing 1A
ENSG00000151065.14	50.9128114627214	0.708905646445321	0.301930644042737	0.142674826810301	DCP1B	196513	decapping mRNA 1B
ENSG00000115419.13	1854.30586987341	0.708843581241707	0.146342109637847	0.115556925220106	GLS	2744	glutaminase
ENSG00000169213.7	6724.82217422295	0.70857175208452	0.0682252511550622	0.0679042881285516	RAB3B	5865	RAB3B, member RAS oncogene family
ENSG00000167792.13	69.2739311159654	0.708182982386522	0.388033969007437	0.147607723693244	NDUFV1	4723	NADH:ubiquinone oxidoreductase core subunit V1
ENSG00000136603.14	284.163134265418	0.708139435264035	0.207540396585867	0.132804046151392	SKIL	6498	SKI like proto-oncogene
ENSG00000249464.6	7.55689417605819	0.707762144582722	0.67658132319201	0.15907378490635	LINC01091	285419	long intergenic non-protein coding RNA 1091
ENSG00000165322.18	255.907082829328	0.707604293384849	0.125702137904028	0.108781274585204	ARHGAP12	94134	Rho GTPase activating protein 12
ENSG00000162616.9	1133.59133785903	0.707319786291851	0.128552840475717	0.110701698376669	DNAJB4	11080	DnaJ heat shock protein family (Hsp40) member B4
ENSG00000163683.12	1935.20373035087	0.707301250720971	0.146838521052296	0.118149881790644	SMIM14	201895	small integral membrane protein 14
ENSG00000175727.14	252.772579750614	0.706872977772729	0.143787358065971	0.117472796834416	MLXIP	22877	MLX interacting protein
ENSG00000172831.13	64.927215550182	0.706519741423479	0.305668328311276	0.144275784463734	CES2	8824	carboxylesterase 2
ENSG00000172890.13	188.22853966751	0.706271398776662	0.26804730223071	0.141760743026373	NADSYN1	55191	NAD synthetase 1
ENSG00000187372.11	5.42823933451382	0.706224001128418	0.724797329444657	0.160324869015167	PCDHB13	56123	protocadherin beta 13
ENSG00000090530.10	562.434688984675	0.705816613132497	0.170087252406356	0.127397769868038	P3H2	55214	prolyl 3-hydroxylase 2
ENSG00000283977.1	33.2857065798348	0.705811173868214	0.314228289099301	0.145307504054627	NA	NA	NA
ENSG00000156873.16	127.075946528716	0.705647004150881	0.426706224636527	0.150950446871526	PHKG2	5261	phosphorylase kinase catalytic subunit gamma 2
ENSG00000177239.15	39.4473976942657	0.705230179470139	0.665930725578029	0.159528735047352	MAN1B1	11253	mannosidase alpha class 1B member 1
ENSG00000112304.11	722.204366467526	0.705065670548218	0.121556428909917	0.110927056151189	ACOT13	55856	acyl-CoA thioesterase 13
ENSG00000245522.2	17.4725487716607	0.704982830323781	0.4404170673544	0.152214970263618	LINC02709	440028	long intergenic non-protein coding RNA 2709
ENSG00000119946.11	202.298220144615	0.703384349585832	0.125551431357613	0.114538209947396	CNNM1	26507	cyclin and CBS domain divalent metal cation transport mediator 1
ENSG00000063854.13	34.5631935821521	0.703155690034364	0.388067619172142	0.150143039364299	HAGH	3029	hydroxyacylglutathione hydrolase
ENSG00000182749.5	139.67219058408	0.702856600877769	0.165319554355335	0.129758099079562	PAQR7	164091	progestin and adipoQ receptor family member 7
ENSG00000272970.3	25.0705917175356	0.702595981424087	0.381395875256179	0.150027593887101	LOC107986163	107986163	uncharacterized LOC107986163
ENSG00000178971.16	55.6541636930134	0.702103582209384	0.491170013567253	0.156108843568486	CTC1	80169	CST telomere replication complex component 1
ENSG00000242861.1	10.3718971348666	0.701910788948855	0.559705393588016	0.158391150399007	NA	NA	NA
ENSG00000214717.12	108.938119777656	0.701875568318643	0.26932689812137	0.144161304231014	ZBED1	9189	zinc finger BED-type containing 1
ENSG00000188868.14	34.0574781628018	0.701656692530044	0.338099500741337	0.148644855001652	ZNF563	147837	zinc finger protein 563
ENSG00000162777.17	91.1809053127706	0.701389905296628	0.221534622950768	0.140511869330423	DENND2D	79961	DENN domain containing 2D
ENSG00000121413.12	35.3144205279152	0.70006542125457	0.304629155237709	0.147261446239342	ZSCAN18	65982	zinc finger and SCAN domain containing 18
ENSG00000102362.15	64.8209722523528	0.69971108246604	0.296757286853381	0.147030909030066	SYTL4	94121	synaptotagmin like 4
ENSG00000196361.10	31.5560107720141	0.699493332513574	0.354794547470052	0.150489248241738	ELAVL3	1995	ELAV like RNA binding protein 3
ENSG00000164220.7	208.547156984235	0.699483032968148	0.142821258567707	0.127622706510302	F2RL2	2151	coagulation factor II thrombin receptor like 2
ENSG00000285881.1	7.54028386484582	0.699266949409881	0.654906581232915	0.161348293335217	NA	NA	NA
ENSG00000108679.13	695.857201997599	0.699244902729775	0.189278419281011	0.137904982039826	LGALS3BP	3959	galectin 3 binding protein
ENSG00000164168.8	310.034541164465	0.698633012031592	0.203192646326238	0.140398419350237	TMEM184C	55751	transmembrane protein 184C
ENSG00000156983.16	21.6798818050333	0.698405230998104	0.397157521655951	0.154165106161915	BRPF1	7862	bromodomain and PHD finger containing 1
ENSG00000068001.14	12.0527493528171	0.69828361245925	0.510233139191997	0.158732554048956	HYAL2	8692	hyaluronidase 2
ENSG00000187955.12	23.6543356548789	0.698108639222241	0.387932837799383	0.153821391158758	COL14A1	7373	collagen type XIV alpha 1 chain
ENSG00000161544.10	13.8247677032833	0.697734091250956	0.469824199806708	0.157479084652	CYGB	114757	cytoglobin
ENSG00000228623.6	56.6477908059297	0.69771687663626	0.264470185406966	0.146455362961329	NA	NA	NA
ENSG00000122729.19	336.340889465201	0.697633697109497	0.107155467647577	0.115669945902622	ACO1	48	aconitase 1
ENSG00000117868.17	276.136135946769	0.697443798494594	0.178745617236157	0.138131065493541	ESYT2	57488	extended synaptotagmin 2
ENSG00000166165.13	15.7159029119123	0.697138999156129	0.50056316211024	0.159187417152039	CKB	1152	creatine kinase B
ENSG00000280383.1	18.1139128563752	0.6966359498193	0.461437483535146	0.157707389228639	NA	NA	NA
ENSG00000196220.16	11.9871110841233	0.696585211218538	0.921369309379153	0.164534925514156	SRGAP3	9901	SLIT-ROBO Rho GTPase activating protein 3
ENSG00000171574.18	53.2882041912995	0.696158251859261	0.271819330921948	0.147376869048391	ZNF584	201514	zinc finger protein 584
ENSG00000197776.8	37.5070404003249	0.696136294741043	0.452610237835204	0.157593267413684	KLHDC1	122773	kelch domain containing 1
ENSG00000246090.7	17.8457312554185	0.695412924175417	0.448769548108862	0.15816340744808	LOC100507053	100507053	uncharacterized LOC100507053
ENSG00000164733.21	25306.400238325	0.695410060764941	0.185060421916306	0.140852196189927	CTSB	1508	cathepsin B
ENSG00000145416.13	16.6657117082377	0.695261775839227	0.540697394468805	0.160552518329246	MARCHF1	55016	membrane associated ring-CH-type finger 1
ENSG00000147872.10	8174.56139133735	0.695204218433889	0.0647769945843611	0.0912455397978685	PLIN2	123	perilipin 2
ENSG00000287555.1	10.8627004746458	0.695019628110159	0.536280127842023	0.160666227457535	NA	NA	NA
ENSG00000261324.2	8.54615330655585	0.69501344465701	0.611059547218942	0.161916786359583	NA	NA	NA
ENSG00000122678.17	37.2374128597475	0.694666249229576	0.284378572948157	0.149566025484453	POLM	27434	DNA polymerase mu
ENSG00000286797.1	21.8805535484092	0.694480073777578	0.355039262569033	0.154623020248364	NA	NA	NA
ENSG00000170265.12	11.0862735506466	0.694328880410164	0.668254171696413	0.162827530051763	ZNF282	8427	zinc finger protein 282
ENSG00000163930.10	56.7011734928704	0.693827144527524	0.327604712102495	0.153247790751519	BAP1	8314	BRCA1 associated protein 1
ENSG00000257732.1	125.879272894067	0.6934150348578	0.198489739644952	0.143703225439577	NA	NA	NA
ENSG00000103043.15	16.5377332293986	0.692807090188411	0.446506132583657	0.159414947478751	VAC14	55697	VAC14 component of PIKFYVE complex
ENSG00000101856.10	1034.43160826234	0.692767827408137	0.101013217560826	0.121763878927217	PGRMC1	10857	progesterone receptor membrane component 1
ENSG00000151743.11	694.415702242123	0.692690054221791	0.139872844333288	0.135069054359737	AMN1	196394	antagonist of mitotic exit network 1 homolog
ENSG00000050165.18	3202.8647323129	0.692515781621976	0.107458394696483	0.125596220691325	DKK3	27122	dickkopf WNT signaling pathway inhibitor 3
ENSG00000286169.1	111.554127576421	0.692402423164101	0.298991301705266	0.152788827443774	NA	NA	NA
ENSG00000197584.12	120.477406925113	0.692166485894612	0.239268129600705	0.147953753917761	KCNMB2	10242	potassium calcium-activated channel subfamily M regulatory beta subunit 2
ENSG00000102312.22	16.8772876909416	0.692052689247924	0.478869759509622	0.160438730967927	PORCN	64840	porcupine O-acyltransferase
ENSG00000138356.14	463.210680172904	0.691972784303926	0.155843597840068	0.139149495151687	AOX1	316	aldehyde oxidase 1
ENSG00000111859.17	781.476088154003	0.691893875833646	0.107811446255801	0.126722037059589	NEDD9	4739	neural precursor cell expressed, developmentally down-regulated 9
ENSG00000126091.20	42.291599696501	0.690920782561956	0.323760302409664	0.155651879616657	ST3GAL3	6487	ST3 beta-galactoside alpha-2,3-sialyltransferase 3
ENSG00000125124.12	442.883120341513	0.690790490409352	0.145735732633417	0.139035757880795	BBS2	583	Bardet-Biedl syndrome 2
ENSG00000174718.12	168.600818908841	0.690299723593162	0.258003961453407	0.151180701528142	RESF1	55196	retroelement silencing factor 1
ENSG00000130312.6	51.0467834859037	0.69007316368586	0.227959228628984	0.148990393188644	MRPL34	64981	mitochondrial ribosomal protein L34
ENSG00000198246.9	87.1183980069329	0.689879824977033	0.415242536146211	0.160097433252411	SLC29A3	55315	solute carrier family 29 member 3
ENSG00000115904.13	267.661740666642	0.689735934314347	0.147268484417026	0.140738747636589	SOS1	6654	SOS Ras/Rac guanine nucleotide exchange factor 1
ENSG00000134030.14	37.8502164944036	0.68968408520926	0.709579858415299	0.164762345290176	CTIF	9811	cap binding complex dependent translation initiation factor
ENSG00000248923.1	30.9066832809624	0.68964652119768	0.335747628002068	0.156908364630237	MTND5P11	100506169	MT-ND5 pseudogene 11
ENSG00000163159.13	49.3204197675278	0.689300145789955	0.275363895092549	0.153477363265077	VPS72	6944	vacuolar protein sorting 72 homolog
ENSG00000100321.15	225.06090442779	0.688969886602902	0.353963384630539	0.158618752806739	SYNGR1	9145	synaptogyrin 1
ENSG00000185033.14	16.3231011271842	0.688692771114073	0.531709613375087	0.162941244040121	SEMA4B	10509	semaphorin 4B
ENSG00000255521.2	4.24253662158817	0.688600380403715	0.913937354050846	0.166692615909277	LOC100507144	100507144	uncharacterized LOC100507144
ENSG00000260083.2	31.475097631486	0.688442902456854	0.386416250314119	0.159983723666572	MIR762HG	101928736	MIR762 host gene
ENSG00000223722.3	7.66510289816291	0.688181152680854	0.597036627525534	0.163852200809697	NA	NA	NA
ENSG00000168434.13	131.54746862306	0.687627371810099	0.205586734597003	0.149335453745913	COG7	91949	component of oligomeric golgi complex 7
ENSG00000143748.18	311.943152397337	0.687599915220937	0.239096453950005	0.152329831274849	NVL	4931	nuclear VCP like
ENSG00000063761.16	114.539527757871	0.687442866168832	0.231487696050905	0.151985222984159	ADCK1	57143	aarF domain containing kinase 1
ENSG00000251474.6	92.9284712169076	0.686846666138701	0.191621764812972	0.148414496157388	RPL32P3	132241	ribosomal protein L32 pseudogene 3
ENSG00000232931.6	31.7112487805189	0.686809156590154	0.310143342347069	0.157821479647791	NA	NA	NA
ENSG00000134243.12	1287.3992876427	0.685956462350382	0.0749897193678106	0.122440454950583	SORT1	6272	sortilin 1
ENSG00000135926.15	626.087430976213	0.685387258662963	0.132424426354692	0.142560555889229	TMBIM1	64114	transmembrane BAX inhibitor motif containing 1
ENSG00000143801.17	133.695753195877	0.685299611175064	0.212745373143734	0.152444628645311	PSEN2	5664	presenilin 2
ENSG00000116717.13	193.117044813743	0.685018565788699	0.177395631813551	0.148760089635393	GADD45A	1647	growth arrest and DNA damage inducible alpha
ENSG00000129219.14	23.1980730139485	0.685011328019604	0.694141087126565	0.166011416491187	PLD2	5338	phospholipase D2
ENSG00000075275.16	15.3326492931941	0.684723028736136	0.462559270767136	0.16316897472969	CELSR1	9620	cadherin EGF LAG seven-pass G-type receptor 1
ENSG00000266173.7	71.1534619535342	0.684336164550814	0.278394765275188	0.158504977927428	STRADA	92335	STE20 related adaptor alpha
ENSG00000166923.12	44418.5161101299	0.684298324377234	0.0890350001370623	0.133368994691188	GREM1	26585	gremlin 1, DAN family BMP antagonist
ENSG00000162836.12	61.4362523651652	0.684169353221067	0.282133727204267	0.158846338916612	ACP6	51205	acid phosphatase 6, lysophosphatidic
ENSG00000285813.1	16.1961225355554	0.683705127205273	0.450873202964126	0.163396861520913	NA	NA	NA
ENSG00000168994.13	121.682429808054	0.683460051863516	0.183458674864621	0.151410801475535	PXDC1	221749	PX domain containing 1
ENSG00000106608.16	86.4602528050382	0.682588446458394	0.322924829873382	0.161461999697263	URGCP	55665	upregulator of cell proliferation
ENSG00000108387.15	11.15983285697	0.682393751735632	0.485916611898118	0.1648759773254	SEPTIN4	5414	septin 4
ENSG00000117298.16	283.592577331828	0.682163547197468	0.124844775715424	0.145536857358579	ECE1	1889	endothelin converting enzyme 1
ENSG00000100422.14	357.516863875382	0.681874678426652	0.119745755735568	0.144963618209774	CERK	64781	ceramide kinase
ENSG00000188933.16	107.702794697994	0.681824267068193	0.19581572503216	0.155309234068441	USP32P1	162632	ubiquitin specific peptidase 32 pseudogene 1
ENSG00000189423.13	25.4472334811322	0.681782972330763	0.374963853982144	0.163055071353724	NA	NA	NA
ENSG00000197885.10	533.407136311703	0.681376078460645	0.177645008994018	0.153592061471765	NKIRAS1	28512	NFKB inhibitor interacting Ras like 1
ENSG00000235859.5	27.6667693657231	0.681240350249269	0.321885879311929	0.162030659712565	NA	NA	NA
ENSG00000100106.22	108.265275308032	0.67978544122346	0.181840067721176	0.156337290475626	TRIOBP	11078	TRIO and F-actin binding protein
ENSG00000228495.2	10.3449109417442	0.679566673247725	0.602893760091473	0.167486290101833	LINC01013	100507254	long intergenic non-protein coding RNA 1013
ENSG00000179388.9	11.7070982462507	0.679478841094513	0.532173390613149	0.166806045010569	EGR3	1960	early growth response 3
ENSG00000185085.2	18.6424605296814	0.679137220107879	0.393383698761438	0.165216599621607	INTS5	80789	integrator complex subunit 5
ENSG00000227533.6	192.896840602888	0.679129648488129	0.142643302418486	0.152674128466592	SLC2A1-AS1	440584	SLC2A1 antisense RNA 1
ENSG00000183354.12	291.155380407102	0.679114025558184	0.179743405181888	0.157022525199081	KIAA2026	158358	KIAA2026
ENSG00000104904.12	1023.99390233212	0.678453035694601	0.443853537362376	0.166238479530642	OAZ1	4946	ornithine decarboxylase antizyme 1
ENSG00000144681.10	17.2894804326427	0.67815506961251	0.491827905672088	0.167032815475653	STAC	6769	SH3 and cysteine rich domain
ENSG00000135205.15	22.5797708940466	0.677525564457325	0.498839242554768	0.167372973503297	CCDC146	57639	coiled-coil domain containing 146
ENSG00000250802.7	25.8554898587872	0.67696142236171	0.384760949392104	0.166124981811063	ZBED3-AS1	728723	ZBED3 antisense RNA 1
ENSG00000196466.10	33.9273731365965	0.676490392871632	0.32321892526557	0.165670364089883	ZNF799	90576	zinc finger protein 799
ENSG00000107518.18	22.5313575568169	0.675856050050594	0.711820778278172	0.168959730177957	ATRNL1	26033	attractin like 1
ENSG00000205269.6	81.1513120809542	0.675465417977451	0.243697976458826	0.164079799890387	TMEM170B	100113407	transmembrane protein 170B
ENSG00000254665.1	135.800344168688	0.675426464196872	0.252331932435985	0.164307284578979	NA	NA	NA
ENSG00000106688.12	149.779194915413	0.674668422824262	0.150903975043863	0.161007311906674	SLC1A1	6505	solute carrier family 1 member 1
ENSG00000130304.17	16.5946033272797	0.674162699157655	0.437858256939154	0.168392635819598	SLC27A1	376497	solute carrier family 27 member 1
ENSG00000087274.17	428.65504012093	0.673987964562311	0.266260894416703	0.165897779506831	ADD1	118	adducin 1
ENSG00000137496.18	43.3508231217338	0.673763411343846	0.312365311994219	0.167259613390074	IL18BP	10068	interleukin 18 binding protein
ENSG00000142082.15	58.489526152333	0.673091655827641	0.251776416839528	0.166579133256189	SIRT3	23410	sirtuin 3
ENSG00000288541.1	7.80909079187738	0.672538462870981	0.693457148625253	0.169528330264235	NA	NA	NA
ENSG00000116209.12	5928.04716385999	0.672508721703489	0.0685245882302139	0.153706753665897	TMEM59	9528	transmembrane protein 59
ENSG00000132334.16	119.144420519378	0.672420690470147	0.169429742215303	0.164648673698001	PTPRE	5791	protein tyrosine phosphatase receptor type E
ENSG00000189195.13	24.272339269748	0.671478242055329	0.511562476413547	0.169300923745943	BTBD8	284697	BTB domain containing 8
ENSG00000064692.19	143.359396867233	0.6713138670295	0.229585344614178	0.168052552768777	SNCAIP	9627	synuclein alpha interacting protein
ENSG00000198939.8	23.7790086294876	0.671105536929436	0.552516553585711	0.169642008608957	ZFP2	80108	ZFP2 zinc finger protein
ENSG00000286153.1	8.26849134687263	0.671104053795712	0.589700386202818	0.169869200145685	NA	NA	NA
ENSG00000166912.17	159.346185245944	0.671030716259593	0.246353470026375	0.168279327502198	MTMR10	54893	myotubularin related protein 10
ENSG00000107679.14	350.642776838053	0.671015811104594	0.152398462069029	0.165784104318561	PLEKHA1	59338	pleckstrin homology domain containing A1
ENSG00000277501.1	23.4009546622098	0.670663004306567	0.352133548667969	0.169073391659583	NA	NA	NA
ENSG00000257207.5	13.4456096021658	0.670488535483216	0.47235221185385	0.169755614316229	NA	NA	NA
ENSG00000204852.16	228.106336472412	0.669988201943092	0.157419734642522	0.167939345568802	TCTN1	79600	tectonic family member 1
ENSG00000136478.7	551.001252389562	0.668919034654792	0.120935392316771	0.168505933314782	TEX2	55852	testis expressed 2
ENSG00000087299.12	20.9488785919465	0.668717680409284	0.441714501563331	0.17043729799197	L2HGDH	79944	L-2-hydroxyglutarate dehydrogenase
ENSG00000124151.19	237.936801443964	0.668642593357558	0.34587792064083	0.17020998849352	NCOA3	8202	nuclear receptor coactivator 3
ENSG00000105677.12	311.798867259853	0.668631555409127	0.116660952708394	0.168732806513921	TMEM147	10430	transmembrane protein 147
ENSG00000224616.3	22.5294528613423	0.668333595894454	0.636779069439188	0.170664751134434	NA	NA	NA
ENSG00000186501.14	65.7633306198626	0.6681670775443	0.621234701421298	0.170891980428881	TMEM222	84065	transmembrane protein 222
ENSG00000284606.1	12.6449047826721	0.667918442527607	0.593832434698547	0.171232349421463	NA	NA	NA
ENSG00000262902.1	78.4082373691044	0.667840954218044	0.215218323539712	0.170323681312921	MTCO1P40	107075172	MT-CO1 pseudogene 40
ENSG00000173064.13	85.9549632265295	0.66741696576227	0.261436477455826	0.171118959431002	HECTD4	283450	HECT domain E3 ubiquitin protein ligase 4
ENSG00000167554.15	60.0652871729505	0.667416624283908	0.27200784744381	0.17145889792375	ZNF610	162963	zinc finger protein 610
ENSG00000135636.14	23.3725644413027	0.666373766670263	0.480500395075155	0.172251038071622	DYSF	8291	dysferlin
ENSG00000236682.2	25.3960011347984	0.665600233280337	0.363612698782937	0.172703275538609	MAP3K2-DT	100506922	MAP3K2 divergent transcript
ENSG00000189221.9	244.969236107797	0.665531531803984	0.176184861157105	0.173382703325298	MAOA	4128	monoamine oxidase A
ENSG00000244921.2	721.849073863749	0.665321448315665	0.117668455977765	0.174966446055062	MTCYBP18	107075130	MT-CYB pseudogene 18
ENSG00000089041.17	103.622728991704	0.665121978274071	0.242551912421133	0.173269437836724	P2RX7	5027	purinergic receptor P2X 7
ENSG00000143578.16	54.9801263738154	0.66448249859647	0.264044948511677	0.173722352025887	CREB3L4	148327	cAMP responsive element binding protein 3 like 4
ENSG00000235531.11	82.2085737789236	0.664281916323369	0.40959915481388	0.173042864239973	MSC-AS1	100132891	MSC antisense RNA 1
ENSG00000159842.15	64.4660220266896	0.664106403435699	0.275673873371868	0.173835602556426	ABR	29	ABR activator of RhoGEF and GTPase
ENSG00000152582.14	84.5593179395227	0.663677812792655	0.277926683051889	0.174401483203583	SPEF2	79925	sperm flagellar 2
ENSG00000033627.16	75.2879185269246	0.66345118808656	0.259293763593821	0.174853455173475	ATP6V0A1	535	ATPase H+ transporting V0 subunit a1
ENSG00000204054.14	319.526242715462	0.66319893419617	0.189224019766029	0.17587060421277	NA	NA	NA
ENSG00000260280.5	24.0633584107941	0.662760904981219	0.34154758777516	0.174514530342803	SLX1B-SULT1A4	100526831	SLX1B-SULT1A4 readthrough (NMD candidate)
ENSG00000124766.7	1380.26841301328	0.66230086936626	0.103991014265013	0.180638417861891	SOX4	6659	SRY-box transcription factor 4
ENSG00000130775.16	33.1679115534747	0.661421470913317	0.379019520356112	0.175079421507612	THEMIS2	9473	thymocyte selection associated family member 2
ENSG00000163512.14	1473.8631366761	0.66063169339789	0.230918007729616	0.176664255384636	AZI2	64343	5-azacytidine induced 2
ENSG00000147535.17	827.102789087273	0.660518480570742	0.134719314290433	0.181657245741976	PLPP5	84513	phospholipid phosphatase 5
ENSG00000269145.2	19.0641639345599	0.660481428294612	0.389599922831891	0.175531049434271	NA	NA	NA
ENSG00000115738.10	1081.16698218869	0.660469769885195	0.13570620497518	0.18177020845628	ID2	3398	inhibitor of DNA binding 2
ENSG00000152223.15	711.611313951647	0.65975810743341	0.104784054746229	0.18606076234329	EPG5	57724	ectopic P-granules autophagy protein 5 homolog
ENSG00000083799.17	869.894943681892	0.659057115935531	0.143822184555549	0.183463411413606	CYLD	1540	CYLD lysine 63 deubiquitinase
ENSG00000139631.18	99.9582314935768	0.659007822767933	0.264327613903915	0.177232400892356	CSAD	51380	cysteine sulfinic acid decarboxylase
ENSG00000115183.15	314.530013012991	0.658840083887335	0.123343907340195	0.185043673946859	TANC1	85461	tetratricopeptide repeat, ankyrin repeat and coiled-coil containing 1
ENSG00000168958.19	402.259902172505	0.658469421594336	0.116290974890025	0.186964358559867	MFF	56947	mitochondrial fission factor
ENSG00000113328.19	4299.73565232747	0.658435481266668	0.10251928505982	0.18888355264785	CCNG1	900	cyclin G1
ENSG00000072401.15	171.834819542303	0.657826973643936	0.171017330669794	0.183125057132673	UBE2D1	7321	ubiquitin conjugating enzyme E2 D1
ENSG00000105732.13	7.04654402150634	0.657694735190894	0.629790087707458	0.175192327586067	ZNF574	64763	zinc finger protein 574
ENSG00000269713.7	907.116155075358	0.657665679983175	0.272146991172886	0.178027500072054	NBPF9	400818	NBPF member 9
ENSG00000169057.23	175.149559054356	0.657655612911993	0.992765318853994	0.173609155437273	MECP2	4204	methyl-CpG binding protein 2
ENSG00000111725.11	109.607016891655	0.65626834272268	0.181347105272927	0.184140053831421	PRKAB1	5564	protein kinase AMP-activated non-catalytic subunit beta 1
ENSG00000166313.19	32.3403730467661	0.656201081871759	0.483940903906806	0.176097273278782	APBB1	322	amyloid beta precursor protein binding family B member 1
ENSG00000155903.13	189.890293960506	0.655255280776824	0.16543457415443	0.186399515439789	RASA2	5922	RAS p21 protein activator 2
ENSG00000169925.17	29.4697298045362	0.655026800712038	0.392389840995467	0.177345977985505	BRD3	8019	bromodomain containing 3
ENSG00000159884.12	38.7931372490641	0.654714927877651	0.288037955541325	0.179844068827838	CCDC107	203260	coiled-coil domain containing 107
ENSG00000253392.3	15.0258676465702	0.65452926435889	0.542808418569366	0.176323832396759	NA	NA	NA
ENSG00000117385.16	86.7592143894238	0.654528821935689	0.36884610135396	0.177913873441698	P3H1	64175	prolyl 3-hydroxylase 1
ENSG00000185624.15	355.727073084589	0.65451378630324	0.162836823809942	0.187641495948277	P4HB	5034	prolyl 4-hydroxylase subunit beta
ENSG00000260578.1	122.818206843277	0.65398117951009	0.167840678619497	0.187754377261608	NA	NA	NA
ENSG00000223768.2	111.903365817877	0.653702627267368	0.210881054038153	0.184591571403318	LINC00205	642852	long intergenic non-protein coding RNA 205
ENSG00000223773.7	20.4697847407376	0.653613306974625	0.446273643773909	0.177118784288631	CD99P1	401577	CD99 molecule pseudogene 1
ENSG00000006282.21	36.0227209400108	0.653433046304135	0.373308577825274	0.178595078128576	SPATA20	64847	spermatogenesis associated 20
ENSG00000117461.15	169.055661452718	0.653239375747889	0.13614443249769	0.191714462328311	PIK3R3	8503	phosphoinositide-3-kinase regulatory subunit 3
ENSG00000163864.17	15.5078725072649	0.652997298471435	0.506471370522463	0.176777830154788	NMNAT3	349565	nicotinamide nucleotide adenylyltransferase 3
ENSG00000165185.14	51.8654202010237	0.65265695786899	0.270351296846418	0.18289945917832	KIAA1958	158405	KIAA1958
ENSG00000077616.11	6.69335240181717	0.652622154305924	0.629321686433821	0.176210582703408	NAALAD2	10003	N-acetylated alpha-linked acidic dipeptidase 2
ENSG00000243749.1	2190.7694824429	0.652561401826591	0.135174327899992	0.192281816416163	TMEM35B	100506144	transmembrane protein 35B
ENSG00000141441.16	14.3328001521936	0.652067848875633	0.605679453858952	0.176437232776369	GAREM1	64762	GRB2 associated regulator of MAPK1 subtype 1
ENSG00000237441.10	30.1355874661476	0.651407027850324	0.328233475115377	0.181318033055187	RGL2	5863	ral guanine nucleotide dissociation stimulator like 2
ENSG00000235823.3	62.189718612779	0.651184745457297	0.237638649751229	0.185156824054305	OLMALINC	90271	oligodendrocyte maturation-associated long intergenic non-coding RNA
ENSG00000050426.16	657.639517602831	0.65118109327797	0.12391120649738	0.196597422995239	LETMD1	25875	LETM1 domain containing 1
ENSG00000197217.13	391.127040336148	0.650697622188585	0.143237022106595	0.193759166034412	ENTPD4	9583	ectonucleoside triphosphate diphosphohydrolase 4
ENSG00000170390.16	41.1842168527047	0.650384586170643	0.314334118539652	0.182786594366554	DCLK2	166614	doublecortin like kinase 2
ENSG00000239305.7	294.370044681152	0.650359719800536	0.15232783550932	0.193077297808715	RNF103	7844	ring finger protein 103
ENSG00000140398.14	6.14779187618132	0.649766875898655	0.687342186085717	0.176550612805992	NEIL1	79661	nei like DNA glycosylase 1
ENSG00000185561.10	67.9991043048961	0.649671169310014	0.254402257507677	0.185609076384706	TLCD2	727910	TLC domain containing 2
ENSG00000259431.6	69.6547899168873	0.649199916931427	0.486990848265582	0.178821936883005	THTPA	79178	thiamine triphosphatase
ENSG00000135763.10	31.6658584775911	0.649091481708601	0.316340038295302	0.183801761797147	URB2	9816	URB2 ribosome biogenesis homolog
ENSG00000054392.13	88.0414427061329	0.648955642795333	0.230420411202719	0.187980027231729	HHAT	55733	hedgehog acyltransferase
ENSG00000226742.4	30.4753823749651	0.648354427770672	0.340777041064687	0.183350633990476	HSBP1L1	440498	heat shock factor binding protein 1 like 1
ENSG00000116785.13	8.07934645271591	0.647829854172913	0.554324100146209	0.178367976080872	CFHR3	10878	complement factor H related 3
ENSG00000224596.8	78.1927362668033	0.647534919277474	0.230030781092616	0.189222185787002	ZMIZ1-AS1	283050	ZMIZ1 antisense RNA 1
ENSG00000134294.14	11038.7949841198	0.647268364518556	0.104127127780999	0.21106246187758	SLC38A2	54407	solute carrier family 38 member 2
ENSG00000001630.17	1056.75084181927	0.646554821700591	0.0816535679373202	0.225971330313288	CYP51A1	1595	cytochrome P450 family 51 subfamily A member 1
ENSG00000234771.3	18.9460889552119	0.646391062722615	0.419378365079421	0.181996066926176	NA	NA	NA
ENSG00000204371.11	37.3164158547471	0.646082221415469	0.667148327450969	0.177459591685525	EHMT2	10919	euchromatic histone lysine methyltransferase 2
ENSG00000169727.12	16.5455265170628	0.646030886466323	0.497991398974461	0.179730544917749	GPS1	2873	G protein pathway suppressor 1
ENSG00000118271.10	14.7537417475737	0.645768284461992	0.475754871240485	0.180184742241356	TTR	7276	transthyretin
ENSG00000182108.11	60.3800480202792	0.645342047378594	0.234430069351165	0.190126581662333	DEXI	28955	Dexi homolog
ENSG00000142279.13	21.61997319987	0.645020208779077	0.522188332304895	0.179503414443228	WTIP	126374	WT1 interacting protein
ENSG00000132670.20	139.752733368462	0.644797465970165	0.243943706112392	0.190013325353484	PTPRA	5786	protein tyrosine phosphatase receptor type A
ENSG00000253669.4	121.831276648893	0.644570346954418	0.20947885182823	0.192395493536486	NA	NA	NA
ENSG00000167232.14	140.621339525471	0.644133618253669	0.226287580807516	0.191601116127374	ZNF91	7644	zinc finger protein 91
ENSG00000139636.15	36.9158143405804	0.643935863111839	0.460597082788637	0.182221921017158	LMBR1L	55716	limb development membrane protein 1 like
ENSG00000178385.15	78.3981329510033	0.643770445764847	0.190948104263462	0.195576269105967	PLEKHM3	389072	pleckstrin homology domain containing M3
ENSG00000285608.1	149.194351741396	0.643763555885725	0.237832422880423	0.190920549844215	NA	NA	NA
ENSG00000075407.18	141.035644600128	0.643698044491438	0.23782449251238	0.19103393916522	ZNF37A	7587	zinc finger protein 37A
ENSG00000020577.14	563.054184358674	0.643690428493293	0.137996995339784	0.205545390265256	SAMD4A	23034	sterile alpha motif domain containing 4A
ENSG00000167565.13	84.9618109524367	0.643044364281416	0.337489381448699	0.186286602997461	SERTAD3	29946	SERTA domain containing 3
ENSG00000121297.8	163.349409665615	0.642721866429946	0.161190748969204	0.201354459481068	TSHZ3	57616	teashirt zinc finger homeobox 3
ENSG00000113231.13	1449.43593541772	0.642616004419168	0.0915480235062195	0.230479442971152	PDE8B	8622	phosphodiesterase 8B
ENSG00000106299.8	376.810503362963	0.642188751216384	0.134990060247952	0.20994124666456	WASL	8976	WASP like actin nucleation promoting factor
ENSG00000224712.12	23.5610530723341	0.642065284919385	0.478414567330198	0.182673680042976	NPIPA3	642778	nuclear pore complex interacting protein family member A3
ENSG00000136048.14	4192.09266749971	0.641628769505141	0.0772172597271537	0.247324843859187	DRAM1	55332	DNA damage regulated autophagy modulator 1
ENSG00000116117.18	351.635963170149	0.641628410610203	0.14151955440456	0.208705787173339	PARD3B	117583	par-3 family cell polarity regulator beta
ENSG00000269242.1	10.9639318629416	0.641352885013491	0.501780312613566	0.182334904658003	NA	NA	NA
ENSG00000213096.10	93.420965117086	0.640626017775122	0.256248111479281	0.19194117865109	ZNF254	9534	zinc finger protein 254
ENSG00000158467.16	21.617773068962	0.640028244078096	0.520162105054346	0.182560788700238	AHCYL2	23382	adenosylhomocysteinase like 2
ENSG00000168569.8	45.3120177447985	0.639920248372513	0.277638178834004	0.190807122675494	TMEM223	79064	transmembrane protein 223
ENSG00000173193.15	733.665024000833	0.639663685301232	0.129733349464433	0.215652079361852	PARP14	54625	poly(ADP-ribose) polymerase family member 14
ENSG00000232044.7	6.1073954384641	0.639597856408971	0.798859741878343	0.178141050195051	NA	NA	NA
ENSG00000136147.18	158.792952346309	0.639480649532142	0.155138590274349	0.207692453286664	PHF11	51131	PHD finger protein 11
ENSG00000100319.13	16.5999566950933	0.63861985002645	0.503295097962842	0.183689026041906	ZMAT5	55954	zinc finger matrin-type 5
ENSG00000116285.13	323.644479971191	0.638125094612731	0.133902514885923	0.216881473601425	ERRFI1	54206	ERBB receptor feedback inhibitor 1
ENSG00000119844.15	267.32537684513	0.638018214438125	0.11374011861177	0.227074317324296	AFTPH	54812	aftiphilin
ENSG00000182504.11	334.876011082899	0.637975254463588	0.912581409912722	0.177686663807563	CEP97	79598	centrosomal protein 97
ENSG00000149485.19	2127.62746209707	0.63796635515211	0.084712432979671	0.25094624239199	FADS1	3992	fatty acid desaturase 1
ENSG00000104805.16	69.8571621597596	0.637544282245632	0.387843014938768	0.187415827524771	NUCB1	4924	nucleobindin 1
ENSG00000139329.5	30218.2021990884	0.637484089799349	0.0914728658162039	0.244647554268619	LUM	4060	lumican
ENSG00000109472.14	573.244069732032	0.637313061691566	0.0985886619838944	0.237599589491825	CPE	1363	carboxypeptidase E
ENSG00000133398.4	255.260109674084	0.63730820840596	0.273940974734891	0.192622954972785	MED10	84246	mediator complex subunit 10
ENSG00000105656.13	8.41355455538772	0.637143830027977	0.618171251049562	0.181883119211188	ELL	8178	elongation factor for RNA polymerase II
ENSG00000100664.11	1375.08665161286	0.636455743851058	0.141087765201642	0.216993236048373	EIF5	1983	eukaryotic translation initiation factor 5
ENSG00000272070.1	26.2542573329704	0.636021683387142	0.330335616366563	0.190239944636001	NA	NA	NA
ENSG00000139116.18	87.8596131578093	0.635810406537502	0.210324879004586	0.201014150856396	KIF21A	55605	kinesin family member 21A
ENSG00000155287.11	97.4611274836505	0.63578992273096	0.20154746176069	0.202374818498763	SLC25A28	81894	solute carrier family 25 member 28
ENSG00000115468.12	104.771140433382	0.635690773400283	0.19681795862474	0.203054855277926	EFHD1	80303	EF-hand domain family member D1
ENSG00000149084.13	1059.87939622161	0.635386004526322	0.0883836685585885	0.255907459951722	HSD17B12	51144	hydroxysteroid 17-beta dehydrogenase 12
ENSG00000154305.18	497.983434071204	0.635376972401887	0.247399058554872	0.196710967108551	MIA3	375056	MIA SH3 domain ER export factor 3
ENSG00000128917.8	7.09687077365938	0.635228866855717	0.711831688297952	0.180298226379203	DLL4	54567	delta like canonical Notch ligand 4
ENSG00000225655.5	19.7828438043774	0.634776863981238	0.47753872990141	0.185496019706672	NA	NA	NA
ENSG00000205903.7	14.0657382044616	0.633751963431746	0.428104081101453	0.187867197029912	ZNF316	100131017	zinc finger protein 316
ENSG00000164038.16	427.243001720887	0.633685069922735	0.175625639887448	0.211174580914037	SLC9B2	133308	solute carrier family 9 member B2
ENSG00000162641.20	34.9690683783324	0.632964954148706	0.298398364280033	0.193986297132584	AKNAD1	254268	AKNA domain containing 1
ENSG00000257337.7	29.5071279651139	0.63270399138338	0.356714066848449	0.190580195092358	LOC283335	283335	uncharacterized LOC283335
ENSG00000170370.12	663.875434953159	0.632646897070338	0.227134803693495	0.201581242462663	EMX2	2018	empty spiracles homeobox 2
ENSG00000240184.7	42.6691873675908	0.632626771162831	0.390094366690467	0.189673815865474	PCDHGC3	5098	protocadherin gamma subfamily C, 3
ENSG00000272333.6	10.786894890495	0.632579587418356	0.781177678038846	0.180071182497956	KMT2B	9757	lysine methyltransferase 2B
ENSG00000172345.14	235.150733380814	0.632398384043354	0.143380512234064	0.22376188407738	STARD5	80765	StAR related lipid transfer domain containing 5
ENSG00000111911.7	101.237929586577	0.632022030933568	0.186853217027688	0.210613758848868	HINT3	135114	histidine triad nucleotide binding protein 3
ENSG00000153214.11	894.148747215674	0.631650753259003	0.101742349162341	0.252640818533148	TMEM87B	84910	transmembrane protein 87B
ENSG00000104324.16	2530.02041858687	0.630488735130162	0.0833450596522288	0.277765370369517	CPQ	10404	carboxypeptidase Q
ENSG00000111674.9	531.585762297557	0.630436702092169	0.128205988541721	0.233767528005333	ENO2	2026	enolase 2
ENSG00000137563.12	837.537299111529	0.630424552847807	0.0874689549695287	0.272784158206423	GGH	8836	gamma-glutamyl hydrolase
ENSG00000163703.18	141.242571947215	0.630350886478347	0.877278780654526	0.179389736052738	CRELD1	78987	cysteine rich with EGF like domains 1
ENSG00000127481.15	1080.4022732723	0.630241250681129	0.120852854769542	0.238798635974712	UBR4	23352	ubiquitin protein ligase E3 component n-recognin 4
ENSG00000158669.11	65.8335233303864	0.629914130498529	0.288090477388459	0.197164714028235	GPAT4	137964	glycerol-3-phosphate acyltransferase 4
ENSG00000103066.13	121.475980851617	0.629639210862506	1.02065703335241	0.178935260522389	PLA2G15	23659	phospholipase A2 group XV
ENSG00000131389.17	358.71888535014	0.629538553138778	0.168036090763665	0.219663039335379	SLC6A6	6533	solute carrier family 6 member 6
ENSG00000116984.13	458.969879492005	0.629204159013162	0.143146372991313	0.229712658050145	MTR	4548	5-methyltetrahydrofolate-homocysteine methyltransferase
ENSG00000165782.10	129.360977217067	0.629170560449673	0.166360227692295	0.220770807890079	PIP4P1	90809	phosphatidylinositol-4,5-bisphosphate 4-phosphatase 1
ENSG00000167981.7	59.0557216583488	0.628859277123146	0.218695281599043	0.206675918854213	ZNF597	146434	zinc finger protein 597
ENSG00000160223.17	6.76959062682283	0.628527091866846	0.636797954355404	0.184478507797585	ICOSLG	23308	inducible T cell costimulator ligand
ENSG00000112419.14	3982.30262878083	0.628385008718675	0.0704545632839236	0.30951567257372	PHACTR2	9749	phosphatase and actin regulator 2
ENSG00000168591.16	108.84732192843	0.628322321653028	0.460293887295152	0.188996462035779	TMUB2	79089	transmembrane and ubiquitin like domain containing 2
ENSG00000176928.7	333.984623536504	0.628219859035067	0.123670330661301	0.241407284819025	GCNT4	51301	glucosaminyl (N-acetyl) transferase 4
ENSG00000181722.16	1794.87374865497	0.627983261856166	0.150847087708055	0.228065507636759	ZBTB20	26137	zinc finger and BTB domain containing 20
ENSG00000132837.15	26.1379712438005	0.627433745871107	0.468732626288796	0.189109347316391	DMGDH	29958	dimethylglycine dehydrogenase
ENSG00000122707.12	1187.48898195972	0.627348167284722	0.0984998132838939	0.267974023539282	RECK	8434	reversion inducing cysteine rich protein with kazal motifs
ENSG00000096696.14	442.327480699217	0.626941953056086	0.135408885041114	0.23639811373022	DSP	1832	desmoplakin
ENSG00000124201.15	1554.32387274831	0.626721238143617	0.197691593278771	0.21453511081085	ZNFX1	57169	zinc finger NFX1-type containing 1
ENSG00000101493.11	270.958208968087	0.626600151938724	0.124275007915556	0.245935054939727	ZNF516	9658	zinc finger protein 516
ENSG00000270672.1	33.4717805710983	0.626548677585383	0.299695043878506	0.198864236751204	MTRNR2L6	100463482	MT-RNR2 like 6
ENSG00000139112.11	925.014014521346	0.626186279973688	0.110558061950461	0.258631529985041	GABARAPL1	23710	GABA type A receptor associated protein like 1
ENSG00000153233.13	60.1677353838973	0.625506624687902	0.234339382885169	0.207353943066407	PTPRR	5801	protein tyrosine phosphatase receptor type R
ENSG00000119227.8	31.2627750482938	0.624865273207791	0.350403452232475	0.194894479567494	PIGZ	80235	phosphatidylinositol glycan anchor biosynthesis class Z
ENSG00000165028.12	100.764482503494	0.624807272761309	0.23212782968616	0.209267579827079	NIPSNAP3B	55335	nipsnap homolog 3B
ENSG00000129250.12	323.300576371181	0.624222287262749	0.136035185061084	0.241624018538575	KIF1C	10749	kinesin family member 1C
ENSG00000189410.12	14.9517785738606	0.623543774262924	0.429736602274118	0.191827741204175	SH2D5	400745	SH2 domain containing 5
ENSG00000160917.15	53.3658341213171	0.623308545883322	0.327890344448252	0.198071968743699	CPSF4	10898	cleavage and polyadenylation specific factor 4
ENSG00000132639.12	204.786888700053	0.623272786975265	0.157214549583973	0.232671291668308	SNAP25	6616	synaptosome associated protein 25
ENSG00000203722.8	82.5007536665238	0.622959384479891	0.284648990166478	0.202261484235278	RAET1G	353091	retinoic acid early transcript 1G
ENSG00000204186.10	74.8349786531471	0.62285673846043	0.206391198088754	0.216658088846163	ZDBF2	57683	zinc finger DBF-type containing 2
ENSG00000286523.1	5.71451048762929	0.622563356014948	0.648132612138344	0.18594787334513	NA	NA	NA
ENSG00000151320.11	725.363113278978	0.622319501392183	0.151979415021273	0.235522284292736	AKAP6	9472	A-kinase anchoring protein 6
ENSG00000188613.7	40.426482948586	0.621695991856867	0.398804320053134	0.193531778534976	NANOS1	340719	nanos C2HC-type zinc finger 1
ENSG00000151012.13	1493.50627832425	0.621648700780703	0.111647308053858	0.269207717575059	SLC7A11	23657	solute carrier family 7 member 11
ENSG00000273437.1	11.659162810963	0.62118772479205	0.465445581130146	0.191147312439735	NA	NA	NA
ENSG00000169359.16	328.164062462385	0.621114146771013	0.135876477689414	0.249350959283442	SLC33A1	9197	solute carrier family 33 member 1
ENSG00000166484.20	51.6601617177972	0.62108698109848	0.305407196867546	0.201241007968989	MAPK7	5598	mitogen-activated protein kinase 7
ENSG00000143178.13	12.7899862187049	0.621020333931227	0.508609454505765	0.189900172956542	TBX19	9095	T-box transcription factor 19
ENSG00000198162.12	1024.58564391763	0.62100163468607	0.23452395295844	0.212184324701508	MAN1A2	10905	mannosidase alpha class 1A member 2
ENSG00000135956.8	713.193405207091	0.620333684786361	0.0879464071489421	0.304645321278784	TMEM127	55654	transmembrane protein 127
ENSG00000064225.12	129.103624902646	0.620238467631369	0.163126071819883	0.233986934888274	ST3GAL6	10402	ST3 beta-galactoside alpha-2,3-sialyltransferase 6
ENSG00000266094.8	27.6102325794587	0.618558592519004	0.325529661959697	0.201127520045237	RASSF5	83593	Ras association domain family member 5
ENSG00000106799.13	841.364820788939	0.617919520525957	0.100088945888865	0.293791307921719	TGFBR1	7046	transforming growth factor beta receptor 1
ENSG00000151575.14	33.7528301192157	0.617836937261434	0.358373882373213	0.199316596573609	TEX9	374618	testis expressed 9
ENSG00000231501.1	6.56861150764036	0.617763944079779	0.617226238803992	0.188205750089386	MTND4LP1	106478909	MT-ND4L pseudogene 1
ENSG00000135709.12	35.2379054202721	0.617482584191696	0.276555685392729	0.208368446904597	KIAA0513	9764	KIAA0513
ENSG00000241399.7	291.986228600856	0.617377075600048	0.129226347290772	0.26269738112945	CD302	9936	CD302 molecule
ENSG00000046889.19	180.38981833563	0.617231156249019	0.166682510420921	0.237053517634674	PREX2	80243	phosphatidylinositol-3,4,5-trisphosphate dependent Rac exchange factor 2
ENSG00000175155.10	55.6433173369088	0.617213396381933	0.259751897455605	0.211399069454174	YPEL2	388403	yippee like 2
ENSG00000280739.3	25.128037558043	0.616419204199579	0.38270025718552	0.197731776145333	EIF1B-AS1	440952	EIF1B antisense RNA 1
ENSG00000237172.4	55.0927391797912	0.616312995422356	0.243046871513435	0.215428303135121	B3GNT9	84752	UDP-GlcNAc:betaGal beta-1,3-N-acetylglucosaminyltransferase 9
ENSG00000259045.1	58.2901273525916	0.61630272466801	0.282998823654093	0.208480952756733	NA	NA	NA
ENSG00000158552.13	31.9578211673085	0.616289503921327	0.289938000407478	0.206901885721181	ZFAND2B	130617	zinc finger AN1-type containing 2B
ENSG00000117899.11	832.751744724161	0.616229085326619	0.165853465079643	0.239125281976158	MESD	23184	mesoderm development LRP chaperone
ENSG00000198855.7	149.509476389035	0.616226855434171	0.168592143908355	0.237708750620663	FICD	11153	FIC domain protein adenylyltransferase
ENSG00000165949.12	809.406113214137	0.616203933859615	0.125116801288896	0.2688996384329	IFI27	3429	interferon alpha inducible protein 27
ENSG00000107186.16	342.036278687087	0.616199328889624	0.126918873791488	0.267562118391654	MPDZ	8777	multiple PDZ domain crumbs cell polarity complex component
ENSG00000125454.12	60.2609903567032	0.615679766229385	0.396589728062242	0.197391367782995	SLC25A19	60386	solute carrier family 25 member 19
ENSG00000165006.14	58.0337499951174	0.615668911096603	0.235701441311007	0.217885590644007	UBAP1	51271	ubiquitin associated protein 1
ENSG00000164713.10	123.382090428045	0.61453559056118	0.163503223082201	0.24367854465562	BRI3	25798	brain protein I3
ENSG00000162643.13	48.9075461747243	0.614265964512388	0.391235271749657	0.198751164755761	DNAI3	126820	dynein axonemal intermediate chain 3
ENSG00000171853.16	123.336081957275	0.614075027309553	0.201365466042345	0.22927376532597	TRAPPC12	51112	trafficking protein particle complex subunit 12
ENSG00000196110.8	22.7082145171814	0.613717767809031	0.380180987968561	0.199994825208976	ZNF699	374879	zinc finger protein 699
ENSG00000161013.17	16.4287778671027	0.613636216523903	0.430786494870554	0.196256966615038	MGAT4B	11282	alpha-1,3-mannosyl-glycoprotein 4-beta-N-acetylglucosaminyltransferase B
ENSG00000242086.8	51.1776457417299	0.613479906420101	0.252887603384807	0.215764013800239	SDHAP2	727956	succinate dehydrogenase complex flavoprotein subunit A pseudogene 2
ENSG00000234290.2	4.96048709282825	0.613283767887356	0.709014698471386	0.187302935279164	NA	NA	NA
ENSG00000148426.13	48.6077740342041	0.612837174062073	0.24882191529651	0.217774216530554	PROSER2	254427	proline and serine rich 2
ENSG00000164885.13	26.8221170077039	0.612780676904684	0.332649154206013	0.204187801461233	CDK5	1020	cyclin dependent kinase 5
ENSG00000122786.20	52887.287799675	0.612563962738488	0.0907110664214598	0.324372168835285	CALD1	800	caldesmon 1
ENSG00000242808.9	15.6197392700936	0.612512160570919	0.440007416493517	0.196030227609764	SOX2-OT	347689	SOX2 overlapping transcript
ENSG00000180667.10	91.6205209031909	0.612488029931764	0.212708772451815	0.227404870347609	YOD1	55432	YOD1 deubiquitinase
ENSG00000197912.15	208.438759421676	0.612198997531886	0.18522722282003	0.236507383997464	SPG7	6687	SPG7 matrix AAA peptidase subunit, paraplegin
ENSG00000184271.17	51.7478321726107	0.611951866207911	0.259635727609017	0.215987751730881	POU6F1	5463	POU class 6 homeobox 1
ENSG00000279159.1	33.9975858262128	0.611824870415859	0.300959649876233	0.209716867199087	NA	NA	NA
ENSG00000183513.9	146.816327571728	0.611645575236236	0.16245178020348	0.249989676757253	COA5	493753	cytochrome c oxidase assembly factor 5
ENSG00000145246.14	1075.26802380189	0.610864320660837	0.079584815290358	0.35624612531939	ATP10D	57205	ATPase phospholipid transporting 10D (putative)
ENSG00000156973.14	77.7659050394649	0.610676213055307	0.243856777294278	0.221435401832228	PDE6D	5147	phosphodiesterase 6D
ENSG00000142188.17	830.749927647756	0.610571986386545	0.105087129469721	0.306466162857456	TMEM50B	757	transmembrane protein 50B
ENSG00000256045.3	24.5093381896599	0.610218683711375	0.35089724306345	0.203961463715752	MTRNR2L10	100463488	MT-RNR2 like 10
ENSG00000263986.1	53.2042651212414	0.610153650744165	0.247127451516966	0.22121380565041	NA	NA	NA
ENSG00000141576.16	284.728749889158	0.609953745415531	0.329656831928551	0.206336715413159	RNF157	114804	ring finger protein 157
ENSG00000146197.9	33.6768187873454	0.609670476232416	0.325418081344011	0.207014940429611	SCUBE3	222663	signal peptide, CUB domain and EGF like domain containing 3
ENSG00000230084.6	7.29224286048427	0.609322540844067	0.788765377246222	0.186738609385092	NA	NA	NA
ENSG00000125863.20	272.804461058913	0.609144243425081	0.121233984246989	0.290062887982709	MKKS	8195	MKKS centrosomal shuttling protein
ENSG00000052841.15	748.763340332186	0.608855645029184	0.142469478504772	0.27013006334034	TTC17	55761	tetratricopeptide repeat domain 17
ENSG00000101473.17	65.8709856123269	0.608722376907456	0.295588818916233	0.212633067895389	ACOT8	10005	acyl-CoA thioesterase 8
ENSG00000037042.9	96.9589135626669	0.608718889050404	0.356661863434205	0.20441408757857	TUBG2	27175	tubulin gamma 2
ENSG00000141452.10	67.1764511964304	0.607954458836426	0.331392550159815	0.207917983950545	RMC1	29919	regulator of MON1-CCZ1
ENSG00000127920.6	2895.44701037278	0.607869230616333	0.138454850645228	0.274820930568105	GNG11	2791	G protein subunit gamma 11
ENSG00000013016.16	891.075872911649	0.607139386917201	0.123561782837257	0.292616574430068	EHD3	30845	EH domain containing 3
ENSG00000086696.11	2862.8830675622	0.607081036930343	0.0681259683424205	0.406092574555145	HSD17B2	3294	hydroxysteroid 17-beta dehydrogenase 2
ENSG00000114853.14	19.7892201062342	0.607079707997756	0.436911379284654	0.19920353463393	ZBTB47	92999	zinc finger and BTB domain containing 47
ENSG00000197978.9	26.2434234262986	0.60678607900247	0.325726226263454	0.210277589014442	GOLGA6L9	440295	golgin A6 family like 9
ENSG00000263956.6	171.101168726778	0.606511606519906	0.1908317952013	0.242382133491514	NBPF11	200030	NBPF member 11
ENSG00000100307.13	23.3032901142767	0.606288735993436	0.359778091648349	0.205432308527604	CBX7	23492	chromobox 7
ENSG00000158941.16	59.9369197749085	0.605738703993715	0.287496149704591	0.216434718361111	CCAR2	57805	cell cycle and apoptosis regulator 2
ENSG00000169018.6	868.688727370477	0.604693077536229	0.15347153044352	0.268796855492094	FEM1B	10116	fem-1 homolog B
ENSG00000102678.7	290.297845792923	0.604532904512892	0.176370553883361	0.254435793039216	FGF9	2254	fibroblast growth factor 9
ENSG00000230091.6	14.0211341412655	0.604173638314895	0.463526058761616	0.198977307874384	NA	NA	NA
ENSG00000074842.8	201.753115610715	0.603678824581556	0.34255479690043	0.210165500964468	MYDGF	56005	myeloid derived growth factor
ENSG00000168016.14	74.8472981410615	0.603455357077004	0.218302421733633	0.23486409180835	TRANK1	9881	tetratricopeptide repeat and ankyrin repeat containing 1
ENSG00000229124.7	6.48256295995659	0.603351714569964	0.65808600864665	0.190693642873428	VIM-AS1	100507347	VIM antisense RNA 1
ENSG00000143374.17	173.208888199446	0.602788949619754	0.369857947680393	0.206449808772851	TARS2	80222	threonyl-tRNA synthetase 2, mitochondrial
ENSG00000181026.15	171.432386004468	0.602721375689156	0.234972852008826	0.231466100006679	AEN	64782	apoptosis enhancing nuclease
ENSG00000179029.15	263.63956416073	0.602635942970616	0.117146471144459	0.310369843874542	TMEM107	84314	transmembrane protein 107
ENSG00000101546.13	32.3534403129047	0.601973670406855	0.324497429412118	0.213864591019005	RBFA	79863	ribosome binding factor A
ENSG00000261377.5	18.9959255719941	0.601570878113195	0.426083764800654	0.202034656229594	NA	NA	NA
ENSG00000118997.14	5.8854193244238	0.601096327402368	0.833888954843435	0.18809287751868	DNAH7	56171	dynein axonemal heavy chain 7
ENSG00000257093.7	65.0614260701358	0.60100181500692	0.202044146922388	0.246363218120421	DENND11	57189	DENN domain containing 11
ENSG00000103047.8	39.2917271379146	0.600863341242086	0.278076176226832	0.222765384969019	TANGO6	79613	transport and golgi organization 6 homolog
ENSG00000105639.19	43.5341044957037	0.600528871774889	0.2802065730026	0.222654602917963	JAK3	3718	Janus kinase 3
ENSG00000280046.1	9.04017687944699	0.600503861619225	0.536873159958509	0.196143632423255	NA	NA	NA
ENSG00000146278.11	208.918131820331	0.600503475208663	0.161194151111785	0.27145849268912	PNRC1	10957	proline rich nuclear receptor coactivator 1
ENSG00000116685.16	84.9104222888434	0.599970492178706	0.220413193618862	0.238689771570251	KIAA2013	90231	KIAA2013
ENSG00000182544.8	138.860617190882	0.599302694305237	0.16130184361725	0.273089910166587	MFSD5	84975	major facilitator superfamily domain containing 5
ENSG00000107669.17	237.965700700113	0.599185103658052	0.301020193001083	0.220438447741782	ATE1	11101	arginyltransferase 1
ENSG00000177697.19	214.282035410857	0.599163852030713	0.195255877311535	0.252535129519575	CD151	977	CD151 molecule (Raph blood group)
ENSG00000133858.16	350.46613783561	0.598994908373806	0.177059674954224	0.262801259503796	ZFC3H1	196441	zinc finger C3H1-type containing
ENSG00000107104.19	614.173916836323	0.598886196598435	0.118998548761352	0.317597295844177	KANK1	23189	KN motif and ankyrin repeat domains 1
ENSG00000227372.12	111.585523968172	0.598467135145469	0.170509732911716	0.267768091858394	TP73-AS1	57212	TP73 antisense RNA 1
ENSG00000069702.11	96.3502052289468	0.598384326392817	0.217077820658915	0.241949056315009	TGFBR3	7049	transforming growth factor beta receptor 3
ENSG00000174233.11	279.384765433938	0.598170703593351	0.217535815077763	0.242057390546212	ADCY6	112	adenylate cyclase 6
ENSG00000140450.9	209.509612712785	0.598102171899542	0.14279993748561	0.29183281387517	ARRDC4	91947	arrestin domain containing 4
ENSG00000241684.6	20.944879354773	0.598074626179102	0.407080436389708	0.205771414820227	ADAMTS9-AS2	100507098	ADAMTS9 antisense RNA 2
ENSG00000138688.15	703.61796010534	0.598040592187635	0.130809793213866	0.303492220496682	KIAA1109	84162	KIAA1109
ENSG00000164647.9	446.870050545895	0.598026522804851	0.123187627108903	0.314887533312852	STEAP1	26872	STEAP family member 1
ENSG00000273604.2	6.80534144209461	0.597958765624186	0.603792843970357	0.194326563120717	EPOP	100170841	elongin BC and polycomb repressive complex 2 associated protein
ENSG00000079482.13	37.3385715077938	0.597918561307273	0.606909888449981	0.193872753279003	OPHN1	4983	oligophrenin 1
ENSG00000187764.11	18.9442242434898	0.597663936684177	0.378730813265509	0.20949229998218	SEMA4D	10507	semaphorin 4D
ENSG00000284773.1	14.3331643516447	0.597429020122297	0.431710393455105	0.203621776106248	NA	NA	NA
ENSG00000168000.14	606.23293745148	0.597297414656026	0.26214292434523	0.230369961393364	BSCL2	26580	BSCL2 lipid droplet biogenesis associated, seipin
ENSG00000267002.4	51.8354189948385	0.597260812317177	0.312172091621791	0.219995443438237	NA	NA	NA
ENSG00000010818.10	399.376462824928	0.597187878486138	0.127978447460201	0.309040481344791	HIVEP2	3097	HIVEP zinc finger 2
ENSG00000174501.14	209.072603134925	0.597125945665678	0.215163679898479	0.245827980482354	ANKRD36C	400986	ankyrin repeat domain 36C
ENSG00000165821.12	90.8212147959498	0.59704739604584	0.200975542560443	0.252957679825896	SALL2	6297	spalt like transcription factor 2
ENSG00000157625.15	92.3737640910535	0.597026425883937	0.203115888511546	0.251370588411645	TAB3	257397	TGF-beta activated kinase 1 (MAP3K7) binding protein 3
ENSG00000174109.5	8.12019614676227	0.596951843373288	0.590479260793478	0.194667098408183	C16orf91	283951	chromosome 16 open reading frame 91
ENSG00000198270.13	81.8340654953192	0.596939773604558	0.258113834566007	0.231136899134155	TMEM116	89894	transmembrane protein 116
ENSG00000141012.13	23.8007933102412	0.596915861818857	0.459320872536154	0.201921268129107	GALNS	2588	galactosamine (N-acetyl)-6-sulfatase
ENSG00000111269.3	352.386149602356	0.596797721783099	0.123915246159959	0.315916554037899	CREBL2	1389	cAMP responsive element binding protein like 2
ENSG00000203875.13	666.894401786882	0.596672692084973	0.139763929165424	0.297495397714482	SNHG5	387066	small nucleolar RNA host gene 5
ENSG00000042286.15	122.66268317068	0.596602698568209	0.287601190152388	0.224535606445277	AIFM2	84883	apoptosis inducing factor mitochondria associated 2
ENSG00000138439.12	71.2736448601142	0.596234470199885	0.209066844958921	0.249670255857089	FAM117B	150864	family with sequence similarity 117 member B
ENSG00000196696.13	44.9411079552807	0.59612191885605	0.324129139566758	0.218441721317367	PDXDC2P-NPIPB14P	283970	nuclear pore complex-interacting protein
ENSG00000164291.17	213.792900854717	0.596047843744188	0.127707695568913	0.313388631552957	ARSK	153642	arylsulfatase family member K
ENSG00000165516.11	235.210518838389	0.595785727008149	0.161656136996393	0.2785739314672	KLHDC2	23588	kelch domain containing 2
ENSG00000001084.13	282.934284280447	0.595780710087693	0.163327760799332	0.27675147106893	GCLC	2729	glutamate-cysteine ligase catalytic subunit
ENSG00000244754.8	2008.0005702244	0.595147639460491	0.110197663364314	0.340480181756095	N4BP2L2	10443	NEDD4 binding protein 2 like 2
ENSG00000006453.14	160.208808730569	0.595052557126449	0.146979444263871	0.293595653209466	BAIAP2L1	55971	BAR/IMD domain containing adaptor protein 2 like 1
ENSG00000258818.4	359.656682799922	0.595032211355993	0.244630738911901	0.235631875285627	RNASE4	6038	ribonuclease A family member 4
ENSG00000198727.2	79547.1203561764	0.594889566402411	0.101555534835891	0.357613751450003	CYTB	4519	cytochrome b
ENSG00000204271.13	50.3657294324274	0.594668044445761	0.244569851995314	0.236288783648619	SPIN3	169981	spindlin family member 3
ENSG00000119938.9	1032.34687888593	0.594647664186154	0.108221938617409	0.345772072880298	PPP1R3C	5507	protein phosphatase 1 regulatory subunit 3C
ENSG00000125503.13	9.57036862535273	0.594565181037973	0.541623650471059	0.198298551546199	PPP1R12C	54776	protein phosphatase 1 regulatory subunit 12C
ENSG00000233006.8	5.06478801943035	0.594371518160968	0.89188011262683	0.188318765667434	MIR3936HG	553103	MIR3936 host gene
ENSG00000126062.4	104.353749341994	0.594337611002991	0.277180658490576	0.22905419373838	TMEM115	11070	transmembrane protein 115
ENSG00000224389.9	18.939655437167	0.594149488843664	0.378688512008978	0.211735481914318	C4B	721	complement C4B (Chido blood group)
ENSG00000263179.1	14.0137120407755	0.594059868011673	0.510662068213991	0.200221114179591	NA	NA	NA
ENSG00000267779.7	9.40805816376853	0.593943697437169	0.556862577223107	0.197504830269455	LINC01533	100996665	long intergenic non-protein coding RNA 1533
ENSG00000100994.12	77.1714275825055	0.593935658050949	0.222446730423412	0.247004677686305	PYGB	5834	glycogen phosphorylase B
ENSG00000156535.15	586.660120499981	0.592808673874077	0.147888718989935	0.297106796501781	CD109	135228	CD109 molecule
ENSG00000177426.20	817.062827632465	0.592763782270971	0.104786408697217	0.357272271201974	TGIF1	7050	TGFB induced factor homeobox 1
ENSG00000089220.5	3092.9129461983	0.592750242859583	0.130082971069014	0.316944228593726	PEBP1	5037	phosphatidylethanolamine binding protein 1
ENSG00000175352.11	94.0041388735565	0.592215397896879	0.182299175001469	0.270947848179695	NRIP3	56675	nuclear receptor interacting protein 3
ENSG00000236204.6	14.3422476480827	0.591954810259384	0.61141642884962	0.195803304314569	LINC01376	400945	long intergenic non-protein coding RNA 1376
ENSG00000121406.9	47.2133219747663	0.591805999046763	0.233455401208617	0.244432437564319	ZNF549	256051	zinc finger protein 549
ENSG00000007933.13	10.9602724776247	0.59172084903255	0.594480416369704	0.196483826190268	FMO3	2328	flavin containing dimethylaniline monoxygenase 3
ENSG00000178935.5	75.1570626677643	0.591113644683676	0.231001899305555	0.247111455910469	ZNF552	79818	zinc finger protein 552
ENSG00000009830.11	47.1008612441088	0.590307550305492	0.240363530306874	0.243246869529419	POMT2	29954	protein O-mannosyltransferase 2
ENSG00000131370.16	104.074352127914	0.590304411038768	0.209912949828253	0.257794230885321	SH3BP5	9467	SH3 domain binding protein 5
ENSG00000122257.20	392.605879907411	0.590070246920221	0.111246300019926	0.352810103798628	RBBP6	5930	RB binding protein 6, ubiquitin ligase
ENSG00000127946.17	793.57335507986	0.589568387627591	0.086103160667252	0.412559327795805	HIP1	3092	huntingtin interacting protein 1
ENSG00000163618.18	10.2545561539749	0.589538642690141	0.709485000423166	0.192963784170181	CADPS	8618	calcium dependent secretion activator
ENSG00000196935.9	419.500348117966	0.589400629261771	0.248224307234737	0.241298886222918	SRGAP1	57522	SLIT-ROBO Rho GTPase activating protein 1
ENSG00000184497.13	19.1999857469808	0.588964884824345	0.513864441796656	0.201807930117556	TMEM255B	348013	transmembrane protein 255B
ENSG00000101474.12	1425.05970846153	0.588504889846597	0.128773932825131	0.326489872426796	APMAP	57136	adipocyte plasma membrane associated protein
ENSG00000076555.15	12.8355762608012	0.588142005167033	0.78884662435281	0.191260810846477	ACACB	32	acetyl-CoA carboxylase beta
ENSG00000102081.14	324.192968738619	0.588070558629866	0.198469853966981	0.266841219769493	FMR1	2332	FMRP translational regulator 1
ENSG00000138166.6	468.366309916474	0.58797052441935	0.172323645331764	0.283609710865689	DUSP5	1847	dual specificity phosphatase 5
ENSG00000107560.12	195.868530228102	0.587241691479154	0.655764714482934	0.19546278016677	RAB11FIP2	22841	RAB11 family interacting protein 2
ENSG00000239521.8	18.6453480863258	0.586914825742058	0.398544868431613	0.213976342990447	CASTOR3	352954	CASTOR family member 3
ENSG00000162894.12	37.3873616580563	0.586669635678785	0.361901402452156	0.219441186219937	FCMR	9214	Fc fragment of IgM receptor
ENSG00000173480.11	32.9113168352406	0.586555230065969	0.485284023381155	0.20486662459411	ZNF417	147687	zinc finger protein 417
ENSG00000083223.18	428.546702642887	0.586020122258098	0.121643354422602	0.345070714604245	TUT7	79670	terminal uridylyl transferase 7
ENSG00000156345.17	91.5989728173102	0.58591588859559	0.272678302622954	0.236835003570838	CDK20	23552	cyclin dependent kinase 20
ENSG00000256223.6	69.5480872084719	0.58562507716534	0.271955837672474	0.237162779995859	ZNF10	7556	zinc finger protein 10
ENSG00000271853.5	6.31089113361682	0.585535454255925	0.6309277683216	0.197278059118164	NA	NA	NA
ENSG00000173726.11	4841.43278269727	0.585461318260991	0.141000675055149	0.318808197441855	TOMM20	9804	translocase of outer mitochondrial membrane 20
ENSG00000008130.15	32.9522511128416	0.585427806830027	0.316906422117167	0.227625221052231	NADK	65220	NAD kinase
ENSG00000245958.6	59.6843345354227	0.585193715615111	0.224316022241654	0.25768952677378	SEPTIN7P14	645513	septin 7 pseudogene 14
ENSG00000236432.8	16.3417477147853	0.58505333974585	0.405478773907357	0.21419986615555	MFF-DT	654841	MFF divergent transcript
ENSG00000154237.13	72.2892673902222	0.584492631968721	0.241590593169803	0.250202564718334	LRRK1	79705	leucine rich repeat kinase 1
ENSG00000198551.10	161.156127001975	0.5843869129132	0.180937084778683	0.282807874108136	ZNF627	199692	zinc finger protein 627
ENSG00000134215.16	2.60628921913594	0.58425628181624	0.97130347600375	0.18933502440532	VAV3	10451	vav guanine nucleotide exchange factor 3
ENSG00000177337.8	66.2666865276783	0.582670907163875	0.349334643648799	0.223872418056476	NA	NA	NA
ENSG00000117533.15	229.438192219245	0.582579129404982	0.188306895068539	0.279988203840215	VAMP4	8674	vesicle associated membrane protein 4
ENSG00000074696.13	2814.34556211289	0.582178254098083	0.174981260212145	0.292714448989045	HACD3	51495	3-hydroxyacyl-CoA dehydratase 3
ENSG00000181104.7	446.062325684421	0.581994038765864	0.129697919725734	0.341632777494932	F2R	2149	coagulation factor II thrombin receptor
ENSG00000156171.14	3085.52988757868	0.581677011045363	0.0950189975925351	0.411738872721865	DRAM2	128338	DNA damage regulated autophagy modulator 2
ENSG00000176454.14	48.8712269635167	0.581013648850778	0.381704124842303	0.220327732365651	LPCAT4	254531	lysophosphatidylcholine acyltransferase 4
ENSG00000115446.11	350.261653703547	0.580937639989062	0.136577867623816	0.333683822739283	UNC50	25972	unc-50 inner nuclear membrane RNA binding protein
ENSG00000186594.14	300.406779255881	0.580855817145787	0.14091055495684	0.327499709484653	MIR22HG	84981	MIR22 host gene
ENSG00000144935.15	142.47941056371	0.580853634252556	0.237022711392878	0.257165810580317	TRPC1	7220	transient receptor potential cation channel subfamily C member 1
ENSG00000134905.17	22.3139381993983	0.580305138401463	0.489494669483393	0.207466831225952	CARS2	79587	cysteinyl-tRNA synthetase 2, mitochondrial
ENSG00000106244.13	307.772282200496	0.580242017185467	0.280412327073551	0.239670027466812	PDAP1	11333	PDGFA associated protein 1
ENSG00000139200.13	25.6412035556881	0.580117717422131	0.331387220471989	0.229163974828642	PIANP	196500	PILR alpha associated neural protein
ENSG00000180155.20	7.93249853389031	0.580096206278173	0.677281669526976	0.196937906463951	LYNX1	66004	Ly6/neurotoxin 1
ENSG00000237440.9	34.7003566365155	0.580083290273014	0.34436259050347	0.226302315991623	ZNF737	100129842	zinc finger protein 737
ENSG00000064961.19	8.53266661748928	0.580001785274871	0.654128469305804	0.197958608706662	HMG20B	10362	high mobility group 20B
ENSG00000166471.11	314.747569331289	0.579622179722359	0.126868430546893	0.352293051312195	TMEM41B	440026	transmembrane protein 41B
ENSG00000196391.11	16.1252487675216	0.579596448011272	0.535101623190441	0.204300975878162	ZNF774	342132	zinc finger protein 774
ENSG00000173517.10	598.216626052092	0.579151600553622	0.13072399100567	0.346997314371683	PEAK1	79834	pseudopodium enriched atypical kinase 1
ENSG00000063245.14	13.0574469812469	0.578710651083476	0.635318565973657	0.199655776815308	EPN1	29924	epsin 1
ENSG00000177096.9	8.7755514745046	0.578698101850476	0.547737314115657	0.203735042938227	PHETA2	150368	PH domain containing endocytic trafficking adaptor 2
ENSG00000163681.15	325.223417762037	0.578378582313402	0.158833668252598	0.314045210703994	SLMAP	7871	sarcolemma associated protein
ENSG00000185896.11	374.547488812933	0.578353398753543	0.123238247703779	0.360337092905007	LAMP1	3916	lysosomal associated membrane protein 1
ENSG00000005469.11	254.663150248141	0.57803018436412	0.136066862935857	0.341189871741714	CROT	54677	carnitine O-octanoyltransferase
ENSG00000144357.17	453.09258362403	0.577942370234147	0.134242375910268	0.34445607831484	UBR3	130507	ubiquitin protein ligase E3 component n-recognin 3
ENSG00000135916.16	74.6307026221725	0.577604589771428	0.22010144946635	0.269002383195197	ITM2C	81618	integral membrane protein 2C
ENSG00000166272.18	344.872724035329	0.577366644026794	0.157264386432957	0.31675745481652	WBP1L	54838	WW domain binding protein 1 like
ENSG00000173141.5	154.085164682836	0.577267793848771	0.171186317763952	0.302625610272049	MRPL57	78988	mitochondrial ribosomal protein L57
ENSG00000145014.17	21.7493744702547	0.577216650954148	0.418696713828034	0.216769743817963	TMEM44	93109	transmembrane protein 44
ENSG00000162783.11	184.742388759739	0.576764205366704	0.140106868403309	0.338881338481007	IER5	51278	immediate early response 5
ENSG00000197208.6	100.732731611506	0.576647211726689	0.235299438112454	0.262593454902875	SLC22A4	6583	solute carrier family 22 member 4
ENSG00000074964.17	7.16587154612101	0.576333054017338	0.575832367139993	0.202828111268659	ARHGEF10L	55160	Rho guanine nucleotide exchange factor 10 like
ENSG00000156232.7	102.590785265518	0.576297773561054	0.231592303791622	0.26435988059973	WHAMM	123720	WASP homolog associated with actin, golgi membranes and microtubules
ENSG00000109944.11	110.756940262032	0.576210382952154	0.222311801285184	0.270232375183148	JHY	79864	junctional cadherin complex regulator
ENSG00000198841.4	39.8863923522584	0.576017570500955	0.257241605429735	0.254013928817401	KTI12	112970	KTI12 chromatin associated homolog
ENSG00000011021.23	34.1931365955869	0.575943448347447	0.358849666203786	0.226523058689779	CLCN6	1185	chloride voltage-gated channel 6
ENSG00000110427.16	16.6093456112629	0.575513491631094	0.415595885986722	0.218664101766061	KIAA1549L	25758	KIAA1549 like
ENSG00000182240.16	307.187009984735	0.575453764379317	0.14488877858964	0.334494948941412	BACE2	25825	beta-secretase 2
ENSG00000178498.16	23.3673056228876	0.575035782918143	0.323302185818837	0.233657854323897	DTX3	196403	deltex E3 ubiquitin ligase 3
ENSG00000182389.19	7.83229830642151	0.574766982698946	0.749512730195089	0.195916753025162	CACNB4	785	calcium voltage-gated channel auxiliary subunit beta 4
ENSG00000241878.11	521.275844235698	0.574275402794939	0.191794526444629	0.292322888934867	PISD	23761	phosphatidylserine decarboxylase
ENSG00000151322.18	12.5886777439927	0.573883544933325	0.6462942685592	0.200334394397049	NPAS3	64067	neuronal PAS domain protein 3
ENSG00000243927.6	2284.75474872378	0.573797664544924	0.120268843224442	0.375034579659509	MRPS6	64968	mitochondrial ribosomal protein S6
ENSG00000090339.9	738.849916549212	0.57373145256607	0.101177448698274	0.419134497690028	ICAM1	3383	intercellular adhesion molecule 1
ENSG00000175183.10	8422.74396626585	0.57289793413158	0.111794430763276	0.39531754724246	CSRP2	1466	cysteine and glycine rich protein 2
ENSG00000088812.18	538.899362232685	0.572896105584778	0.105346036058756	0.410391628006072	ATRN	8455	attractin
ENSG00000107521.19	293.310587003279	0.572879088979399	0.127046074565209	0.366237470300713	HPS1	3257	HPS1 biogenesis of lysosomal organelles complex 3 subunit 1
ENSG00000101665.9	68.7279674918115	0.572335803948531	0.238860646821601	0.266222364769379	SMAD7	4092	SMAD family member 7
ENSG00000196199.14	816.89368020092	0.572229118610043	0.105178192880963	0.412931538314245	MPHOSPH8	54737	M-phase phosphoprotein 8
ENSG00000128731.17	266.651452480791	0.572161242275426	0.177621239492181	0.305221175793812	HERC2	8924	HECT and RLD domain containing E3 ubiquitin protein ligase 2
ENSG00000077254.14	657.638259647819	0.57206958390907	0.107006591731855	0.408663381954012	USP33	23032	ubiquitin specific peptidase 33
ENSG00000182841.12	9.72379801786504	0.571878803208492	0.589278259826279	0.203848264296237	RRP7BP	91695	ribosomal RNA processing 7 homolog B, pseudogene
ENSG00000128203.7	39.7719178987418	0.571771249126787	0.264313630286046	0.256431983623078	ASPHD2	57168	aspartate beta-hydroxylase domain containing 2
ENSG00000214688.6	6.8116570011979	0.571768326828613	0.576940142586977	0.204640339737966	C10orf105	414152	chromosome 10 open reading frame 105
ENSG00000197930.13	474.438854448609	0.571403896712951	0.099425744601727	0.432806806469782	ERO1A	30001	endoplasmic reticulum oxidoreductase 1 alpha
ENSG00000172985.11	15.2199565868018	0.57081351740536	0.48237561941294	0.213305427230728	SH3RF3	344558	SH3 domain containing ring finger 3
ENSG00000151632.17	819.763643235919	0.570626814509115	0.0912334251423761	0.464284407935856	AKR1C2	1646	aldo-keto reductase family 1 member C2
ENSG00000136536.15	702.572967055137	0.570251462124314	0.298462355933	0.245291973759418	MARCHF7	64844	membrane associated ring-CH-type finger 7
ENSG00000119537.18	668.139888635052	0.569435998765801	0.107046971128785	0.415380518310178	KDSR	2531	3-ketodihydrosphingosine reductase
ENSG00000104856.14	11.5726377597004	0.56917432833346	0.548739482168556	0.208143265175632	RELB	5971	RELB proto-oncogene, NF-kB subunit
ENSG00000112773.16	116.197583247488	0.568974349535604	0.333983223888131	0.235193249139357	TENT5A	55603	terminal nucleotidyltransferase 5A
ENSG00000259792.1	8.294897725959	0.56864929623739	0.554721710328164	0.207579671948264	NA	NA	NA
ENSG00000179526.17	20.6400248260909	0.568238580900092	0.497725492796111	0.212857265463922	SHARPIN	81858	SHANK associated RH domain interactor
ENSG00000287077.1	10.6282825492715	0.567736567693936	0.486945446449684	0.214646800109808	NA	NA	NA
ENSG00000145365.11	308.155983765724	0.567647414541854	0.189521950326319	0.302721975581692	TIFA	92610	TRAF interacting protein with forkhead associated domain
ENSG00000123384.14	175.080517007698	0.566318210599004	0.220060463655789	0.283108789346484	LRP1	4035	LDL receptor related protein 1
ENSG00000256618.2	179.306281284432	0.566131709823625	0.1821977881238	0.312071467877134	MTRNR2L1	100462977	MT-RNR2 like 1
ENSG00000236841.8	67.8120943840791	0.56577782072731	0.241367761933694	0.272988012354472	LOC101929532	101929532	uncharacterized LOC101929532
ENSG00000143036.17	44.978415972784	0.565379405200352	0.528682932971701	0.211623384558718	SLC44A3	126969	solute carrier family 44 member 3
ENSG00000152684.11	886.172084056836	0.565280006159351	0.163997680082918	0.330332463601623	PELO	53918	pelota mRNA surveillance and ribosome rescue factor
ENSG00000153707.17	418.245100859012	0.565213960679739	0.120520170240524	0.396018906231886	PTPRD	5789	protein tyrosine phosphatase receptor type D
ENSG00000109846.9	3133.44412844389	0.564471991696636	0.126131114213196	0.385670443912236	CRYAB	1410	crystallin alpha B
ENSG00000117594.10	137.63479652629	0.56442437694891	0.166042170419451	0.32932954760928	HSD11B1	3290	hydroxysteroid 11-beta dehydrogenase 1
ENSG00000119139.20	197.635208013622	0.564042985608079	0.148854679197137	0.35289626148203	TJP2	9414	tight junction protein 2
ENSG00000111846.17	18.6865037806056	0.56389208036231	0.474693168430358	0.217551310367068	GCNT2	2651	glucosaminyl (N-acetyl) transferase 2 (I blood group)
ENSG00000226380.9	57.1055575264442	0.563860035671923	0.528370216155744	0.212072050917557	NA	NA	NA
ENSG00000188157.15	8.2872601439771	0.563845673633732	0.63011040180866	0.204527165513842	AGRN	375790	agrin
ENSG00000164951.16	321.189849273807	0.563698794194575	0.106554410182791	0.435736112525696	PDP1	54704	pyruvate dehydrogenase phosphatase catalytic subunit 1
ENSG00000110717.13	170.682233711579	0.563611413232268	0.315248980215289	0.246684059859672	NDUFS8	4728	NADH:ubiquinone oxidoreductase core subunit S8
ENSG00000176749.9	9.83558781809301	0.563286433338362	0.527365842661319	0.212408790800306	CDK5R1	8851	cyclin dependent kinase 5 regulatory subunit 1
ENSG00000115216.14	132.124820447134	0.563254582087167	0.167492587069361	0.32996817242021	NRBP1	29959	nuclear receptor binding protein 1
ENSG00000077458.13	99.3735494602881	0.562945387715877	0.220976574236232	0.288286911141325	FAM76B	143684	family with sequence similarity 76 member B
ENSG00000170634.13	132.992961731364	0.562552793534922	0.196712029177378	0.30474127522882	ACYP2	98	acylphosphatase 2
ENSG00000019144.19	217.337723246392	0.562225957823337	0.230499772235296	0.281702349586461	PHLDB1	23187	pleckstrin homology like domain family B member 1
ENSG00000170190.16	12.1860279703041	0.562210678693451	0.52645162242534	0.213193449190854	SLC16A5	9121	solute carrier family 16 member 5
ENSG00000211455.8	132.351601847341	0.561429708198281	0.202357607611877	0.301853715239676	STK38L	23012	serine/threonine kinase 38 like
ENSG00000065029.15	51.7371309458798	0.561402161742888	0.333000617424554	0.242490298217468	ZNF76	7629	zinc finger protein 76
ENSG00000248441.7	13.8363974628036	0.561225412602008	0.472435784256129	0.220106195806587	LETR1	400456	lymphatic endothelial transcriptional regulator lncRNA 1
ENSG00000224058.2	8.97429752667378	0.561070866182395	0.518379177186242	0.214870052244319	NA	NA	NA
ENSG00000276293.4	350.702058921917	0.561009208108138	0.19247983924599	0.310937939028499	PIP4K2B	8396	phosphatidylinositol-5-phosphate 4-kinase type 2 beta
ENSG00000116922.14	165.098884740818	0.560934019408567	0.23102921675536	0.283709815176412	C1orf109	54955	chromosome 1 open reading frame 109
ENSG00000134882.16	216.972295146884	0.560892604726216	0.193451191096445	0.30989564485269	UBAC2	337867	UBA domain containing 2
ENSG00000204291.11	8.70957443083546	0.5606353184541	0.578691651153399	0.210053344984169	COL15A1	1306	collagen type XV alpha 1 chain
ENSG00000249669.10	120.321073624321	0.560294327326693	0.203476033786186	0.302818309893035	NA	NA	NA
ENSG00000186834.3	251.108788722134	0.560243786071366	0.120452355804039	0.40836202753997	HEXIM1	10614	HEXIM P-TEFb complex subunit 1
ENSG00000137414.6	304.676203214697	0.559920877412736	0.133047712215267	0.383095974060949	FAM8A1	51439	family with sequence similarity 8 member A1
ENSG00000164068.16	74.6813178834638	0.559806147877325	0.208224383279179	0.300113880559399	RNF123	63891	ring finger protein 123
ENSG00000133401.16	9.77840906354998	0.559631660789505	0.482126899758789	0.219552132126195	PDZD2	23037	PDZ domain containing 2
ENSG00000152818.18	369.094986886483	0.559042010300796	0.26151395170184	0.27156053311411	UTRN	7402	utrophin
ENSG00000125945.15	100.856452708245	0.558970510818261	0.175068619026049	0.328872657737759	ZNF436	80818	zinc finger protein 436
ENSG00000173706.14	2735.87260293249	0.558892886252598	0.0869554035907965	0.521748627388571	HEG1	57493	heart development protein with EGF like domains 1
ENSG00000165861.14	67.4114929924341	0.558289661451193	0.215809691584236	0.297883583648875	ZFYVE1	53349	zinc finger FYVE-type containing 1
ENSG00000153933.10	233.89557599702	0.558174046766609	0.15587163002201	0.354616550714189	DGKE	8526	diacylglycerol kinase epsilon
ENSG00000117862.13	1376.20706403833	0.558152856630573	0.12232401348794	0.409490722936927	TXNDC12	51060	thioredoxin domain containing 12
ENSG00000168852.13	30.842513891376	0.558026888162727	0.502210058815366	0.217328241877783	NA	NA	NA
ENSG00000182541.18	118.236902622845	0.557978949398016	0.176094455524066	0.329694651941455	LIMK2	3985	LIM domain kinase 2
ENSG00000188559.15	62.9723570728181	0.557850339878276	0.232285930166502	0.287891377327976	RALGAPA2	57186	Ral GTPase activating protein catalytic subunit alpha 2
ENSG00000155465.18	69.8198705814018	0.557835166441477	0.217818828856167	0.296912415866984	SLC7A7	9056	solute carrier family 7 member 7
ENSG00000069849.11	2469.27563586286	0.557572024768687	0.114562185601218	0.431051591536478	ATP1B3	483	ATPase Na+/K+ transporting subunit beta 3
ENSG00000258634.3	16.1087713681084	0.557149717161113	0.384119028028128	0.233877225565577	NA	NA	NA
ENSG00000243004.6	150.023840100496	0.556522786453106	0.175014940294531	0.334224824436664	NA	NA	NA
ENSG00000105877.18	23.7672851414002	0.55632994962922	0.402069439753293	0.23201418002292	DNAH11	8701	dynein axonemal heavy chain 11
ENSG00000254069.2	20.3845962726576	0.555214353176896	0.350066296593822	0.243354783054541	NA	NA	NA
ENSG00000243753.5	30.0205586999625	0.554671572661425	0.298387200140875	0.26092891881297	HLA-L	3139	major histocompatibility complex, class I, L (pseudogene)
ENSG00000188811.14	237.929874536342	0.554649479469271	0.183848662034092	0.327408051287007	NHLRC3	387921	NHL repeat containing 3
ENSG00000005073.6	17.5210253784773	0.554579146919016	0.425677860674371	0.229822270258481	HOXA11	3207	homeobox A11
ENSG00000108771.13	18.3016094352429	0.554461580022664	0.45697662364078	0.224977434507143	DHX58	79132	DExH-box helicase 58
ENSG00000267547.1	8.49930578696342	0.554389989117763	0.530034156215242	0.216211305579361	NA	NA	NA
ENSG00000060971.18	35.4524275293868	0.554335444172371	0.289571725858816	0.263632716652657	ACAA1	30	acetyl-CoA acyltransferase 1
ENSG00000148291.10	5.8963570856855	0.554241586356258	0.632728273436972	0.208030655668151	SURF2	6835	surfeit 2
ENSG00000246705.4	78.0097990335943	0.554231520070625	0.270446099470325	0.272580353003091	H2AJ	55766	H2A.J histone
ENSG00000116044.16	1514.97688058855	0.553792532776733	0.0823156746769612	0.564026990268493	NFE2L2	4780	nuclear factor, erythroid 2 like 2
ENSG00000105221.18	36.9980717163605	0.553214675192247	0.333116585073648	0.250415242604508	AKT2	208	AKT serine/threonine kinase 2
ENSG00000159579.14	434.375016677356	0.553171669956432	0.111777346588584	0.452283911114819	RSPRY1	89970	ring finger and SPRY domain containing 1
ENSG00000160285.15	110.684881102154	0.553149346034338	0.174528431549961	0.340657726231546	LSS	4047	lanosterol synthase
ENSG00000071894.17	25.9048731077302	0.552727915344002	0.460870736661886	0.225087999385657	CPSF1	29894	cleavage and polyadenylation specific factor 1
ENSG00000214944.9	87.3043517252692	0.552709635683746	0.204791973027815	0.314138908561837	ARHGEF28	64283	Rho guanine nucleotide exchange factor 28
ENSG00000130818.12	341.057474228701	0.552462746147012	0.16779472944187	0.350391818601625	ZNF426	79088	zinc finger protein 426
ENSG00000260942.1	12.2365034429386	0.552453395776053	0.434687727862949	0.229493274750492	CAPN10-DT	101752400	CAPN10 divergent transcript
ENSG00000197863.9	67.9205264812608	0.55234710914242	0.207461194789766	0.311694072833384	ZNF790	388536	zinc finger protein 790
ENSG00000152102.18	194.006621760244	0.552078438429698	0.215002841249369	0.305508884166445	FAM168B	130074	family with sequence similarity 168 member B
ENSG00000170100.13	33.1969038291915	0.552028080726604	0.39900365009336	0.23431594688974	ZNF778	197320	zinc finger protein 778
ENSG00000139637.14	326.701704234835	0.55185747436676	0.34157832469417	0.249031404776901	MYG1	60314	MYG1 exonuclease
ENSG00000230916.2	12.7379976669917	0.551852805954459	0.437453277493171	0.229383535660204	MTCO1P53	107075285	MT-CO1 pseudogene 53
ENSG00000264672.6	10.3757953384921	0.551401493333644	0.533669154002389	0.217104944904141	SEPTIN4-AS1	101927688	SEPTIN4 antisense RNA 1
ENSG00000173482.16	734.930708117454	0.551335421638615	0.118440445857839	0.438430262960078	PTPRM	5797	protein tyrosine phosphatase receptor type M
ENSG00000178585.15	24.1983210967744	0.551096291260984	0.335604790356044	0.252006182968887	CTNNBIP1	56998	catenin beta interacting protein 1
ENSG00000006606.8	34.6787439092981	0.550865924508128	0.300847730480164	0.26311298311937	CCL26	10344	C-C motif chemokine ligand 26
ENSG00000071242.12	89.7673187554939	0.550724716884419	0.208546212199619	0.313951479061365	RPS6KA2	6196	ribosomal protein S6 kinase A2
ENSG00000138629.16	144.781802197832	0.550660857295745	0.316365003401609	0.258317574504118	UBL7	84993	ubiquitin like 7
ENSG00000162409.11	37.1333798532905	0.550310331552718	0.311207235750181	0.259990600779654	PRKAA2	5563	protein kinase AMP-activated catalytic subunit alpha 2
ENSG00000102445.18	67.7019167751193	0.549943857905228	0.240122588266135	0.293008354122784	RUBCNL	80183	rubicon like autophagy enhancer
ENSG00000178381.12	387.086061464004	0.549808364791293	0.104075746326226	0.485218715624467	ZFAND2A	90637	zinc finger AN1-type containing 2A
ENSG00000089091.16	24.9619495676341	0.549788748037752	0.414035637119516	0.233219049114233	DZANK1	55184	double zinc ribbon and ankyrin repeat domains 1
ENSG00000212916.4	8.79846728129702	0.549764228570804	0.586682246537028	0.213529235197618	MAP10	54627	microtubule associated protein 10
ENSG00000125827.9	510.29383727672	0.549631493870143	0.095365777941049	0.517518872578754	TMX4	56255	thioredoxin related transmembrane protein 4
ENSG00000147439.13	301.480065031427	0.548531487819738	0.558363346914472	0.216099545605381	BIN3	55909	bridging integrator 3
ENSG00000270906.1	24.8220412224442	0.548129617914096	0.354264554154674	0.248711502996317	MTND4P35	107075117	MT-ND4 pseudogene 35
ENSG00000153982.11	72.3735451307123	0.547731298085815	0.293254354636391	0.269412887411016	GDPD1	284161	glycerophosphodiester phosphodiesterase domain containing 1
ENSG00000271133.5	8.06595470434324	0.54768937104673	0.549993149420881	0.217216623899307	ITGB8-AS1	101927811	ITGB8 antisense RNA 1
ENSG00000216937.13	28.2704752315436	0.547651032627479	0.539664567924192	0.21921927216235	CCDC7	79741	coiled-coil domain containing 7
ENSG00000159388.6	104.128862541406	0.547630975231121	0.173336223614197	0.352206832732884	BTG2	7832	BTG anti-proliferation factor 2
ENSG00000196586.16	1024.99693054649	0.547474779148511	0.0879518627004892	0.559897113848431	MYO6	4646	myosin VI
ENSG00000083642.19	370.548748692684	0.547474113128848	0.221355878125121	0.307421031665026	PDS5B	23047	PDS5 cohesin associated factor B
ENSG00000170113.16	229.168625942445	0.547369160243831	0.143998392773578	0.391790417794838	NIPA1	123606	NIPA magnesium transporter 1
ENSG00000101265.16	8.3235310987432	0.547246046446021	0.543875263773332	0.218775221463453	RASSF2	9770	Ras association domain family member 2
ENSG00000105991.9	23.9257966222498	0.547234137393602	0.33796097457917	0.254751679343625	HOXA1	3198	homeobox A1
ENSG00000141580.16	99.0835393203255	0.547141521657939	0.196906958915648	0.326305906400891	WDR45B	56270	WD repeat domain 45B
ENSG00000198478.8	163.498593181439	0.546574814784994	0.155832693916988	0.37437627662363	SH3BGRL2	83699	SH3 domain binding glutamate rich protein like 2
ENSG00000144843.11	7.58510283607029	0.54656856750767	0.592310807315708	0.214423365715918	ADPRH	141	ADP-ribosylarginine hydrolase
ENSG00000162407.9	35.6812417435554	0.546442151469555	0.356233750614439	0.249563855065384	PLPP3	8613	phospholipid phosphatase 3
ENSG00000134352.20	1769.24397474397	0.546439110300044	0.088419905525329	0.561530852974131	IL6ST	3572	interleukin 6 cytokine family signal transducer
ENSG00000169084.15	69.4271998255946	0.546341434109929	0.389890525981752	0.239887723118114	DHRSX	207063	dehydrogenase/reductase X-linked
ENSG00000104142.11	48.5922191734744	0.546267511902202	0.303064243517518	0.267047290887962	VPS18	57617	VPS18 core subunit of CORVET and HOPS complexes
ENSG00000171649.12	44.5179635325469	0.546148932857635	0.31583605533791	0.262177417534219	ZIK1	284307	zinc finger protein interacting with K protein 1
ENSG00000225465.9	8.28661428165374	0.546041410194301	0.639525775363627	0.210950297568437	NA	NA	NA
ENSG00000171295.13	68.1017673800303	0.546006711025033	0.277846492191679	0.276548373693924	ZNF440	126070	zinc finger protein 440
ENSG00000166086.13	398.324398349972	0.545988826397037	0.09915099062644	0.5143940323707	JAM3	83700	junctional adhesion molecule 3
ENSG00000181830.9	93.6408657260589	0.545749677837447	0.185835145586467	0.340746453756884	SLC35C1	55343	solute carrier family 35 member C1
ENSG00000159461.15	1044.64902309584	0.545232926877679	0.163363216927371	0.367324824076478	AMFR	267	autocrine motility factor receptor
ENSG00000287287.1	16.8554890375004	0.545186151391681	0.40871366360765	0.236944262247237	NA	NA	NA
ENSG00000117500.13	931.620336460782	0.544989630791331	0.128707809228001	0.42857770736367	TMED5	50999	transmembrane p24 trafficking protein 5
ENSG00000065802.12	209.680711739918	0.54491502417901	0.156358963432646	0.376921167679465	ASB1	51665	ankyrin repeat and SOCS box containing 1
ENSG00000180867.11	15.1819962737855	0.544874621388226	0.480426540789593	0.226743675706058	NA	NA	NA
ENSG00000167074.15	20.5554525308898	0.54487226142467	0.34593173148147	0.253802729033659	TEF	7008	TEF transcription factor, PAR bZIP family member
ENSG00000197312.12	110.711572544455	0.544606373938095	0.190294528346793	0.3385253876676	DDI2	84301	DNA damage inducible 1 homolog 2
ENSG00000166557.13	289.207388457265	0.544509568718974	0.17831017764505	0.351602609409269	TMED3	23423	transmembrane p24 trafficking protein 3
ENSG00000197016.12	36.1106375022781	0.544180315507624	0.540565431668721	0.220660045578543	ZNF470	388566	zinc finger protein 470
[truncated: 14,218 more rows]
