# Supplementary material for: Targeting Multiple Homeostasis-Maintaining Systems by Ionophore Nigericin Is a Novel Approach for Senolysis
Source: Int J Mol Sci. 2022 Nov 17;23(22):14251. doi: 10.3390/ijms232214251 (PMC9693507; doi:10.3390/ijms232214251)
Supplement: Supplementary file 1 [file ijms-23-14251-s001.zip › Supplementary Table S2.csv]

Targeting multiple homeostasis-maintaining systems by ionophore nigericin is a novel approach for senolysis
by Pavel I. Deryabin1, Alla N. Shatrova2, Aleksandra V. Borodkina1,*
1Mechanisms of cellular senescence group, Institute of Cytology of the Russian Academy of Sciences, Tikhoretsky Ave. 4, 194064, Saint-Petersburg, Russia 2Laboratory of intracellular membranes dynamic, Institute of Cytology of the Russian Academy of Sciences, Tikhoretsky Ave. 4, 194064, Saint-Petersburg, Russia
*Correspondence to Aleksandra V. Borodkina, Tikhoretsky ave. 4, 194064, St-Petersburg, Russia; borodkina618@gmail.com
Supplementary Table 2. GSEA results for differentially expressed genes from Supplementary Table 1 in Gene Ontology Biological Processes terms
	ID	Description	setSize	enrichmentScore	NES	pvalue	p.adjust	qvalues	rank	leading_edge	core_enrichment
GO:0000280	GO:0000280	nuclear division	349	-0.662587294758303	-2.77935409494937	2.29752176976166e-37	1.22825513811458e-33	9.89627271775233e-34	1770	tags=33%, list=13%, signal=29%	SMC2/RHOA/NPM2/CHMP4A/POGZ/PRKCA/RAD51B/SEH1L/NDC1/PDE3A/RIOK2/CEP85/ANAPC1/BOD1/KNSTRN/RAD51C/KPNB1/CCDC8/TOM1L1/ACTR2/P3H4/PRMT5/DRG1/MLH1/FLNA/CDC23/RANBP1/CDC25B/HASPIN/BCCIP/BANF1/ZNF207/CENPX/RPL24/INO80/FANCM/MZT1/KNTC1/RMDN1/ANAPC15/RAN/SMC4/KIF18A/AGO4/FANCA/CDC42/UBE2S/RAD54B/LMNA/EME1/RMI1/PSMC3IP/BUB3/CKS2/RAD51/BORA/SGO2/CENPE/CHEK1/NCAPG2/VRK1/FANCD2/PSRC1/FBXO5/KIF23/KIF20B/BRIP1/R…
GO:0007059	GO:0007059	chromosome segregation	278	-0.70496232183487	-2.87986634692307	8.44932430021692e-37	2.25850438544798e-33	1.81971763349935e-33	693	tags=25%, list=5%, signal=24%	CENPQ/ANAPC15/RAN/SMC4/KIF18A/AGO4/RPS3/CDC42/EME1/RMI1/SKA2/BUB3/RMI2/CENPW/SGO2/CENPE/NCAPG2/BRCA1/FEN1/FANCD2/PSRC1/FBXO5/KIF23/BRIP1/RACGAP1/MAD2L1/SPDL1/CENPK/CDCA5/TRIP13/NUF2/KIF18B/CCNB1/CDC6/CCNE2/PLK1/BUB1B/SGO1/HJURP/PRC1/SKA3/CENPN/PTTG1/SPAG5/MKI67/ZWINT/NCAPG/CDCA2/CDCA8/AURKB/NUSAP1/NDC80/CENPF/BUB1/TOP2A/NCAPH/CDC20/BIRC5/TTK/ESCO2/KIF14/UBE2C/KIF2C/NEK2/KIF4A/SKA1/SPC25/KNL1/DLGA…
GO:0048285	GO:0048285	organelle fission	394	-0.623358805284909	-2.63030868350261	6.30613219724272e-32	1.12375275754865e-28	9.05427822846218e-29	1770	tags=30%, list=13%, signal=27%	SMC2/RHOA/NPM2/CHMP4A/POGZ/PRKCA/RAD51B/SEH1L/NDC1/PDE3A/RIOK2/CEP85/ANAPC1/BOD1/KNSTRN/RAD51C/KPNB1/CCDC8/TOM1L1/CYRIB/ACTR2/P3H4/PRMT5/DRG1/MLH1/FLNA/CDC23/TMEM135/RANBP1/CDC25B/HASPIN/BCCIP/BANF1/ZNF207/CENPX/RPL24/INO80/FANCM/MZT1/KNTC1/RMDN1/CORO1C/ANAPC15/MYO19/RAN/SMC4/KIF18A/AGO4/FANCA/CDC42/UBE2S/RAD54B/LMNA/EME1/RMI1/PSMC3IP/BUB3/CKS2/RAD51/BORA/SGO2/CENPE/CHEK1/NCAPG2/VRK1/MTFR2/FANCD2…
GO:0140014	GO:0140014	mitotic nuclear division	263	-0.687198567209066	-2.79794287046841	1.77682933311926e-31	2.37473240371389e-28	1.91336463976948e-28	1770	tags=34%, list=13%, signal=30%	SMC2/RHOA/NPM2/CHMP4A/POGZ/PRKCA/SEH1L/RIOK2/CEP85/ANAPC1/BOD1/KNSTRN/KPNB1/CCDC8/TOM1L1/PRMT5/DRG1/FLNA/CDC23/RANBP1/HASPIN/BCCIP/BANF1/ZNF207/RPL24/INO80/MZT1/KNTC1/RMDN1/ANAPC15/RAN/SMC4/KIF18A/CDC42/UBE2S/LMNA/BUB3/BORA/SGO2/CENPE/CHEK1/NCAPG2/VRK1/PSRC1/FBXO5/KIF23/KIF20B/RACGAP1/EGF/MAD2L1/AURKA/TPX2/SPDL1/CENPK/CDCA5/TRIP13/NUF2/KIF11/KIF18B/CCNB1/CDC6/PLK1/BUB1B/SGO1/PRC1/PTTG1/SPAG5/MKI6…
GO:0044772	GO:0044772	mitotic cell cycle phase transition	499	-0.581409193251215	-2.49988152439428	2.61810475038144e-31	2.79927759910783e-28	2.25542834496018e-28	1922	tags=31%, list=14%, signal=28%	CEP41/SMC5/MDM4/CNOT9/AVEN/CDKN2B/CKAP5/PSMC5/CTDSPL/PSMC6/CNOT2/NPM2/TAF10/PSME3/RAD51B/RIOK2/ANAPC1/PSMB4/CDC25A/PSMA1/PSME2/CDK6/RAD51C/PSMB6/NASP/PSMA2/YWHAE/CALM3/RPTOR/EIF4EBP1/BTRC/PCBP4/PAFAH1B1/MASTL/CEP135/TP53/KHDRBS1/POLA2/TOPBP1/PSMD14/PSMD11/CDC23/DYNLL1/PRMT1/RPL26/BLM/GSPT1/PSMA6/PSMA3/PSMB5/CDC25B/PSMB3/PSMC2/ZNF207/PSMB7/RPL24/INO80/PSMC1/CEP43/TFDP1/MCM6/EIF4E/KNTC1/CNTRL/PLRG1…
GO:0098813	GO:0098813	nuclear chromosome segregation	219	-0.710617884401763	-2.81823624181221	3.18386949531173e-30	2.83682772032275e-27	2.28568315347642e-27	693	tags=26%, list=5%, signal=25%	CENPQ/ANAPC15/RAN/SMC4/KIF18A/AGO4/CDC42/EME1/RMI1/BUB3/RMI2/SGO2/CENPE/NCAPG2/FEN1/FANCD2/PSRC1/FBXO5/KIF23/BRIP1/RACGAP1/MAD2L1/SPDL1/CENPK/CDCA5/TRIP13/NUF2/KIF18B/CCNB1/CDC6/CCNE2/PLK1/BUB1B/SGO1/PRC1/PTTG1/SPAG5/ZWINT/NCAPG/CDCA8/AURKB/NUSAP1/NDC80/CENPF/BUB1/TOP2A/NCAPH/CDC20/TTK/ESCO2/KIF14/UBE2C/KIF2C/NEK2/KIF4A/KNL1/DLGAP5
GO:0000819	GO:0000819	sister chromatid segregation	172	-0.755279391125886	-2.92815199057963	6.12374367685708e-30	4.67679052806828e-27	3.76817430461642e-27	363	tags=28%, list=3%, signal=28%	ANAPC15/RAN/SMC4/KIF18A/BUB3/RMI2/SGO2/CENPE/NCAPG2/FEN1/PSRC1/FBXO5/KIF23/RACGAP1/MAD2L1/SPDL1/CENPK/CDCA5/TRIP13/NUF2/KIF18B/CCNB1/CDC6/PLK1/BUB1B/SGO1/PRC1/PTTG1/SPAG5/ZWINT/NCAPG/CDCA8/AURKB/NUSAP1/NDC80/CENPF/BUB1/TOP2A/NCAPH/CDC20/TTK/ESCO2/KIF14/UBE2C/KIF2C/NEK2/KIF4A/DLGAP5
GO:0000070	GO:0000070	mitotic sister chromatid segregation	149	-0.766635138729634	-2.89977927860901	3.96419408482555e-28	2.64907269718467e-25	2.13440555198765e-25	671	tags=30%, list=5%, signal=28%	ANAPC15/RAN/SMC4/KIF18A/BUB3/SGO2/CENPE/NCAPG2/PSRC1/FBXO5/KIF23/RACGAP1/MAD2L1/SPDL1/CENPK/CDCA5/TRIP13/NUF2/KIF18B/CCNB1/CDC6/PLK1/BUB1B/SGO1/PRC1/PTTG1/SPAG5/ZWINT/NCAPG/CDCA8/AURKB/NUSAP1/NDC80/CENPF/BUB1/NCAPH/CDC20/TTK/KIF14/UBE2C/KIF2C/NEK2/KIF4A/DLGAP5
GO:0006260	GO:0006260	DNA replication	257	-0.659029443441294	-2.66761849117863	3.75501030758013e-26	2.2304761227026e-23	1.79713475773309e-23	1401	tags=35%, list=10%, signal=32%	NPM2/RBBP4/SET/MGME1/CDK2AP1/NUCKS1/NASP/ZMPSTE24/TP53/POLA2/GTPBP4/TOPBP1/RAD9B/BLM/SSRP1/DTD1/WDHD1/CENPX/INO80/FANCM/MCM6/PCNA/CDK2/TIMELESS/POLD3/CACYBP/RRM1/CHAF1A/MCM3/LIG3/ZGRF1/RFC5/ING5/CDC42/SSBP1/MCMDC2/MCM5/ATAD5/PTMS/RPA3/EME1/RMI1/ORC6/RMI2/CHTF18/MCM2/ZRANB3/GMNN/RAD51/RNASEH2A/DNA2/RFC2/CHEK1/BRCA1/FEN1/RFC3/RFC4/PRIM1/MCM7/CDC7/TRAIP/FBXO5/GINS1/MCM4/BRIP1/E2F7/GINS4/MMS22L/EGF/P…
GO:0006281	GO:0006281	DNA repair	497	-0.530628278115965	-2.27821158836094	3.99232171890092e-22	2.13429519092443e-19	1.71964004986764e-19	2254	tags=32%, list=16%, signal=27%	SUPT16H/NBN/KDM1A/OTUB1/RHNO1/NSMCE1/CENPS/XAB2/POLH/RAD23B/CDC5L/HSF2BP/UBB/MSH2/GTF2H5/CHEK2/SFPQ/ERCC8/MCM8/SMC5/LOC100133315/DEK/SHLD2/SMC1A/FANCC/UFD1/INIP/RAD51B/FANCL/NONO/XRCC4/COPS5/TDG/MGME1/RAD51C/TWIST1/NUCKS1/CGAS/POLR2G/ZMPSTE24/PMS2P1/ACTR2/XRCC5/PIAS4/PMS1/COPS6/TP53/MLH1/TOPBP1/RUVBL2/SUMO1/MORF4L1/PSMD14/RAD9B/COMMD1/HMGB1/PRMT6/BLM/DCLRE1C/COPS4/SSRP1/EYA3/BCCIP/ACTL6A/TTC5/WDH…
GO:0007346	GO:0007346	regulation of mitotic cell cycle	499	-0.521516141695978	-2.24235973980524	5.75205972381588e-21	2.79550102577452e-18	2.25238549185211e-18	1933	tags=28%, list=14%, signal=25%	ATF2/CEP41/PNPT1/MDM4/CNOT9/AVEN/CDKN2B/CKAP5/SLC9A3R1/PSMC5/CTDSPL/PSMC6/CNOT2/NPM2/PRKCA/PSME3/RAD51B/RIOK2/ANAPC1/PSMB4/CDC25A/PSMA1/PSME2/CDK6/RAD51C/PSMB6/CCDC8/PSMA2/TOM1L1/YWHAE/ZMPSTE24/RPTOR/EIF4EBP1/BTG1/BTRC/PCBP4/PAFAH1B1/CEP135/PRMT5/TP53/TOPBP1/PSMD14/RAD9B/PSMD11/CDC23/DYNLL1/PRMT1/RPL26/BLM/PSMA6/PSMA3/PSMB5/CDC25B/PSMB3/INTS13/PSMC2/ZNF207/PSMB7/INO80/PSMC1/CEP43/TFDP1/HES1/EIF4E…
GO:0000226	GO:0000226	microtubule cytoskeleton organization	460	-0.526698450137063	-2.25020094543547	3.62500642243606e-20	1.61494036119527e-17	1.30118651584284e-17	1448	tags=21%, list=10%, signal=19%	EML1/TUBB2A/PAFAH1B1/CEP135/HYDIN/DRG1/MLH1/PRKAA1/FLNA/EZR/TUBB3/EFNA5/RANBP1/INTS13/BCCIP/DYNLT1/GPSM2/DNAL1/POC1B/ZNF207/INO80/CEP43/MZT1/RMDN1/KIF24/MAP7D3/HAUS8/AUNIP/CDK2/MYH9/CCDC65/RAN/CFL1/KIF18A/TTC12/TTLL4/RPS3/MAPRE1/NPM1/STIL/LMNA/RBM14/MID1/TTC26/SKA2/XRCC2/STMN1/DNAH5/GAS2L3/CCNF/CENPA/BORA/TUBB/CENPE/CHEK1/BRCA1/TUBA1C/TUBA1A/PSRC1/FBXO5/KIF23/RACGAP1/MAD2L1/AURKA/TUBA1B/TPX2/BRCA…
GO:1901987	GO:1901987	regulation of cell cycle phase transition	393	-0.543311795466362	-2.28920862037843	2.77234341846932e-19	1.140072916549e-16	9.1857726869445e-17	1882	tags=29%, list=13%, signal=26%	MDM4/CNOT9/AVEN/CDKN2B/CKAP5/PSMC5/CTDSPL/PSMC6/CNOT2/NPM2/PSME3/RAD51B/SUSD2/RIOK2/ANAPC1/PSMB4/CDC25A/PSMA1/PSME2/CDK6/RAD51C/PSMB6/PSMA2/YWHAE/RPTOR/BTRC/PCBP4/PAFAH1B1/CEP135/TP53/TOPBP1/PSMD14/PSMD11/CDC23/DYNLL1/PRMT1/RPL26/BLM/PSMA6/PSMA3/PSMB5/CDC25B/PSMB3/PSMC2/ZNF207/PSMB7/INO80/PSMC1/CEP43/TFDP1/KNTC1/CNTRL/PLRG1/ANXA1/RBX1/HAUS8/PSMB1/PCNA/PSMB9/PSMA5/STXBP4/CDK2/CASP2/PSMB2/ANAPC15/K…
GO:1901990	GO:1901990	regulation of mitotic cell cycle phase transition	365	-0.557771503702793	-2.34745749919198	3.85434251561854e-19	1.47180822060691e-16	1.18586237397828e-16	1882	tags=30%, list=13%, signal=27%	MDM4/CNOT9/AVEN/CDKN2B/CKAP5/PSMC5/CTDSPL/PSMC6/CNOT2/NPM2/PSME3/RAD51B/RIOK2/ANAPC1/PSMB4/CDC25A/PSMA1/PSME2/CDK6/RAD51C/PSMB6/PSMA2/YWHAE/RPTOR/BTRC/PCBP4/PAFAH1B1/CEP135/TP53/TOPBP1/PSMD14/PSMD11/CDC23/DYNLL1/PRMT1/RPL26/BLM/PSMA6/PSMA3/PSMB5/CDC25B/PSMB3/PSMC2/ZNF207/PSMB7/INO80/PSMC1/CEP43/TFDP1/KNTC1/CNTRL/PLRG1/ANXA1/RBX1/HAUS8/PSMB1/PCNA/PSMB9/PSMA5/CDK2/CASP2/PSMB2/ANAPC15/KLHL18/PSMA4/M…
GO:0006261	GO:0006261	DNA-dependent DNA replication	143	-0.68986108671307	-2.59291301317264	9.58379810320547e-18	3.41566564398243e-15	2.75206328689942e-15	1068	tags=38%, list=8%, signal=35%	MGME1/CDK2AP1/NUCKS1/ZMPSTE24/POLA2/TOPBP1/BLM/WDHD1/CENPX/INO80/FANCM/MCM6/PCNA/TIMELESS/POLD3/MCM3/LIG3/ZGRF1/RFC5/SSBP1/MCMDC2/MCM5/RPA3/EME1/ORC6/CHTF18/MCM2/ZRANB3/GMNN/RAD51/DNA2/RFC2/FEN1/RFC3/RFC4/PRIM1/MCM7/CDC7/TRAIP/FBXO5/GINS1/MCM4/E2F7/GINS4/MMS22L/POLQ/BRCA2/POLE2/CDC6/CCNE2/ORC1/CDC45/MCM10/GINS2
GO:0006413	GO:0006413	translational initiation	181	-0.652956933391749	-2.54463102583407	2.08054173408942e-17	6.95161006902626e-15	5.60103735256177e-15	2015	tags=50%, list=14%, signal=44%	RBM4/EIF3D/TMED2/NCBP1/RPS5/EIF3E/COPS5/EIF3H/POLR2G/EIF4EBP1/EIF3L/RPL34/KHDRBS1/C8orf88/RPL5/RPL19/RPL31/EIF1AD/RPL12/RPL35A/RPL26/RPL15/RPL27A/EIF2A/RPL41/RPL22/EIF2B3/RPL38/PPP1R15B/RPS8/RPL39/RPS2/RPL24/RPL17/RPS25/EIF4E/RPS18/EIF4A1/EIF3M/ABCE1/RPS24/RPL14/RPL36A/RPL37/RPL30/UBA52/RPS20/RPL11/RPL9/RPS13/RPL23/RPL37A/EIF2S3/DDX1/RPS15A/RPS27/DHX33/RPS17/RPS4X/EIF6/RPS12/EIF3J/RPL21/RPL7A/EIF…
GO:0044839	GO:0044839	cell cycle G2/M phase transition	248	-0.590912484459652	-2.38246949171537	4.70536967030477e-17	1.47970036808525e-14	1.19222121924998e-14	2058	tags=35%, list=15%, signal=30%	DBF4B/PSMD10/PSMD3/CHEK2/PPP1R12A/CEP41/AVEN/CDKN2B/CKAP5/PSMC5/PSMC6/PSME3/RAD51B/PSMB4/CDC25A/PSMA1/PSME2/RAD51C/PSMB6/PSMA2/YWHAE/CALM3/BTRC/PAFAH1B1/MASTL/CEP135/TP53/KHDRBS1/TOPBP1/PSMD14/PSMD11/DYNLL1/BLM/PSMA6/PSMA3/PSMB5/CDC25B/PSMB3/PSMC2/PSMB7/PSMC1/CEP43/CNTRL/RBX1/HAUS8/PSMB1/PSMB9/PSMA5/CDK2/PSMB2/PSMA4/MAPRE1/NPM1/ATAD5/ACTR1A/ENSA/FHL1/BORA/TUBB/CHEK1/BRCA1/SKP2/TUBA1A/CDC7/FBXO5/A…
GO:0007088	GO:0007088	regulation of mitotic nuclear division	94	-0.751637144500894	-2.67748724283911	6.27104958154029e-17	1.86250172571747e-14	1.50065116302122e-14	363	tags=29%, list=3%, signal=28%	ANAPC15/CDC42/BUB3/BORA/CHEK1/FBXO5/KIF20B/EGF/MAD2L1/AURKA/SPDL1/TRIP13/CCNB1/PLK1/BUB1B/MKI67/ZWINT/AURKB/NUSAP1/NDC80/CDC25C/CENPF/BUB1/CDC20/TTK/NEK2/DLGAP5
GO:0007051	GO:0007051	spindle organization	162	-0.662753562245027	-2.55463977325429	7.95182449736154e-17	2.15705815119338e-14	1.73798057666003e-14	1448	tags=28%, list=10%, signal=25%	EML1/DRG1/MLH1/FLNA/EZR/INTS13/BCCIP/GPSM2/ZNF207/INO80/MZT1/RMDN1/HAUS8/AUNIP/MYH9/RAN/RPS3/MAPRE1/STIL/STMN1/BORA/TUBB/CENPE/PSRC1/FBXO5/KIF23/RACGAP1/AURKA/TPX2/NUF2/KIF11/CCNB1/PLK1/PRC1/SPAG5/AURKB/NDC80/CDC20/CCNB2/ASPM/TTK/NEK2/KIF4A/SPC25/DLGAP5
GO:0006310	GO:0006310	DNA recombination	230	-0.601879685242524	-2.39931198711467	8.06980228654461e-17	2.15705815119338e-14	1.73798057666003e-14	2414	tags=39%, list=17%, signal=33%	RBBP8/HUS1/XRCC6/RAD21/CNTD1/ALYREF/NBN/KDM1A/RHNO1/NSMCE1/CENPS/HSF2BP/IHO1/MSH2/SFPQ/MCM8/SMC5/TPRKB/SHLD2/RAD51B/NONO/XRCC4/KPNA1/RAD51C/NUCKS1/CGAS/ACTR2/XRCC5/MLH1/RUVBL2/MORF4L1/PSMD14/HMGB1/TNFSF4/BLM/DCLRE1C/ACTL6A/CENPX/INO80/TSN/FANCM/MCM6/UBE2N/HSPD1/AUNIP/TIMELESS/HMGB3/PARP1/MCM3/LIG3/PARPBP/PPP4R2/MCMDC2/RAD54B/MCM5/RPA3/EME1/RMI1/FANCB/XRCC2/PSMC3IP/PTPRC/SHLD1/RMI2/AP5S1/KPNA2/MCM…
GO:0051783	GO:0051783	regulation of nuclear division	108	-0.730353051076746	-2.66049358958989	1.00751455060601e-16	2.56484418454273e-14	2.06654112334826e-14	363	tags=24%, list=3%, signal=24%	BUB3/BORA/CHEK1/FBXO5/KIF20B/EGF/MAD2L1/AURKA/SPDL1/TRIP13/CCNB1/PLK1/BUB1B/RAD51AP1/MKI67/ZWINT/AURKB/NUSAP1/NDC80/CDC25C/CENPF/BUB1/CDC20/TTK/NEK2/DLGAP5
GO:0051983	GO:0051983	regulation of chromosome segregation	77	-0.78773506539006	-2.71410604192866	2.50819402518484e-16	5.94353599586402e-14	4.78881392779167e-14	363	tags=30%, list=3%, signal=29%	BUB3/RMI2/CENPE/FBXO5/MAD2L1/SPDL1/TRIP13/CCNB1/CDC6/PLK1/BUB1B/PTTG1/MKI67/ZWINT/AURKB/NDC80/CENPF/BUB1/CDC20/TTK/UBE2C/KIF2C/DLGAP5
GO:0000086	GO:0000086	G2/M transition of mitotic cell cycle	230	-0.596798863627197	-2.37905797870578	2.55707684071965e-16	5.94353599586402e-14	4.78881392779167e-14	2058	tags=36%, list=15%, signal=31%	DBF4B/PSMD10/PSMD3/CHEK2/PPP1R12A/CEP41/AVEN/CDKN2B/CKAP5/PSMC5/PSMC6/PSME3/RAD51B/PSMB4/CDC25A/PSMA1/PSME2/RAD51C/PSMB6/PSMA2/YWHAE/CALM3/BTRC/PAFAH1B1/MASTL/CEP135/KHDRBS1/TOPBP1/PSMD14/PSMD11/DYNLL1/BLM/PSMA6/PSMA3/PSMB5/CDC25B/PSMB3/PSMC2/PSMB7/PSMC1/CEP43/CNTRL/RBX1/HAUS8/PSMB1/PSMB9/PSMA5/CDK2/PSMB2/PSMA4/MAPRE1/ACTR1A/ENSA/FHL1/BORA/TUBB/CHEK1/BRCA1/SKP2/TUBA1A/CDC7/FBXO5/AURKA/TPX2/CCNA2/…
GO:0006401	GO:0006401	RNA catabolic process	373	-0.527081786389251	-2.21740769893886	7.95036349754886e-16	1.77094346907901e-13	1.42688102771798e-13	2045	tags=37%, list=15%, signal=32%	PSMD10/UBB/PSMD3/DIS3L2/HBS1L/LSM5/PRPF18/THRAP3/PNPT1/SERBP1/CNOT9/NCBP1/PSMC5/EXOSC7/PSMC6/CNOT2/FASTKD2/TARDBP/RPS5/PRKCA/PSME3/EIF3E/SET/ZFP36/PSMB4/YWHAZ/PSMA1/PSME2/PSMB6/VIM/PSMA2/EIF4A3/POLR2G/PCBP4/DCP1A/RPL34/MLH1/RPL5/RPL19/RPL31/PSMD14/PSMD11/RPL12/RPL35A/RPL26/RPL15/RPL27A/RPL41/RPL22/GSPT1/PSMA6/PSMA3/PSMB5/PSMB3/NBDY/PSMC2/LSM3/RPL38/RPS8/RPL39/RPS2/PSMB7/RPL24/PSMC1/ELAVL1/WDR61/R…
GO:0006302	GO:0006302	double-strand break repair	230	-0.591355996634715	-2.35736072535178	8.32271016784691e-16	1.77972834229238e-13	1.4339591581823e-13	2414	tags=39%, list=17%, signal=33%	RBBP8/HUS1/XRCC6/RAD21/BRCC3/POLA1/NBN/KDM1A/OTUB1/NSMCE1/HSF2BP/MSH2/CHEK2/SFPQ/ERCC8/MCM8/SMC5/DEK/SHLD2/RAD51B/XRCC4/RAD51C/TWIST1/NUCKS1/CGAS/ACTR2/XRCC5/PIAS4/TP53/MLH1/SUMO1/MORF4L1/PSMD14/HMGB1/BLM/DCLRE1C/EYA3/INO80/FANCM/MCM6/UBE2N/UBE2V2/OGG1/NHEJ1/DDX1/AUNIP/TIMELESS/PARP1/MCM3/LIG3/PARPBP/PPP4R2/MCMDC2/RAD54B/MCM5/RPA3/EME1/RMI1/FANCB/XRCC2/SHLD1/RMI2/AP5S1/MCM2/RAD51/DNA2/CHEK1/BRCA1…
GO:0006613	GO:0006613	cotranslational protein targeting to membrane	102	-0.73064363478974	-2.64819085675845	8.90722140521846e-16	1.80388353753337e-13	1.45342143375009e-13	1399	tags=60%, list=10%, signal=54%	RPL34/RPL5/RPL19/RPL31/RPL12/RPL35A/RPL26/RPL15/RPL27A/RPL41/RPL22/RPL38/RPS8/RPL39/RPS2/RPL24/RPL17/RPS25/RPS18/RPS24/RPL14/RPL36A/RPL37/RPL30/UBA52/RPS20/RPL11/RPL9/RPS13/RPL23/RPL37A/RPS15A/RPS27/RPS17/RPS4X/RPS12/SSR1/RPL21/RPL7A/RPL32/RPL7/RPS6/RPS3A/RPS26/RPS29/RPS21/RPL4/RPL23A/RPS16/RPL27/RPS27A/RPS11/RPS3/RPS7/RPL10A/SSR2/RPL6/RPL10/RPS23/RPLP0/RPSA
GO:0010948	GO:0010948	negative regulation of cell cycle process	292	-0.558649567683329	-2.29025789175955	9.11052291683522e-16	1.80388353753337e-13	1.45342143375009e-13	1882	tags=34%, list=13%, signal=30%	NBN/RBBP7/SLFN11/PSMA7/TRIAP1/CNOT6/DONSON/EHMT1/PSMD10/PSMD3/CHEK2/MDM4/CNOT9/AVEN/CDKN2B/PSMC5/CTDSPL/PSMC6/CNOT2/PSME3/RBBP4/SUSD2/PSMB4/PSMA1/PSME2/CDK6/PSMB6/PSMA2/TOM1L1/PCBP4/TP53/TOPBP1/PSMD14/PSMD11/PRMT1/RPL26/BLM/PSMA6/PSMA3/PSMB5/PSMB3/PSMC2/ZNF207/PSMB7/PSMC1/TFDP1/KNTC1/RPL23/RBX1/PSMB1/PCNA/PSMB9/PSMA5/CDK2/CASP2/PSMB2/ANAPC15/HSP90AB1/PSMA4/NPM1/RBM14/CBX5/BUB3/FHL1/RAD51/CCNF/CDK…
GO:0006614	GO:0006614	SRP-dependent cotranslational protein targeting to membrane	97	-0.733002855164774	-2.61784944625066	1.16188217414424e-15	2.21836503677683e-13	1.78737663781889e-13	1399	tags=61%, list=10%, signal=55%	RPL34/RPL5/RPL19/RPL31/RPL12/RPL35A/RPL26/RPL15/RPL27A/RPL41/RPL22/RPL38/RPS8/RPL39/RPS2/RPL24/RPL17/RPS25/RPS18/RPS24/RPL14/RPL36A/RPL37/RPL30/UBA52/RPS20/RPL11/RPL9/RPS13/RPL23/RPL37A/RPS15A/RPS27/RPS17/RPS4X/RPS12/RPL21/RPL7A/RPL32/RPL7/RPS6/RPS3A/RPS26/RPS29/RPS21/RPL4/RPL23A/RPS16/RPL27/RPS27A/RPS11/RPS3/RPS7/RPL10A/RPL6/RPL10/RPS23/RPLP0/RPSA
GO:1902850	GO:1902850	microtubule cytoskeleton organization involved in mitosis	129	-0.685994834292841	-2.5401402075549	1.34353466898191e-15	2.47673666909561e-13	1.99555131233175e-13	1448	tags=29%, list=10%, signal=27%	EML1/PAFAH1B1/DRG1/FLNA/INTS13/BCCIP/DYNLT1/GPSM2/ZNF207/MZT1/RMDN1/RAN/STIL/STMN1/CENPA/BORA/CENPE/PSRC1/KIF23/RACGAP1/MAD2L1/AURKA/TPX2/SPDL1/NUF2/KIF11/CCNB1/PLK1/PRC1/AURKB/NUSAP1/NDC80/CDC20/TTK/NEK2/KIF4A/SPC25/DLGAP5
GO:0010965	GO:0010965	regulation of mitotic sister chromatid separation	58	-0.818991008602805	-2.68714112518003	1.7071863411828e-15	3.04220605998774e-13	2.45116017828772e-13	363	tags=34%, list=3%, signal=34%	BUB3/CENPE/FBXO5/MAD2L1/SPDL1/TRIP13/CCNB1/CDC6/PLK1/BUB1B/PTTG1/ZWINT/AURKB/NDC80/CENPF/BUB1/CDC20/TTK/UBE2C/DLGAP5
GO:0051304	GO:0051304	chromosome separation	81	-0.76409838519336	-2.65429416485782	2.62816981173538e-15	4.53232123017333e-13	3.65177279104284e-13	404	tags=35%, list=3%, signal=34%	ZNF207/CENPX/FANCM/KNTC1/ANAPC15/EME1/RMI1/BUB3/CENPE/FBXO5/MAD2L1/SPDL1/TRIP13/CCNB1/CDC6/PLK1/BUB1B/PTTG1/ZWINT/AURKB/NDC80/CENPF/BUB1/TOP2A/CDC20/TTK/UBE2C/DLGAP5
GO:0000184	GO:0000184	nuclear-transcribed mRNA catabolic process, nonsense-mediated decay	118	-0.694683500817284	-2.55341978573339	2.73636895118702e-15	4.57144637907681e-13	3.68329662771621e-13	1728	tags=57%, list=12%, signal=50%	RPS5/EIF3E/EIF4A3/DCP1A/RPL34/RPL5/RPL19/RPL31/RPL12/RPL35A/RPL26/RPL15/RPL27A/RPL41/RPL22/GSPT1/RPL38/RPS8/RPL39/RPS2/RPL24/RPL17/RPS25/RPS18/RBM8A/RPS24/MAGOHB/RPL14/RPL36A/RPL37/RPL30/UBA52/RPS20/RPL11/RPL9/RPS13/RPL23/RPL37A/RPS15A/RPS27/RPS17/RPS4X/RPS12/RPL21/RPL7A/RPL32/RPL7/RPS6/RPS3A/RPS26/RPS29/RPS21/RPL4/RPL23A/RPS16/RPL27/RPS27A/RPS11/MAGOH/RPS3/RPS7/RPL10A/RPL6/RPL10/RPS23/RPLP0/RPSA
GO:0051306	GO:0051306	mitotic sister chromatid separation	60	-0.812655816109522	-2.68472519320081	3.17954353337232e-15	5.15086052406316e-13	4.15014103303334e-13	363	tags=33%, list=3%, signal=33%	BUB3/CENPE/FBXO5/MAD2L1/SPDL1/TRIP13/CCNB1/CDC6/PLK1/BUB1B/PTTG1/ZWINT/AURKB/NDC80/CENPF/BUB1/CDC20/TTK/UBE2C/DLGAP5
GO:0033045	GO:0033045	regulation of sister chromatid segregation	63	-0.803247192998383	-2.66399227568825	3.38002089985556e-15	5.31458580312583e-13	4.28205743721639e-13	363	tags=33%, list=3%, signal=33%	BUB3/RMI2/CENPE/FBXO5/MAD2L1/SPDL1/TRIP13/CCNB1/CDC6/PLK1/BUB1B/PTTG1/ZWINT/AURKB/NDC80/CENPF/BUB1/CDC20/TTK/UBE2C/DLGAP5
GO:0006402	GO:0006402	mRNA catabolic process	339	-0.524845868541964	-2.1984972858905	5.64538787533452e-15	8.62292673758238e-13	6.94764727394552e-13	2045	tags=38%, list=15%, signal=33%	PSMD10/UBB/PSMD3/DIS3L2/HBS1L/LSM5/PRPF18/THRAP3/PNPT1/SERBP1/CNOT9/NCBP1/PSMC5/EXOSC7/PSMC6/CNOT2/FASTKD2/TARDBP/RPS5/PRKCA/PSME3/EIF3E/SET/ZFP36/PSMB4/YWHAZ/PSMA1/PSME2/PSMB6/VIM/PSMA2/EIF4A3/POLR2G/PCBP4/DCP1A/RPL34/MLH1/RPL5/RPL19/RPL31/PSMD14/PSMD11/RPL12/RPL35A/RPL26/RPL15/RPL27A/RPL41/RPL22/GSPT1/PSMA6/PSMA3/PSMB5/PSMB3/NBDY/PSMC2/LSM3/RPL38/RPS8/RPL39/RPS2/PSMB7/RPL24/PSMC1/ELAVL1/WDR61/R…
GO:1905818	GO:1905818	regulation of chromosome separation	63	-0.798812374906085	-2.6492840747198	8.34914235932388e-15	1.2398476403596e-12	9.98967559484015e-13	363	tags=32%, list=3%, signal=31%	BUB3/CENPE/FBXO5/MAD2L1/SPDL1/TRIP13/CCNB1/CDC6/PLK1/BUB1B/PTTG1/ZWINT/AURKB/NDC80/CENPF/BUB1/CDC20/TTK/UBE2C/DLGAP5
GO:0045047	GO:0045047	protein targeting to ER	112	-0.696692869714646	-2.52903674563824	8.88063047737928e-15	1.28313109546134e-12	1.03384181830543e-12	1399	tags=62%, list=10%, signal=57%	RPS10/RPL35/SRP72/SRP9/HSPA5/TRAM2/SRPRA/SSR3/CHMP4A/RPS5/RPL34/RPL5/RPL19/RPL31/RPL12/RPL35A/RPL26/RPL15/RPL27A/RPL41/RPL22/RPL38/RPS8/RPL39/RPS2/RPL24/RPL17/RPS25/RPS18/RPS24/RPL14/RPL36A/RPL37/RPL30/UBA52/RPS20/RPL11/RPL9/RPS13/RPL23/RPL37A/RPS15A/RPS27/RPS17/RPS4X/RPS12/RPL21/RPL7A/RPL32/RPL7/RPS6/RPS3A/RPS26/RPS29/RPS21/RPL4/RPL23A/RPS16/RPL27/RPS27A/RPS11/RPS3/RPS7/RPL10A/RPL6/RPL10/RPS23/S…
GO:0051321	GO:0051321	meiotic cell cycle	165	-0.628118464457223	-2.43385709722702	1.22564316206903e-14	1.72428640642659e-12	1.38928859257243e-12	703	tags=24%, list=5%, signal=23%	CDK2/RBM7/MNS1/MYH9/SMC4/KIF18A/AGO4/FANCA/MCMDC2/RAD54B/EME1/RMI1/XRCC2/PSMC3IP/BUB3/CKS2/RAD51/SGO2/FANCD2/FBXO5/BRIP1/AURKA/BRCA2/EXO1/TRIP13/NUF2/CCNE2/PLK1/BUB1B/SGO1/RAD51AP1/PTTG1/RAD54L/CDC25C/BUB1/TOP2A/CDC20/CCNB2/TTK/NEK2
GO:1902099	GO:1902099	regulation of metaphase/anaphase transition of cell cycle	56	-0.812277973163573	-2.64109263156421	1.60970878655166e-14	2.20653927510388e-12	1.77784840879065e-12	363	tags=34%, list=3%, signal=33%	BUB3/CENPE/FBXO5/MAD2L1/SPDL1/TRIP13/CCNB1/CDC6/PLK1/BUB1B/ZWINT/AURKB/NDC80/CENPF/BUB1/CDC20/TTK/UBE2C/DLGAP5
GO:0072599	GO:0072599	establishment of protein localization to endoplasmic reticulum	116	-0.687162562204879	-2.52218367657415	2.1302355784284e-14	2.84705985056955e-12	2.29392736498131e-12	1399	tags=60%, list=10%, signal=55%	RPS10/RPL35/SRP72/SRP9/HSPA5/TRAM2/SRPRA/SSR3/CHMP4A/RPS5/RPL34/RPL5/RPL19/RPL31/RPL12/RPL35A/RPL26/RPL15/RPL27A/RPL41/RPL22/RPL38/RPS8/RPL39/RPS2/RPL24/RPL17/RPS25/RPS18/RPS24/RPL14/RPL36A/RPL37/RPL30/UBA52/RPS20/RPL11/RPL9/RPS13/RPL23/RPL37A/RPS15A/RPS27/RPS17/RPS4X/RPS12/RPL21/RPL7A/RPL32/RPL7/RPS6/RPS3A/RPS26/RPS29/RPS21/RPL4/RPL23A/RPS16/RPL27/RPS27A/RPS11/RPS3/RPS7/RPL10A/RPL6/RPL10/RPS23/S…
GO:0030071	GO:0030071	regulation of mitotic metaphase/anaphase transition	55	-0.822322110414986	-2.6738554380795	2.23318376623348e-14	2.91185375958151e-12	2.34613298367841e-12	363	tags=35%, list=3%, signal=34%	BUB3/CENPE/FBXO5/MAD2L1/SPDL1/TRIP13/CCNB1/CDC6/PLK1/BUB1B/ZWINT/AURKB/NDC80/CENPF/BUB1/CDC20/TTK/UBE2C/DLGAP5
GO:1902749	GO:1902749	regulation of cell cycle G2/M phase transition	201	-0.599189581685772	-2.36916708384299	2.4717986010463e-14	3.14624650504608e-12	2.53498743746403e-12	2447	tags=41%, list=17%, signal=34%	HSP90AA1/NEDD1/HUS1/RCC2/RAD21/BRD4/BRCC3/NBN/PSMA7/DONSON/DBF4B/PSMD10/PSMD3/CEP41/AVEN/CKAP5/PSMC5/PSMC6/PSME3/RAD51B/PSMB4/CDC25A/PSMA1/PSME2/RAD51C/PSMB6/PSMA2/YWHAE/PAFAH1B1/CEP135/TP53/TOPBP1/PSMD14/PSMD11/DYNLL1/BLM/PSMA6/PSMA3/PSMB5/CDC25B/PSMB3/PSMC2/PSMB7/PSMC1/CEP43/CNTRL/RBX1/HAUS8/PSMB1/PSMB9/PSMA5/CDK2/PSMB2/PSMA4/MAPRE1/NPM1/ATAD5/ACTR1A/FHL1/TUBB/CHEK1/BRCA1/TUBA1A/CDC7/FBXO5/AURK…
GO:0007091	GO:0007091	metaphase/anaphase transition of mitotic cell cycle	57	-0.812335931398271	-2.65557037179792	3.27144570561131e-14	4.06724389353443e-12	3.27705161012521e-12	363	tags=33%, list=3%, signal=33%	BUB3/CENPE/FBXO5/MAD2L1/SPDL1/TRIP13/CCNB1/CDC6/PLK1/BUB1B/ZWINT/AURKB/NDC80/CENPF/BUB1/CDC20/TTK/UBE2C/DLGAP5
GO:0044784	GO:0044784	metaphase/anaphase transition of cell cycle	58	-0.802525775893521	-2.63311806084352	3.42382362416362e-14	4.1599457033588e-12	3.35174312681281e-12	363	tags=33%, list=3%, signal=32%	BUB3/CENPE/FBXO5/MAD2L1/SPDL1/TRIP13/CCNB1/CDC6/PLK1/BUB1B/ZWINT/AURKB/NDC80/CENPF/BUB1/CDC20/TTK/UBE2C/DLGAP5
GO:0022613	GO:0022613	ribonucleoprotein complex biogenesis	425	-0.483450450933989	-2.05121381864415	7.03273249091015e-14	8.35488619920126e-12	6.73168218779049e-12	3654	tags=47%, list=26%, signal=36%	FTSJ3/GCFC2/ERCC2/PRKDC/BYSL/SFSWAP/PTGES3/UTP6/EXOSC6/NPM3/DDX52/RPP40/SRSF6/NOL6/DENR/RPL3/EIF3C/SNUPN/SNRPC/GTPBP10/MTREX/TFB1M/CDC73/NLE1/NOP14/XRN2/POLR2D/RSL24D1/NMD3/WDR18/UTP15/UTP4/RPS28/MRPL36/DDX31/LUC7L2/EIF4B/IMP4/NGDN/RSL1D1/METTL17/SRSF9/NAT10/LSM6/EIF2S2/MRTO4/HEATR1/SRPK1/RPL3L/DDX18/RRP36/RPL7L1/ISY1/ZNHIT3/EIF2S3B/HSP90AA1/RPS10/NOL9/METTL15/RPL35/METTL5/GAR1/RAMAC/WBP11/XPO1/U…
GO:1901991	GO:1901991	negative regulation of mitotic cell cycle phase transition	205	-0.591665274207834	-2.33467805334521	7.19833101013004e-14	8.36571251742505e-12	6.74040514724305e-12	2244	tags=40%, list=16%, signal=34%	NBN/SLFN11/PSMA7/TRIAP1/CNOT6/DONSON/PSMD10/PSMD3/CHEK2/MDM4/CNOT9/AVEN/CDKN2B/PSMC5/CTDSPL/PSMC6/CNOT2/PSME3/PSMB4/PSMA1/PSME2/CDK6/PSMB6/PSMA2/PCBP4/TP53/TOPBP1/PSMD14/PSMD11/PRMT1/RPL26/BLM/PSMA6/PSMA3/PSMB5/PSMB3/PSMC2/ZNF207/PSMB7/PSMC1/TFDP1/KNTC1/RBX1/PSMB1/PCNA/PSMB9/PSMA5/CDK2/CASP2/PSMB2/ANAPC15/PSMA4/BUB3/FHL1/CDKN2C/CHEK1/BRCA1/RBL1/FBXO5/EZH2/E2F7/MAD2L1/AURKA/SPDL1/TRIP13/CCNB1/CDC6…
GO:0007052	GO:0007052	mitotic spindle organization	107	-0.693613441903921	-2.52369033003113	7.70897732339386e-14	8.76855165337523e-12	7.06497988965905e-12	1158	tags=30%, list=8%, signal=28%	EML1/DRG1/FLNA/INTS13/BCCIP/GPSM2/ZNF207/MZT1/RMDN1/RAN/STIL/STMN1/BORA/CENPE/PSRC1/KIF23/RACGAP1/AURKA/TPX2/NUF2/KIF11/CCNB1/PLK1/PRC1/AURKB/NDC80/CDC20/TTK/NEK2/KIF4A/SPC25/DLGAP5
GO:0031145	GO:0031145	anaphase-promoting complex-dependent catabolic process	78	-0.743163506511858	-2.56127188373558	2.1480483766467e-13	2.36569868871599e-11	1.90608601300054e-11	2045	tags=56%, list=15%, signal=48%	PSMD10/UBB/PSMD3/PSMC5/PSMC6/PSME3/ANAPC1/PSMB4/PSMA1/PSME2/PSMB6/PSMA2/PSMD14/PSMD11/CDC23/PSMA6/PSMA3/PSMB5/PSMB3/PSMC2/PSMB7/PSMC1/UBA52/PSMB1/PSMB9/PSMA5/CDK2/PSMB2/ANAPC15/RPS27A/PSMA4/UBE2S/BUB3/FBXO5/MAD2L1/AURKA/CCNB1/PLK1/BUB1B/PTTG1/AURKB/CDC20/CDK1/UBE2C
GO:0010389	GO:0010389	regulation of G2/M transition of mitotic cell cycle	185	-0.604939537660645	-2.36348050032256	2.16833587256048e-13	2.36569868871599e-11	1.90608601300054e-11	2447	tags=42%, list=17%, signal=35%	HSP90AA1/NEDD1/HUS1/RCC2/RAD21/BRD4/NBN/PSMA7/DONSON/DBF4B/PSMD10/PSMD3/CEP41/AVEN/CKAP5/PSMC5/PSMC6/PSME3/RAD51B/PSMB4/CDC25A/PSMA1/PSME2/RAD51C/PSMB6/PSMA2/YWHAE/PAFAH1B1/CEP135/TOPBP1/PSMD14/PSMD11/DYNLL1/BLM/PSMA6/PSMA3/PSMB5/CDC25B/PSMB3/PSMC2/PSMB7/PSMC1/CEP43/CNTRL/RBX1/HAUS8/PSMB1/PSMB9/PSMA5/CDK2/PSMB2/PSMA4/MAPRE1/ACTR1A/FHL1/TUBB/CHEK1/BRCA1/TUBA1A/CDC7/FBXO5/AURKA/TPX2/CCNB1/CDC6/PLK1…
GO:0033044	GO:0033044	regulation of chromosome organization	243	-0.556807408491653	-2.24268470499747	2.68583037953113e-13	2.8273743147563e-11	2.27806637446252e-11	1057	tags=19%, list=8%, signal=18%	ZNF207/GNL3/TET1/WDR61/KNTC1/UBE2N/GTF2H2/CCT3/DKC1/HNRNPA2B1/DNMT1/ANAPC15/MYB/CCT5/PARP1/SSBP1/CCT2/HNRNPD/PHF19/HNRNPA1/BUB3/RMI2/MCM2/CENPE/BRCA1/FEN1/FBXO5/MAD2L1/SPDL1/CDCA5/TRIP13/CCNB1/CDC6/PLK1/BUB1B/PTTG1/ZWINT/AURKB/NDC80/CENPF/BUB1/TOP2A/CDC20/TTK/UBE2C/NEK2/DLGAP5
GO:0071103	GO:0071103	DNA conformation change	268	-0.552363075130717	-2.25365276483986	2.69727067064294e-13	2.8273743147563e-11	2.27806637446252e-11	1267	tags=34%, list=9%, signal=31%	NBN/CENPL/RBBP7/OIP5/CENPS/RAD23B/UBB/GTF2H5/ERCC8/MCM8/H3-3B/SMC5/SUV39H1/SMC2/IPO4/RBBP4/SET/DAXX/NASP/HAT1/XRCC5/TP53/RUVBL2/TSPYL4/HMGB1/BLM/HELLS/HDAC1/BANF1/CENPX/INO80/FANCM/TET1/MCM6/UBA52/GTF2H2/CHD1L/ANXA1/DDX1/RBX1/HNRNPA2B1/CENPO/DNMT1/CENPQ/SMC4/HMGB3/CHAF1A/PARP1/MCM3/RPS27A/RFC5/SSBP1/MCMDC2/ITGB3BP/NPM1/RAD54B/MCM5/GTF2H3/CHTF18/MCM2/ZRANB3/RAD51/CENPW/DNA2/CENPA/RFC2/NCAPG2/RFC3/…
GO:0000075	GO:0000075	cell cycle checkpoint	190	-0.592938010353468	-2.32358542074013	3.16610196197099e-13	3.25499636321095e-11	2.62260915554358e-11	1424	tags=26%, list=10%, signal=24%	PCBP4/TP53/TOPBP1/TIPRL/RAD9B/PRMT1/RPL26/BLM/ZNF207/TFDP1/KNTC1/PCNA/CDK2/CASP2/TIMELESS/ANAPC15/INTS7/EME1/BUB3/ZWILCH/DDX39B/DNA2/CHEK1/BRCA1/WDR76/FANCD2/BRIP1/E2F7/MAD2L1/AURKA/SPDL1/TRIP13/CCNB1/CDC6/PLK1/BUB1B/ORC1/ZWINT/CDC45/GTSE1/AURKB/DTL/NDC80/CLSPN/CDC25C/CENPF/BUB1/CDC20/CDK1/TTK
GO:1901988	GO:1901988	negative regulation of cell cycle phase transition	217	-0.581277897068699	-2.30514418734398	3.3228538526023e-13	3.35169371622865e-11	2.70051995329664e-11	2244	tags=38%, list=16%, signal=33%	NBN/SLFN11/PSMA7/TRIAP1/CNOT6/DONSON/PSMD10/PSMD3/CHEK2/MDM4/CNOT9/AVEN/CDKN2B/PSMC5/CTDSPL/PSMC6/CNOT2/PSME3/SUSD2/PSMB4/PSMA1/PSME2/CDK6/PSMB6/PSMA2/PCBP4/TP53/TOPBP1/PSMD14/PSMD11/PRMT1/RPL26/BLM/PSMA6/PSMA3/PSMB5/PSMB3/PSMC2/ZNF207/PSMB7/PSMC1/TFDP1/KNTC1/RBX1/PSMB1/PCNA/PSMB9/PSMA5/CDK2/CASP2/PSMB2/ANAPC15/PSMA4/BUB3/FHL1/CDKN2C/CHEK1/BRCA1/RBL1/FBXO5/EZH2/E2F7/MAD2L1/AURKA/SPDL1/TRIP13/CCNB…
GO:2001251	GO:2001251	negative regulation of chromosome organization	80	-0.736528158815378	-2.55035816010052	3.39335037109786e-13	3.35941686738688e-11	2.70674263519151e-11	1057	tags=30%, list=8%, signal=28%	ZNF207/TET1/KNTC1/ANAPC15/PARP1/HNRNPA1/BUB3/MCM2/FBXO5/MAD2L1/SPDL1/TRIP13/CCNB1/PLK1/BUB1B/PTTG1/ZWINT/AURKB/NDC80/CENPF/BUB1/TOP2A/CDC20/TTK
GO:0019080	GO:0019080	viral gene expression	191	-0.583194142653798	-2.2897289321413	5.1304417822372e-13	4.98678941233456e-11	4.01794598524682e-11	2149	tags=42%, list=15%, signal=36%	NUP93/RAE1/SMARCB1/EIF3D/NUP88/NUP85/TARDBP/RPS5/SEH1L/ZFP36/NDC1/NUCKS1/POLR2G/EIF3L/MID2/RPL34/RPL5/RPL19/RPL31/RPL12/RPL35A/RPL26/RPL15/RPL27A/RPL41/RPL22/NUP155/HDAC1/RPL38/RPS8/NUP35/RPL39/RPS2/RPL24/NUP37/RPL17/RPS25/RPS18/RPS24/RPL14/RPL36A/RPL37/RPL30/UBA52/RPS20/RPL11/RPL9/RPS13/RPL23/RPL37A/RPS15A/RPS27/RPS17/RPS4X/RPS12/POLR2H/RPL21/RPL7A/RPL32/RPL7/RPS6/RPS3A/RPS26/RPS29/RPS21/RPL4/RP…
GO:0019083	GO:0019083	viral transcription	173	-0.602950202289566	-2.33878826634444	6.19146577494927e-13	5.91063857729979e-11	4.76230788554369e-11	2149	tags=45%, list=15%, signal=39%	NUP93/RAE1/SMARCB1/NUP88/NUP85/TARDBP/RPS5/SEH1L/ZFP36/NDC1/NUCKS1/POLR2G/MID2/RPL34/RPL5/RPL19/RPL31/RPL12/RPL35A/RPL26/RPL15/RPL27A/RPL41/RPL22/NUP155/HDAC1/RPL38/RPS8/NUP35/RPL39/RPS2/RPL24/NUP37/RPL17/RPS25/RPS18/RPS24/RPL14/RPL36A/RPL37/RPL30/UBA52/RPS20/RPL11/RPL9/RPS13/RPL23/RPL37A/RPS15A/RPS27/RPS17/RPS4X/RPS12/POLR2H/RPL21/RPL7A/RPL32/RPL7/RPS6/RPS3A/RPS26/RPS29/RPS21/RPL4/RPL23A/RPS16/R…
GO:0000725	GO:0000725	recombinational repair	121	-0.659822559734106	-2.43219135947956	8.00015468530031e-13	7.50330297326587e-11	6.04554625526294e-11	2414	tags=46%, list=17%, signal=39%	RBBP8/HUS1/RAD21/NBN/KDM1A/RHNO1/NSMCE1/SFPQ/MCM8/SMC5/SHLD2/RAD51B/RAD51C/NUCKS1/CGAS/ACTR2/MORF4L1/PSMD14/BLM/INO80/FANCM/MCM6/UBE2N/AUNIP/TIMELESS/PARP1/MCM3/LIG3/PARPBP/PPP4R2/MCMDC2/RAD54B/MCM5/RPA3/RMI1/FANCB/XRCC2/SHLD1/RMI2/AP5S1/MCM2/RAD51/CHEK1/BRCA1/FEN1/MCM7/CDC7/MCM4/GINS4/MMS22L/POLQ/BRCA2/RAD51AP1/CDC45/RAD54L/GINS2
GO:1903046	GO:1903046	meiotic cell cycle process	126	-0.654391935803654	-2.41846667828349	1.12953815475124e-12	1.04112258194829e-10	8.38851203129229e-11	643	tags=25%, list=5%, signal=24%	MYH9/SMC4/KIF18A/AGO4/FANCA/RAD54B/EME1/RMI1/PSMC3IP/CKS2/RAD51/SGO2/FANCD2/FBXO5/BRIP1/AURKA/BRCA2/TRIP13/NUF2/CCNE2/PLK1/BUB1B/SGO1/RAD51AP1/PTTG1/RAD54L/CDC25C/BUB1/TOP2A/CDC20/CCNB2/TTK
GO:0000724	GO:0000724	double-strand break repair via homologous recombination	119	-0.662135998294838	-2.43311581502284	1.56319794476099e-12	1.39528675585648e-10	1.12420765254194e-10	2414	tags=46%, list=17%, signal=39%	RBBP8/HUS1/RAD21/NBN/KDM1A/NSMCE1/SFPQ/MCM8/SMC5/SHLD2/RAD51B/RAD51C/NUCKS1/CGAS/ACTR2/MORF4L1/PSMD14/BLM/INO80/FANCM/MCM6/UBE2N/AUNIP/TIMELESS/PARP1/MCM3/LIG3/PARPBP/PPP4R2/MCMDC2/RAD54B/MCM5/RPA3/RMI1/FANCB/XRCC2/SHLD1/RMI2/AP5S1/MCM2/RAD51/CHEK1/BRCA1/FEN1/MCM7/CDC7/MCM4/GINS4/MMS22L/POLQ/BRCA2/RAD51AP1/CDC45/RAD54L/GINS2
GO:0034655	GO:0034655	nucleobase-containing compound catabolic process	484	-0.454964265775903	-1.95225904119112	1.56597840163466e-12	1.39528675585648e-10	1.12420765254194e-10	2045	tags=32%, list=15%, signal=29%	PSMD10/UBB/PSMD3/DIS3L2/HBS1L/LSM5/PRPF18/THRAP3/PNPT1/SERBP1/CNOT9/NCBP1/DCTPP1/PSMC5/EXOSC7/PSMC6/CNOT2/FASTKD2/TARDBP/RPS5/PRKCA/PSME3/EIF3E/SET/FITM2/ZFP36/TDG/KPNA1/PSMB4/YWHAZ/PSMA1/PSME2/PSMB6/KPNB1/VIM/PSMA2/EIF4A3/POLR2G/PCBP4/DCP1A/RPL34/MLH1/RPL5/NUDT5/RPL19/RPL31/PSMD14/SARM1/PSMD11/RPL12/HMGB1/RPL35A/NUDT15/RPL26/RPL15/RPL27A/RPL41/RPL22/GSPT1/PSMA6/PSMA3/PSMB5/PSMB3/NBDY/PSMC2/DERA/…
GO:0000956	GO:0000956	nuclear-transcribed mRNA catabolic process	202	-0.576941993963046	-2.28162015963224	1.78401901182278e-12	1.56350256347616e-10	1.25974215640704e-10	1981	tags=43%, list=14%, signal=37%	DIS3L2/HBS1L/LSM5/PRPF18/THRAP3/CNOT9/NCBP1/EXOSC7/CNOT2/RPS5/EIF3E/ZFP36/EIF4A3/POLR2G/DCP1A/RPL34/MLH1/RPL5/RPL19/RPL31/RPL12/RPL35A/RPL26/RPL15/RPL27A/RPL41/RPL22/GSPT1/NBDY/LSM3/RPL38/RPS8/RPL39/RPS2/RPL24/WDR61/RPL17/RPS25/RPS18/RBM8A/RPS24/MAGOHB/RPL14/RPL36A/LSM2/RPL37/RPL30/UBA52/RPS20/RPL11/RPL9/RPS13/RPL23/RPL37A/RPS15A/RPS27/RPS17/RPS4X/RPS12/RPL21/RPL7A/RPL32/RPL7/RPS6/RPS3A/RPS26/RPS…
GO:0044786	GO:0044786	cell cycle DNA replication	58	-0.775365714376905	-2.54400485020128	1.8364291669232e-12	1.58347585909216e-10	1.27583500017822e-10	1030	tags=47%, list=7%, signal=43%	INO80/MCM6/PCNA/POLD3/MCM3/RFC5/MCMDC2/MCM5/RPA3/MCM2/GMNN/RAD51/DNA2/RFC2/FEN1/RFC3/RFC4/PRIM1/MCM7/CDC7/FBXO5/GINS1/MCM4/E2F7/BRCA2/POLE2/CDC45
GO:0140013	GO:0140013	meiotic nuclear division	113	-0.666432314830645	-2.42753716956561	2.30892667879686e-12	1.95928921029333e-10	1.57863458139294e-10	619	tags=27%, list=4%, signal=26%	SMC4/KIF18A/AGO4/FANCA/RAD54B/EME1/RMI1/PSMC3IP/CKS2/RAD51/SGO2/FANCD2/FBXO5/BRIP1/AURKA/BRCA2/TRIP13/NUF2/CCNE2/PLK1/BUB1B/SGO1/RAD51AP1/PTTG1/RAD54L/BUB1/TOP2A/CDC20/CCNB2/TTK
GO:0032392	GO:0032392	DNA geometric change	106	-0.674051083519092	-2.44579166580687	3.24438741440613e-12	2.71007736209612e-10	2.18355810851149e-10	1479	tags=39%, list=11%, signal=35%	XRCC5/TP53/RUVBL2/HMGB1/BLM/INO80/FANCM/MCM6/UBA52/GTF2H2/CHD1L/ANXA1/DDX1/RBX1/HNRNPA2B1/HMGB3/PARP1/MCM3/RPS27A/RFC5/SSBP1/MCMDC2/RAD54B/MCM5/GTF2H3/CHTF18/MCM2/ZRANB3/RAD51/DNA2/RFC2/RFC3/RFC4/MCM7/HMGB2/MCM4/BRIP1/POLQ/ERCC6L/RAD54L/TOP2A
GO:0045930	GO:0045930	negative regulation of mitotic cell cycle	265	-0.529560061069203	-2.16732708994328	4.8474313151532e-12	3.98682581704754e-10	3.21225731847885e-10	2244	tags=35%, list=16%, signal=30%	NBN/SLFN11/PSMA7/TRIAP1/CNOT6/DONSON/PSMD10/PSMD3/MSH2/CHEK2/ATF2/PNPT1/MDM4/CNOT9/AVEN/CDKN2B/SLC9A3R1/PSMC5/CTDSPL/PSMC6/CNOT2/PSME3/PSMB4/PSMA1/PSME2/CDK6/PSMB6/PSMA2/TOM1L1/BTG1/PCBP4/TP53/TOPBP1/PSMD14/RAD9B/PSMD11/PRMT1/RPL26/BLM/PSMA6/PSMA3/PSMB5/PSMB3/PSMC2/ZNF207/PSMB7/PSMC1/TFDP1/KNTC1/RBX1/PSMB1/PCNA/PSMB9/PSMA5/CDK2/CASP2/PSMB2/ANAPC15/PSMA4/EME1/BUB3/FHL1/ZWILCH/CDKN2C/CHEK1/BRCA1/RB…
GO:0033047	GO:0033047	regulation of mitotic sister chromatid segregation	40	-0.83926684979484	-2.56775911990365	5.06257490794882e-12	4.10068567543854e-10	3.30399625571397e-10	363	tags=48%, list=3%, signal=46%	ZNF207/KNTC1/ANAPC15/BUB3/FBXO5/MAD2L1/SPDL1/TRIP13/CCNB1/PLK1/BUB1B/PTTG1/ZWINT/AURKB/NDC80/CENPF/BUB1/CDC20/TTK
GO:0033046	GO:0033046	negative regulation of sister chromatid segregation	37	-0.852592210410858	-2.5785555088932	8.77445293278204e-12	6.79829353313809e-10	5.47750746009826e-10	363	tags=51%, list=3%, signal=50%	ZNF207/KNTC1/ANAPC15/BUB3/FBXO5/MAD2L1/SPDL1/TRIP13/CCNB1/PLK1/BUB1B/PTTG1/ZWINT/AURKB/NDC80/CENPF/BUB1/CDC20/TTK
GO:0033048	GO:0033048	negative regulation of mitotic sister chromatid segregation	37	-0.852592210410858	-2.5785555088932	8.77445293278204e-12	6.79829353313809e-10	5.47750746009826e-10	363	tags=51%, list=3%, signal=50%	ZNF207/KNTC1/ANAPC15/BUB3/FBXO5/MAD2L1/SPDL1/TRIP13/CCNB1/PLK1/BUB1B/PTTG1/ZWINT/AURKB/NDC80/CENPF/BUB1/CDC20/TTK
GO:2000816	GO:2000816	negative regulation of mitotic sister chromatid separation	37	-0.852592210410858	-2.5785555088932	8.77445293278204e-12	6.79829353313809e-10	5.47750746009826e-10	363	tags=51%, list=3%, signal=50%	ZNF207/KNTC1/ANAPC15/BUB3/FBXO5/MAD2L1/SPDL1/TRIP13/CCNB1/PLK1/BUB1B/PTTG1/ZWINT/AURKB/NDC80/CENPF/BUB1/CDC20/TTK
GO:0051985	GO:0051985	negative regulation of chromosome segregation	38	-0.839262431409287	-2.55673628878683	1.10099551813823e-11	8.29003104220697e-10	6.67942722049165e-10	363	tags=50%, list=3%, signal=49%	ZNF207/KNTC1/ANAPC15/BUB3/FBXO5/MAD2L1/SPDL1/TRIP13/CCNB1/PLK1/BUB1B/PTTG1/ZWINT/AURKB/NDC80/CENPF/BUB1/CDC20/TTK
GO:1905819	GO:1905819	negative regulation of chromosome separation	38	-0.839262431409287	-2.55673628878683	1.10099551813823e-11	8.29003104220697e-10	6.67942722049165e-10	363	tags=50%, list=3%, signal=49%	ZNF207/KNTC1/ANAPC15/BUB3/FBXO5/MAD2L1/SPDL1/TRIP13/CCNB1/PLK1/BUB1B/PTTG1/ZWINT/AURKB/NDC80/CENPF/BUB1/CDC20/TTK
GO:0045841	GO:0045841	negative regulation of mitotic metaphase/anaphase transition	36	-0.845420530151021	-2.5359664917339	1.39731651114187e-11	1.03750750952284e-09	8.35938474209436e-10	363	tags=50%, list=3%, signal=49%	ZNF207/KNTC1/ANAPC15/BUB3/FBXO5/MAD2L1/SPDL1/TRIP13/CCNB1/PLK1/BUB1B/ZWINT/AURKB/NDC80/CENPF/BUB1/CDC20/TTK
GO:0051784	GO:0051784	negative regulation of nuclear division	46	-0.80433803854948	-2.49726864914067	1.78445160898826e-11	1.30680524680154e-09	1.05291650814419e-09	363	tags=41%, list=3%, signal=40%	ZNF207/KNTC1/ANAPC15/BUB3/CHEK1/FBXO5/MAD2L1/SPDL1/TRIP13/CCNB1/PLK1/BUB1B/ZWINT/AURKB/NDC80/CENPF/BUB1/CDC20/TTK
GO:0044843	GO:0044843	cell cycle G1/S phase transition	231	-0.537721137711187	-2.14662511387375	3.79135620446695e-11	2.73899868501086e-09	2.20686053893012e-09	1882	tags=30%, list=13%, signal=26%	MDM4/CNOT9/CDKN2B/CTDSPL/CNOT2/TAF10/PSME3/SUSD2/CDC25A/PSME2/CDK6/NASP/RPTOR/EIF4EBP1/PCBP4/TP53/KHDRBS1/POLA2/PRMT1/RPL26/GSPT1/INO80/TFDP1/MCM6/EIF4E/PLRG1/ANXA1/PCNA/STXBP4/CDK2/CASP2/RPS6/MCM3/MCM5/RPA3/ORC6/FHL1/MCM2/CDK15/GMNN/CDKN2C/BCAT1/RBL1/SKP2/PRIM1/MCM7/CDC7/FBXO5/MCM4/EZH2/TYMS/E2F7/CDKN3/AURKA/DHFR/CCNA2/POLE2/CCNB1/CDC6/CCNE2/ORC1/CDC45/GTSE1/CDC25C/MCM10/CDK1/KIF14/IQGAP3/RRM2
GO:0000082	GO:0000082	G1/S transition of mitotic cell cycle	215	-0.546171150650152	-2.15632184362016	4.79586888316318e-11	3.41849533991871e-09	2.75434322384614e-09	1882	tags=31%, list=13%, signal=27%	MDM4/CNOT9/CDKN2B/CTDSPL/CNOT2/TAF10/PSME3/CDC25A/PSME2/CDK6/NASP/RPTOR/EIF4EBP1/PCBP4/TP53/KHDRBS1/POLA2/PRMT1/RPL26/GSPT1/INO80/TFDP1/MCM6/EIF4E/PLRG1/ANXA1/PCNA/CDK2/CASP2/RPS6/MCM3/MCM5/RPA3/ORC6/FHL1/MCM2/CDK15/GMNN/CDKN2C/BCAT1/RBL1/SKP2/PRIM1/MCM7/CDC7/FBXO5/MCM4/EZH2/TYMS/E2F7/CDKN3/AURKA/DHFR/POLE2/CCNB1/CDC6/CCNE2/ORC1/CDC45/GTSE1/CDC25C/MCM10/CDK1/KIF14/IQGAP3/RRM2
GO:0007094	GO:0007094	mitotic spindle assembly checkpoint	34	-0.847859481953949	-2.51952625982998	6.35481985144003e-11	4.35549575971774e-09	3.5093013268681e-09	363	tags=50%, list=3%, signal=49%	ZNF207/KNTC1/ANAPC15/BUB3/MAD2L1/SPDL1/TRIP13/CCNB1/PLK1/BUB1B/ZWINT/AURKB/NDC80/CENPF/BUB1/CDC20/TTK
GO:0071173	GO:0071173	spindle assembly checkpoint	34	-0.847859481953949	-2.51952625982998	6.35481985144003e-11	4.35549575971774e-09	3.5093013268681e-09	363	tags=50%, list=3%, signal=49%	ZNF207/KNTC1/ANAPC15/BUB3/MAD2L1/SPDL1/TRIP13/CCNB1/PLK1/BUB1B/ZWINT/AURKB/NDC80/CENPF/BUB1/CDC20/TTK
GO:0071174	GO:0071174	mitotic spindle checkpoint	34	-0.847859481953949	-2.51952625982998	6.35481985144003e-11	4.35549575971774e-09	3.5093013268681e-09	363	tags=50%, list=3%, signal=49%	ZNF207/KNTC1/ANAPC15/BUB3/MAD2L1/SPDL1/TRIP13/CCNB1/PLK1/BUB1B/ZWINT/AURKB/NDC80/CENPF/BUB1/CDC20/TTK
GO:0045839	GO:0045839	negative regulation of mitotic nuclear division	43	-0.814417798929521	-2.50737189495196	6.57483521618244e-11	4.44924924882422e-09	3.58484020048215e-09	363	tags=44%, list=3%, signal=43%	ZNF207/KNTC1/ANAPC15/BUB3/CHEK1/FBXO5/MAD2L1/SPDL1/TRIP13/CCNB1/PLK1/BUB1B/ZWINT/AURKB/NDC80/CENPF/BUB1/CDC20/TTK
GO:0061982	GO:0061982	meiosis I cell cycle process	81	-0.704564772894903	-2.44748870263097	7.30079678710366e-11	4.87875745298202e-09	3.9309026911616e-09	587	tags=40%, list=4%, signal=38%	RAD51B/NDC1/CDC25A/RAD51C/P3H4/MLH1/CDC25B/CENPX/FANCM/AGO4/RAD54B/EME1/RMI1/PSMC3IP/CKS2/RAD51/SGO2/FANCD2/FBXO5/BRIP1/AURKA/BRCA2/TRIP13/CCNE2/PLK1/SGO1/RAD51AP1/PTTG1/RAD54L/CDC25C/TOP2A/CCNB2
GO:0031577	GO:0031577	spindle checkpoint	35	-0.833209500333673	-2.47085068240009	8.47815168281625e-11	5.59558011065873e-09	4.50845960832802e-09	363	tags=49%, list=3%, signal=47%	ZNF207/KNTC1/ANAPC15/BUB3/MAD2L1/SPDL1/TRIP13/CCNB1/PLK1/BUB1B/ZWINT/AURKB/NDC80/CENPF/BUB1/CDC20/TTK
GO:0045787	GO:0045787	positive regulation of cell cycle	299	-0.496520556258817	-2.04790030729693	1.02511888022446e-10	6.6832750410731e-09	5.38483499085812e-09	2233	tags=29%, list=16%, signal=25%	PGGT1B/HOXA13/HNRNPU/RHNO1/TRIAP1/CNOT6/DBF4B/PSMD10/ECT2/CHEK2/SFPQ/SMC5/MDM4/CNOT9/CNOT2/RHOA/NPM2/PRKCA/RAD51B/CDC25A/RAD51C/RPTOR/EIF4EBP1/PCBP4/PKP4/TP53/CITED2/CDC23/PRMT1/RPL26/RANBP1/CDC25B/GPSM2/INO80/CIT/TFDP1/HES1/EIF4E/PLRG1/RPL23/ANXA1/RPS15A/PCNA/STXBP4/CDK2/CASP2/HSP90AB1/KLHL18/CDC42/NPM1/ATAD5/CKS2/DDX39B/CKS1B/CHEK1/BRCA1/FEN1/CDC7/PSRC1/FBXO5/KIF23/KIF20B/ASNS/EZH2/RACGAP1/E2F7…
GO:0007093	GO:0007093	mitotic cell cycle checkpoint	142	-0.605127663757486	-2.26896389381065	1.26054095802551e-10	8.11909874892094e-09	6.54170399523195e-09	1424	tags=29%, list=10%, signal=26%	PCBP4/TP53/TOPBP1/RAD9B/PRMT1/RPL26/BLM/ZNF207/TFDP1/KNTC1/PCNA/CDK2/CASP2/ANAPC15/EME1/BUB3/ZWILCH/CHEK1/BRCA1/FANCD2/E2F7/MAD2L1/AURKA/SPDL1/TRIP13/CCNB1/CDC6/PLK1/BUB1B/ORC1/ZWINT/GTSE1/AURKB/NDC80/CLSPN/CDC25C/CENPF/BUB1/CDC20/CDK1/TTK
GO:0033260	GO:0033260	nuclear DNA replication	54	-0.769331604068016	-2.49102404262062	1.31647389300173e-10	8.37841599046103e-09	6.75064056411415e-09	1030	tags=46%, list=7%, signal=43%	INO80/MCM6/PCNA/POLD3/MCM3/RFC5/MCMDC2/MCM5/RPA3/MCM2/GMNN/RAD51/DNA2/RFC2/FEN1/RFC3/RFC4/PRIM1/MCM7/CDC7/GINS1/MCM4/BRCA2/POLE2/CDC45
GO:0032508	GO:0032508	DNA duplex unwinding	99	-0.664302716459568	-2.38611425339873	1.44537304517224e-10	9.09054623469505e-09	7.32441671931245e-09	1030	tags=33%, list=7%, signal=31%	INO80/FANCM/MCM6/UBA52/GTF2H2/CHD1L/ANXA1/DDX1/RBX1/PARP1/MCM3/RPS27A/RFC5/SSBP1/MCMDC2/RAD54B/MCM5/GTF2H3/CHTF18/MCM2/ZRANB3/RAD51/DNA2/RFC2/RFC3/RFC4/MCM7/MCM4/BRIP1/POLQ/ERCC6L/RAD54L/TOP2A
GO:0051303	GO:0051303	establishment of chromosome localization	67	-0.726634674390739	-2.42961681484612	1.74323807121694e-10	1.08364543357276e-08	8.73112630039131e-09	1729	tags=36%, list=12%, signal=32%	CHMP4A/SEH1L/BOD1/KPNB1/ACTR2/MLH1/CDC23/RMDN1/CENPQ/KIF18A/CENPE/PSRC1/SPDL1/CDCA5/NUF2/CCNB1/SPAG5/CDCA8/AURKB/NDC80/CENPF/KIF14/KIF2C/DLGAP5
GO:0007127	GO:0007127	meiosis I	77	-0.701992184410881	-2.41868276887336	1.85679097421952e-10	1.14096604002041e-08	9.19296874350426e-09	587	tags=39%, list=4%, signal=38%	RAD51B/NDC1/RAD51C/P3H4/MLH1/CDC25B/CENPX/FANCM/AGO4/RAD54B/EME1/RMI1/PSMC3IP/CKS2/RAD51/SGO2/FANCD2/FBXO5/BRIP1/AURKA/BRCA2/TRIP13/CCNE2/PLK1/SGO1/RAD51AP1/PTTG1/RAD54L/TOP2A/CCNB2
GO:0050000	GO:0050000	chromosome localization	69	-0.719929740388267	-2.42950147381647	1.88099495339929e-10	1.14270443419007e-08	9.20697529821757e-09	1729	tags=36%, list=12%, signal=32%	CHMP4A/SEH1L/BOD1/KPNB1/ACTR2/MLH1/CDC23/RMDN1/CENPQ/KIF18A/LMNA/CENPE/PSRC1/SPDL1/CDCA5/NUF2/CCNB1/SPAG5/CDCA8/AURKB/NDC80/CENPF/KIF14/KIF2C/DLGAP5
GO:1902100	GO:1902100	negative regulation of metaphase/anaphase transition of cell cycle	37	-0.831445488485009	-2.51459996760265	1.99800548860224e-10	1.20015026315366e-08	9.6698266816799e-09	363	tags=49%, list=3%, signal=48%	ZNF207/KNTC1/ANAPC15/BUB3/FBXO5/MAD2L1/SPDL1/TRIP13/CCNB1/PLK1/BUB1B/ZWINT/AURKB/NDC80/CENPF/BUB1/CDC20/TTK
GO:0090068	GO:0090068	positive regulation of cell cycle process	230	-0.520208773418556	-2.07374193957457	4.72365039587827e-10	2.80584833515169e-08	2.26072250525542e-08	2224	tags=30%, list=16%, signal=26%	HOXA13/HNRNPU/RHNO1/TRIAP1/CNOT6/DBF4B/ECT2/CHEK2/SFPQ/SMC5/MDM4/CNOT9/CNOT2/RHOA/NPM2/RAD51B/CDC25A/RAD51C/RPTOR/PCBP4/PKP4/TP53/CDC23/PRMT1/RPL26/RANBP1/CDC25B/GPSM2/INO80/CIT/TFDP1/PLRG1/RPL23/ANXA1/PCNA/STXBP4/CDK2/CASP2/KLHL18/CDC42/NPM1/ATAD5/BRCA1/FEN1/CDC7/FBXO5/KIF23/KIF20B/EZH2/RACGAP1/E2F7/EGF/MAD2L1/AURKA/CDCA5/CCNB1/CDC6/RAD51AP1/PLK4/SPAG5/GTSE1/AURKB/DTL/NUSAP1/NDC80/CDC25C/CDK1/KI…
GO:0042254	GO:0042254	ribosome biogenesis	296	-0.483884553360797	-1.99010963614474	6.99477896345024e-10	4.10924047676978e-08	3.31088901312185e-08	3331	tags=45%, list=24%, signal=35%	RPL3/GTPBP10/MTREX/TFB1M/NLE1/NOP14/XRN2/RSL24D1/NMD3/WDR18/UTP15/UTP4/RPS28/MRPL36/DDX31/IMP4/NGDN/RSL1D1/METTL17/NAT10/LSM6/MRTO4/HEATR1/RPL3L/DDX18/RRP36/RPL7L1/ZNHIT3/RPS10/NOL9/METTL15/RPL35/METTL5/GAR1/WBP11/XPO1/UTP20/HEATR3/WDR12/PDCD11/NSA2/GTF2H5/WDR75/MRPL20/NUP88/TSC1/SUV39H1/DDX21/NIFK/EXOSC7/NOL11/NIP7/PIH1D2/FASTKD2/GNL2/RPS5/RIOX2/PWP1/RIOK2/WDR3/FCF1/NSUN3/NOP56/NOP10/EIF4A3/XRCC…
GO:0070972	GO:0070972	protein localization to endoplasmic reticulum	141	-0.590462037950332	-2.21494717322679	8.11729932434643e-10	4.71685675956044e-08	3.80045638846975e-08	1399	tags=43%, list=10%, signal=39%	RPL34/RPL5/RPL19/RPL31/RPL12/RPL35A/RPL26/RPL15/RPL27A/RPL41/RPL22/RPL38/RPS8/RPL39/RPS2/RPL24/RPL17/RPS25/RPS18/RPS24/RPL14/RPL36A/RPL37/RPL30/UBA52/RPS20/RPL11/RPL9/RPS13/RPL23/RPL37A/RPS15A/RPS27/RPS17/RPS4X/RPS12/RPL21/RPL7A/RPL32/RPL7/RPS6/RPS3A/RPS26/RPS29/RPS21/RPL4/RPL23A/RPS16/RPL27/RPS27A/RPS11/RPS3/RPS7/RPL10A/RPL6/RPL10/RPS23/SEC61G/RPLP0/RPSA
GO:0034502	GO:0034502	protein localization to chromosome	86	-0.664874443939349	-2.31598107308069	9.17017039161769e-10	5.27136891543959e-08	4.24723681295977e-08	1664	tags=43%, list=12%, signal=38%	RCC2/RAD21/PPHLN1/LEMD2/TCP1/MSH2/MCM8/SMC5/XRCC4/BOD1/CCT6A/XRCC5/RUVBL2/CCT8/GNL3L/HASPIN/GNL3/CCT3/DKC1/CENPQ/CCT5/CCT2/BUB3/ZWILCH/CENPA/EZH2/BRCA2/SPDL1/CDCA5/PLK1/BUB1B/AURKB/NDC80/CDK1/TTK/ESCO2/KNL1
GO:0051225	GO:0051225	spindle assembly	101	-0.639490353602502	-2.31086512330739	1.19896542076591e-09	6.81879695682398e-08	5.49402743759696e-08	1398	tags=26%, list=10%, signal=23%	DRG1/MLH1/FLNA/BCCIP/GPSM2/ZNF207/INO80/MZT1/HAUS8/RPS3/MAPRE1/TUBB/FBXO5/KIF23/RACGAP1/AURKA/TPX2/KIF11/PLK1/PRC1/SPAG5/AURKB/CDC20/CCNB2/NEK2/KIF4A
GO:0000910	GO:0000910	cytokinesis	136	-0.590464385220993	-2.21338537503255	1.36914597966714e-09	7.70468884979003e-08	6.20780648066253e-08	1003	tags=19%, list=7%, signal=18%	CIT/CKAP2/ARL3/CALM2/MYO19/MYH9/CDC42/STMN1/CENPA/KIF23/KIF20B/RACGAP1/E2F7/AURKA/BRCA2/CDC6/PLK1/PRC1/PLK4/AURKB/NUSAP1/CEP55/KIF14/ANLN/KIF4A/KIF20A
GO:0051310	GO:0051310	metaphase plate congression	58	-0.728676854978255	-2.39081689958886	1.38802229078012e-09	7.7295491317818e-08	6.22783685731607e-08	1729	tags=38%, list=12%, signal=33%	CHMP4A/SEH1L/BOD1/KPNB1/MLH1/CDC23/RMDN1/CENPQ/KIF18A/CENPE/PSRC1/SPDL1/CDCA5/NUF2/CCNB1/SPAG5/CDCA8/AURKB/NDC80/CENPF/KIF14/KIF2C
GO:0006397	GO:0006397	mRNA processing	464	-0.430205496849212	-1.83805896141328	1.41086175771732e-09	7.77573913067712e-08	6.26505297078598e-08	3843	tags=44%, list=27%, signal=33%	LGALS3/SNRPB/RBM15/FRG1/LSM7/PSPC1/PNN/DHX9/PAN3/POLR2F/HNRNPLL/SNRNP70/DCPS/FXR1/VIRMA/MNAT1/GCFC2/ERCC2/POLDIP3/SMNDC1/GTF2H1/SFSWAP/AKAP17A/PPP1R8/SUPT6H/ACIN1/RBM24/IK/HNRNPA0/SRSF6/SNRPA1/POLR2A/SNUPN/SNRPC/CWC15/MTREX/SRSF4/POLR2K/PTCD2/CDC73/POLR2I/ZRANB2/QKI/XRN2/RBM41/POLR2D/CDK12/RBM22/ECD/CHTOP/POLR2C/RBM4B/LUC7L2/METTL14/HNRNPC/LARP7/BCAS2/TIA1/SRSF9/CCNH/LSM6/PPIE/PTBP1/ZMAT2/UPF3B/S…
GO:0000377	GO:0000377	RNA splicing, via transesterification reactions with bulged adenosine as nucleophile	325	-0.471040552010163	-1.9635626787485	1.47400825661166e-09	7.95964458570295e-08	6.41322890595949e-08	3814	tags=48%, list=27%, signal=36%	RBM15/FRG1/LSM7/PSPC1/PNN/DHX9/POLR2F/SNRNP70/DCPS/FXR1/GCFC2/SMNDC1/SFSWAP/RBM24/IK/HNRNPA0/SRSF6/SNRPA1/POLR2A/SNUPN/SNRPC/CWC15/MTREX/SRSF4/POLR2K/POLR2I/QKI/RBM41/POLR2D/RBM22/POLR2C/RBM4B/LUC7L2/METTL14/HNRNPC/LARP7/BCAS2/TIA1/SRSF9/LSM6/PPIE/PTBP1/ZMAT2/UPF3B/SRPK1/SNW1/SAP18/ISY1/CPSF3/CWC22/YBX1/ALYREF/MFAP1/LSM8/WBP11/PPWD1/SF3B3/PRPF4/KDM1A/HNRNPU/CWC27/XAB2/PRPF3/PABPN1/CDC5L/SRSF10/GE…
GO:0000398	GO:0000398	mRNA splicing, via spliceosome	325	-0.471040552010163	-1.9635626787485	1.47400825661166e-09	7.95964458570295e-08	6.41322890595949e-08	3814	tags=48%, list=27%, signal=36%	RBM15/FRG1/LSM7/PSPC1/PNN/DHX9/POLR2F/SNRNP70/DCPS/FXR1/GCFC2/SMNDC1/SFSWAP/RBM24/IK/HNRNPA0/SRSF6/SNRPA1/POLR2A/SNUPN/SNRPC/CWC15/MTREX/SRSF4/POLR2K/POLR2I/QKI/RBM41/POLR2D/RBM22/POLR2C/RBM4B/LUC7L2/METTL14/HNRNPC/LARP7/BCAS2/TIA1/SRSF9/LSM6/PPIE/PTBP1/ZMAT2/UPF3B/SRPK1/SNW1/SAP18/ISY1/CPSF3/CWC22/YBX1/ALYREF/MFAP1/LSM8/WBP11/PPWD1/SF3B3/PRPF4/KDM1A/HNRNPU/CWC27/XAB2/PRPF3/PABPN1/CDC5L/SRSF10/GE…
GO:0000375	GO:0000375	RNA splicing, via transesterification reactions	328	-0.469754622900531	-1.95755119205837	1.89933799935021e-09	1.01538609445262e-07	8.18114851930639e-08	3814	tags=48%, list=27%, signal=35%	RBM15/FRG1/LSM7/PSPC1/PNN/DHX9/POLR2F/SNRNP70/DCPS/FXR1/GCFC2/SMNDC1/SFSWAP/RBM24/IK/HNRNPA0/SRSF6/SNRPA1/POLR2A/SNUPN/SNRPC/CWC15/MTREX/SRSF4/POLR2K/POLR2I/QKI/RBM41/POLR2D/RBM22/POLR2C/RBM4B/LUC7L2/METTL14/HNRNPC/LARP7/BCAS2/TIA1/SRSF9/LSM6/PPIE/PTBP1/ZMAT2/UPF3B/SRPK1/SNW1/SAP18/ISY1/CPSF3/CWC22/YBX1/ALYREF/MFAP1/LSM8/WBP11/PPWD1/SF3B3/PRPF4/KDM1A/HNRNPU/CWC27/XAB2/PRPF3/PABPN1/CDC5L/SRSF10/GE…
GO:0071897	GO:0071897	DNA biosynthetic process	164	-0.550850398013513	-2.13160748043005	2.65403407338579e-09	1.40479862933866e-07	1.13187154020789e-07	950	tags=24%, list=7%, signal=23%	CCT6A/NOP10/XRCC5/ANKRD1/TP53/CCT8/GNL3L/TFDP1/UBA52/CCT3/DKC1/PCNA/HNRNPA2B1/HSP90AB1/POLD3/PPIA/CCT5/RPS27A/LIG3/RFC5/LIN9/CCT2/HNRNPD/HNRNPA1/RPA3/CHTF18/DDX39B/RFC2/RFC3/RFC4/TYMS/POLQ/POLE2/TK1/AURKB/DTL/CENPF/HGF/PCLAF/NEK2
GO:0071824	GO:0071824	protein-DNA complex subunit organization	208	-0.526282474336633	-2.07624109699846	3.0178657918949e-09	1.58171671798727e-07	1.27441762852776e-07	2552	tags=38%, list=18%, signal=32%	GTF2B/DR1/NAP1L3/TAF8/CDK7/NAP1L4/TAF12/TAF11/SUPT16H/CENPL/RBBP7/OIP5/GTF2E1/CENPS/RAD23B/SMARCB1/UBB/GTF2H5/POLR1E/H3-3B/PSMC5/PSMC6/IPO4/POGZ/RBBP4/SET/DAXX/RAD51C/NASP/HAT1/TP53/SMARCC1/TSPYL4/HMGB1/HELLS/ACTR6/PSMC2/SMARCE1/CENPX/INO80/MCM6/UBA52/GTF2H2/CHD1L/RPL23/RBX1/CENPO/CENPQ/CHAF1A/PARP1/MCM3/RPS27A/MCMDC2/ITGB3BP/NPM1/MCM5/RPA3/GTF2H3/MCM2/GMNN/RAD51/CENPW/CENPA/CENPE/ANP32E/MCM7/H4C…
GO:0065004	GO:0065004	protein-DNA complex assembly	176	-0.543486866515448	-2.10638128286664	5.61066581016318e-09	2.91209897292547e-07	2.34633055648316e-07	2801	tags=44%, list=20%, signal=35%	HP1BP3/CCNH/NAP1L5/H3-3A/NAA60/ASF1A/GTF2B/DR1/NAP1L3/CDK7/NAP1L4/TAF12/TAF11/CENPL/RBBP7/OIP5/CENPS/RAD23B/SMARCB1/UBB/GTF2H5/POLR1E/H3-3B/PSMC5/PSMC6/IPO4/POGZ/RBBP4/SET/DAXX/RAD51C/NASP/HAT1/TP53/TSPYL4/HMGB1/HELLS/PSMC2/CENPX/MCM6/UBA52/GTF2H2/CHD1L/RBX1/CENPO/CENPQ/CHAF1A/PARP1/MCM3/RPS27A/MCMDC2/ITGB3BP/NPM1/MCM5/RPA3/GTF2H3/MCM2/GMNN/RAD51/CENPW/CENPA/CENPE/MCM7/H4C3/CENPM/HMGB2/MCM4/CENPI…
GO:0006612	GO:0006612	protein targeting to membrane	180	-0.534170510085825	-2.07650900245691	9.33965320371303e-09	4.80094096413941e-07	3.86820454550544e-07	3038	tags=52%, list=22%, signal=41%	RPS28/RPL8/MYO1C/SRP14/ZDHHC6/PEX26/RPL36/NACA2/SRP19/TRAM1L1/MICALL1/SRP54/PEX19/RPS10/RPL35/SRP72/SRP9/TCAF2/HSPA5/TRAM2/SRPRA/SSR3/NACA/CHMP4A/RPS5/RAB8B/PEX3/RPL34/RPL5/RPL19/RPL31/NACA4P/RPL12/RPL35A/RPL26/YIF1B/RPL15/RPL27A/RPL41/RPL22/RPL38/RPS8/RPL39/RPS2/RPL24/GDI1/RPL17/RPS25/RPS18/RPS24/RPL14/RPL36A/RPL37/ATG3/RPL30/UBA52/RPS20/RPL11/RPL9/RPS13/RPL23/RPL37A/RPS15A/RPS27/RPS17/RPS4X/RPS…
GO:0006271	GO:0006271	DNA strand elongation involved in DNA replication	19	-0.895477523235027	-2.32790626013896	9.75614636250253e-09	4.96727223370843e-07	4.0022206431439e-07	748	tags=68%, list=5%, signal=65%	PCNA/POLD3/MCM3/LIG3/MCMDC2/DNA2/RFC3/RFC4/MCM7/GINS1/MCM4/GINS4/GINS2
GO:0007080	GO:0007080	mitotic metaphase plate congression	46	-0.754338433465413	-2.34203236755062	1.17687230973424e-08	5.93543336588608e-07	4.78228549298164e-07	1729	tags=39%, list=12%, signal=34%	CHMP4A/SEH1L/BOD1/KPNB1/CDC23/RMDN1/KIF18A/CENPE/PSRC1/SPDL1/CDCA5/NUF2/CCNB1/CDCA8/AURKB/NDC80/KIF14/KIF2C
GO:0003013	GO:0003013	circulatory system process	352	0.414357647513558	1.80718881947161	1.30272550050772e-08	6.50875750066752e-07	5.24422306746441e-07	1839	tags=25%, list=13%, signal=22%	AGT/KCNH6/CD36/SLC1A2/FGF13/LRP2/PDE4B/SUCNR1/STC1/LEPR/RARRES2/KCNJ2/RGS4/RGS2/MYL3/SOD2/REN/ANGPT1/ATP2A2/SERPING1/TMEM38B/ABCC3/TNNT2/EPAS1/INSR/ACTC1/NISCH/GSN/AGTRAP/FYN/TNNI3K/ATP6AP2/CCN2/SCPEP1/CACNA1C/HSPB7/STAT1/TGFB1/SLC9A1/KCNJ14/NOS1AP/ADM/SLC2A13/SGK1/NPR2/GPER1/SLC5A3/P2RX4/SLC2A1/CHRM3/KCND2/SLC16A12/MEF2A/GAS6/PRCP/THRA/GPX1/MME/KCNMB2/BBS2/ECE1/SLC1A1/SLC27A1/ID2/MECP2/SLC38A2/D…
GO:0008380	GO:0008380	RNA splicing	411	-0.429834340526194	-1.82062423085681	1.59580306514357e-08	7.89922517246069e-07	6.36454789723928e-07	3843	tags=45%, list=27%, signal=34%	LGALS3/SNRPB/RBM15/FRG1/LSM7/PSPC1/PNN/DHX9/POLR2F/HNRNPLL/SNRNP70/DCPS/FXR1/VIRMA/GCFC2/SMNDC1/SFSWAP/AKAP17A/PPP1R8/SUPT6H/ACIN1/RBM24/IK/HNRNPA0/SRSF6/SNRPA1/POLR2A/SNUPN/SNRPC/CWC15/MTREX/SRSF4/POLR2K/POLR2I/ZRANB2/TMBIM6/QKI/RBM41/POLR2D/CDK12/RBM22/ECD/POLR2C/RBM4B/LUC7L2/METTL14/HNRNPC/LARP7/RP9/BCAS2/TIA1/SRSF9/LSM6/PPIE/PTBP1/ZMAT2/UPF3B/SRPK1/SNW1/SAP18/ISY1/CPSF3/CWC22/YBX1/CLK4/IVNS1A…
GO:0006270	GO:0006270	DNA replication initiation	38	-0.775808554290345	-2.36342985182194	2.04206366817581e-08	1.00154792385944e-06	8.06965188814623e-07	580	tags=45%, list=4%, signal=43%	POLA2/TOPBP1/MCM6/MCM3/MCMDC2/MCM5/ORC6/MCM2/PRIM1/MCM7/MCM4/POLE2/CDC6/CCNE2/ORC1/CDC45/MCM10
GO:1902750	GO:1902750	negative regulation of cell cycle G2/M phase transition	99	-0.621927948545942	-2.23390798478366	2.33279446140228e-08	1.13373810824151e-06	9.13473199622787e-07	2410	tags=45%, list=17%, signal=38%	HUS1/RAD21/BRCC3/NBN/PSMA7/DONSON/PSMD10/PSMD3/AVEN/PSMC5/PSMC6/PSME3/PSMB4/PSMA1/PSME2/PSMB6/PSMA2/TOPBP1/PSMD14/PSMD11/BLM/PSMA6/PSMA3/PSMB5/PSMB3/PSMC2/PSMB7/PSMC1/RBX1/PSMB1/PSMB9/PSMA5/PSMB2/PSMA4/FHL1/CHEK1/BRCA1/AURKA/CDC6/PLK1/ORC1/AURKB/DTL/CLSPN/CDK1
GO:0034660	GO:0034660	ncRNA metabolic process	448	-0.413209120181243	-1.7635468618811	2.51540266237521e-08	1.21147230928449e-06	9.76105044517721e-07	3746	tags=42%, list=27%, signal=31%	KRR1/INTS11/C1D/QRSL1/NOL10/PRORSD1P/TOE1/GATC/FTSJ3/ERCC2/PRKDC/BYSL/GATB/UTP6/EXOSC6/XPO5/NPM3/DDX52/RPP40/NOL6/INTS2/NARS1/TRMT2B/TRMT11/MTREX/TFB1M/NOP14/XRN2/WDR18/RC3H1/UTP15/PUSL1/UTP4/RPS28/ADAT1/AARSD1/DARS1/ELAC1/IMP4/LARP7/RC3H2/QTRT2/NGDN/RSL1D1/METTL1/SSB/NAT10/LSM6/MARS1/MRTO4/ELP4/HEATR1/OSGEPL1/INTS4/POLR3K/DDX18/FARS2/RRP36/RPP14/RPL7L1/GARS1/ZNHIT3/NFKB1/PPA2/METTL2A/NOL9/METTL1…
GO:0051052	GO:0051052	regulation of DNA metabolic process	289	-0.45886320946385	-1.87841201639971	3.03022888595021e-08	1.44639318074016e-06	1.16538501891995e-06	1738	tags=23%, list=12%, signal=21%	NPM2/ZNF93/KPNA1/TWIST1/NUCKS1/CGAS/CCT6A/ZMPSTE24/ACTR2/XRCC5/ANKRD1/WT1/PRMT5/TP53/MLH1/SUB1/CCT8/GNL3L/HMGB1/TNFSF4/BLM/EYA3/DFFA/GNL3/TFDP1/UBE2N/UBE2V2/OGG1/CCT3/DKC1/PCNA/HNRNPA2B1/AUNIP/TIMELESS/HSP90AB1/CCT5/PARP1/PARPBP/PPP4R2/RFC5/RPS3/NPM1/CCT2/HNRNPD/HNRNPA1/FANCB/PTPRC/SHLD1/RMI2/KPNA2/CHTF18/ZRANB3/RAD51/DDX39B/RFC2/TOX/CHEK1/BRCA1/RFC3/RFC4/POLQ/FOXM1/RAD51AP1/AURKB/IL7R/HGF/NEK2
GO:1903311	GO:1903311	regulation of mRNA metabolic process	286	-0.464399864061718	-1.90110205022365	5.3445100263751e-08	2.52847350451339e-06	2.03723661182365e-06	3722	tags=45%, list=27%, signal=34%	DHX9/MYD88/ANP32A/SNRNP70/FXR1/VIRMA/PSME4/PSMC4/SFSWAP/LARP1/AKT1/EXOSC6/SUPT6H/RBM24/CNOT8/TENT5C/HNRNPA0/SRSF6/PSME1/SRSF4/PTCD2/CDC73/QKI/LARP4B/HSPB1/RC3H1/METTL14/HNRNPC/LARP7/RC3H2/TIA1/SRSF9/PTBP1/EIF4G1/APEX1/SRPK1/SNW1/SAP18/FTO/SLTM/CWC22/YBX1/XPO1/HNRNPU/PSMA7/PABPN1/SRSF10/SNRPA/PSMD10/UBB/PSMD3/RBM4/DAZAP1/THRAP3/PNPT1/SERBP1/NCBP1/PSMC5/EXOSC7/RBM23/PSMC6/FASTKD2/TARDBP/PRKCA/PSME3…
GO:0010972	GO:0010972	negative regulation of G2/M transition of mitotic cell cycle	88	-0.629664846824246	-2.21388332511964	6.08533062109451e-08	2.85369978073432e-06	2.29927727622518e-06	2410	tags=48%, list=17%, signal=40%	HUS1/RAD21/NBN/PSMA7/DONSON/PSMD10/PSMD3/AVEN/PSMC5/PSMC6/PSME3/PSMB4/PSMA1/PSME2/PSMB6/PSMA2/TOPBP1/PSMD14/PSMD11/BLM/PSMA6/PSMA3/PSMB5/PSMB3/PSMC2/PSMB7/PSMC1/RBX1/PSMB1/PSMB9/PSMA5/PSMB2/PSMA4/FHL1/CHEK1/BRCA1/AURKA/CDC6/ORC1/AURKB/CLSPN/CDK1
GO:0008608	GO:0008608	attachment of spindle microtubules to kinetochore	32	-0.810322532709309	-2.38011519093577	6.25755695942737e-08	2.90894778305206e-06	2.34379158608483e-06	531	tags=47%, list=4%, signal=45%	ZNF207/RMDN1/CDC42/BUB3/CENPE/RACGAP1/NUF2/CCNB1/SGO1/SPAG5/AURKB/NDC80/KIF2C/NEK2/KNL1
GO:0072331	GO:0072331	signal transduction by p53 class mediator	238	-0.479145298992676	-1.92213548974315	6.69479525306818e-08	3.08537719162952e-06	2.48594393607577e-06	2414	tags=34%, list=17%, signal=28%	RBBP8/HUS1/TAF12/TAF11/SUPT16H/NBN/KDM1A/RBBP7/RHNO1/TRIAP1/CNOT6/EHMT1/PSMD10/UBB/MSH2/CHEK2/MDM4/CNOT9/CNOT2/TAF10/RBBP4/PMAIP1/TWIST1/PYCARD/ZMPSTE24/ANKRD1/PCBP4/PRMT5/TP53/TOPBP1/RPL5/PRKAA1/RAD9B/PRMT1/PRMT6/RPL26/PAK1IP1/BLM/TAF9/RPF2/TAF5/SSRP1/TTC5/HDAC1/TFDP1/RPL11/RPL23/PCNA/CDK2/CASP2/TAF9B/KMT5A/RFC5/ING5/RPS7/BCL2L12/EEF1E1/RPA3/RMI1/RMI2/DNA2/RFC2/CHEK1/BRCA1/RFC3/RFC4/BRIP1/E2F7/A…
GO:0071826	GO:0071826	ribonucleoprotein complex subunit organization	191	-0.504806069946592	-1.98196274437451	7.49361248365098e-08	3.42400447329899e-06	2.75878203176786e-06	3415	tags=43%, list=24%, signal=33%	SRSF6/DENR/RPL3/EIF3C/SNUPN/SNRPC/CDC73/NLE1/ZFAND1/POLR2D/RSL24D1/RPS28/LUC7L2/EIF4B/SRSF9/EIF2S2/MRTO4/SRPK1/RPL3L/ISY1/ZNHIT3/EIF2S3B/HSP90AA1/RPS10/RAMAC/XAB2/PRPF3/SRSF10/GEMIN6/EIF3D/MRPL20/PRPF18/NCBP1/SF3B1/PIH1D2/FASTKD2/RPS5/EIF3E/EIF3H/XRCC5/EIF3L/PRMT5/RPL5/RUVBL2/SNRPD3/TAF9/ERAL1/RPF2/RPL38/RPL24/WDR77/EIF3M/LSM2/RPL11/RBMX/SF3A3/EIF2S3/DDX1/SNRPF/RPS27/CPSF6/SHQ1/EIF6/EIF3J/SNRPG/S…
GO:0045132	GO:0045132	meiotic chromosome segregation	54	-0.713803664689106	-2.31122974936835	8.72111834126927e-08	3.9511100552903e-06	3.18348048639374e-06	1770	tags=46%, list=13%, signal=41%	SMC2/NDC1/RAD51C/ACTR2/P3H4/MLH1/CENPX/FANCM/SMC4/AGO4/EME1/RMI1/SGO2/FANCD2/BRIP1/TRIP13/NUF2/CCNE2/PLK1/BUB1B/SGO1/PTTG1/BUB1/TOP2A/TTK
GO:0022616	GO:0022616	DNA strand elongation	25	-0.829946461179417	-2.31202275778937	9.50054502492134e-08	4.2680599750613e-06	3.43885274143991e-06	748	tags=52%, list=5%, signal=49%	PCNA/POLD3/MCM3/LIG3/MCMDC2/DNA2/RFC3/RFC4/MCM7/GINS1/MCM4/GINS4/GINS2
GO:0022618	GO:0022618	ribonucleoprotein complex assembly	184	-0.513973403524921	-2.00696493079717	9.66619974094687e-08	4.30629198459183e-06	3.46965695964514e-06	3415	tags=45%, list=24%, signal=34%	SRSF6/DENR/RPL3/EIF3C/SNUPN/SNRPC/CDC73/NLE1/POLR2D/RSL24D1/RPS28/LUC7L2/EIF4B/SRSF9/EIF2S2/MRTO4/SRPK1/RPL3L/ISY1/ZNHIT3/EIF2S3B/HSP90AA1/RPS10/RAMAC/XAB2/PRPF3/SRSF10/GEMIN6/EIF3D/MRPL20/PRPF18/NCBP1/SF3B1/PIH1D2/FASTKD2/RPS5/EIF3E/EIF3H/XRCC5/EIF3L/PRMT5/RPL5/RUVBL2/SNRPD3/TAF9/ERAL1/RPF2/RPL38/RPL24/WDR77/EIF3M/LSM2/RPL11/RBMX/SF3A3/EIF2S3/DDX1/SNRPF/RPS27/CPSF6/SHQ1/EIF6/EIF3J/SNRPG/SNRPD2/E…
GO:0007098	GO:0007098	centrosome cycle	112	-0.581602593907515	-2.11125216762026	1.01372961182132e-07	4.47884173950149e-06	3.6086834028472e-06	759	tags=17%, list=5%, signal=16%	HAUS8/CDK2/NPM1/STIL/RBM14/XRCC2/CCNF/CHEK1/BRCA1/AURKA/BRCA2/KIF11/PLK1/SGO1/PLK4/NDC80/CDK1/PCLAF/NEK2
GO:0051054	GO:0051054	positive regulation of DNA metabolic process	166	-0.518472106889052	-2.00983756134754	1.08007716880022e-07	4.73286274131637e-06	3.81335269605737e-06	1494	tags=24%, list=11%, signal=22%	ACTR2/XRCC5/WT1/MLH1/CCT8/HMGB1/TNFSF4/EYA3/GNL3/UBE2N/UBE2V2/CCT3/DKC1/PCNA/HNRNPA2B1/TIMELESS/HSP90AB1/CCT5/PARP1/RFC5/RPS3/CCT2/HNRNPD/HNRNPA1/FANCB/PTPRC/SHLD1/CHTF18/RAD51/DDX39B/RFC2/TOX/BRCA1/RFC3/RFC4/FOXM1/RAD51AP1/AURKB/HGF/NEK2
GO:0002181	GO:0002181	cytoplasmic translation	98	-0.611660800295345	-2.18855135003934	1.12741577130401e-07	4.90013391332621e-06	3.94812609000942e-06	3038	tags=58%, list=22%, signal=46%	RPS28/RPL8/CPEB2/ETF1/EIF4B/RPL36/EIF4G1/EIF2S2/EEF2/TMA7/EIF2S3B/DPH5/DNAJC24/RBM4/EIF3D/EIF3E/EIF3H/PKM/EIF3L/DRG1/RPL19/RPL31/RPL35A/RPL26/RPL15/RPL41/RPL22/GSPT1/DPH6/EIF2B3/RPL26L1/RPL38/RPL39/RPL24/RPL17/EIF4A1/EIF3M/RPL36A/RPL30/RPL11/RPL9/EIF2S3/EIF3J/EIF3K/RPL32/RPS26/RPS29/RPS21/EIF3I/RPL10A/MCTS1/RPL6/RPS23/RPLP0P6/RPLP0/RPSA/RPL22L1
GO:0010876	GO:0010876	lipid localization	318	0.408565990991733	1.77035836545369	1.35380766041748e-07	5.83665786499341e-06	4.70270029408176e-06	2038	tags=23%, list=15%, signal=20%	AGT/CD36/SLC1A2/PPFIA4/PTGES/LIPG/ACVR1C/FABP3/PLA2G4A/REN/APOB/ATP8B4/ABCC3/PSAP/FABP4/PLA2G4C/APOD/ATP9A/PCSK9/PRKN/OSBPL10/VLDLR/NPC1/NPC2/LRP10/MSR1/PLA2R1/SYT7/LCAT/HEXB/SPP1/SCARB2/OSBPL8/PLTP/PLSCR4/AKR1C1/SLCO2A1/P2RX4/SLC2A1/TSKU/GM2A/AUP1/C1QTNF1/CHKA/SELENOM/TMEM30A/GLS/ESYT2/PLIN2/SLC1A1/SLC27A1/TEX2/P2RX7/SLC38A2/STARD5/SNAP25/SLC7A11/ATP10D/BSCL2/ACACB/CROT/LRP1/ZFYVE1/AKT2/PRKAA2/F…
GO:0000723	GO:0000723	telomere maintenance	136	-0.547643146287795	-2.05286781230091	1.46408715261228e-07	6.2616079342922e-06	5.0450902134648e-06	1610	tags=35%, list=11%, signal=31%	HSP90AA1/HUS1/XRCC6/GAR1/POLA1/NBN/TCP1/HNRNPU/SMC5/TPRKB/RAD51C/CCT6A/NOP10/XRCC5/POLA2/CCT8/GNL3L/BLM/DCLRE1C/GNL3/CCT3/DKC1/PCNA/HNRNPA2B1/HSP90AB1/POLD3/CCT5/PARP1/RFC5/CCT2/HNRNPD/HNRNPA1/RPA3/RAD51/DNA2/RFC2/FEN1/RFC3/RFC4/PRIM1/H4C3/BRCA2/POLE2/EXO1/CCNE2/AURKB/NEK2
GO:0000281	GO:0000281	mitotic cytokinesis	63	-0.677357851756519	-2.24647667702436	1.67446314845754e-07	7.10450792988411e-06	5.72422991101774e-06	1003	tags=22%, list=7%, signal=21%	CIT/CKAP2/ARL3/STMN1/CENPA/KIF23/KIF20B/RACGAP1/PLK1/NUSAP1/CEP55/ANLN/KIF4A/KIF20A
GO:0032200	GO:0032200	telomere organization	141	-0.541397216748718	-2.0308947193169	2.050708201838e-07	8.63235121813067e-06	6.95524074755168e-06	2767	tags=38%, list=20%, signal=30%	NAT10/H3-3A/RFC1/APEX1/NEK7/HSP90AA1/HUS1/XRCC6/GAR1/POLA1/NBN/TCP1/HNRNPU/H3-3B/SMC5/TPRKB/RAD51C/CCT6A/NOP10/XRCC5/POLA2/CCT8/GNL3L/BLM/DCLRE1C/GNL3/CCT3/DKC1/PCNA/HNRNPA2B1/HSP90AB1/POLD3/CCT5/PARP1/RFC5/CCT2/HNRNPD/HNRNPA1/RPA3/RAD51/DNA2/RFC2/FEN1/RFC3/RFC4/PRIM1/H4C3/BRCA2/POLE2/EXO1/CCNE2/AURKB/NEK2
GO:0098657	GO:0098657	import into cell	135	0.519738466920119	2.02642616737861	2.2357382355834e-07	9.33770047455378e-06	7.52355333882175e-06	2710	tags=39%, list=19%, signal=31%	CD36/SLC1A2/LRP2/KCNJ2/MX1/RGS4/RGS2/FABP3/SLC30A1/ISCU/PRNP/TRPV1/MX2/SLC12A7/PRKN/FYN/SLC15A3/TRPV2/SLC3A2/ITGA4/SLC9A1/KCNJ14/TOR1A/SLC9A7/GPM6B/SLC5A3/SLC2A1/SLC47A1/RAB3B/SLC1A1/SLC27A1/SLC6A6/SNAP25/SLC7A11/OPHN1/SLC22A4/ATP1B3/AKT2/KCNJ3/TRPV3/SLC12A6/SLC12A8/HFE/SLC19A1/SLC24A1/SLC12A4/SLC2A5/SLC38A1/ITGB3/THBS1/WNK3/CACNA2D1
GO:0043044	GO:0043044	ATP-dependent chromatin remodeling	72	-0.638553463809508	-2.16230229263585	2.73199484115488e-07	1.13218948998558e-05	9.1222545002087e-06	1268	tags=42%, list=9%, signal=38%	CENPL/RBBP7/OIP5/CENPS/SMARCB1/RBBP4/NASP/SMARCC1/ACTR6/ACTL6A/HDAC1/SMARCE1/CENPX/INO80/CENPO/ACTB/CENPQ/ITGB3BP/NPM1/CENPW/CENPA/ANP32E/H4C3/CENPM/CENPI/CENPU/CENPK/HJURP/CENPN/KNL1
GO:0034508	GO:0034508	centromere complex assembly	47	-0.720772287221	-2.2409874904669	2.75993695596655e-07	1.13497099743055e-05	9.14466560632804e-06	717	tags=57%, list=5%, signal=55%	CENPL/RBBP7/OIP5/CENPS/H3-3B/POGZ/RBBP4/NASP/HELLS/CENPX/CENPO/CENPQ/ITGB3BP/NPM1/CENPW/CENPA/CENPE/H4C3/CENPM/CENPI/CENPU/CENPK/HJURP/CENPN/CENPF/KNL1/DLGAP5
GO:0050801	GO:0050801	ion homeostasis	467	0.370417448629066	1.66043407919838	3.76753872016477e-07	1.53750091587793e-05	1.23879216094128e-05	2354	tags=23%, list=17%, signal=20%	CCL7/AGT/FAM20A/SLC40A1/CD36/PDK4/STC1/SFRP4/KLHL3/KCNJ2/IFI6/SLC4A11/TMEM178A/MT2A/CXCR6/FTH1/SLC30A1/ISCU/LRRK2/ATP2A2/PRNP/PTGER3/CA12/TRPV1/TMEM38B/PTGIR/CYBRD1/EPAS1/GRIA1/SLC31A2/ACKR4/PACS2/SLC12A7/PRKN/TPCN1/TGM2/FYN/ATP6AP2/CD55/GRN/GPR18/TRPV2/CACNA1C/HEXB/WFS1/HVCN1/ATP6AP1L/SLC9A1/AQP11/ATP6AP1/ATP6V1A/PLCG2/ADM/MLLT6/SLC9A7/GPER1/P2RX4/PML/STEAP2/CEMIP/FTL/C1QTNF1/KCTD7/MT1X/GLS/F2RL…
GO:0031023	GO:0031023	microtubule organizing center organization	119	-0.558185967087934	-2.05113618311494	4.0185238306643e-07	1.62750215141904e-05	1.31130777632203e-05	759	tags=16%, list=5%, signal=15%	HAUS8/CDK2/NPM1/STIL/RBM14/XRCC2/CCNF/CHEK1/BRCA1/AURKA/BRCA2/KIF11/PLK1/SGO1/PLK4/NDC80/CDK1/PCLAF/NEK2
GO:0006323	GO:0006323	DNA packaging	165	-0.510318406840846	-1.97740099458542	4.21885182138005e-07	1.69578810805246e-05	1.36632700064006e-05	1934	tags=27%, list=14%, signal=24%	H3-3B/SMC5/SUV39H1/SMC2/IPO4/RBBP4/SET/DAXX/NASP/HAT1/TP53/TSPYL4/HMGB1/HELLS/HDAC1/BANF1/CENPX/TET1/CENPO/DNMT1/CENPQ/SMC4/CHAF1A/ITGB3BP/NPM1/MCM2/CENPW/CENPA/NCAPG2/H4C3/CENPM/HMGB2/CENPI/CENPU/CENPK/CHAF1B/CDCA5/CCNB1/HJURP/CENPN/NCAPG/NUSAP1/TOP2A/NCAPH/KNL1
GO:0090307	GO:0090307	mitotic spindle assembly	58	-0.676286960908637	-2.21892363407125	4.61795652051275e-07	1.84235787751203e-05	1.48442090195901e-05	193	tags=36%, list=1%, signal=36%	HNRNPU/KIF2A/CHEK2/SMC1A/RHOA/KPNB1/DRG1/FLNA/BCCIP/ZNF207/MZT1/KIF23/RACGAP1/TPX2/KIF11/PLK1/PRC1/AURKB/CDC20/NEK2/KIF4A
GO:0000727	GO:0000727	double-strand break repair via break-induced replication	12	-0.926174530330694	-2.18933497878985	5.44842267282606e-07	2.15757537843912e-05	1.73839731596134e-05	944	tags=92%, list=7%, signal=86%	MCM6/MCM3/MCMDC2/MCM5/MCM2/MCM7/CDC7/MCM4/GINS4/CDC45/GINS2
GO:0006520	GO:0006520	cellular amino acid metabolic process	250	-0.456900172676634	-1.84704942275672	5.65632267397866e-07	2.22343389816837e-05	1.79146071067497e-05	2208	tags=34%, list=16%, signal=30%	HIBCH/PSMA7/MTAP/OGDH/EPRS1/AZIN1/OAT/PSMD10/PSMD3/YARS2/LARS1/GART/IARS1/NQO1/AASS/AIMP1/PSMC5/PSMC6/SCLY/QARS1/PSME3/ADI1/PSMB4/ALDH6A1/PSMA1/PSME2/ALDH18A1/PSMB6/KARS1/PSMA2/TARS1/PLOD2/MTHFD1/CPS1/RARS1/CTH/PSMD14/PSMD11/PSMA6/AFMID/PSMA3/PSMB5/PSMB3/MSRA/PSMC2/SLC25A12/PYCR1/WARS2/CTPS1/HNMT/HSD17B10/MCCC2/GGT1/GOT1/PSMB7/PSMC1/MPST/DLD/AIMP2/EARS2/PSMB1/PSMB9/ALDH7A1/PSMA5/PFAS/PARK7/PSMB2/…
GO:0006364	GO:0006364	rRNA processing	219	-0.47217811934579	-1.87260906000319	6.22081382877114e-07	2.42747961522704e-05	1.95586401746688e-05	3831	tags=48%, list=27%, signal=36%	MRM2/RPF1/FRG1/KRR1/C1D/NOL10/FTSJ3/ERCC2/PRKDC/BYSL/UTP6/EXOSC6/NPM3/DDX52/RPP40/NOL6/MTREX/TFB1M/NOP14/XRN2/WDR18/UTP15/UTP4/RPS28/IMP4/NGDN/RSL1D1/NAT10/LSM6/MRTO4/HEATR1/DDX18/RRP36/RPL7L1/ZNHIT3/NOL9/METTL15/RPL35/METTL5/GAR1/WBP11/UTP20/WDR12/PDCD11/NSA2/GTF2H5/WDR75/SUV39H1/DDX21/NIFK/EXOSC7/NOL11/PIH1D2/RIOK2/WDR3/FCF1/NSUN3/NOP56/NOP10/EIF4A3/NSUN4/DDX47/GTPBP4/RPL5/DCAF13/RPL35A/RPL26/E…
GO:0016072	GO:0016072	rRNA metabolic process	226	-0.464711293277678	-1.84998732475894	6.65097660168841e-07	2.57653050091495e-05	2.07595699878787e-05	3831	tags=47%, list=27%, signal=35%	MRM2/RPF1/FRG1/KRR1/C1D/NOL10/FTSJ3/ERCC2/PRKDC/BYSL/UTP6/EXOSC6/NPM3/DDX52/RPP40/NOL6/MTREX/TFB1M/NOP14/XRN2/WDR18/UTP15/UTP4/RPS28/IMP4/NGDN/RSL1D1/NAT10/LSM6/MRTO4/HEATR1/DDX18/RRP36/RPL7L1/ZNHIT3/NOL9/METTL15/RPL35/METTL5/GAR1/WBP11/UTP20/WDR12/PDCD11/NSA2/GTF2H5/WDR75/SUV39H1/DDX21/NIFK/EXOSC7/NOL11/PIH1D2/RIOK2/WDR3/FCF1/NSUN3/NOP56/NOP10/EIF4A3/NSUN4/DDX47/GTPBP4/RPL5/DCAF13/RPL35A/RPL26/E…
GO:0071459	GO:0071459	protein localization to chromosome, centromeric region	24	-0.824958410389042	-2.27134148964355	6.70603155764837e-07	2.57916868397037e-05	2.07808263035949e-05	693	tags=46%, list=5%, signal=44%	CENPQ/BUB3/ZWILCH/CENPA/SPDL1/BUB1B/AURKB/NDC80/CDK1/TTK/KNL1
GO:0051656	GO:0051656	establishment of organelle localization	343	-0.428216204432348	-1.79122362026143	6.76738878946149e-07	2.58417574774722e-05	2.08211691176514e-05	2037	tags=22%, list=15%, signal=19%	UBB/C12orf4/EML4/TMED2/NUP88/SYNE2/MAP1B/GOSR1/SLC9A3R1/WASF1/CHMP4A/GOSR2/SEH1L/PIK3CD/RIOK2/BOD1/YWHAZ/PDCD10/KPNB1/SAR1B/TRAPPC4/PEX14/ACTR2/PAFAH1B1/SCFD1/AP3M1/MLH1/CDC23/SEC24D/SYT11/EZR/CTSC/DYNLT1/GPSM2/TRAPPC1/ABCE1/RMDN1/COPG1/EIF6/STARD3NL/LIN7A/CENPQ/MYO19/MYH9/RAN/CFL1/KIF18A/NLGN1/CDC42/NPM1/SAR1A/ACTN4/AP1M2/MILR1/MYO5B/CENPA/CENPE/TCIRG1/PSRC1/MAD2L1/SPDL1/CDCA5/NUF2/CCNB1/PLK1/SP…
GO:0090150	GO:0090150	establishment of protein localization to membrane	302	-0.445158603569979	-1.83657195191994	7.45055202576297e-07	2.82486887444885e-05	2.27604769611214e-05	2447	tags=40%, list=17%, signal=34%	ZDHHC21/MMGT1/RPS28/RPL8/MYO1C/SRP14/ZDHHC6/PEX26/RPL36/TIMM9/ROMO1/NACA2/YWHAG/SRP19/TRAM1L1/MICALL1/SRP54/HSP90AA1/PEX19/RPS10/PDCD5/RPL35/ACSL3/SRP72/EMC1/SRP9/TCAF2/HSPA5/HSPA4/TRAM2/MAIP1/SRPRA/BLZF1/BCS1L/SSR3/NACA/CHMP4A/RPS5/PMAIP1/LYPLA1/KRT18/YWHAZ/RAB8B/YWHAE/PEX3/CALM3/ATP1B1/RAB8A/TP53/RPL34/RPL5/RPL19/RPL31/NACA4P/RPL12/RPL35A/RPL26/YIF1B/RPL15/RPL27A/RPL41/RPL22/YWHAH/RPL38/RPS8/RP…
GO:0034470	GO:0034470	ncRNA processing	372	-0.410212339197634	-1.72538483500637	7.60729356720906e-07	2.86398531058448e-05	2.30756451275163e-05	3161	tags=35%, list=23%, signal=28%	NOP14/XRN2/WDR18/UTP15/PUSL1/UTP4/RPS28/ADAT1/ELAC1/IMP4/LARP7/QTRT2/NGDN/RSL1D1/METTL1/SSB/NAT10/LSM6/MRTO4/ELP4/HEATR1/OSGEPL1/INTS4/POLR3K/DDX18/FARS2/RRP36/RPP14/RPL7L1/ZNHIT3/METTL2A/NOL9/METTL15/RPL35/METTL5/GAR1/WBP11/UTP20/CDKAL1/METTL6/TYW3/RTCB/WDR12/PDCD11/NSA2/PRORP/TRMU/GTF2H5/WDR75/SUV39H1/TPRKB/ZBTB8OS/DDX21/NIFK/PUS7/EXOSC7/NOL11/PIH1D2/INTS14/TSEN15/RIOK2/MTO1/WDR3/FCF1/NSUN3/KAR…
GO:0032465	GO:0032465	regulation of cytokinesis	66	-0.658094750002623	-2.19710423803707	7.8218103750129e-07	2.92415372481251e-05	2.35604328704842e-05	733	tags=24%, list=5%, signal=23%	CALM2/MYO19/CDC42/KIF23/KIF20B/RACGAP1/E2F7/AURKA/BRCA2/CDC6/PLK1/PRC1/PLK4/AURKB/KIF14/KIF20A
GO:0001501	GO:0001501	skeletal system development	314	0.397859117389553	1.71404333450115	8.40198946410225e-07	3.11923858854796e-05	2.51322667303409e-05	1832	tags=22%, list=13%, signal=20%	CHI3L1/PTHLH/SULF2/TGFBI/STC1/MGP/SFRP4/PRELP/MMP2/ITGB8/EFEMP1/FST/RDH10/CYP26B1/PLXNB1/DHRS3/WNT2B/TMEM38B/EVC/BMP2/RUNX1/NOG/CSGALNACT1/DEAF1/SIGLEC15/CCN2/TGFBR2/TIPARP/CCN3/HEXB/ANKH/LOX/SLC38A10/TGFB1/BMPR1B/SCIN/ATP6AP1/WDR19/NPR2/TRIM45/TSKU/SFRP1/GPLD1/KIAA1217/TIMP1/DYNC2I1/THRA/BMP4/CTC1/HYAL2/BBS2/GREM1/PLEKHA1/SPEF2/SOX4/P3H1/LUM/SLC9B2/TGFBR1/MKKS/TMEM107/SEMA4D/LRRK1/SMAD7/HOXA11/R…
GO:0061640	GO:0061640	cytoskeleton-dependent cytokinesis	84	-0.612120700841996	-2.13055303567064	8.52286995613491e-07	3.1422939852067e-05	2.53180282108922e-05	371	tags=29%, list=3%, signal=28%	SEPTIN7/MITD1/SEPTIN6/ECT2/SEPTIN9/RHOA/CHMP4A/ACTR2/SEPTIN2/CIT/CKAP2/ARL3/STMN1/CENPA/KIF23/KIF20B/RACGAP1/PLK1/AURKB/NUSAP1/CEP55/ANLN/KIF4A/KIF20A
GO:0098771	GO:0098771	inorganic ion homeostasis	436	0.372350983030558	1.66266560959213	1.01100847643367e-06	3.70195295548933e-05	2.98273012658009e-05	2354	tags=23%, list=17%, signal=20%	CCL7/AGT/FAM20A/SLC40A1/CD36/PDK4/STC1/SFRP4/KCNJ2/TMEM178A/MT2A/CXCR6/FTH1/SLC30A1/ISCU/LRRK2/ATP2A2/PRNP/PTGER3/CA12/TRPV1/TMEM38B/PTGIR/CYBRD1/EPAS1/GRIA1/SLC31A2/ACKR4/PACS2/SLC12A7/PRKN/TPCN1/TGM2/FYN/ATP6AP2/CD55/GRN/GPR18/TRPV2/CACNA1C/HEXB/WFS1/HVCN1/ATP6AP1L/SLC9A1/AQP11/ATP6AP1/ATP6V1A/PLCG2/ADM/MLLT6/SLC9A7/GPER1/P2RX4/PML/STEAP2/CEMIP/FTL/C1QTNF1/MT1X/F2RL2/HYAL2/ACO1/CKB/SLC1A1/P2RX7…
GO:0055080	GO:0055080	cation homeostasis	430	0.369475805065905	1.64188638430743	1.02417877801211e-06	3.72466649472974e-05	3.00103083396028e-05	2354	tags=23%, list=17%, signal=20%	CCL7/AGT/FAM20A/SLC40A1/CD36/PDK4/STC1/KCNJ2/SLC4A11/TMEM178A/MT2A/CXCR6/FTH1/SLC30A1/ISCU/LRRK2/ATP2A2/PRNP/PTGER3/TRPV1/TMEM38B/PTGIR/CYBRD1/EPAS1/GRIA1/SLC31A2/ACKR4/PACS2/SLC12A7/PRKN/TPCN1/TGM2/FYN/ATP6AP2/CD55/GRN/GPR18/TRPV2/CACNA1C/HEXB/WFS1/HVCN1/ATP6AP1L/SLC9A1/AQP11/ATP6AP1/ATP6V1A/PLCG2/ADM/MLLT6/SLC9A7/GPER1/P2RX4/PML/STEAP2/CEMIP/FTL/C1QTNF1/MT1X/F2RL2/HYAL2/ACO1/SLC1A1/P2RX7/ATP6V0…
GO:2000573	GO:2000573	positive regulation of DNA biosynthetic process	57	-0.671331612103395	-2.19461957774592	1.20953450934182e-06	4.36903478847391e-05	3.52020996602187e-05	783	tags=28%, list=6%, signal=27%	CCT3/DKC1/PCNA/HSP90AB1/CCT5/RFC5/CCT2/HNRNPA1/CHTF18/DDX39B/RFC2/RFC3/RFC4/AURKB/HGF/NEK2
GO:0010639	GO:0010639	negative regulation of organelle organization	286	-0.43910408521127	-1.7975493561854	1.52487669561582e-06	5.46534958499412e-05	4.40353052981983e-05	1152	tags=16%, list=8%, signal=15%	NBDY/CAPZB/CORO1B/ZNF207/CAPZA1/TET1/SLC25A5/KNTC1/PFN1/CARMIL1/TMSB10/ANAPC15/SLIT2/PARP1/TMEM39A/MAPRE1/NPM1/TSPO/HNRNPA1/RBM14/STMN1/BUB3/MCM2/CCNF/CHEK1/BRCA1/FBXO5/MAD2L1/TPX2/SPDL1/TRIP13/CCNB1/PLK1/BUB1B/PTTG1/ZWINT/AURKB/NDC80/CENPF/BUB1/TOP2A/HGF/CDC20/TMSB15A/TTK
GO:0006415	GO:0006415	translational termination	104	-0.565518510837255	-2.05357608101392	1.53925741057153e-06	5.46534958499412e-05	4.40353052981983e-05	3009	tags=50%, list=21%, signal=40%	MRPL36/MRPL58/ETF1/MRPS31/MRPL14/PTCD3/DAP3/MRPS21/MTRFR/MRPL39/MRPL45/MRPS23/MRPL11/MRPL37/MRPL20/MRPL17/MRPS35/MRPS17/MRPL18/MRPS18C/MTRF1/MRPL21/MRPL30/MRPS18B/MRPL3/MRPL35/MRPS27/MRPL15/MRPL52/MRPS36/MRPS28/GSPT1/ERAL1/MRPL51/EIF5AL1/MRPL47/MRPL33/MRPS9/MRPL4/MRPL13/MRPL42/MRPL22/ABCE1/MRPL40/MRPL1/MRPS22/MRPL24/MRPL27/MRPL48/MRPS33/MRPS14/MRRF
GO:0031570	GO:0031570	DNA integrity checkpoint	145	-0.522421055735493	-1.96598156954696	1.55315504271149e-06	5.46534958499412e-05	4.40353052981983e-05	2173	tags=31%, list=16%, signal=26%	RHNO1/TRIAP1/CNOT6/DONSON/CDC5L/MSH2/CHEK2/ATF2/MDM4/CNOT9/CNOT2/PCBP4/TP53/TOPBP1/TIPRL/RAD9B/PRMT1/RPL26/BLM/TFDP1/PCNA/CDK2/CASP2/TIMELESS/INTS7/EME1/DDX39B/DNA2/CHEK1/BRCA1/WDR76/FANCD2/BRIP1/E2F7/AURKA/CCNB1/CDC6/PLK1/ORC1/CDC45/GTSE1/DTL/CLSPN/CDC25C/CDK1
GO:0051216	GO:0051216	cartilage development	123	0.509351211953259	1.97092046718667	1.55393403838217e-06	5.46534958499412e-05	4.40353052981983e-05	1789	tags=28%, list=13%, signal=24%	CHI3L1/PTHLH/SULF2/TGFBI/STC1/MGP/ITGB8/EFEMP1/WNT2B/EVC/BMP2/RUNX1/NOG/CSGALNACT1/CCN2/TGFBR2/CCN3/TGFB1/BMPR1B/SCIN/TSKU/GPLD1/TIMP1/THRA/BMP4/HYAL2/BBS2/GREM1/LUM/TGFBR1/MKKS/SMAD7/HOXA11/TAPT1
GO:0042273	GO:0042273	ribosomal large subunit biogenesis	71	-0.618130084782696	-2.08379496237384	1.58995174257393e-06	5.55547844169948e-05	4.47614897186963e-05	2806	tags=59%, list=20%, signal=48%	RSL1D1/MRTO4/RPL3L/DDX18/RPL7L1/ZNHIT3/NOL9/RPL35/HEATR3/WDR12/NSA2/MRPL20/NIFK/NIP7/FASTKD2/GTPBP4/RPL5/RPL35A/RPL26/PAK1IP1/EBNA1BP2/SNU13/RPF2/RPL26L1/RPL38/RPL24/RPL14/RPL11/EIF6/RPL7A/RPL7/MRPL1/RRP15/MAK16/RPL23A/NPM1/RPL10A/RPL6/RPL10/RPL10L/RPLP0P6/RPLP0
GO:0032201	GO:0032201	telomere maintenance via semi-conservative replication	25	-0.798992623272151	-2.22579312608418	1.64773840903086e-06	5.72000619134998e-05	4.60871194104872e-05	748	tags=48%, list=5%, signal=46%	POLA2/PCNA/POLD3/RFC5/RPA3/DNA2/RFC2/FEN1/RFC3/RFC4/PRIM1/POLE2
GO:0006869	GO:0006869	lipid transport	284	0.405822329902608	1.74037537978741	1.72407919581315e-06	5.94640476181747e-05	4.79112534415443e-05	2038	tags=23%, list=15%, signal=20%	AGT/CD36/SLC1A2/PPFIA4/PTGES/LIPG/FABP3/PLA2G4A/REN/APOB/ATP8B4/ABCC3/PSAP/FABP4/APOD/ATP9A/PCSK9/PRKN/OSBPL10/VLDLR/NPC1/NPC2/LRP10/MSR1/PLA2R1/SYT7/LCAT/SPP1/SCARB2/OSBPL8/PLTP/PLSCR4/AKR1C1/SLCO2A1/P2RX4/SLC2A1/TSKU/GM2A/C1QTNF1/CHKA/SELENOM/TMEM30A/GLS/ESYT2/PLIN2/SLC1A1/SLC27A1/TEX2/P2RX7/SLC38A2/STARD5/SNAP25/SLC7A11/ATP10D/ACACB/CROT/LRP1/AKT2/PRKAA2/ABCB4/PDZD8/LDLRAP1/APOL1/ITGAV/SLC27A3…
GO:0007062	GO:0007062	sister chromatid cohesion	49	-0.685108029672883	-2.16701492710938	2.26766210601238e-06	7.77110360175781e-05	6.2613180417022e-05	246	tags=49%, list=2%, signal=48%	CTNNB1/WAPL/NSMCE2/SLF1/KIF22/SMC3/STAG1/RAD21/SFPQ/SMC5/SMC1A/POGZ/BOD1/RAD51C/HASPIN/SGO2/FEN1/CDCA5/PLK1/BUB1B/SGO1/BUB1/CDC20/ESCO2
GO:0098739	GO:0098739	import across plasma membrane	97	0.537597144970294	2.01152588352419	2.33589035510628e-06	7.95392983337464e-05	6.40862442715046e-05	2710	tags=41%, list=19%, signal=33%	CD36/SLC1A2/LRP2/KCNJ2/RGS4/RGS2/SLC30A1/ISCU/PRNP/TRPV1/SLC12A7/FYN/SLC15A3/TRPV2/SLC3A2/SLC9A1/KCNJ14/SLC9A7/SLC5A3/SLC2A1/SLC47A1/SLC1A1/SLC27A1/SLC6A6/SLC7A11/SLC22A4/ATP1B3/AKT2/KCNJ3/TRPV3/SLC12A6/SLC12A8/HFE/SLC19A1/SLC24A1/SLC12A4/SLC2A5/THBS1/WNK3/CACNA2D1
GO:1901796	GO:1901796	regulation of signal transduction by p53 class mediator	162	-0.501277155024157	-1.93221527668684	2.3857225180453e-06	8.07219783637354e-05	6.50391508583703e-05	2414	tags=38%, list=17%, signal=32%	RBBP8/HUS1/TAF12/TAF11/SUPT16H/NBN/KDM1A/RBBP7/RHNO1/TRIAP1/EHMT1/PSMD10/UBB/CHEK2/MDM4/TAF10/RBBP4/PMAIP1/TWIST1/ZMPSTE24/ANKRD1/PRMT5/TP53/TOPBP1/RPL5/PRKAA1/RAD9B/PRMT6/RPL26/PAK1IP1/BLM/TAF9/RPF2/TAF5/SSRP1/TTC5/HDAC1/RPL11/RPL23/CDK2/TAF9B/KMT5A/RFC5/ING5/RPS7/BCL2L12/EEF1E1/RPA3/RMI1/RMI2/DNA2/RFC2/CHEK1/BRCA1/RFC3/RFC4/BRIP1/AURKA/TPX2/BARD1/EXO1/AURKB
GO:0051383	GO:0051383	kinetochore organization	21	-0.830648579633682	-2.20758317176414	2.86040958684808e-06	9.61745261087411e-05	7.74895467022995e-05	619	tags=48%, list=4%, signal=46%	SMC4/CENPW/CENPA/CENPE/CENPK/NUF2/CENPN/NDC80/CENPF/DLGAP5
GO:0019748	GO:0019748	secondary metabolic process	31	0.711668465614013	2.13424325164528	3.55628550321353e-06	0.000118824389376122	9.57389492049328e-05	1715	tags=39%, list=12%, signal=34%	FMO2/FMO1/AKR1B1/AKR1B10/PAM/CYP1B1/CTNS/AKR1C1/SLC7A11/TRPC1/AKR1C2/NFE2L2
GO:0140353	GO:0140353	lipid export from cell	43	0.669545154094264	2.1811188334475	3.63193951307206e-06	0.000120598438738405	9.71683327067072e-05	1453	tags=33%, list=10%, signal=29%	AGT/SLC1A2/PPFIA4/PTGES/PLA2G4A/REN/SPP1/P2RX4/C1QTNF1/SELENOM/GLS/SLC1A1/SLC38A2/SNAP25
GO:0035825	GO:0035825	homologous recombination	40	-0.707850999082555	-2.16568884958515	3.69816933254459e-06	0.000122039587973972	9.83294925846164e-05	2371	tags=52%, list=17%, signal=44%	RAD21/CNTD1/CENPS/HSF2BP/RAD51B/RAD51C/NUCKS1/MLH1/CENPX/FANCM/RAD54B/EME1/RMI1/PSMC3IP/RAD51/FANCD2/BRIP1/TRIP13/RAD51AP1/RAD54L/TOP2A
GO:0003015	GO:0003015	heart process	164	0.452782921971012	1.80900310098182	3.88192262986993e-06	0.000127317536069231	0.000102582030361174	1839	tags=25%, list=13%, signal=22%	AGT/KCNH6/FGF13/PDE4B/STC1/KCNJ2/RGS4/RGS2/MYL3/ATP2A2/TMEM38B/TNNT2/EPAS1/ACTC1/GSN/FYN/TNNI3K/CCN2/CACNA1C/HSPB7/SLC9A1/KCNJ14/NOS1AP/ADM/NPR2/P2RX4/KCND2/MEF2A/THRA/GPX1/SLC1A1/DSP/EHD3/TRPC1/CACNB4/SMAD7/ATP1B3/GAA/KCNJ3/YAP1/POPDC2
GO:0042445	GO:0042445	hormone metabolic process	112	0.513210779865837	1.95721200824846	3.95780559591444e-06	0.000129014809242431	0.000103949553905532	1660	tags=30%, list=12%, signal=27%	PCSK6/CTSK/PCSK1/AKR1B1/RDH10/CYP26B1/REN/AKR1B10/DHRS3/BMP2/ATP6AP2/CTSL/TIPARP/SCPEP1/SPP1/CYP1B1/SCG5/ADM/DHCR7/AKR1C1/SELENOM/RETSAT/DIO2/MME/DKK3/ECE1/PLEKHA1/TTR/HSD17B12/CPQ/GCNT4/HSD17B2/BACE2/AKR1C2
GO:0006414	GO:0006414	translational elongation	129	-0.525987680619224	-1.94765673067603	4.24077866845617e-06	0.00013740122885798	0.000110706643134435	3009	tags=49%, list=21%, signal=39%	MRPL36/CPEB2/MRPL58/MRPS31/TRNAU1AP/MRPL14/EEF2/PTCD3/DAP3/MRPS21/GTPBP2/SRP9/MRPL39/MRPL45/USP16/DPH5/MRPS23/MRPL11/DNAJC24/EEF1A1/MRPL37/EEF1G/HBS1L/MRPL20/MRPL17/MRPS35/MRPS17/MRPL18/MRPS18C/MRPL21/MRPL30/MRPS18B/MRPL3/EIF4A3/MRPL35/MRPS27/MRPL15/MRPL52/MRPS36/MRPS28/ERAL1/DPH6/MRPL51/EIF5AL1/MRPL47/MRPL33/MRPS9/MRPL4/MRPL13/MRPL42/MRPL22/RPL30/MRPL40/RACK1/MRPL1/MRPS22/EEF2K/MRPL24/MRPL27/MRP…
GO:0008016	GO:0008016	regulation of heart contraction	130	0.487332110141585	1.91142029301205	4.359509202698e-06	0.00014039720600978	0.000113120555849336	1839	tags=28%, list=13%, signal=24%	AGT/KCNH6/FGF13/PDE4B/STC1/KCNJ2/RGS4/RGS2/MYL3/ATP2A2/TMEM38B/TNNT2/EPAS1/TNNI3K/CCN2/CACNA1C/HSPB7/SLC9A1/KCNJ14/NOS1AP/ADM/NPR2/P2RX4/KCND2/MEF2A/THRA/SLC1A1/DSP/EHD3/TRPC1/CACNB4/SMAD7/ATP1B3/GAA/KCNJ3/POPDC2
GO:2000278	GO:2000278	regulation of DNA biosynthetic process	93	-0.562273473144339	-1.99883475023063	4.84252127314996e-06	0.000155018675007543	0.000124901336588274	1590	tags=27%, list=11%, signal=24%	CCT6A/XRCC5/ANKRD1/TP53/CCT8/GNL3L/TFDP1/CCT3/DKC1/PCNA/HNRNPA2B1/HSP90AB1/CCT5/RFC5/CCT2/HNRNPD/HNRNPA1/CHTF18/DDX39B/RFC2/RFC3/RFC4/AURKB/HGF/NEK2
GO:0006403	GO:0006403	RNA localization	213	-0.455363201539489	-1.7933624855399	4.91403210584009e-06	0.000156371521653697	0.000125991349480562	3661	tags=46%, list=26%, signal=35%	FLOT1/POLDIP3/LRPPRC/AGFG1/XPO5/SUPT6H/NUP153/SRSF6/NOL6/NUP107/SNUPN/GLE1/NUP205/CCT7/SRSF4/QKI/POLR2D/NMD3/MYO1C/CCT4/CHTOP/SRSF9/NXT2/SSB/AHCTF1/UPF3B/CPSF3/ZNHIT3/PARP11/YBX1/ALYREF/XPO1/DDX19B/HNRNPA1L2/TCP1/HNRNPU/NUP93/RAE1/PABPN1/SFPQ/NUP88/PRPF18/PNPT1/TSC1/FYTTD1/NUP85/NCBP1/CKAP5/XPOT/SEH1L/MRPL18/PHAX/ZFP36/NDC1/RIOK2/SRRM1/CCT6A/CETN3/NXT1/SLBP/NOP10/EIF4A3/SRSF2/KHDRBS1/RUVBL2/CCT8/…
GO:1901989	GO:1901989	positive regulation of cell cycle phase transition	81	-0.597944578036551	-2.07711576826479	5.43109906315867e-06	0.000171802695808558	0.000138424524238214	1696	tags=30%, list=12%, signal=26%	RAD51B/CDC25A/RAD51C/RPTOR/CDC23/CDC25B/TFDP1/PLRG1/ANXA1/STXBP4/KLHL18/NPM1/ATAD5/CDC7/FBXO5/EZH2/CDCA5/CCNB1/CDC6/DTL/CDC25C/CDK1/UBE2C/DLGAP5
GO:0034501	GO:0034501	protein localization to kinetochore	18	-0.843501057642532	-2.18051087626152	5.68273299658687e-06	0.000178705238822079	0.000143986027381012	693	tags=50%, list=5%, signal=48%	CENPQ/BUB3/ZWILCH/SPDL1/AURKB/NDC80/CDK1/TTK/KNL1
GO:0042769	GO:0042769	DNA damage response, detection of DNA damage	38	-0.710228401435818	-2.16364591016998	6.21003281924881e-06	0.000194145236559673	0.000156426311458086	999	tags=37%, list=7%, signal=34%	MRPS9/UBA52/RBX1/PCNA/POLD3/PARP1/RPS27A/RFC5/RPS3/RPA3/RFC2/RFC3/RFC4/DTL
GO:0045931	GO:0045931	positive regulation of mitotic cell cycle	92	-0.567258284566099	-2.01267965306275	6.27963896176002e-06	0.000195179941218425	0.000157259991624982	1716	tags=28%, list=12%, signal=25%	PRKCA/RAD51B/CDC25A/RAD51C/RPTOR/EIF4EBP1/CDC23/CDC25B/TFDP1/HES1/EIF4E/PLRG1/ANXA1/KLHL18/CDC7/FBXO5/ASNS/BRCA2/CDCA5/CCNB1/CDC6/DTL/CDC25C/CDK1/UBE2C/DLGAP5
GO:0032543	GO:0032543	mitochondrial translation	134	-0.514394502668155	-1.91719950124167	7.09248135237508e-06	0.000219169972889001	0.000176589191931359	3874	tags=56%, list=28%, signal=41%	MRPS26/SARS2/GADD45GIP1/QRSL1/MRPS5/GATC/MRPS24/LRPPRC/MRPL50/GATB/TACO1/MRPS10/NDUFA7/MRPL32/MRPL2/MTIF2/RMND1/GFM1/MRPL36/MRPL58/MRPS31/SHMT2/MRPL14/PTCD3/DAP3/GARS1/MRPS21/MRPL39/MRPL45/MRPS23/MRPL11/MRPL37/YARS2/MRPL20/MRPL17/MRPS35/FASTKD2/MRPS17/MRPL18/MRPS18C/MTRF1/NSUN3/MRPL21/UQCC2/MRPL30/MRPS18B/MRPL3/MRPL35/MRPS27/MRPL15/MRPL52/MRPS36/MRPS28/ERAL1/WARS2/MRPL51/MRPL47/MRPL33/MRPS9/MRPL4…
GO:0045229	GO:0045229	external encapsulating structure organization	257	0.401162350511377	1.70921647359981	7.1934396705189e-06	0.000221012232635598	0.000178073533767473	1832	tags=28%, list=13%, signal=24%	AGT/CTSK/FMOD/SULF2/TGFBI/DPP4/MMP11/ITGA10/MMP2/ITGB8/LOXL4/FBLN1/MMP3/ITGA11/LAMA1/BSG/COL8A2/TMEM38B/MFAP4/LAMB2/ANTXR1/HTRA1/BMP2/QSOX1/JAM2/RUNX1/CTSS/ITGB5/CSGALNACT1/SCUBE1/CST3/LAMA3/CTSL/CCN2/EFEMP2/ITGA3/LOX/SPP1/COLQ/COL12A1/FBLN2/ITGA4/TGFB1/CYP1B1/FAP/MMP12/GPM6B/COL6A1/CD47/TIMP1/DDR1/GAS6/FBLN5/COL14A1/GREM1/TTR/LUM/HSD17B12/RECK/TGFBR1/SCUBE3/ICAM1/ERO1A/LRP1/AGRN/PHLDB1/COL15A1/J…
GO:0030198	GO:0030198	extracellular matrix organization	256	0.401485244067676	1.70968024657321	7.3297137698068e-06	0.000222640055757882	0.000179385100155798	1832	tags=28%, list=13%, signal=25%	AGT/CTSK/FMOD/SULF2/TGFBI/DPP4/MMP11/ITGA10/MMP2/ITGB8/LOXL4/FBLN1/MMP3/ITGA11/LAMA1/BSG/COL8A2/TMEM38B/MFAP4/LAMB2/ANTXR1/HTRA1/BMP2/QSOX1/JAM2/RUNX1/CTSS/ITGB5/CSGALNACT1/SCUBE1/CST3/LAMA3/CTSL/CCN2/EFEMP2/ITGA3/LOX/SPP1/COLQ/COL12A1/FBLN2/ITGA4/TGFB1/CYP1B1/FAP/MMP12/GPM6B/COL6A1/CD47/TIMP1/DDR1/GAS6/FBLN5/COL14A1/GREM1/TTR/LUM/HSD17B12/RECK/TGFBR1/SCUBE3/ICAM1/ERO1A/LRP1/AGRN/PHLDB1/COL15A1/J…
GO:0043062	GO:0043062	extracellular structure organization	256	0.401485244067676	1.70968024657321	7.3297137698068e-06	0.000222640055757882	0.000179385100155798	1832	tags=28%, list=13%, signal=25%	AGT/CTSK/FMOD/SULF2/TGFBI/DPP4/MMP11/ITGA10/MMP2/ITGB8/LOXL4/FBLN1/MMP3/ITGA11/LAMA1/BSG/COL8A2/TMEM38B/MFAP4/LAMB2/ANTXR1/HTRA1/BMP2/QSOX1/JAM2/RUNX1/CTSS/ITGB5/CSGALNACT1/SCUBE1/CST3/LAMA3/CTSL/CCN2/EFEMP2/ITGA3/LOX/SPP1/COLQ/COL12A1/FBLN2/ITGA4/TGFB1/CYP1B1/FAP/MMP12/GPM6B/COL6A1/CD47/TIMP1/DDR1/GAS6/FBLN5/COL14A1/GREM1/TTR/LUM/HSD17B12/RECK/TGFBR1/SCUBE3/ICAM1/ERO1A/LRP1/AGRN/PHLDB1/COL15A1/J…
GO:0007131	GO:0007131	reciprocal meiotic recombination	39	-0.705618262091706	-2.16145292612458	7.53832077867569e-06	0.000226403724060675	0.000182417555448497	2371	tags=51%, list=17%, signal=43%	RAD21/CNTD1/CENPS/HSF2BP/RAD51B/RAD51C/MLH1/CENPX/FANCM/RAD54B/EME1/RMI1/PSMC3IP/RAD51/FANCD2/BRIP1/TRIP13/RAD51AP1/RAD54L/TOP2A
GO:0140527	GO:0140527	reciprocal homologous recombination	39	-0.705618262091706	-2.16145292612458	7.53832077867569e-06	0.000226403724060675	0.000182417555448497	2371	tags=51%, list=17%, signal=43%	RAD21/CNTD1/CENPS/HSF2BP/RAD51B/RAD51C/MLH1/CENPX/FANCM/RAD54B/EME1/RMI1/PSMC3IP/RAD51/FANCD2/BRIP1/TRIP13/RAD51AP1/RAD54L/TOP2A
GO:0036297	GO:0036297	interstrand cross-link repair	51	-0.643881212057841	-2.0599039568047	7.62349954453643e-06	0.000227682841145764	0.000183448163106398	2155	tags=43%, list=15%, signal=37%	CENPS/UBB/MCM8/FANCC/FANCL/NUCKS1/DCLRE1C/FANCE/CENPX/FANCM/UBA52/FANCA/RPS27A/RPA3/EME1/FANCB/FANCI/RAD51/NEIL3/FANCD2/UBE2T/RAD51AP1
GO:0006301	GO:0006301	postreplication repair	48	-0.669308094949699	-2.10170439177771	8.02005896947275e-06	0.000238195751393341	0.000191918604111594	879	tags=33%, list=6%, signal=31%	UBE2N/UBE2V2/UBA52/PCNA/POLD3/RPS27A/WDR33/RFC5/RPA3/RFC2/BRCA1/RFC3/RFC4/POLE2/DTL/PCLAF
GO:0031055	GO:0031055	chromatin remodeling at centromere	38	-0.706413966373609	-2.15202558239194	8.21319581369145e-06	0.000242584225524832	0.000195454476706167	2234	tags=61%, list=16%, signal=51%	CENPL/RBBP7/OIP5/CENPS/H3-3B/RBBP4/NASP/HELLS/CENPX/CENPO/CENPQ/ITGB3BP/NPM1/CENPW/CENPA/H4C3/CENPM/CENPI/CENPU/CENPK/HJURP/CENPN/KNL1
GO:0140053	GO:0140053	mitochondrial gene expression	165	-0.475145950219065	-1.8411134341651	9.4734701920675e-06	0.000278270173883477	0.000224207287599423	3760	tags=50%, list=27%, signal=37%	GADD45GIP1/QRSL1/MRPS5/GATC/MRPS24/LRPPRC/MRPL50/GATB/TACO1/MRPS10/NDUFA7/MRPL32/MRPL2/MTIF2/RMND1/TFB1M/GFM1/MRPL36/MRPL58/MRPS31/SHMT2/MRPL14/PTCD3/TEFM/DAP3/GARS1/MRPS21/MRPL39/MRPL45/MRPS23/MRPL11/PRORP/MRPL37/YARS2/MRPL20/MRPL17/PNPT1/MRPS35/FASTKD2/MRPS17/MRPL18/MTO1/MRPS18C/MTRF1/NSUN3/MRPL21/UQCC2/MRPL30/MRPS18B/MRPL3/MRPL35/MRPS27/MRPL15/PRKAA1/MRPL52/MRPS36/MRPS28/TRMT10A/ERAL1/SLC25A33…
GO:0055065	GO:0055065	metal ion homeostasis	368	0.36285052097271	1.59689394994336	1.01705974756882e-05	0.000297114831175024	0.000239390767158564	2230	tags=22%, list=16%, signal=19%	CCL7/AGT/FAM20A/SLC40A1/CD36/STC1/KCNJ2/TMEM178A/MT2A/CXCR6/FTH1/SLC30A1/ISCU/ATP2A2/PRNP/PTGER3/TRPV1/TMEM38B/PTGIR/CYBRD1/EPAS1/GRIA1/SLC31A2/ACKR4/PACS2/SLC12A7/PRKN/TPCN1/TGM2/FYN/CD55/GPR18/TRPV2/CACNA1C/HEXB/WFS1/SLC9A1/ATP6AP1/ATP6V1A/PLCG2/ADM/MLLT6/GPER1/P2RX4/PML/STEAP2/CEMIP/FTL/C1QTNF1/MT1X/F2RL2/HYAL2/ACO1/SLC1A1/P2RX7/SLC25A28/AKAP6/CDK5/STEAP1/F2R/TRPC1/ERO1A/LRP1/ATP1B3/PDGFRA/RAS…
GO:0008015	GO:0008015	blood circulation	293	0.384915065774617	1.66111588490844	1.02284885313173e-05	0.000297182063524033	0.000239444937472256	1879	tags=24%, list=13%, signal=21%	AGT/KCNH6/FGF13/PDE4B/SUCNR1/STC1/RARRES2/KCNJ2/RGS4/RGS2/MYL3/SOD2/REN/ANGPT1/ATP2A2/SERPING1/TMEM38B/TNNT2/EPAS1/ACTC1/NISCH/GSN/AGTRAP/TNNI3K/ATP6AP2/CCN2/SCPEP1/CACNA1C/HSPB7/STAT1/TGFB1/SLC9A1/KCNJ14/NOS1AP/ADM/SGK1/NPR2/GPER1/P2RX4/CHRM3/KCND2/MEF2A/GAS6/PRCP/THRA/GPX1/MME/KCNMB2/BBS2/ECE1/SLC1A1/ID2/MECP2/DLL4/DSP/MKKS/EHD3/ADCY6/GCLC/F2R/TRPC1/CACNB4/ICAM1/SMAD7/TJP2/ATP1B3/CTNNBIP1/GAA/K…
GO:0006275	GO:0006275	regulation of DNA replication	96	-0.563727816575828	-2.00696278200287	1.06895559114584e-05	0.000308899275149496	0.000248885705773473	2303	tags=36%, list=16%, signal=31%	PPP2CA/NBN/SLFN11/DONSON/DBF4B/CHEK2/NPM2/NUCKS1/ZMPSTE24/TP53/GTPBP4/BLM/INO80/PCNA/TIMELESS/CACYBP/LIG3/RFC5/CDC42/ATAD5/CHTF18/ZRANB3/GMNN/DNA2/RFC2/RFC3/RFC4/CDC7/FBXO5/E2F7/EGF/BRCA2/CCNA2/CDC6/ESCO2
GO:0016572	GO:0016572	histone phosphorylation	37	-0.715496511988982	-2.16392719761537	1.09293216515285e-05	0.000314129857790707	0.000253100080351187	1753	tags=41%, list=13%, signal=36%	RPS6KA4/PRKCA/TWIST1/ZMPSTE24/PRKAA1/HASPIN/CDK2/CHEK1/VRK1/MAP3K12/AURKA/CCNA2/CCNB1/AURKB/CDK1
GO:0051302	GO:0051302	regulation of cell division	116	-0.527446991673223	-1.93595848468198	1.11034880859804e-05	0.000317429129987441	0.000255758363342707	811	tags=23%, list=6%, signal=22%	CALM3/PKP4/PTN/BLM/CDC25B/CIT/RACK1/CALM2/MYO19/CDC42/ORC6/FGF1/RBL1/KIF23/KIF20B/RACGAP1/E2F7/AURKA/BRCA2/KIF18B/CDC6/PLK1/PRC1/PLK4/AURKB/KIF14/KIF20A
GO:0006336	GO:0006336	DNA replication-independent nucleosome assembly	43	-0.688218218917407	-2.11883755730237	1.18605440918427e-05	0.000337268450611656	0.000271743261051627	2234	tags=56%, list=16%, signal=47%	CENPL/RBBP7/OIP5/CENPS/H3-3B/IPO4/RBBP4/NASP/HAT1/CENPX/CENPO/CENPQ/ITGB3BP/NPM1/CENPW/CENPA/H4C3/CENPM/CENPI/CENPU/CENPK/HJURP/CENPN/KNL1
GO:0051382	GO:0051382	kinetochore assembly	16	-0.841276470263513	-2.09815200921827	1.32809931668442e-05	0.000375662378147878	0.000302677939508362	269	tags=50%, list=2%, signal=49%	CENPX/CENPW/CENPA/CENPE/CENPK/CENPN/CENPF/DLGAP5
GO:0034080	GO:0034080	CENP-A containing nucleosome assembly	34	-0.725254276581418	-2.15518872383163	1.37508143587418e-05	0.000384878814459862	0.000310103788128804	717	tags=62%, list=5%, signal=59%	CENPL/RBBP7/OIP5/CENPS/RBBP4/NASP/CENPX/CENPO/CENPQ/ITGB3BP/NPM1/CENPW/CENPA/H4C3/CENPM/CENPI/CENPU/CENPK/HJURP/CENPN/KNL1
GO:0061641	GO:0061641	CENP-A containing chromatin organization	34	-0.725254276581418	-2.15518872383163	1.37508143587418e-05	0.000384878814459862	0.000310103788128804	717	tags=62%, list=5%, signal=59%	CENPL/RBBP7/OIP5/CENPS/RBBP4/NASP/CENPX/CENPO/CENPQ/ITGB3BP/NPM1/CENPW/CENPA/H4C3/CENPM/CENPI/CENPU/CENPK/HJURP/CENPN/KNL1
GO:0043161	GO:0043161	proteasome-mediated ubiquitin-dependent protein catabolic process	384	-0.39044767996992	-1.64560441763437	1.41895153235985e-05	0.000395089317291447	0.000318330574035994	2512	tags=24%, list=18%, signal=20%	GLMN/FAF1/SMURF2/USP14/UBXN11/FBXO48/ERLIN1/PCNP/FBXW8/DVL1/XPO1/CDC26/HSPA5/PSMA7/RAD23B/PSMD10/UBB/PSMD3/FBXO45/ERCC8/HECW1/FOXF2/PSMC5/PSMC6/UBXN8/SUMO2/UFD1/PSME3/ANAPC1/PSMB4/PSMA1/PSME2/EIF3H/PSMB6/DNAJC18/PSMA2/BTRC/SUMO1/PSMD14/COMMD1/PSMD11/SMARCC1/CDC23/TAF9/PSMA6/DERL2/PSMA3/ARIH1/PSMB5/PSMB3/ERLIN2/PSMC2/DDA1/PSMB7/PPP2R5C/PSMC1/UBE2V2/UBA52/RPL11/NEDD4L/RACK1/RBX1/PSMB1/TBL1XR1/PSMB9…
GO:0070126	GO:0070126	mitochondrial translational termination	89	-0.575451250529751	-2.02676725208535	1.43393884358073e-05	0.000397193629936921	0.000320026056609345	3009	tags=53%, list=21%, signal=42%	MRPL36/MRPL58/MRPS31/MRPL14/PTCD3/DAP3/MRPS21/MRPL39/MRPL45/MRPS23/MRPL11/MRPL37/MRPL20/MRPL17/MRPS35/MRPS17/MRPL18/MRPS18C/MTRF1/MRPL21/MRPL30/MRPS18B/MRPL3/MRPL35/MRPS27/MRPL15/MRPL52/MRPS36/MRPS28/ERAL1/MRPL51/MRPL47/MRPL33/MRPS9/MRPL4/MRPL13/MRPL42/MRPL22/MRPL40/MRPL1/MRPS22/MRPL24/MRPL27/MRPL48/MRPS33/MRPS14/MRRF
GO:0034724	GO:0034724	DNA replication-independent nucleosome organization	44	-0.68849007240499	-2.12590665363952	1.4591510676128e-05	0.000402093897291652	0.000323974290215496	2254	tags=57%, list=16%, signal=48%	SUPT16H/CENPL/RBBP7/OIP5/CENPS/H3-3B/IPO4/RBBP4/NASP/HAT1/CENPX/CENPO/CENPQ/ITGB3BP/NPM1/CENPW/CENPA/H4C3/CENPM/CENPI/CENPU/CENPK/HJURP/CENPN/KNL1
GO:0051653	GO:0051653	spindle localization	41	-0.688550319354836	-2.10662329125099	1.47307426482285e-05	0.000403848975371433	0.0003253883882135	1569	tags=34%, list=11%, signal=30%	KPNB1/ACTR2/PAFAH1B1/DYNLT1/GPSM2/MYH9/CFL1/CENPA/MAD2L1/SPDL1/PLK1/NUSAP1/NDC80/ASPM
GO:0060047	GO:0060047	heart contraction	155	0.453610373416691	1.7947688794199	1.6393185922301e-05	0.000447132509901129	0.000360262711031449	1839	tags=25%, list=13%, signal=22%	AGT/KCNH6/FGF13/PDE4B/STC1/KCNJ2/RGS4/RGS2/MYL3/ATP2A2/TMEM38B/TNNT2/EPAS1/ACTC1/GSN/TNNI3K/CCN2/CACNA1C/HSPB7/SLC9A1/KCNJ14/NOS1AP/ADM/NPR2/P2RX4/KCND2/MEF2A/THRA/GPX1/SLC1A1/DSP/EHD3/TRPC1/CACNB4/SMAD7/ATP1B3/GAA/KCNJ3/POPDC2
GO:0007076	GO:0007076	mitotic chromosome condensation	15	-0.855692399845933	-2.11392334871554	1.67162315293229e-05	0.000453629308404874	0.000365497298519846	619	tags=33%, list=4%, signal=32%	SMC4/CDCA5/NCAPG/NUSAP1/NCAPH
GO:0003014	GO:0003014	renal system process	66	0.575021712369884	2.02065853669616	1.94651043541672e-05	0.000525557817562515	0.000423451392967849	1608	tags=33%, list=11%, signal=30%	AGT/SULF2/SUCNR1/STC1/KLHL3/AKR1B1/ADCY4/LGMN/REN/JCHAIN/GSN/ITGA3/WFS1/ADM/SGK1/MLLT6/GAS6/BMP4/HYAL2/ADCY6/RAB11FIP2/F2R
GO:0061418	GO:0061418	regulation of transcription from RNA polymerase II promoter in response to hypoxia	71	-0.579895950970568	-1.95490284501888	2.01505858130335e-05	0.000541331817871745	0.000436160788928501	2183	tags=48%, list=16%, signal=41%	PSMA7/HIGD1A/PSMD10/UBB/PSMD3/PSMC5/CREBBP/PSMC6/PSME3/PSMB4/PSMA1/PSME2/PSMB6/PSMA2/TP53/CITED2/PSMD14/PSMD11/PSMA6/PSMA3/PSMB5/PSMB3/PSMC2/PSMB7/HIF3A/PSMC1/UBA52/RBX1/PSMB1/PSMB9/PSMA5/PSMB2/RPS27A/PSMA4
GO:0006338	GO:0006338	chromatin remodeling	163	-0.478561890268769	-1.84790583885313	2.37771060939598e-05	0.000635562045891546	0.000512083779665703	2234	tags=28%, list=16%, signal=23%	CENPL/RBBP7/OIP5/CENPS/KDM4C/SMARCB1/TADA2A/H3-3B/SUV39H1/NPM2/RBBP4/DAXX/NASP/NUDT5/RUVBL2/SMARCC1/HELLS/ACTR6/ACTL6A/HDAC1/SMARCE1/KDM5C/CENPX/INO80/TET1/CHD1L/CENPO/ACTB/DNMT1/CENPQ/MYB/ITGB3BP/NPM1/SUV39H2/CENPW/CENPA/ANP32E/H4C3/CENPM/CENPI/CENPU/CENPK/HJURP/CENPN/KNL1
GO:0090305	GO:0090305	nucleic acid phosphodiester bond hydrolysis	253	-0.413374793091832	-1.6730441673448	2.4706192475881e-05	0.000652088012220314	0.000525399048182709	2731	tags=29%, list=19%, signal=24%	TDP1/RFC1/APEX1/POLR3K/RRP36/RPP14/CPSF3/PNRC2/RBBP8/NOL9/POLR1H/UTP20/KHNYN/CNOT6/PRORP/UBB/IHO1/GTF2H5/DIS3L2/PNPT1/NCBP1/EXOSC7/CNOT2/TSEN15/ZFP36/KPNA1/MGME1/KPNB1/TSNAX/DCP1A/RAD9B/HMGB1/DCLRE1C/TATDN1/POP5/DFFA/TSN/BMS1/FANCM/UBA52/GTF2H2/CHD1L/OGG1/SLFN13/DDX1/RBX1/CPSF6/PCNA/POLD3/RPS21/EXD3/PARP1/RPS27A/RPP30/RFC5/EXOSC2/EXOSC8/RPA3/GTF2H3/EME1/EXOSC9/CSTF3/ZRANB3/POP1/RNASEH2A/DNA2/RFC2…
GO:0010742	GO:0010742	macrophage derived foam cell differentiation	23	0.748408925060895	2.10633334739753	2.47612918968806e-05	0.000652088012220314	0.000525399048182709	782	tags=30%, list=6%, signal=29%	AGT/CD36/CSF1/APOB/MSR1/STAT1/TGFB1
GO:0090077	GO:0090077	foam cell differentiation	23	0.748408925060895	2.10633334739753	2.47612918968806e-05	0.000652088012220314	0.000525399048182709	782	tags=30%, list=6%, signal=29%	AGT/CD36/CSF1/APOB/MSR1/STAT1/TGFB1
GO:0043486	GO:0043486	histone exchange	44	-0.679695138253645	-2.098749821929	2.53705952145701e-05	0.000664858833417117	0.000535688728679158	717	tags=52%, list=5%, signal=50%	CENPL/RBBP7/OIP5/CENPS/RBBP4/NASP/ACTR6/CENPX/CENPO/CENPQ/ITGB3BP/NPM1/CENPW/CENPA/ANP32E/H4C3/CENPM/CENPI/CENPU/CENPK/HJURP/CENPN/KNL1
GO:1903522	GO:1903522	regulation of blood circulation	156	0.447885274582626	1.77456099893332	2.57492040218473e-05	0.000671488998540465	0.000541030772053396	1839	tags=26%, list=13%, signal=23%	AGT/KCNH6/FGF13/PDE4B/STC1/KCNJ2/RGS4/RGS2/MYL3/ATP2A2/TMEM38B/TNNT2/EPAS1/TNNI3K/CCN2/CACNA1C/HSPB7/SLC9A1/KCNJ14/NOS1AP/ADM/NPR2/P2RX4/CHRM3/KCND2/MEF2A/THRA/KCNMB2/ECE1/SLC1A1/DSP/EHD3/F2R/TRPC1/CACNB4/ICAM1/SMAD7/ATP1B3/GAA/KCNJ3/POPDC2
GO:0030397	GO:0030397	membrane disassembly	15	-0.850434490403724	-2.10093408115009	2.7146980240239e-05	0.00070110027229139	0.000564889108278963	223	tags=33%, list=2%, signal=33%	VRK1/CCNB1/PLK1/CCNB2/CDK1
GO:0051081	GO:0051081	nuclear envelope disassembly	15	-0.850434490403724	-2.10093408115009	2.7146980240239e-05	0.00070110027229139	0.000564889108278963	223	tags=33%, list=2%, signal=33%	VRK1/CCNB1/PLK1/CCNB2/CDK1
GO:1901992	GO:1901992	positive regulation of mitotic cell cycle phase transition	70	-0.592793016332773	-2.00577924146339	2.82644296494517e-05	0.000726450196663311	0.000585313998611115	1696	tags=29%, list=12%, signal=25%	RAD51B/CDC25A/RAD51C/RPTOR/CDC23/CDC25B/TFDP1/PLRG1/ANXA1/KLHL18/CDC7/FBXO5/CDCA5/CCNB1/CDC6/DTL/CDC25C/CDK1/UBE2C/DLGAP5
GO:0006289	GO:0006289	nucleotide-excision repair	103	-0.531365081031915	-1.92478861122572	2.87019687824937e-05	0.00073416614885747	0.000591530880171061	3681	tags=52%, list=26%, signal=39%	POLR2F/MNAT1/ERCC2/GTF2H1/SLX4/POLR2A/POLR2K/SLC30A9/POLR2I/ATXN3/POLR2D/KAT7/POLR2C/MMS19/CCNH/PPIE/USP45/RFC1/ISY1/CDK7/HUS1/XAB2/RAD23B/UBB/GTF2H5/ERCC8/FANCC/COPS5/POLR2G/COPS6/TP53/COMMD1/HMGB1/COPS4/UBA52/GTF2H2/CHD1L/OGG1/COPS3/RBX1/PCNA/POLR2H/POLD3/PARP1/RPS27A/LIG3/RFC5/RPA3/GTF2H3/RFC2/RFC3/RFC4/BRIP1/BRCA2
GO:0048871	GO:0048871	multicellular organismal homeostasis	310	0.369224124479921	1.59066047067217	2.97503739548853e-05	0.000757359519822938	0.000610218196608475	2001	tags=23%, list=14%, signal=20%	SLC40A1/CD36/PDK4/PTGES/LEPR/CSF1/AKR1B1/ADCY4/CTSH/CYP26B1/ANGPT1/PTGER3/ADGRV1/JCHAIN/FABP4/EPAS1/PIWIL4/JAM2/SIGLEC15/CCN2/CRB1/TRPV2/WFS1/SPP1/AMPD2/SMO/ATP6AP1/CEBPB/TPP1/GRHL1/P2RX4/SLC2A1/TSKU/TLR4/PRCP/THRA/DIO2/GPX1/GPR137B/ACOT13/HYAL2/BBS2/SLC1A1/SLC27A1/ADD1/P2RX7/PRKAB1/ZNF516/NANOS1/MKKS/ADCY6/BSCL2/ACACB/RAB11FIP2/LRRK1/F2R/DRAM2/TJP2/GCNT2/PRKAA2/JAM3/IL6/YAP1/ACVR2B/CLDN1/SGIP1/N…
GO:0090329	GO:0090329	regulation of DNA-dependent DNA replication	43	-0.675371809479601	-2.07928694087707	2.99120784235325e-05	0.000757867162332723	0.000610627213315515	2244	tags=51%, list=16%, signal=43%	NBN/SLFN11/DONSON/DBF4B/CHEK2/ZMPSTE24/BLM/INO80/PCNA/TIMELESS/LIG3/RFC5/CHTF18/ZRANB3/GMNN/RFC2/RFC3/RFC4/CDC7/FBXO5/E2F7/BRCA2
GO:0050729	GO:0050729	positive regulation of inflammatory response	68	0.569782403080336	2.01906223627202	3.03712108492129e-05	0.000765870250942888	0.000617075445853919	1225	tags=26%, list=9%, signal=24%	AGT/SUCNR1/NEAT1/NUPR1/HLA-E/LRRK2/PTGER3/FABP4/TGM2/MAPK13/GRN/CD81/GPRC5B/CEBPB/CD47/TLR4/PDCD4/HYAL2
GO:0033683	GO:0033683	nucleotide-excision repair, DNA incision	37	-0.69659852926465	-2.10677267888324	3.31780477611745e-05	0.000832722269160747	0.000670939320181498	873	tags=41%, list=6%, signal=38%	UBA52/GTF2H2/CHD1L/OGG1/RBX1/PCNA/POLD3/PARP1/RPS27A/RFC5/RPA3/GTF2H3/RFC2/RFC3/RFC4
GO:0070125	GO:0070125	mitochondrial translational elongation	88	-0.554251696575913	-1.94873287774819	3.61595196484584e-05	0.000903312112339526	0.000727814827356083	3760	tags=60%, list=27%, signal=44%	GADD45GIP1/MRPS5/MRPS24/MRPL50/MRPS10/MRPL32/MRPL2/GFM1/MRPL36/MRPL58/MRPS31/MRPL14/PTCD3/DAP3/MRPS21/MRPL39/MRPL45/MRPS23/MRPL11/MRPL37/MRPL20/MRPL17/MRPS35/MRPS17/MRPL18/MRPS18C/MRPL21/MRPL30/MRPS18B/MRPL3/MRPL35/MRPS27/MRPL15/MRPL52/MRPS36/MRPS28/ERAL1/MRPL51/MRPL47/MRPL33/MRPS9/MRPL4/MRPL13/MRPL42/MRPL22/MRPL40/MRPL1/MRPS22/MRPL24/MRPL27/MRPL48/MRPS33/MRPS14
GO:0015711	GO:0015711	organic anion transport	201	0.417123523921843	1.71570683970468	3.99811372614417e-05	0.000994135626975197	0.000800992967803278	1480	tags=20%, list=11%, signal=18%	CD36/SLC1A2/LRP2/PPFIA4/PTGES/SLC16A6/FOLR3/RGS4/SLC4A11/RGS2/PLA2G4A/CA12/ABCC3/PSAP/PLA2R1/SLC3A2/CYB5R1/CTNS/SLC17A5/SLC6A8/AKR1C1/SLCO2A1/P2RX4/SLC2A1/CD47/SLC38A6/SLC25A4/SLC25A30/SLC47A1/SLC16A12/GLS/SLC1A1/SLC27A1/SLC38A2/STARD5/SLC6A6/SNAP25/SLC7A11/SLC33A1/SLC25A19
GO:0000083	GO:0000083	regulation of transcription involved in G1/S transition of mitotic cell cycle	29	-0.734187302751333	-2.11809956820073	4.55355306490894e-05	0.00112700438356496	0.000908047716452601	950	tags=38%, list=7%, signal=35%	TFDP1/PCNA/CDK15/FBXO5/TYMS/E2F7/DHFR/CDC6/ORC1/CDC45/RRM2
GO:1904666	GO:1904666	regulation of ubiquitin protein ligase activity	23	-0.766249019321534	-2.09935224365329	4.58891068125147e-05	0.00113052149778665	0.000910881518684503	1426	tags=48%, list=10%, signal=43%	BTRC/RPL5/RPL11/RPL23/RPS7/UBE2S/FBXO5/MAD2L1/PLK1/CDC20/UBE2C
GO:0032506	GO:0032506	cytokinetic process	35	-0.695068743897635	-2.06119958964304	4.72107273325303e-05	0.00115774563449407	0.00093281649562875	186	tags=20%, list=1%, signal=20%	MYH9/KIF20B/RACGAP1/AURKB/CEP55/ANLN/KIF20A
GO:0000077	GO:0000077	DNA damage checkpoint	137	-0.483522258420265	-1.81741512562498	4.85396548347055e-05	0.00118489951938966	0.000954694869423769	2244	tags=30%, list=16%, signal=25%	NBN/RHNO1/TRIAP1/CNOT6/DONSON/CDC5L/MSH2/CHEK2/ATF2/MDM4/CNOT9/CNOT2/PCBP4/TP53/TOPBP1/TIPRL/RAD9B/PRMT1/RPL26/BLM/TFDP1/PCNA/CDK2/CASP2/INTS7/EME1/DDX39B/CHEK1/BRCA1/WDR76/FANCD2/BRIP1/E2F7/AURKA/CCNB1/PLK1/GTSE1/DTL/CLSPN/CDC25C/CDK1
GO:0070192	GO:0070192	chromosome organization involved in meiotic cell cycle	38	-0.677342969225019	-2.06346344666496	4.98974062473533e-05	0.00121250697181069	0.000976938690737654	1770	tags=42%, list=13%, signal=37%	SMC2/NDC1/RAD51C/P3H4/MLH1/SMC4/AGO4/RAD51/SGO2/FANCD2/BRIP1/TRIP13/CCNE2/BUB1B/SGO1/BUB1
GO:0030216	GO:0030216	keratinocyte differentiation	98	0.501936285182868	1.88046614121734	5.3971800836309e-05	0.00130558030439325	0.00105192954999846	1665	tags=24%, list=12%, signal=22%	PCSK6/CTSK/KRTAP3-3/EREG/KRT33B/KRT38/ASAH1/CYP26B1/KRT23/KRTAP1-5/EXPH5/PERP/RUNX1/CTSL/KRT40/KRTAP3-1/GRHL1/BCR/VDR/NCOA3/ERRFI1/DSP/CD109/SHARPIN
GO:0030261	GO:0030261	chromosome condensation	33	-0.70615444063453	-2.08539490316708	5.60758476005244e-05	0.00135036703275857	0.00108801502314531	619	tags=24%, list=4%, signal=23%	SMC4/NCAPG2/CDCA5/CCNB1/NCAPG/NUSAP1/TOP2A/NCAPH
GO:0006296	GO:0006296	nucleotide-excision repair, DNA incision, 5'-to lesion	35	-0.692053565719662	-2.05225819488503	5.73620335871651e-05	0.00137514543299096	0.00110797942619155	873	tags=40%, list=6%, signal=38%	UBA52/GTF2H2/CHD1L/RBX1/PCNA/POLD3/PARP1/RPS27A/RFC5/RPA3/GTF2H3/RFC2/RFC3/RFC4
GO:0019985	GO:0019985	translesion synthesis	38	-0.674729333544486	-2.05550124445026	6.03830795231143e-05	0.00144110688897575	0.00116112575849898	873	tags=32%, list=6%, signal=30%	UBA52/PCNA/POLD3/RPS27A/RFC5/RPA3/RFC2/RFC3/RFC4/POLE2/DTL/PCLAF
GO:0050684	GO:0050684	regulation of mRNA processing	124	-0.488596898339935	-1.80121113247316	6.37277775930169e-05	0.00150101089021672	0.00120939149049301	3722	tags=46%, list=27%, signal=34%	DHX9/SNRNP70/FXR1/VIRMA/SFSWAP/SUPT6H/RBM24/SRSF6/SRSF4/PTCD2/CDC73/QKI/LARP7/TIA1/SRSF9/PTBP1/SRPK1/SNW1/SAP18/SLTM/CWC22/HNRNPU/PABPN1/SRSF10/SNRPA/RBM4/DAZAP1/THRAP3/NCBP1/RBM23/SMU1/TRA2A/PCBP4/KHDRBS1/LEO1/SF3B4/HNRNPL/RBFOX2/PRDX6/RBM8A/RBMX/RBM25/C1QBP/CPSF6/RBMXL1/HNRNPA2B1/HSPA8/SRSF3/RBM7/NCL/MAGOH/SRSF7/HNRNPA1/TRA2B/RBM3/BARD1/CCNB1
GO:1990542	GO:1990542	mitochondrial transmembrane transport	97	-0.523935323641548	-1.87118479444103	6.37277775930169e-05	0.00150101089021672	0.00120939149049301	2865	tags=44%, list=20%, signal=36%	SLC25A51/ROMO1/GRPEL2/ATPSCKMT/VDAC1/STOML2/GRPEL1/CPT1A/TIMM23B/ATP5PD/TIMM44/ATP5PF/MAIP1/MPC1/ATP5MF/MCUB/PNPT1/ATP5F1D/SLC25A1/MRPL18/ATP5MC3/ATP5F1E/SFXN1/CHCHD4/TIMM21/SLC25A33/SLC25A12/ATP5MC2/SFXN5/ATP5F1C/SLC25A5/ATP5PB/ATP5ME/HSPD1/TIMM17A/ATP5F1A/ATP5MG/DNAJC15/SLC25A21/ATP5MC1/SLC25A15/ATP5PO/SFXN2
GO:0046942	GO:0046942	carboxylic acid transport	147	0.437355150224399	1.72403560559374	6.37354044293297e-05	0.00150101089021672	0.00120939149049301	1458	tags=22%, list=10%, signal=20%	CD36/SLC1A2/LRP2/PPFIA4/PTGES/SLC16A6/FOLR3/RGS4/RGS2/PLA2G4A/ABCC3/PSAP/PLA2R1/SLC3A2/CTNS/SLC17A5/SLC6A8/AKR1C1/SLCO2A1/P2RX4/SLC38A6/SLC25A30/SLC47A1/SLC16A12/GLS/SLC1A1/SLC27A1/SLC38A2/STARD5/SLC6A6/SNAP25/SLC7A11
GO:0000079	GO:0000079	regulation of cyclin-dependent protein serine/threonine kinase activity	85	-0.551067627380037	-1.91416202880239	6.42234078966887e-05	0.0015058699062092	0.00121330648713412	335	tags=16%, list=2%, signal=16%	CKS2/MYOCD/CCNF/CDKN2C/CKS1B/PSRC1/CDKN3/CCNA2/CCNB1/CDC6/CCNE2/PLK1/CDC25C/CCNB2
GO:0043487	GO:0043487	regulation of RNA stability	169	-0.454445295981265	-1.75798774144416	6.56738587355471e-05	0.0015331547982543	0.00123529041574745	3722	tags=46%, list=27%, signal=34%	DHX9/MYD88/ANP32A/FXR1/PSME4/PSMC4/LARP1/AKT1/EXOSC6/RBM24/TENT5C/HNRNPA0/PSME1/LARP4B/HSPB1/RC3H1/METTL14/HNRNPC/RC3H2/EIF4G1/APEX1/FTO/YBX1/XPO1/HNRNPU/PSMA7/PSMD10/UBB/PSMD3/THRAP3/SERBP1/PSMC5/EXOSC7/PSMC6/FASTKD2/TARDBP/PRKCA/PSME3/SET/ZFP36/PSMB4/YWHAZ/PSMA1/PSME2/PSMB6/VIM/PSMA2/PCBP4/DCP1A/PSMD14/PSMD11/PSMA6/PSMA3/PSMB5/PSMB3/PSMC2/PSMB7/PSMC1/ELAVL1/UBA52/DKC1/PSMB1/TRDMT1/PSMB9/PSMA5/H…
GO:0006405	GO:0006405	RNA export from nucleus	131	-0.49203339166017	-1.82420262314683	6.73982464931335e-05	0.00156656967718388	0.00126221338512541	3625	tags=48%, list=26%, signal=36%	POLDIP3/AGFG1/XPO5/SUPT6H/NUP153/SRSF6/NOL6/NUP107/GLE1/NUP205/SRSF4/POLR2D/NMD3/CHTOP/SRSF9/SSB/UPF3B/CPSF3/ALYREF/XPO1/DDX19B/NUP93/RAE1/PABPN1/NUP88/TSC1/FYTTD1/NUP85/NCBP1/XPOT/SEH1L/PHAX/NDC1/RIOK2/SRRM1/NXT1/SLBP/EIF4A3/SRSF2/KHDRBS1/NUP155/NUP35/SARNP/NUP37/ENY2/EIF4E/ABCE1/RBM8A/MAGOHB/THOC7/CPSF6/HNRNPA2B1/EIF6/SRSF3/RAN/WDR33/MAGOH/SRSF7/NPM1/HNRNPA1/DDX39A/SRSF1/DDX39B
GO:1904029	GO:1904029	regulation of cyclin-dependent protein kinase activity	87	-0.543214437381858	-1.89998809475736	6.78956505262932e-05	0.00157129934075136	0.00126602416018953	701	tags=18%, list=5%, signal=18%	ACTB/HSP90AB1/CKS2/MYOCD/CCNF/CDKN2C/CKS1B/PSRC1/CDKN3/CCNA2/CCNB1/CDC6/CCNE2/PLK1/CDC25C/CCNB2
GO:0009913	GO:0009913	epidermal cell differentiation	130	0.451015009187102	1.76897689085741	7.11401703059952e-05	0.00163929030368901	0.00132080570277737	1829	tags=25%, list=13%, signal=22%	PCSK6/CTSK/KRTAP3-3/EREG/SFRP4/KRT33B/KRT38/ASAH1/CYP26B1/KRT23/KRTAP1-5/TMC1/EXPH5/PERP/RUNX1/GATA6/CTSL/KRT40/KRTAP3-1/MAFF/GRHL1/BCR/VDR/BMP4/TRIOBP/NCOA3/ERRFI1/DSP/CD109/SHARPIN/MYO6/YAP1
GO:0006954	GO:0006954	inflammatory response	392	0.342750628621679	1.51612549272339	7.31372940885864e-05	0.0016780771424789	0.00135205695690307	1780	tags=20%, list=13%, signal=18%	CHI3L1/CCL7/AGT/CD36/CD14/PTGES/SUCNR1/RARRES2/CSF1/LAT/NEAT1/NUPR1/HDAC9/CXCR6/CHST2/MMP3/CYP26B1/CCL2/NFATC4/WDR83/HLA-E/LRRK2/PTGER3/FABP4/PLA2G4C/APOD/PTGIR/BMP2/AFAP1L2/FNDC4/SCG2/TGM2/SCUBE1/MAPK13/GRN/CAMK1D/CASP12/IGFBP4/CCN3/CD81/SPP1/TGFB1/IKBKB/BMPR1B/NLRP2/GPRC5B/CD68/TNIP2/CHID1/CEBPB/ADM/GPER1/LY96/CD47/SDC1/TLR4/TIMP1/PRCP/IL17RA/GPX1/PDCD4/PLD3/HYAL2/BAP1/THEMIS2/CYLD/MAPK7/C4B/F2…
GO:0010817	GO:0010817	regulation of hormone levels	289	0.368500092046907	1.59051734448783	7.40337576346663e-05	0.00169138661673045	0.00136278063986079	1667	tags=20%, list=12%, signal=18%	AGT/PCSK6/CTSK/DPP4/ACVR1C/PCSK1/AKR1B1/RDH10/CYP26B1/REN/CACNA1E/AKR1B10/DHRS3/PFKFB2/ANO1/BMP2/ARL2/PRKN/ATP6AP2/CTSL/TIPARP/SCPEP1/SYT7/CACNA1C/CCN3/SPP1/CYP1B1/SCG5/ADM/DHCR7/AKR1C1/GPER1/SLC2A1/SFRP1/GPLD1/SLC25A4/C1QTNF1/SELENOM/RETSAT/DIO2/MME/SYTL4/DKK3/ECE1/SIRT3/PLEKHA1/SOX4/TTR/HSD17B12/SLC9B2/CPQ/GCNT4/SNAP25/HSD17B2/RAB11FIP2/NADK/BACE2/AKR1C2/LRP1
GO:0061448	GO:0061448	connective tissue development	166	0.426708162506036	1.70417361306883	7.53172126183438e-05	0.00171338646237305	0.00138050631146366	1502	tags=21%, list=11%, signal=19%	CHI3L1/PTHLH/SULF2/TGFBI/STC1/MGP/CSF1/ITGB8/EFEMP1/WNT2B/EVC/BMP2/RUNX1/NOG/CSGALNACT1/CCN2/TGFBR2/CCN3/LOX/TGFB1/BMPR1B/SCIN/TSKU/GPLD1/TIMP1/SELENOM/THRA/BMP4/HYAL2/BBS2/GREM1/LUM/ZNF516/TGFBR1/MKKS
GO:0007143	GO:0007143	female meiotic nuclear division	23	-0.758237650762035	-2.07740287192683	7.64205154696636e-05	0.00173111896483399	0.00139479370785845	194	tags=43%, list=1%, signal=43%	RAD51C/MLH1/CDC25B/FBXO5/AURKA/TRIP13/PLK1/TOP2A/CCNB2/TTK
GO:0071772	GO:0071772	response to BMP	103	0.479619439587451	1.80206390501499	7.81723833674627e-05	0.00175592252723721	0.00141477838451861	1856	tags=24%, list=13%, signal=21%	PCSK6/LRP2/SFRP4/GDF15/FST/HTRA1/BMP2/NOG/GATA6/ITGA3/TGFB1/BMPR1B/SFRP1/HIPK2/BMP4/PDCD4/SKIL/GREM1/UBE2D1/SLC33A1/TGFBR3/SMAD7/PELO/SMURF1/ACVR2B
GO:0071773	GO:0071773	cellular response to BMP stimulus	103	0.479619439587451	1.80206390501499	7.81723833674627e-05	0.00175592252723721	0.00141477838451861	1856	tags=24%, list=13%, signal=21%	PCSK6/LRP2/SFRP4/GDF15/FST/HTRA1/BMP2/NOG/GATA6/ITGA3/TGFB1/BMPR1B/SFRP1/HIPK2/BMP4/PDCD4/SKIL/GREM1/UBE2D1/SLC33A1/TGFBR3/SMAD7/PELO/SMURF1/ACVR2B
GO:0051438	GO:0051438	regulation of ubiquitin-protein transferase activity	51	-0.607983069263796	-1.94505866391743	7.98824410563075e-05	0.00178682648488293	0.00143967825942484	1426	tags=29%, list=10%, signal=27%	BTRC/RPL5/UBE2L3/RPS2/UBE2N/RPL11/RPL23/PARK7/RPS7/UBE2S/FBXO5/MAD2L1/PLK1/CDC20/UBE2C
GO:0051293	GO:0051293	establishment of spindle localization	37	-0.681004338103291	-2.0596100529117	8.34856691233176e-05	0.00185131900569858	0.00149164104422758	1569	tags=32%, list=11%, signal=29%	KPNB1/PAFAH1B1/DYNLT1/GPSM2/MYH9/CFL1/CENPA/MAD2L1/SPDL1/PLK1/NUSAP1/NDC80
GO:0043488	GO:0043488	regulation of mRNA stability	160	-0.456864529140028	-1.75541343157221	8.40787816908837e-05	0.00185131900569858	0.00149164104422758	3722	tags=47%, list=27%, signal=35%	DHX9/MYD88/ANP32A/FXR1/PSME4/PSMC4/LARP1/AKT1/EXOSC6/RBM24/TENT5C/HNRNPA0/PSME1/LARP4B/HSPB1/RC3H1/METTL14/HNRNPC/RC3H2/EIF4G1/APEX1/FTO/YBX1/XPO1/HNRNPU/PSMA7/PSMD10/UBB/PSMD3/THRAP3/SERBP1/PSMC5/EXOSC7/PSMC6/FASTKD2/TARDBP/PRKCA/PSME3/SET/ZFP36/PSMB4/YWHAZ/PSMA1/PSME2/PSMB6/VIM/PSMA2/PCBP4/DCP1A/PSMD14/PSMD11/PSMA6/PSMA3/PSMB5/PSMB3/PSMC2/PSMB7/PSMC1/ELAVL1/UBA52/PSMB1/PSMB9/PSMA5/HSPA8/PSMB2/S…
GO:0008544	GO:0008544	epidermis development	192	0.419731684523256	1.72136342786134	8.41410793652289e-05	0.00185131900569858	0.00149164104422758	1442	tags=19%, list=10%, signal=18%	PCSK6/CTSK/PTHLH/KRTAP3-3/EREG/SFRP4/KRT33B/KRT38/ASAH1/FST/CYP26B1/KRT23/KRTAP1-5/ATP2A2/TMC1/EXPH5/PERP/RUNX1/GATA6/LAMA3/CTSL/CCN2/SMO/KRT40/KRTAP3-1/FZD3/MAFF/GRHL1/BCR/VDR/FGF7/BMP4/SOS1/TRIOBP/NCOA3/ERRFI1/DSP
GO:0015908	GO:0015908	fatty acid transport	84	0.517059398783039	1.88335850110956	8.42119939147278e-05	0.00185131900569858	0.00149164104422758	1734	tags=25%, list=12%, signal=22%	CD36/SLC1A2/PPFIA4/PTGES/FABP3/PLA2G4A/FABP4/PLA2R1/P2RX4/SLC2A1/GLS/PLIN2/SLC1A1/SLC27A1/SLC38A2/SNAP25/SLC7A11/ACACB/CROT/AKT2/PRKAA2
GO:0007077	GO:0007077	mitotic nuclear envelope disassembly	12	-0.872256790069183	-2.0618816847658	8.44971637468114e-05	0.00185131900569858	0.00149164104422758	223	tags=42%, list=2%, signal=41%	VRK1/CCNB1/PLK1/CCNB2/CDK1
GO:0000076	GO:0000076	DNA replication checkpoint	16	-0.813825248957027	-2.02968838616977	8.571103226314e-05	0.00187024970807652	0.00150689385186152	1372	tags=50%, list=10%, signal=45%	TOPBP1/RAD9B/TIMELESS/DNA2/CDC6/ORC1/CDC45/CLSPN
GO:0071166	GO:0071166	ribonucleoprotein complex localization	125	-0.479429815487759	-1.76912656440623	8.68638714060951e-05	0.00188770022982514	0.0015209540513211	3625	tags=46%, list=26%, signal=35%	POLDIP3/AGFG1/SUPT6H/NUP153/SRSF6/NOL6/NUP107/GLE1/NUP205/SRSF4/POLR2D/NMD3/CHTOP/SRSF9/SSB/UPF3B/CPSF3/ALYREF/XPO1/DDX19B/NUP93/RAE1/PABPN1/NUP88/TSC1/FYTTD1/NUP85/NCBP1/XPOT/SEH1L/NDC1/RIOK2/SRRM1/NXT1/SLBP/EIF4A3/SRSF2/NUP155/NUP35/SARNP/NUP37/ENY2/EIF4E/ABCE1/RBM8A/MAGOHB/THOC7/HNRNPA2B1/EIF6/SRSF3/RAN/WDR33/MAGOH/SRSF7/NPM1/DDX39A/SRSF1/DDX39B
GO:0043112	GO:0043112	receptor metabolic process	128	0.450336201064578	1.75523456636836	8.72434090634144e-05	0.00188827232734014	0.00152141500058594	1982	tags=29%, list=14%, signal=25%	CD36/SFRP4/MX1/LGMN/LRPAP1/ANGPT1/DKK1/INSR/MX2/GRIA1/PCSK9/VLDLR/GPRASP1/CD81/RAB29/ARAP1/TGFB1/GRK3/PHETA1/PLCG2/ADM/NTF3/TBC1D16/GREM1/ECE1/SNAP25/CDK5/EHD3/OPHN1/FMR1/PHETA2/LRP1/PLEKHJ1/SMURF1/GRK4/VEGFA/LDLRAP1
GO:0006873	GO:0006873	cellular ion homeostasis	389	0.339760440633746	1.5017788596371	9.05420349349029e-05	0.00195176499500803	0.00157257218571147	3132	tags=29%, list=22%, signal=23%	CCL7/SLC40A1/CD36/STC1/KCNJ2/SLC4A11/TMEM178A/MT2A/CXCR6/FTH1/SLC30A1/ISCU/LRRK2/ATP2A2/PRNP/PTGER3/TRPV1/TMEM38B/PTGIR/CYBRD1/GRIA1/SLC31A2/ACKR4/PACS2/TPCN1/TGM2/FYN/ATP6AP2/CD55/GRN/GPR18/TRPV2/CACNA1C/HEXB/WFS1/HVCN1/ATP6AP1L/SLC9A1/AQP11/ATP6AP1/ATP6V1A/PLCG2/ADM/SLC9A7/GPER1/P2RX4/PML/CEMIP/FTL/C1QTNF1/MT1X/F2RL2/ACO1/CKB/SLC1A1/P2RX7/ATP6V0A1/AKAP6/CDK5/F2R/TRPC1/ERO1A/LRP1/ATP1B3/PDGFRA/R…
GO:0000731	GO:0000731	DNA synthesis involved in DNA repair	47	-0.633983495647005	-1.97114831979076	9.52700597275765e-05	0.00204543670403062	0.00164804516764	873	tags=26%, list=6%, signal=24%	UBA52/PCNA/POLD3/RPS27A/RFC5/RPA3/RFC2/RFC3/RFC4/POLE2/DTL/PCLAF
GO:0043624	GO:0043624	cellular protein complex disassembly	193	-0.431719090558265	-1.70109659959326	9.79806997373248e-05	0.00208881995817241	0.00168299983634424	2250	tags=33%, list=16%, signal=28%	MRPL39/MRPL45/MRPS23/MRPL11/KIF2A/MRPL37/MRPL20/MRPL17/MAP1B/CKAP5/MRPS35/SPTA1/MRPS17/MRPL18/MRPS18C/MTRF1/WDR1/MRPL21/MRPL30/MRPS18B/MRPL3/PEX14/MRPL35/MRPS27/MICAL3/MRPL15/SH3GL1/MICAL2/MRPL52/MRPS36/MRPS28/GSPT1/ERAL1/CAPZB/MRPL51/EIF5AL1/MRPL47/CAPZA1/MRPL33/MRPS9/MRPL4/MRPL13/MRPL42/MRPL22/CFL2/CARMIL1/ABCE1/MRPL40/KIF24/HSPA8/MRPL1/MRPS22/CFL1/KIF18A/MRPL24/MRPL27/MRPL48/MRPS33/MRPS14/STMN…
GO:0006119	GO:0006119	oxidative phosphorylation	136	-0.47397155328147	-1.77670614938449	9.80721678827676e-05	0.00208881995817241	0.00168299983634424	2875	tags=43%, list=21%, signal=35%	NDUFA5/SHMT2/ATPSCKMT/STOML2/SDHAF2/TEFM/NDUFB1/COX7C/NDUFA4/COX2/COX10/NDUFA1/ATP5PD/NDUFAF1/NDUFB2/ATP5PF/MSH2/COX15/ATP5MF/NDUFA6/ATP5F1D/COX6B1/PPIF/NDUFS5/NDUFS1/SDHD/COX6C/UQCRQ/UQCC2/NDUFB7/ATP5MC3/ATP5F1E/UQCRH/CYC1/UQCR10/UQCRC2/SLC25A33/NDUFA12/ATP5MC2/ATP5F1C/NDUFS4/UQCRHL/NDUFB9/DLD/ATP5PB/ATP5ME/ATP5F1A/ATP5MG/COX7B/DNAJC15/NDUFB3/PARK7/COX7A2/NDUFA9/ATP5MC1/ATP5PO/CYCS/CCNB1/CDK1
GO:0030509	GO:0030509	BMP signaling pathway	100	0.486773629022366	1.81952783244761	0.000102554756050332	0.00217562589621062	0.00175294094301571	1856	tags=24%, list=13%, signal=21%	PCSK6/LRP2/SFRP4/GDF15/FST/HTRA1/BMP2/NOG/ITGA3/TGFB1/BMPR1B/SFRP1/HIPK2/BMP4/PDCD4/SKIL/GREM1/UBE2D1/SLC33A1/TGFBR3/SMAD7/PELO/SMURF1/ACVR2B
GO:0042255	GO:0042255	ribosome assembly	60	-0.584316332005083	-1.93037291585854	0.000108698942100302	0.00229685590698899	0.00185061814468248	1955	tags=40%, list=14%, signal=35%	MRPL20/NIP7/FASTKD2/RPS5/XRCC5/RPL5/EIF2A/ERAL1/RPF2/RPL38/RPL24/MRPL22/RPL11/RPS27/C1QBP/EIF6/RPL23A/NPM1/RPL6/RPL10/RPL10L/RPLP0P6/RPLP0/RPSA
GO:0006297	GO:0006297	nucleotide-excision repair, DNA gap filling	22	-0.755254951202735	-2.03662137843537	0.000110558809930915	0.0023269582594121	0.00187487215183301	873	tags=45%, list=6%, signal=43%	UBA52/PCNA/POLD3/RPS27A/LIG3/RFC5/RPA3/RFC2/RFC3/RFC4
GO:0071426	GO:0071426	ribonucleoprotein complex export from nucleus	124	-0.479667263825565	-1.76829205920264	0.00011988769287	0.00251341021993341	0.00202509985231802	3625	tags=47%, list=26%, signal=35%	POLDIP3/AGFG1/SUPT6H/NUP153/SRSF6/NOL6/NUP107/GLE1/NUP205/SRSF4/POLR2D/NMD3/CHTOP/SRSF9/SSB/UPF3B/CPSF3/ALYREF/XPO1/DDX19B/NUP93/RAE1/PABPN1/NUP88/TSC1/FYTTD1/NUP85/NCBP1/XPOT/SEH1L/NDC1/RIOK2/SRRM1/NXT1/SLBP/EIF4A3/SRSF2/NUP155/NUP35/SARNP/NUP37/ENY2/EIF4E/ABCE1/RBM8A/MAGOHB/THOC7/HNRNPA2B1/EIF6/SRSF3/RAN/WDR33/MAGOH/SRSF7/NPM1/DDX39A/SRSF1/DDX39B
GO:0086004	GO:0086004	regulation of cardiac muscle cell contraction	26	0.688257172289565	2.01019070031432	0.000126121648444472	0.00263377473665683	0.00212207970984696	654	tags=23%, list=5%, signal=22%	FGF13/PDE4B/STC1/KCNJ2/ATP2A2/CACNA1C
GO:0002062	GO:0002062	chondrocyte differentiation	75	0.525346168603245	1.88561882231517	0.000129086046164321	0.00268519067235198	0.00216350645465657	1710	tags=27%, list=12%, signal=24%	PTHLH/SULF2/TGFBI/EFEMP1/WNT2B/BMP2/RUNX1/CCN2/TGFBR2/CCN3/TGFB1/BMPR1B/SCIN/TSKU/GPLD1/BMP4/GREM1/TGFBR1/SMAD7/HOXA11
GO:0055117	GO:0055117	regulation of cardiac muscle contraction	50	0.589387610113297	1.96122939398412	0.000136616225928978	0.00283081528610976	0.00228083882701501	1651	tags=30%, list=12%, signal=27%	FGF13/PDE4B/STC1/KCNJ2/RGS2/ATP2A2/TMEM38B/TNNI3K/CCN2/CACNA1C/SLC9A1/P2RX4/DSP/EHD3/SMAD7
GO:0010743	GO:0010743	regulation of macrophage derived foam cell differentiation	18	0.770519052831294	2.0506514999848	0.000138816715124298	0.00286530563341504	0.00230862832062031	576	tags=28%, list=4%, signal=27%	AGT/CD36/CSF1/APOB/MSR1
GO:0050685	GO:0050685	positive regulation of mRNA processing	28	-0.711411120963234	-2.03342650730938	0.000140612788741728	0.00289121526389722	0.00232950417623947	1979	tags=50%, list=14%, signal=43%	DAZAP1/THRAP3/NCBP1/TRA2A/LEO1/SF3B4/PRDX6/RBMX/RBMXL1/HSPA8/NCL/TRA2B/RBM3/CCNB1
GO:1902969	GO:1902969	mitotic DNA replication	16	-0.803359840670393	-2.0035875522584	0.000147817915239452	0.00302771867766326	0.00243948743359483	2296	tags=81%, list=16%, signal=68%	POLA1/RTF2/CHEK2/ZMPSTE24/MCM6/MCM3/MCMDC2/MCM2/RAD51/GINS1/MCM4/BRCA2/CDC45
GO:0042274	GO:0042274	ribosomal small subunit biogenesis	72	-0.551248228793024	-1.86666485499825	0.000159026283339751	0.00324073174972767	0.0026111158997156	3735	tags=58%, list=27%, signal=43%	NOL10/ERCC2/PRKDC/BYSL/UTP6/DDX52/RPP40/NOP14/UTP4/RPS28/NGDN/METTL17/NAT10/LSM6/HEATR1/RRP36/RPS10/UTP20/GTF2H5/NOL11/RPS5/RIOK2/WDR3/XRCC5/DCAF13/EMG1/ERAL1/TSR3/SNU13/RPL38/RPS8/BMS1/RPS25/RPS24/RPS27/RPS17/RPS6/RPS21/RPS16/RPS7/NPM1/RPSA
GO:0043407	GO:0043407	negative regulation of MAP kinase activity	59	0.560465108919644	1.92869509958434	0.000159429938304972	0.00324073174972767	0.0026111158997156	2481	tags=34%, list=18%, signal=28%	AGT/RGS4/DUSP4/RGS2/SPRY1/SPRED3/SMPD1/PTPN22/SFRP1/BMP4/RGS3/PDCD4/HYAL2/GPS1/DUSP5/UCHL1/PPP2R1A/HIPK3/LAX1/DAB2IP
GO:0031146	GO:0031146	SCF-dependent proteasomal ubiquitin-dependent protein catabolic process	83	-0.534565012884323	-1.85776508007447	0.000161462055413671	0.00326960662212683	0.00263438090411779	2183	tags=36%, list=16%, signal=31%	PSMA7/PSMD10/PSMD3/PSMC5/PSMC6/PSME3/PSMB4/PSMA1/PSME2/PSMB6/PSMA2/BTRC/PSMD14/PSMD11/PSMA6/PSMA3/PSMB5/PSMB3/PSMC2/PSMB7/PSMC1/RBX1/PSMB1/PSMB9/PSMA5/PSMB2/PSMA4/CCNF/SKP2/KIF14
GO:0030855	GO:0030855	epithelial cell differentiation	389	0.333054553798024	1.47213809549686	0.000163314329171154	0.00329463548584524	0.00265454711010273	1990	tags=23%, list=14%, signal=20%	PCSK6/CTSK/FASN/KRTAP3-3/STC1/EREG/SFRP4/KRT33B/KRT38/AKR1B1/ASAH1/ATOH8/CYP26B1/LAMA1/XDH/KLF5/KRT23/KRTAP1-5/SPRY1/TMC1/EXPH5/TMEM38B/CDKN1A/PSAP/SPRED3/ONECUT2/TMOD1/LAMB2/CCND1/BMP2/PERP/RUNX1/GATA6/SCUBE1/CTSL/STAT1/SMO/IKBKB/KRT40/KRTAP3-1/PTK7/MAFF/CEBPB/TPP1/AKR1C1/GRHL1/BCR/VDR/SDC1/CBR1/THRA/GPX1/BMP4/SKIL/CTSB/GREM1/TRIOBP/ADD1/NCOA3/SOX4/ID2/ERRFI1/GPAT4/DSP/SLC7A11/FEM1B/KIAA1109/OPH…
GO:0072395	GO:0072395	signal transduction involved in cell cycle checkpoint	69	-0.552538533904703	-1.8646169301714	0.000167170928288111	0.00335975858130918	0.00270701796024911	2166	tags=38%, list=15%, signal=32%	TRIAP1/CNOT6/CDC5L/CHEK2/MDM4/CNOT9/CNOT2/PCBP4/TP53/PRMT1/RPL26/TFDP1/PCNA/CDK2/CASP2/ZWILCH/CHEK1/BRCA1/E2F7/AURKA/CCNB1/PLK1/GTSE1/DTL/CDC25C/CDK1
GO:0000470	GO:0000470	maturation of LSU-rRNA	28	-0.708060638550206	-2.02384982295604	0.000168520173317869	0.00337419043654429	0.00271864596576668	2806	tags=68%, list=20%, signal=54%	RSL1D1/DDX18/RPL7L1/ZNHIT3/NOL9/RPL35/WDR12/NSA2/NIFK/GTPBP4/SNU13/RPF2/EIF6/RPL7A/RPL7/MRPL1/RRP15/MAK16/RPL10A
GO:0030003	GO:0030003	cellular cation homeostasis	383	0.341658796151571	1.50693919955465	0.000170175407337753	0.00339176668460405	0.00273280746517805	2354	tags=22%, list=17%, signal=19%	CCL7/SLC40A1/CD36/STC1/KCNJ2/SLC4A11/TMEM178A/MT2A/CXCR6/FTH1/SLC30A1/ISCU/LRRK2/ATP2A2/PRNP/PTGER3/TRPV1/TMEM38B/PTGIR/CYBRD1/GRIA1/SLC31A2/ACKR4/PACS2/TPCN1/TGM2/FYN/ATP6AP2/CD55/GRN/GPR18/TRPV2/CACNA1C/HEXB/WFS1/HVCN1/ATP6AP1L/SLC9A1/AQP11/ATP6AP1/ATP6V1A/PLCG2/ADM/SLC9A7/GPER1/P2RX4/PML/CEMIP/FTL/C1QTNF1/MT1X/F2RL2/ACO1/SLC1A1/P2RX7/ATP6V0A1/AKAP6/CDK5/F2R/TRPC1/ERO1A/LRP1/ATP1B3/PDGFRA/RASA3…
GO:0051445	GO:0051445	regulation of meiotic cell cycle	28	-0.707304862063531	-2.02168958691766	0.000170666898271322	0.00339176668460405	0.00273280746517805	194	tags=36%, list=1%, signal=35%	NPM2/PDE3A/CDC25A/CDC25B/FBXO5/TRIP13/RAD51AP1/CDC25C/CDC20/TTK
GO:0007034	GO:0007034	vacuolar transport	136	0.441743271215789	1.72235832534432	0.000173822918846393	0.00344169379315857	0.0027730346351635	2521	tags=32%, list=18%, signal=26%	SLC46A3/LRRK2/MON1A/PSAP/FHIP1B/MON1B/PCSK9/GNPTAB/PRKN/NPC1/GPRASP1/GRN/GCC2/SCARB2/PCDHGA3/VPS39/PINK1/CCDC91/CHMP2B/SORT1/EPG5/TMEM50B/RNF157/EHD3/LAMP1/LRP1/VPS18/HOOK3/VTI1B/HGSNAT/SMURF1/CHMP1B/ARSB/TGFBRAP1/IGF2R/LAMP2/CLN3/VPS13C/GAK/VPS11/TMEM106B/VPS13A/CLU
GO:0006283	GO:0006283	transcription-coupled nucleotide-excision repair	71	-0.543863713971757	-1.83343360126321	0.000187129191851429	0.00369148582892154	0.00297429657430976	3681	tags=52%, list=26%, signal=39%	POLR2F/MNAT1/ERCC2/GTF2H1/POLR2A/POLR2K/POLR2I/POLR2D/POLR2C/CCNH/PPIE/RFC1/ISY1/CDK7/XAB2/UBB/GTF2H5/ERCC8/COPS5/POLR2G/COPS6/COPS4/UBA52/GTF2H2/COPS3/RBX1/PCNA/POLR2H/POLD3/RPS27A/LIG3/RFC5/RPA3/GTF2H3/RFC2/RFC3/RFC4
GO:0045143	GO:0045143	homologous chromosome segregation	31	-0.678552258672248	-1.98785290517625	0.000188545664328591	0.00370575412316415	0.00298579279579178	587	tags=39%, list=4%, signal=37%	NDC1/P3H4/MLH1/AGO4/SGO2/FANCD2/BRIP1/TRIP13/CCNE2/PLK1/SGO1/PTTG1
GO:0034103	GO:0034103	regulation of tissue remodeling	46	0.596822995086924	1.97735001457444	0.00019172738270144	0.00375448567004358	0.00302505668021705	1320	tags=33%, list=9%, signal=30%	PDK4/LEPR/GPNMB/RUNX1/CST3/SIGLEC15/SYT7/SPP1/TGFB1/ATP6AP1/SFRP1/GPR137B/TMBIM1/GREM1/P2RX7
GO:0006521	GO:0006521	regulation of cellular amino acid metabolic process	54	-0.60982394643979	-1.97455311118741	0.00019281462276622	0.00376199625294968	0.00303110809204522	2183	tags=54%, list=16%, signal=46%	PSMA7/AZIN1/PSMD10/PSMD3/NQO1/PSMC5/PSMC6/PSME3/PSMB4/PSMA1/PSME2/PSMB6/PSMA2/PSMD14/PSMD11/PSMA6/PSMA3/PSMB5/PSMB3/PSMC2/PSMB7/PSMC1/PSMB1/PSMB9/PSMA5/PARK7/PSMB2/PSMA4/ODC1
GO:0051315	GO:0051315	attachment of mitotic spindle microtubules to kinetochore	14	-0.818825098913859	-2.00565807868781	0.000193978063359872	0.00377093355171591	0.00303830903452094	245	tags=57%, list=2%, signal=56%	SEH1L/BOD1/RMDN1/CENPE/NUF2/AURKB/NDC80/KIF2C
GO:0032467	GO:0032467	positive regulation of cytokinesis	25	-0.720988515715206	-2.00849323951509	0.000205405042225996	0.00397860636137744	0.00320563475510593	1423	tags=48%, list=10%, signal=43%	ECT2/RHOA/PKP4/CDC25B/CIT/CDC42/KIF23/KIF20B/RACGAP1/CDC6/AURKB/KIF14
GO:0015718	GO:0015718	monocarboxylic acid transport	90	0.488006488093722	1.80602955581536	0.000227560149355215	0.00439182873087719	0.00353857545567753	1458	tags=22%, list=10%, signal=20%	CD36/SLC1A2/PPFIA4/PTGES/SLC16A6/PLA2G4A/ABCC3/PLA2R1/SLC6A8/AKR1C1/SLCO2A1/P2RX4/SLC16A12/GLS/SLC1A1/SLC27A1/SLC38A2/STARD5/SNAP25/SLC7A11
GO:0031123	GO:0031123	RNA 3'-end processing	137	-0.458861793639925	-1.72472383599715	0.000243590109956635	0.00468429038787111	0.00377421707664729	2099	tags=27%, list=15%, signal=23%	PABPN1/SNRPA/PAPOLG/PNPT1/CSTF1/NCBP1/EXOSC7/INTS14/SRRM1/SLBP/EIF4A3/PTCD1/SRSF2/LEO1/HSD17B10/SARNP/RBM8A/MAGOHB/THOC7/DKC1/CPSF6/SRSF3/INTS7/RPS21/WDR33/MAGOH/EXOSC2/SRSF7/EXOSC8/DDX39A/EXOSC9/SRSF1/CSTF3/FBL/DDX39B/BARD1/CCNB1
GO:0032890	GO:0032890	regulation of organic acid transport	34	0.638415564519929	1.96835236030289	0.000248157564235303	0.0047550191340571	0.00383120450047486	975	tags=21%, list=7%, signal=19%	PTGES/RGS4/RGS2/FABP3/PLA2G4A/PLA2R1/P2RX4
GO:0051988	GO:0051988	regulation of attachment of spindle microtubules to kinetochore	13	-0.831228750357331	-2.01861759567562	0.000265072657412901	0.00506099438046204	0.00407773426366012	531	tags=46%, list=4%, signal=44%	CDC42/RACGAP1/CCNB1/SPAG5/AURKB/NEK2
GO:0006399	GO:0006399	tRNA metabolic process	172	-0.432074846184551	-1.67511630239068	0.00026666145632004	0.00507321048215991	0.00408757699667205	2938	tags=37%, list=21%, signal=29%	ADAT1/AARSD1/DARS1/ELAC1/QTRT2/METTL1/SSB/NAT10/LSM6/MARS1/ELP4/OSGEPL1/POLR3K/FARS2/RPP14/GARS1/PPA2/METTL2A/CDKAL1/METTL6/TYW3/RTCB/EPRS1/PRORP/TRMU/YARS2/LARS1/IARS1/TPRKB/ZBTB8OS/AIMP1/PUS7/QARS1/TSEN15/MTO1/NSUN3/KARS1/TARS1/RARS1/PTCD1/ALKBH8/ELP3/TRMT10A/POP5/WARS2/DTD1/HSD17B10/METTL2B/AIMP2/SLFN13/DDX1/EARS2/TRDMT1/TRMT1/THG1L/VARS1/WDR4/RPP30/WARS1/EEF1E1/DARS2/FARSB/POP1
GO:0042776	GO:0042776	mitochondrial ATP synthesis coupled proton transport	21	-0.753934704747656	-2.00370362102332	0.000270699676113562	0.00513177471100391	0.00413476324993167	2774	tags=76%, list=20%, signal=61%	ATPSCKMT/STOML2/ATP5PD/ATP5PF/ATP5MF/ATP5F1D/ATP5MC3/ATP5F1E/ATP5MC2/ATP5F1C/ATP5PB/ATP5ME/ATP5F1A/ATP5MG/ATP5MC1/ATP5PO
GO:0042770	GO:0042770	signal transduction in response to DNA damage	119	-0.478446434586595	-1.75812157869655	0.000272427124177401	0.00514627351891303	0.00414644520042375	2318	tags=31%, list=17%, signal=26%	BRCC3/NBN/KDM1A/TRIAP1/CNOT6/CDC5L/PSMD10/CHEK2/MDM4/CNOT9/CNOT2/PMAIP1/TWIST1/ZMPSTE24/ANKRD1/PCBP4/TP53/PRMT1/RPL26/TFDP1/PCNA/CDK2/CASP2/KMT5A/EEF1E1/CHEK1/BRCA1/E2F7/AURKA/BRCA2/FOXM1/CCNB1/PLK1/GTSE1/DTL/CDC25C/CDK1
GO:0040001	GO:0040001	establishment of mitotic spindle localization	29	-0.700134552362389	-2.01985881189157	0.000275679147134133	0.00518936873443337	0.00418116779122636	1569	tags=34%, list=11%, signal=31%	KPNB1/PAFAH1B1/DYNLT1/GPSM2/CENPA/MAD2L1/SPDL1/PLK1/NUSAP1/NDC80
GO:0006897	GO:0006897	endocytosis	402	0.326292326235286	1.44754725879752	0.00029383555086825	0.00551173633312865	0.004440905167693	2403	tags=27%, list=17%, signal=23%	CD36/LRP2/CD14/SFRP4/MX1/LOXL4/LRPAP1/APOB/ANGPT1/BCL2L1/LRRK2/JCHAIN/DKK1/ATP9A/INSR/ELMO1/MX2/SMPD1/SCAMP5/GRIA1/ACKR4/GSN/PCSK9/TSC2/VLDLR/CYTH2/NPC1/LRP10/MSR1/CTSL/CLTCL1/TGFBR2/PLA2R1/FCHSD2/CD81/SCARB2/UNC119/ITGA4/MARCHF3/GRK3/PLCG2/ADM/MFGE8/STON1/TOR1A/RIN2/ARHGAP25/ZFYVE9/NTF3/STEAP2/SNX9/MARCHF2/ITSN2/TOM1/RHOBTB1/ARHGAP12/LGALS3BP/ESYT2/SORT1/GREM1/BTBD8/LMBR1L/WASL/MIA3/SLC9B2/SNAP2…
GO:0048514	GO:0048514	blood vessel morphogenesis	418	0.326905001961467	1.45110687371747	0.000315232074942444	0.00589241493930877	0.00474762477241252	1953	tags=23%, list=14%, signal=20%	CHI3L1/LRP2/ANGPTL4/TGFBI/LEPR/SAT1/EREG/MMP2/ITGB8/HDAC9/JCAD/GPNMB/CTSH/ANGPTL2/CCL2/NFATC4/LAMA1/APOB/XDH/ANGPT1/KLF5/PLXDC1/BSG/COL8A2/APOD/EPAS1/RUNX1/SCG2/NOG/GATA6/SEMA5A/CCN2/TGFBR2/TIPARP/EFEMP2/GRN/CCN3/VASH1/LOX/STAT1/SMO/TGFB1/CYP1B1/FAP/ANGPT2/ADM/SP100/MFGE8/RIN2/SEMA6A/PML/SFRP1/GPLD1/ZNF304/EMC10/HIPK2/PRCP/GPX1/BMP4/SOS1/GADD45A/GREM1/EGR3/SLC1A1/SOX4/MECP2/PIK3R3/MIA3/DLL4/RECK/…
GO:0033238	GO:0033238	regulation of cellular amine metabolic process	59	-0.572337462842925	-1.87900383146877	0.000318419301559336	0.00593125291336658	0.00477891722714397	2183	tags=51%, list=16%, signal=43%	PSMA7/AZIN1/PSMD10/PSMD3/NQO1/PSMC5/PSMC6/PSME3/PSMB4/PSMA1/PSME2/PSMB6/PSMA2/PSMD14/PSMD11/PSMA6/PSMA3/PSMB5/PSMB3/PSMC2/PSMB7/PSMC1/HPRT1/PSMB1/PSMB9/PSMA5/PARK7/PSMB2/PSMA4/ODC1
GO:1903054	GO:1903054	negative regulation of extracellular matrix organization	10	0.844522318144335	1.91871474647675	0.000334813166590113	0.00621496940482898	0.00500751271084336	805	tags=50%, list=6%, signal=47%	DPP4/ANTXR1/CST3/TGFB1/FAP
GO:0032212	GO:0032212	positive regulation of telomere maintenance via telomerase	30	-0.681862266177389	-1.98771290108944	0.000339586776565227	0.00628176784608202	0.00506133341724608	1590	tags=33%, list=11%, signal=30%	CCT6A/XRCC5/CCT8/CCT3/DKC1/CCT5/CCT2/HNRNPA1/AURKB/NEK2
GO:1904035	GO:1904035	regulation of epithelial cell apoptotic process	61	0.536744862765201	1.87430976048338	0.000344229373192203	0.00634569044512247	0.00511283700581668	1953	tags=39%, list=14%, signal=34%	ANGPTL4/SFRP4/NUPR1/CCL2/ANGPT1/GSN/SCG2/SEMA5A/PLA2R1/WFS1/ITGA4/TNIP2/GPER1/GAS6/CAST/PDCD4/SORT1/MAPK7/ICAM1/NFE2L2/IL6/YAP1/CD40/PLCG1
GO:0010498	GO:0010498	proteasomal protein catabolic process	429	-0.345803996881997	-1.4675278067884	0.000348206954718531	0.00639695663204558	0.00515414309534537	2512	tags=22%, list=18%, signal=19%	GLMN/FAF1/SMURF2/USP14/UBXN11/FBXO48/ERLIN1/PCNP/FBXW8/DVL1/XPO1/CDC26/PSME3IP1/HSPA5/PSMA7/RAD23B/PSMD10/UBB/PSMD3/FBXO45/ERCC8/HECW1/FOXF2/PSMC5/PSMC6/UBXN8/SUMO2/UFD1/PSME3/PMAIP1/ANAPC1/PSMB4/PSMA1/PSME2/EIF3H/PSMB6/DNAJC18/PSMA2/BTRC/SUMO1/PSMD14/COMMD1/PSMD11/SMARCC1/CDC23/NUDT15/TAF9/PSMA6/DERL2/PSMA3/ARIH1/PSMB5/PSMB3/ERLIN2/PSMC2/DDA1/PSMB7/PPP2R5C/PSMC1/UBE2V2/UBA52/RPL11/NEDD4L/RACK1/R…
GO:0042339	GO:0042339	keratan sulfate metabolic process	24	0.698908023323763	1.99871371929857	0.000351922245820213	0.00644306961011938	0.00519129715175311	1552	tags=46%, list=11%, signal=41%	FMOD/PRELP/CHST2/HEXA/HEXB/B4GAT1/GNS/ST3GAL3/LUM/ST3GAL6/GALNS
GO:0051236	GO:0051236	establishment of RNA localization	181	-0.427310291761804	-1.66526606958154	0.000353768799369656	0.00645477133593918	0.00520072544286198	3661	tags=45%, list=26%, signal=34%	FLOT1/POLDIP3/LRPPRC/AGFG1/XPO5/SUPT6H/NUP153/SRSF6/NOL6/NUP107/SNUPN/GLE1/NUP205/SRSF4/QKI/POLR2D/NMD3/MYO1C/CHTOP/SRSF9/NXT2/SSB/AHCTF1/UPF3B/CPSF3/PARP11/YBX1/ALYREF/XPO1/DDX19B/HNRNPA1L2/HNRNPU/NUP93/RAE1/PABPN1/SFPQ/NUP88/PNPT1/TSC1/FYTTD1/NUP85/NCBP1/CKAP5/XPOT/SEH1L/MRPL18/PHAX/ZFP36/NDC1/RIOK2/SRRM1/CETN3/NXT1/SLBP/EIF4A3/SRSF2/KHDRBS1/NUP155/NUP35/EIF5AL1/SARNP/NUP37/ENY2/EIF4E/ABCE1/RBM…
GO:0051299	GO:0051299	centrosome separation	14	-0.809060353724679	-1.98173997932692	0.00035502340356403	0.006455629644399	0.00520141699743649	242	tags=43%, list=2%, signal=42%	CEP85/RANBP1/CHEK1/AURKA/KIF11/NEK2
GO:0072594	GO:0072594	establishment of protein localization to organelle	499	-0.338814455470429	-1.45679842572125	0.000367532478562589	0.00666043603523932	0.00536643319278542	2209	tags=28%, list=16%, signal=24%	HSPA5/TCP1/TIMM23B/HEATR3/NUP93/TOMM5/APPL2/HSPA4/TIMM44/TRAM2/UBB/ECT2/MAIP1/GSTK1/PMPCA/SLC27A2/AP2B1/SRPRA/NUP88/BCS1L/NUP85/CSE1L/SSR3/TARDBP/IPO4/CHMP4A/RPS5/GOSR2/PMAIP1/KPNA1/YWHAZ/CCT6A/KPNB1/NXT1/RAB8B/YWHAE/PEX3/PEX14/CALM3/SAE1/IMMP1L/PMPCB/AP3M1/TP53/RPL34/RPL5/PRKAA1/RUVBL2/RPL19/RPL31/IPO9/CCT8/FLNA/RPL12/RPL35A/RPL26/CHCHD4/UBE2L3/RPL15/RPL27A/RPL41/RPL22/YWHAH/TIMM21/NUP155/HAX1/R…
GO:0034762	GO:0034762	regulation of transmembrane transport	333	0.341503171038434	1.48225274514225	0.000372005897875177	0.00671872814202938	0.00541340019240834	1716	tags=19%, list=12%, signal=17%	KCNH6/FGF13/PDE4B/CATSPER2/KCNJ2/RGS4/RGS2/SLC30A1/AMIGO1/CCL2/CACNA1E/ISCU/TMC1/PRNP/TMEM38B/INSR/GRIA1/SLC31A2/PIK3R1/PCSK9/CTSS/TPCN1/FYN/CLTCL1/GEM/TSPAN13/CACNA1C/HVCN1/GRIA4/KCNQ3/OSBPL8/SLC9A1/KCNJ14/NOS1AP/STOM/PLCG2/PINK1/GNB5/GPER1/SLC2A1/CHRM3/KCND2/CEMIP/KCNC4/MEF2A/KLHL24/PSEN2/OAZ1/STAC/P2RX7/AKAP6/CDK5/EHD3/CREBL2/FMR1/F2R/TRPC1/SLMAP/CACNB4/UTRN/ATP1B3/NFE2L2/AKT2
GO:0016570	GO:0016570	histone modification	386	-0.358622504007543	-1.51119374768319	0.000375950039602899	0.00672888856531639	0.0054215866283251	2624	tags=23%, list=19%, signal=19%	PPP5C/YEATS4/SNW1/TADA1/GTF2B/DR1/TRERF1/SMAD4/SUDS3/TAF12/BRD4/BRCC3/ING3/KDM1A/USP16/OTUB1/EHMT1/PAX5/KDM4C/SMARCB1/SFPQ/TADA2A/ATF2/PRKD1/BRD8/SUV39H1/AASS/CREBBP/RPS6KA4/RIOX2/PRKCA/TAF10/PWP1/SET/TWIST1/WDR5B/ZMPSTE24/HAT1/PCGF1/PRMT5/TP53/SUPT3H/PRKAA1/RUVBL2/MORF4L1/MSL3/LEO1/PRMT1/PRMT6/TAF5L/TAF9/TAF5/HASPIN/EYA3/ACTL6A/HDAC1/KDM5C/TET1/MAPK8/WDR61/ENY2/PCGF5/UBE2N/TBL1XR1/CDK2/DNMT1/PAR…
GO:0009187	GO:0009187	cyclic nucleotide metabolic process	26	0.667311704268408	1.94901533342377	0.000376676782233562	0.00672888856531639	0.0054215866283251	1537	tags=31%, list=11%, signal=27%	PTHLH/PDE4B/PDE7B/ADCY4/AMPD2/NPR2/PDE8B/ADCY6
GO:0050657	GO:0050657	nucleic acid transport	178	-0.433880378755082	-1.68210983736183	0.000377603174260179	0.00672888856531639	0.0054215866283251	3661	tags=46%, list=26%, signal=34%	FLOT1/POLDIP3/LRPPRC/AGFG1/XPO5/SUPT6H/NUP153/SRSF6/NOL6/NUP107/SNUPN/GLE1/NUP205/SRSF4/QKI/POLR2D/NMD3/MYO1C/CHTOP/SRSF9/NXT2/SSB/AHCTF1/UPF3B/CPSF3/PARP11/YBX1/ALYREF/XPO1/DDX19B/HNRNPA1L2/HNRNPU/NUP93/RAE1/PABPN1/SFPQ/NUP88/PNPT1/TSC1/FYTTD1/NUP85/NCBP1/CKAP5/XPOT/SEH1L/MRPL18/PHAX/ZFP36/NDC1/RIOK2/SRRM1/CETN3/NXT1/SLBP/EIF4A3/SRSF2/KHDRBS1/NUP155/NUP35/EIF5AL1/SARNP/NUP37/ENY2/EIF4E/ABCE1/RBM…
GO:0050658	GO:0050658	RNA transport	178	-0.433880378755082	-1.68210983736183	0.000377603174260179	0.00672888856531639	0.0054215866283251	3661	tags=46%, list=26%, signal=34%	FLOT1/POLDIP3/LRPPRC/AGFG1/XPO5/SUPT6H/NUP153/SRSF6/NOL6/NUP107/SNUPN/GLE1/NUP205/SRSF4/QKI/POLR2D/NMD3/MYO1C/CHTOP/SRSF9/NXT2/SSB/AHCTF1/UPF3B/CPSF3/PARP11/YBX1/ALYREF/XPO1/DDX19B/HNRNPA1L2/HNRNPU/NUP93/RAE1/PABPN1/SFPQ/NUP88/PNPT1/TSC1/FYTTD1/NUP85/NCBP1/CKAP5/XPOT/SEH1L/MRPL18/PHAX/ZFP36/NDC1/RIOK2/SRRM1/CETN3/NXT1/SLBP/EIF4A3/SRSF2/KHDRBS1/NUP155/NUP35/EIF5AL1/SARNP/NUP37/ENY2/EIF4E/ABCE1/RBM…
GO:0006644	GO:0006644	phospholipid metabolic process	313	0.349263355359847	1.50581228018564	0.000380253636771872	0.00675360778133697	0.00544150334558664	2999	tags=30%, list=21%, signal=24%	LIPG/PLPPR5/FABP3/PLA2G4A/PLPP2/TMEM38B/PLA2G4C/SMPD1/PIK3R1/PCSK9/TMEM150A/OSBPL10/GATA6/PLBD1/SERINC2/PLPP1/LCAT/PTDSS1/HEXB/PIGT/PTDSS2/OSBPL8/ABHD16A/GPX4/PLCG2/PTPN13/PGAP1/MPPE1/GPLD1/PI4K2A/ABHD4/CHKA/LPCAT2/PLD6/PGS1/PTPMT1/VAC14/PLD2/ACP6/SLC27A1/MTMR10/PLEKHA1/PLPP5/MECP2/PIK3R3/FADS1/GPAT4/PLA2G15/PIP4P1/PIGZ/LPCAT4/PISD/SLC44A3/PIP4K2B/DGKE/GDPD1/PLPP3/TTC7B/ITPKB/IP6K1/GDE1/LPIN2/PLC…
GO:0060415	GO:0060415	muscle tissue morphogenesis	40	0.597136518250721	1.90270775013648	0.000383818667630446	0.00679435297070319	0.00547433247801947	1699	tags=38%, list=12%, signal=33%	LRP2/MYL3/WNT2/TNNT2/ACTC1/BMP2/NOG/EFEMP2/TGFB1/DLL4/DSP/TGFBR1/TGFBR3/SMAD7/HEG1
GO:1904358	GO:1904358	positive regulation of telomere maintenance via telomere lengthening	32	-0.682227050449606	-2.00386747362598	0.000391815632509412	0.00691302432803734	0.0055699481265538	1590	tags=34%, list=11%, signal=31%	CCT6A/XRCC5/CCT8/CCT3/DKC1/HNRNPA2B1/CCT5/CCT2/HNRNPA1/AURKB/NEK2
GO:0003018	GO:0003018	vascular process in circulatory system	148	0.417086382704922	1.64589733916628	0.000395727838786668	0.00695908232287345	0.00560705788197731	1730	tags=24%, list=12%, signal=21%	AGT/CD36/SLC1A2/LRP2/LEPR/RGS2/SOD2/ANGPT1/ABCC3/INSR/SCPEP1/TGFB1/ADM/SLC2A13/GPER1/SLC5A3/SLC2A1/CHRM3/SLC16A12/GPX1/KCNMB2/BBS2/ECE1/SLC1A1/SLC27A1/SLC38A2/SLC6A6/MKKS/ADCY6/GCLC/F2R/ICAM1/LRP1/TJP2/CTNNBIP1
GO:0006942	GO:0006942	regulation of striated muscle contraction	54	0.566932143312101	1.91628213339419	0.000401496205978714	0.00703737284315476	0.00567013796329558	1651	tags=30%, list=12%, signal=26%	FGF13/PDE4B/STC1/KCNJ2/RGS2/MYL3/ATP2A2/TMEM38B/TNNI3K/CCN2/CACNA1C/SLC9A1/P2RX4/DSP/EHD3/SMAD7
GO:1901136	GO:1901136	carbohydrate derivative catabolic process	145	0.43307671708239	1.7042184900814	0.000405274575182566	0.00708038522524835	0.00570479381371537	1403	tags=25%, list=10%, signal=23%	CHI3L1/FMOD/PDE4B/PRELP/PDE7B/UPP1/XDH/OVGP1/FBXO6/HEXA/MANBA/NEU1/AMPD3/CST3/FUCA1/IDS/CTSL/HEXB/SDC3/TGFB1/SLC9A1/NEIL2/MMP12/EDEM2/GNS/GM2A/SDC1/CEMIP/GPC4/SGSH/MAN1B1/HYAL2/ENTPD4/NEIL1/PDE8B/LUM
GO:0008202	GO:0008202	steroid metabolic process	205	0.388231271965051	1.60627982881497	0.000427554925805394	0.00744530499464377	0.00599881623999888	2044	tags=25%, list=15%, signal=22%	AGT/LRP2/FASN/LEPR/AKR1B1/ASAH1/CYP27A1/LGMN/CYP26B1/APOB/SMPD1/BMP2/PCSK9/FAXDC2/IGFBP7/VLDLR/NPC1/NPC2/NFE2L1/TIPARP/LCAT/SPP1/CYB5R1/CYP1B1/MBTPS1/ADM/DHCR7/AKR1C1/TSKU/VDR/DKK3/PLEKHA1/MECP2/CYP51A1/HSD17B12/PIP4P1/ACOT8/HSD17B2/ACACB/AKR1C2/HSD11B1/ACAA1/LSS/PRKAA2/FMO5/PDGFRA/GPAM/LDLRAP1/APOL1/LDLR/TM7SF2
GO:0006611	GO:0006611	protein export from nucleus	172	-0.425380810601818	-1.64916411324466	0.000442068184817137	0.00767304063646888	0.00618230694556297	3556	tags=42%, list=25%, signal=32%	AGFG1/IL1B/HSPA9/XPO5/SUPT6H/ANP32B/NUP153/SRSF6/NOL6/NUP107/GLE1/NUP205/SRSF4/POLR2D/NMD3/RBM22/CALR/CHTOP/SRSF9/SSB/UPF3B/TCF7L2/CPSF3/ALYREF/XPO1/DDX19B/NUP93/RAE1/PABPN1/NUP88/TSC1/FYTTD1/NUP85/NCBP1/CSE1L/XPOT/SEH1L/NDC1/RIOK2/SRRM1/CTDSPL2/NXT1/SLBP/YWHAE/EIF4A3/SRSF2/TP53/NUP155/NUP35/SARNP/NUP37/ENY2/EIF4E/ABCE1/RBM8A/MAGOHB/THOC7/HNRNPA2B1/EIF6/PARK7/SRSF3/CCHCR1/RAN/WDR33/MAGOH/SRSF7/NP…
GO:0090288	GO:0090288	negative regulation of cellular response to growth factor stimulus	65	0.511805220582583	1.79377123697304	0.000444672987644514	0.00769327440759732	0.00619860965914274	1929	tags=23%, list=14%, signal=20%	AGT/LRP2/SULF2/XDH/SPRY1/HTRA1/NOG/SEMA6A/SFRP1/HIPK2/SKIL/GREM1/SMAD7/SMURF1/EPN2
GO:0048024	GO:0048024	regulation of mRNA splicing, via spliceosome	87	-0.508974667225428	-1.78022847279666	0.000458677045731505	0.00790995963380847	0.00637319684595354	2862	tags=44%, list=20%, signal=35%	LARP7/TIA1/SRSF9/PTBP1/SRPK1/SNW1/SAP18/CWC22/HNRNPU/SRSF10/RBM4/DAZAP1/THRAP3/NCBP1/RBM23/SMU1/TRA2A/PCBP4/KHDRBS1/SF3B4/HNRNPL/RBFOX2/PRDX6/RBM8A/RBMX/RBM25/C1QBP/RBMXL1/HNRNPA2B1/HSPA8/SRSF3/RBM7/NCL/MAGOH/SRSF7/HNRNPA1/TRA2B/RBM3
GO:0022617	GO:0022617	extracellular matrix disassembly	50	0.564193860090042	1.87739539027848	0.000488410898457257	0.00839564200370577	0.00676451987303129	1075	tags=32%, list=8%, signal=30%	CTSK/DPP4/MMP11/MMP2/MMP3/BSG/HTRA1/CTSS/SCUBE1/CST3/CTSL/TGFB1/FAP/MMP12/TIMP1/DDR1
GO:0019884	GO:0019884	antigen processing and presentation of exogenous antigen	148	-0.441801142462393	-1.66852663503201	0.00050104424960325	0.00858520050762491	0.00691725057144567	2183	tags=32%, list=16%, signal=28%	CLTA/TAP2/PSMA7/SEC23A/KIF2A/PSMD10/PSMD3/AP2B1/PSMC5/PSMC6/PSME3/PSMB4/PSMA1/PSME2/PSMB6/SAR1B/PSMA2/AP1S1/PSMD14/PSMD11/DYNLL1/SEC24D/PSMA6/PSMA3/PSMB5/PSMB3/PSMC2/CAPZB/PSMB7/CAPZA1/PSMC1/AP2S1/CTSV/PSMB1/PSMB9/PSMA5/PSMB2/KIF18A/PSMA4/ACTR1A/AP1M2/CENPE/KIF23/RACGAP1/KIF15/KIF11/KIF2C/KIF4A
GO:1901615	GO:1901615	organic hydroxy compound metabolic process	353	0.330531184659546	1.44281857842233	0.000515228950576211	0.00879137258977559	0.00708336712886402	2569	tags=27%, list=18%, signal=22%	CTSK/PLCH1/LRP2/FASN/LEPR/MOXD1/AKR1B1/ASAH1/CYP27A1/LGMN/RDH10/CYP26B1/PLA2G4A/APOB/PLPP2/AKR1B10/DHRS3/PFKFB2/EPAS1/GK/SMPD1/BMP2/PCSK9/PRKN/FAXDC2/VLDLR/NPC1/NPC2/NFE2L1/PLPP1/LCAT/PCBD1/CYB5R1/PLTP/CYP1B1/CTNS/MBTPS1/PLCG2/DHCR7/AKR1C1/GPER1/SLC5A3/TSKU/VDR/CHKA/RETSAT/DIO2/HAGH/DKK3/SNCAIP/MAOA/MECP2/CYP51A1/TTR/CPQ/PIP4P1/GCNT4/SLC7A11/ACOT8/ACACB/TRPC1/AKR1C2/ACAA1/LSS/PRKAA2/GDPD1/PLPP3/I…
GO:0034765	GO:0034765	regulation of ion transmembrane transport	329	0.34503884959692	1.4955688854631	0.000516365692702869	0.00879137258977559	0.00708336712886402	1716	tags=19%, list=12%, signal=17%	KCNH6/FGF13/PDE4B/CATSPER2/KCNJ2/RGS4/RGS2/SLC30A1/AMIGO1/CCL2/CACNA1E/ISCU/TMC1/PRNP/TMEM38B/INSR/GRIA1/SLC31A2/PIK3R1/PCSK9/CTSS/TPCN1/FYN/CLTCL1/GEM/TSPAN13/CACNA1C/HVCN1/GRIA4/KCNQ3/OSBPL8/SLC9A1/KCNJ14/NOS1AP/STOM/PLCG2/PINK1/GNB5/GPER1/SLC2A1/CHRM3/KCND2/CEMIP/KCNC4/MEF2A/KLHL24/PSEN2/OAZ1/STAC/P2RX7/AKAP6/CDK5/EHD3/CREBL2/FMR1/F2R/TRPC1/SLMAP/CACNB4/UTRN/ATP1B3/NFE2L2/AKT2
GO:0007100	GO:0007100	mitotic centrosome separation	13	-0.817218754713163	-1.98459468235543	0.000523957445457979	0.00889230636005828	0.00716469128425748	242	tags=46%, list=2%, signal=45%	CEP85/RANBP1/CHEK1/AURKA/KIF11/NEK2
GO:0006605	GO:0006605	protein targeting	392	-0.34837654179008	-1.46902927575924	0.00053348694911998	0.00902538363922598	0.00727191404330099	3051	tags=35%, list=22%, signal=28%	ACOX2/RPS28/RPL8/MYO1C/SRP14/SRPRB/ZDHHC6/PECR/PEX26/HSD17B4/RPL36/TIMM9/ROMO1/NACA2/GRPEL2/YWHAG/SRP19/TRAM1L1/SCP2/MICALL1/SRP54/GRPEL1/HSP90AA1/PEX19/RPS10/PDCD5/RPL35/SRP72/IMMP2L/SRP9/TCAF2/HSPA5/TIMM23B/TOMM5/HSPA4/TIMM44/TRAM2/UBB/GSTK1/PMPCA/SLC27A2/SRPRA/SSR3/NACA/CHMP4A/RPS5/GOSR2/RAB8B/PEX3/PEX14/SAE1/IMMP1L/PMPCB/AP3M1/RPL34/RPL5/PRKAA1/RPL19/RPL31/NACA4P/AP4B1/RPL12/RPL35A/RPL26/CHCH…
GO:0034728	GO:0034728	nucleosome organization	119	-0.470056379776417	-1.72729109205918	0.000547544815718455	0.0092246724536522	0.00743248462802387	2254	tags=32%, list=16%, signal=27%	SUPT16H/CENPL/RBBP7/OIP5/CENPS/SMARCB1/H3-3B/IPO4/RBBP4/SET/DAXX/NASP/HAT1/SMARCC1/TSPYL4/ACTR6/SMARCE1/CENPX/INO80/CENPO/CENPQ/CHAF1A/ITGB3BP/NPM1/MCM2/CENPW/CENPA/ANP32E/H4C3/CENPM/HMGB2/CENPI/CENPU/CENPK/CHAF1B/HJURP/CENPN/KNL1
GO:0055008	GO:0055008	cardiac muscle tissue morphogenesis	35	0.614969184739069	1.90781157885414	0.00054871789006012	0.0092246724536522	0.00743248462802387	1699	tags=40%, list=12%, signal=35%	LRP2/MYL3/WNT2/TNNT2/ACTC1/BMP2/NOG/TGFB1/DLL4/DSP/TGFBR1/TGFBR3/SMAD7/HEG1
GO:0046058	GO:0046058	cAMP metabolic process	17	0.741321647235485	1.95076544178242	0.000562059800713744	0.00939429649338754	0.00756915376985091	150	tags=24%, list=1%, signal=23%	PTHLH/PDE4B/PDE7B/ADCY4
GO:0061013	GO:0061013	regulation of mRNA catabolic process	178	-0.42830595794142	-1.66049837819615	0.000562322274202023	0.00939429649338754	0.00756915376985091	3722	tags=44%, list=27%, signal=33%	DHX9/MYD88/ANP32A/FXR1/PSME4/PSMC4/LARP1/AKT1/EXOSC6/RBM24/CNOT8/TENT5C/HNRNPA0/PSME1/LARP4B/HSPB1/RC3H1/METTL14/HNRNPC/RC3H2/EIF4G1/APEX1/FTO/YBX1/XPO1/HNRNPU/PSMA7/PSMD10/UBB/PSMD3/THRAP3/PNPT1/SERBP1/PSMC5/EXOSC7/PSMC6/FASTKD2/TARDBP/PRKCA/PSME3/SET/ZFP36/PSMB4/YWHAZ/PSMA1/PSME2/PSMB6/VIM/PSMA2/POLR2G/PCBP4/DCP1A/PSMD14/PSMD11/PSMA6/PSMA3/PSMB5/PSMB3/PSMC2/PSMB7/PSMC1/ELAVL1/UBA52/PRR5L/PSMB1/…
GO:0034340	GO:0034340	response to type I interferon	74	0.500843565127083	1.79111698899189	0.000571410178048431	0.00951638259142341	0.00766752073642952	2704	tags=36%, list=19%, signal=30%	OAS1/MX1/IFI6/ISG15/HLA-E/IRF9/MX2/SMPD1/STAT2/STAT1/IRF1/MMP12/SP100/IRAK1/OAS2/TRIM56/IFI27/IP6K2/XAF1/IFITM3/TYK2/IFITM1/HLA-B/USP18/IFNAR2/YTHDF2/TBK1
GO:0001763	GO:0001763	morphogenesis of a branching structure	130	0.420083956558511	1.64765871697116	0.000577594270884453	0.009589499913504	0.00772643267884663	1927	tags=24%, list=14%, signal=21%	AGT/CSF1/RDH10/CTSH/NFATC4/LAMA1/BCL11A/SPRY1/LRRK2/WNT2/WNT2B/BMP2/NOG/TGM2/SEMA3C/TGFBR2/SMO/ADM/PML/SFRP1/FGF7/DDR1/BMP4/CELSR1/GREM1/DLL4/FEM1B/HOXA11/CTNNBIP1/YAP1/VEGFA
GO:0015985	GO:0015985	energy coupled proton transport, down electrochemical gradient	25	-0.695697936105755	-1.93804002554315	0.000595166973064952	0.00982025505557171	0.00791235625010326	2774	tags=72%, list=20%, signal=58%	ATPSCKMT/STOML2/ATP5PD/ATP5MGL/ATP5PF/ATP5MF/VPS9D1/ATP5F1D/ATP5MC3/ATP5F1E/ATP5MC2/ATP5F1C/ATP5PB/ATP5ME/ATP5F1A/ATP5MG/ATP5MC1/ATP5PO
GO:0015986	GO:0015986	ATP synthesis coupled proton transport	25	-0.695697936105755	-1.93804002554315	0.000595166973064952	0.00982025505557171	0.00791235625010326	2774	tags=72%, list=20%, signal=58%	ATPSCKMT/STOML2/ATP5PD/ATP5MGL/ATP5PF/ATP5MF/VPS9D1/ATP5F1D/ATP5MC3/ATP5F1E/ATP5MC2/ATP5F1C/ATP5PB/ATP5ME/ATP5F1A/ATP5MG/ATP5MC1/ATP5PO
GO:0007041	GO:0007041	lysosomal transport	99	0.46676752655907	1.74480206027502	0.000599659669996893	0.00986394029477967	0.00794755423361065	2521	tags=34%, list=18%, signal=28%	LRRK2/PSAP/FHIP1B/PCSK9/GNPTAB/PRKN/NPC1/GPRASP1/GRN/GCC2/SCARB2/PCDHGA3/VPS39/PINK1/CCDC91/CHMP2B/SORT1/EPG5/RNF157/EHD3/LAMP1/LRP1/VPS18/HOOK3/HGSNAT/ARSB/TGFBRAP1/IGF2R/LAMP2/CLN3/GAK/VPS11/TMEM106B/CLU
GO:0051168	GO:0051168	nuclear export	185	-0.417373471998894	-1.63066554756202	0.000613742122269731	0.0100557765955883	0.00810212019397629	3556	tags=42%, list=25%, signal=31%	AGFG1/IL1B/HSPA9/XPO5/SUPT6H/ANP32B/NUP153/SRSF6/NOL6/NUP107/GLE1/NUP205/SRSF4/POLR2D/NMD3/RBM22/CALR/CHTOP/SRSF9/SSB/UPF3B/TCF7L2/CPSF3/ALYREF/XPO1/DDX19B/NUP93/RAE1/PABPN1/NUP88/TSC1/FYTTD1/NUP85/NCBP1/CSE1L/XPOT/SEH1L/PHAX/NDC1/RIOK2/SRRM1/CTDSPL2/NXT1/SLBP/YWHAE/EIF4A3/SRSF2/TP53/KHDRBS1/NUP155/NUP35/SARNP/NUP37/ENY2/EIF4E/ABCE1/RBM8A/MAGOHB/THOC7/CPSF6/HNRNPA2B1/EIF6/PARK7/SRSF3/CCHCR1/RAN/W…
GO:0009070	GO:0009070	serine family amino acid biosynthetic process	16	-0.774142095414197	-1.93071820064689	0.000615083978069094	0.0100557765955883	0.00810212019397629	1475	tags=50%, list=11%, signal=45%	MTHFD1/CTH/GGT1/SEPHS1/PHGDH/PSAT1/CBS/DHFR
GO:0006941	GO:0006941	striated muscle contraction	101	0.463550988650804	1.73382019205926	0.000631513414531919	0.0102928985185599	0.00829317359520093	1814	tags=25%, list=13%, signal=22%	FGF13/PDE4B/MYH3/STC1/KCNJ2/RGS2/MYL3/ATP2A2/TMEM38B/TNNT2/ACTC1/GSN/TNNI3K/CCN2/CACNA1C/ARHGEF11/SLC9A1/NOS1AP/P2RX4/STAC/DSP/EHD3/SMAD7/GAA/KCNJ3
GO:0006268	GO:0006268	DNA unwinding involved in DNA replication	15	-0.787852898222837	-1.94633099137766	0.00064474954442554	0.0104766901656503	0.00844125783327247	1228	tags=53%, list=9%, signal=49%	BLM/MCM6/SSBP1/MCMDC2/MCM2/RAD51/MCM7/MCM4
GO:0015849	GO:0015849	organic acid transport	179	0.384678367814593	1.56834090681059	0.000650875854128416	0.0105147539300014	0.00847192649330845	2486	tags=27%, list=18%, signal=23%	CD36/SLC1A2/LRP2/PPFIA4/PTGES/FOLR3/RGS4/RGS2/FABP3/PLA2G4A/ABCC3/FABP4/PLA2R1/SLC3A2/SLC38A10/CTNS/SLC17A5/AKR1C1/P2RX4/SLC2A1/SLC38A6/SLC25A30/SLC47A1/GLS/PLIN2/SLC1A1/SLC27A1/SLC38A2/STARD5/SLC6A6/SNAP25/SLC7A11/ACACB/CROT/SLC22A4/SLC7A7/AKT2/PRKAA2/SLC25A45/SLC27A3/SLC26A6/CLN3/PDPN/SLC19A1/ACSL4/STXBP1/ABCD4/MPC2/SLC38A1
GO:0000027	GO:0000027	ribosomal large subunit assembly	27	-0.692389775833067	-1.96560057691724	0.000651025729672737	0.0105147539300014	0.00847192649330845	3331	tags=67%, list=24%, signal=51%	RPL3/NLE1/RSL24D1/MRTO4/RPL3L/MRPL20/FASTKD2/RPL5/RPF2/RPL38/RPL24/RPL11/RPL23A/RPL6/RPL10/RPL10L/RPLP0P6/RPLP0
GO:0055082	GO:0055082	cellular chemical homeostasis	484	0.308732097450698	1.38761629109245	0.000654546020749047	0.0105397681533868	0.00849208090331357	2971	tags=26%, list=21%, signal=21%	CCL7/SLC40A1/CD36/STC1/KCNJ2/SLC4A11/TMEM178A/MT2A/CXCR6/FTH1/SLC30A1/ISCU/LRRK2/ATP2A2/PRNP/PTGER3/TRPV1/TMEM38B/ANO1/PTGIR/CYBRD1/GRIA1/SLC31A2/ACKR4/PACS2/PIK3R1/TPCN1/TGM2/FYN/ATP6AP2/CD55/GRN/GPR18/TRPV2/CACNA1C/HEXB/WFS1/HVCN1/ATP6AP1L/SLC9A1/AQP11/ATP6AP1/ATP6V1A/PLCG2/ADM/SLC9A7/GPER1/P2RX4/PML/ERN1/GPLD1/CEMIP/FTL/C1QTNF1/GAS6/MT1X/F2RL2/ACO1/CKB/SLC1A1/P2RX7/ATP6V0A1/SOX4/SLC9B2/ZBTB20/…
GO:0001523	GO:0001523	retinoid metabolic process	50	0.556560341818678	1.85199431269147	0.000659317438470154	0.0105735171408942	0.00851927306998623	1677	tags=36%, list=12%, signal=32%	LRP2/RARRES2/AKR1B1/RDH10/CYP26B1/APOB/AKR1B10/DHRS3/SCPEP1/SDC3/CYP1B1/AKR1C1/SDC1/RETSAT/GPC4/TTR/LRP1/AGRN
GO:1903115	GO:1903115	regulation of actin filament-based movement	27	0.670070041773256	1.95853048989973	0.000660597591668287	0.0105735171408942	0.00851927306998623	654	tags=22%, list=5%, signal=21%	FGF13/PDE4B/STC1/KCNJ2/ATP2A2/CACNA1C
GO:0031424	GO:0031424	keratinization	41	0.583608843635631	1.87933609359635	0.000663230291078015	0.0105839675704569	0.00852769316917907	797	tags=24%, list=6%, signal=23%	PCSK6/KRTAP3-3/KRT33B/KRT38/CYP26B1/KRT23/KRTAP1-5/PERP/KRT40/KRTAP3-1
GO:0010232	GO:0010232	vascular transport	56	0.544157921408981	1.85318663105847	0.000673087216847752	0.0107092983966312	0.00862867447161968	1667	tags=27%, list=12%, signal=24%	CD36/SLC1A2/LRP2/LEPR/ABCC3/INSR/SLC2A13/SLC5A3/SLC2A1/SLC16A12/SLC1A1/SLC27A1/SLC38A2/SLC6A6/LRP1
GO:0019886	GO:0019886	antigen processing and presentation of exogenous peptide antigen via MHC class II	75	-0.519755070432348	-1.77299237853255	0.000679097972146041	0.0107093149235774	0.00862868778767768	1319	tags=23%, list=9%, signal=21%	AP1S1/DYNLL1/SEC24D/CAPZB/CAPZA1/AP2S1/CTSV/KIF18A/ACTR1A/AP1M2/CENPE/KIF23/RACGAP1/KIF15/KIF11/KIF2C/KIF4A
GO:0072401	GO:0072401	signal transduction involved in DNA integrity checkpoint	66	-0.550274033457631	-1.83713577868034	0.000679097972146041	0.0107093149235774	0.00862868778767768	2166	tags=38%, list=15%, signal=32%	TRIAP1/CNOT6/CDC5L/CHEK2/MDM4/CNOT9/CNOT2/PCBP4/TP53/PRMT1/RPL26/TFDP1/PCNA/CDK2/CASP2/CHEK1/BRCA1/E2F7/AURKA/CCNB1/PLK1/GTSE1/DTL/CDC25C/CDK1
GO:0072422	GO:0072422	signal transduction involved in DNA damage checkpoint	66	-0.550274033457631	-1.83713577868034	0.000679097972146041	0.0107093149235774	0.00862868778767768	2166	tags=38%, list=15%, signal=32%	TRIAP1/CNOT6/CDC5L/CHEK2/MDM4/CNOT9/CNOT2/PCBP4/TP53/PRMT1/RPL26/TFDP1/PCNA/CDK2/CASP2/CHEK1/BRCA1/E2F7/AURKA/CCNB1/PLK1/GTSE1/DTL/CDC25C/CDK1
GO:0006890	GO:0006890	retrograde vesicle-mediated transport, Golgi to endoplasmic reticulum	82	-0.50706767214208	-1.7661319274024	0.000685906226664509	0.010784866728672	0.00868956123687669	2533	tags=30%, list=18%, signal=25%	KLC2/ZW10/RAB1B/ARCN1/KIF2A/ERGIC3/BET1L/TMED2/COPZ2/PITPNB/COPA/ARF4/SCFD1/COPB2/COPG1/COPZ1/KIF18A/BNIP1/CENPE/KIF23/RACGAP1/KIF15/KIF11/KIF2C/KIF4A
GO:0010885	GO:0010885	regulation of cholesterol storage	14	0.771266289851915	1.90899138515062	0.000697026534514097	0.0109275772830275	0.00880454569912544	576	tags=21%, list=4%, signal=21%	CD36/APOB/MSR1
GO:0150104	GO:0150104	transport across blood-brain barrier	55	0.544269850056378	1.84238275510744	0.000702902842752529	0.0109874812788158	0.00885281142672621	1667	tags=27%, list=12%, signal=24%	CD36/SLC1A2/LRP2/LEPR/ABCC3/INSR/SLC2A13/SLC5A3/SLC2A1/SLC16A12/SLC1A1/SLC27A1/SLC38A2/SLC6A6/LRP1
GO:0016569	GO:0016569	covalent chromatin modification	397	-0.350157961068069	-1.48036041406611	0.000720046468521441	0.0112226484568969	0.00904228985480969	2624	tags=23%, list=19%, signal=19%	PPP5C/YEATS4/SNW1/TADA1/GTF2B/DR1/DNMT3A/TRERF1/SMAD4/SUDS3/TAF12/PPHLN1/BRD4/BRCC3/ING3/KDM1A/USP16/OTUB1/EHMT1/PAX5/KDM4C/SMARCB1/SFPQ/TADA2A/ATF2/PRKD1/BRD8/SUV39H1/AASS/CREBBP/RPS6KA4/RIOX2/PRKCA/TAF10/PWP1/SET/TWIST1/WDR5B/ZMPSTE24/HAT1/PCGF1/PRMT5/TP53/SUPT3H/PRKAA1/RUVBL2/MORF4L1/MSL3/LEO1/PRMT1/PRMT6/TAF5L/HELLS/TAF9/TAF5/HASPIN/EYA3/ACTL6A/HDAC1/KDM5C/TET1/MAPK8/WDR61/ENY2/PCGF5/UBE2N/TB…
GO:0044706	GO:0044706	multi-multicellular organism process	129	0.426249515787766	1.66190164312629	0.000728432468216906	0.0112740419048012	0.00908369848080152	1075	tags=20%, list=8%, signal=19%	PTHLH/STC1/ACVR1C/MMP2/AKR1B1/RGS2/OVGP1/PAPPA/BSG/PLA2G4C/PAM/IGFBP7/TGFBR2/HEXB/ITGA3/SPP1/PSG9/PSG6/ANGPT2/MAFF/ADM/SLC2A1/VDR/SERPINE2/TIMP1/DDR1
GO:0006775	GO:0006775	fat-soluble vitamin metabolic process	19	0.726469255553423	1.97326171048756	0.000729280833775498	0.0112740419048012	0.00908369848080152	1073	tags=37%, list=8%, signal=34%	LRP2/CYP27A1/LGMN/CYP26B1/PLTP/VDR/CBR1
GO:0044774	GO:0044774	mitotic DNA integrity checkpoint	96	-0.495738634319125	-1.76491022692967	0.000729670501133788	0.0112740419048012	0.00908369848080152	2244	tags=33%, list=16%, signal=28%	NBN/TRIAP1/CNOT6/DONSON/MSH2/CHEK2/ATF2/MDM4/CNOT9/CNOT2/PCBP4/TP53/TOPBP1/RAD9B/PRMT1/RPL26/BLM/TFDP1/PCNA/CDK2/CASP2/EME1/FANCD2/E2F7/AURKA/CCNB1/CDC6/ORC1/GTSE1/CLSPN/CDC25C/CDK1
GO:0060993	GO:0060993	kidney morphogenesis	55	0.542891692604716	1.83771761791033	0.00073239479868411	0.0112835233249719	0.00909133783168626	2999	tags=45%, list=21%, signal=36%	AGT/KLHL3/LRRK2/WNT2B/BMP2/NOG/STAT1/SMO/KIF26B/BMP4/GREM1/SOX4/GCNT4/HOXA11/CTNNBIP1/NPHP3/VEGFA/PKD2/LIF/PRKX/AHI1/HOXD11/GZF1/PBX1/FGF2
GO:0032886	GO:0032886	regulation of microtubule-based process	171	-0.41482515034057	-1.607499758718	0.000753737474833361	0.0115789670702849	0.00932938217488843	636	tags=12%, list=5%, signal=11%	CCDC65/KIF18A/RPS3/MAPRE1/NPM1/STIL/RBM14/SKA2/STMN1/CCNF/BORA/BRCA1/PSRC1/AURKA/TPX2/PLK1/SKA3/PLK4/SPAG5/SKA1
GO:0030282	GO:0030282	bone mineralization	69	0.50190873724726	1.7742371276186	0.000760248306295409	0.0116455227663474	0.00938300729712205	1320	tags=23%, list=9%, signal=21%	PTHLH/MGP/ISG15/ADGRV1/TMEM38B/ASPN/BMP2/KLF10/ANKH/LOX/TGFB1/BMPR1B/GPM6B/BMP4/GREM1/P2RX7
GO:0098660	GO:0098660	inorganic ion transmembrane transport	493	0.305996543438187	1.38072683670409	0.000777678959161127	0.0118784906162154	0.00957071368687919	2370	tags=24%, list=17%, signal=21%	KCNH6/SLC40A1/FGF13/PDE4B/CATSPER2/KCNJ2/RGS4/SLC4A11/SLC30A1/AMIGO1/CACNA1E/ISCU/ATP2A2/TMC1/PRNP/TRPV1/BEST1/TMEM38B/GLRB/ANO1/SLC31A2/KCNT2/PCSK9/NIPAL2/SLC12A7/PACC1/TPCN1/FYN/GABRE/PCYOX1/GEM/TSPAN13/TRPV2/CACNA1C/ANKH/KCNMB3/SLC3A2/HVCN1/KCNQ3/ATP6AP1L/SLC9A1/SLC39A3/KCNJ14/NOS1AP/ATP6AP1/STOM/ATP6V1A/CACHD1/SLC6A16/SLC17A5/TCN2/SLC6A8/PLCG2/SLC9A7/GNB5/GPER1/P2RX4/KCND2/CEMIP/KCNC4/SLC25A3…
GO:0097711	GO:0097711	ciliary basal body-plasma membrane docking	93	-0.481005908933953	-1.70993541713223	0.000782322705253139	0.0119153765877017	0.00960043337800523	1922	tags=35%, list=14%, signal=31%	DCTN3/CEP192/YWHAG/SCLT1/TMEM216/ODF2/HAUS1/HSP90AA1/NEDD1/CEP41/CKAP5/MKS1/YWHAE/PAFAH1B1/NPHP1/CEP135/RPGRIP1L/DYNLL1/CC2D2A/CEP89/CEP43/CNTRL/KIF24/HAUS8/MAPRE1/ACTR1A/B9D1/TUBB/TUBA1A/PLK1/PLK4/CDK1/NEK2
GO:0002478	GO:0002478	antigen processing and presentation of exogenous peptide antigen	145	-0.446284442084304	-1.67946329551755	0.000791030918491982	0.012013782074597	0.00967972044996767	2183	tags=33%, list=16%, signal=28%	CLTA/TAP2/PSMA7/SEC23A/KIF2A/PSMD10/PSMD3/AP2B1/PSMC5/PSMC6/PSME3/PSMB4/PSMA1/PSME2/PSMB6/SAR1B/PSMA2/AP1S1/PSMD14/PSMD11/DYNLL1/SEC24D/PSMA6/PSMA3/PSMB5/PSMB3/PSMC2/CAPZB/PSMB7/CAPZA1/PSMC1/AP2S1/CTSV/PSMB1/PSMB9/PSMA5/PSMB2/KIF18A/PSMA4/ACTR1A/AP1M2/CENPE/KIF23/RACGAP1/KIF15/KIF11/KIF2C/KIF4A
GO:0060048	GO:0060048	cardiac muscle contraction	84	0.476401780627582	1.73526551417582	0.000833444278749168	0.0126220768107452	0.010169834467397	975	tags=20%, list=7%, signal=19%	FGF13/PDE4B/STC1/KCNJ2/RGS2/MYL3/ATP2A2/TMEM38B/TNNT2/ACTC1/GSN/TNNI3K/CCN2/CACNA1C/SLC9A1/NOS1AP/P2RX4
GO:0034754	GO:0034754	cellular hormone metabolic process	71	0.490394550020608	1.74910726183329	0.000842045915865363	0.0127163205260345	0.0102457683250701	1832	tags=30%, list=13%, signal=26%	AKR1B1/RDH10/CYP26B1/AKR1B10/DHRS3/BMP2/TIPARP/SCPEP1/SPP1/CYP1B1/ADM/AKR1C1/RETSAT/DKK3/ECE1/PLEKHA1/TTR/HSD17B12/HSD17B2/AKR1C2/PDGFRA
GO:0006417	GO:0006417	regulation of translation	315	-0.360740469832507	-1.49910376292744	0.000874199415103788	0.0131647044313939	0.0106070393079457	3672	tags=39%, list=26%, signal=30%	IREB2/FXR1/PRKDC/POLDIP3/MAPK1/LRPPRC/TACO1/LARP1/AKT1/RBM24/CNOT8/PER2/MAPK3/EIF3C/GLE1/MTIF2/SELENOT/RMND1/DAPK3/QKI/POLR2D/LARP4B/HSPB1/RC3H1/ZNF706/CALR/CPEB2/ETF1/RBM4B/METTL14/EIF4B/NGDN/SHMT2/GUF1/TRNAU1AP/TIA1/NAT10/ILF3/EIF4G1/EEF2/UPF3B/PTCD3/PCIF1/FTO/EIF2S3B/YBX1/GAPDH/METTL5/SRP9/USP16/DPH5/DNAJC24/CNOT6/EPRS1/RBM4/EIF3D/TMED2/TSC1/CNOT9/NCBP1/PUS7/CNOT2/FASTKD2/TARDBP/EIF3E/ZFP36/EI…
GO:0046850	GO:0046850	regulation of bone remodeling	33	0.618168495724466	1.90170909193707	0.000886422138001294	0.0133112717689745	0.010725131249856	1958	tags=36%, list=14%, signal=31%	PDK4/LEPR/SIGLEC15/SYT7/SPP1/ATP6AP1/SFRP1/GPR137B/GREM1/P2RX7/IL6/TF
GO:0006026	GO:0006026	aminoglycan catabolic process	42	0.57509866507215	1.86966498227728	0.000899785598964193	0.0134741003139008	0.0108563251392053	1823	tags=50%, list=13%, signal=44%	CHI3L1/FMOD/PRELP/OVGP1/HEXA/FUCA1/IDS/HEXB/SDC3/TGFB1/SLC9A1/GNS/SDC1/CEMIP/GPC4/SGSH/HYAL2/LUM/GALNS/AGRN/HGSNAT
GO:0007186	GO:0007186	G protein-coupled receptor signaling pathway	419	0.317995460239476	1.41140286170428	0.000926159566578124	0.0138190793060647	0.0111342809223653	2417	tags=23%, list=17%, signal=20%	CCL7/AGT/PTHLH/PDE4B/SUCNR1/EREG/RGS4/PDE7B/RGS2/CXCR6/ADCY4/CCL2/PLXNB1/PTGER3/ADGRV1/DGKI/GPR150/GLRB/OBSCN/PSAP/ANO1/PTGIR/INSR/ACKR4/GABBR2/PIK3R1/AGTRAP/TGM2/GABRE/GPRASP1/GPR18/PLPP1/FGD4/ARHGEF11/SMO/GRM3/GPRC5B/FZD3/GRK3/SCG5/PDE6B/ADM/GNA14/GNB5/GPER1/CHRM3/APLP2/ARHGEF18/RGS3/F2RL2/SOS1/SORT1/CELSR1/ATRNL1/ABR/PDE8B/CPE/PREX2/RNF157/GNG11/ADCY6/VAV3/F2R/USP33/AKR1C2/LRP1/AGRN/CDK5R1/DGK…
GO:0010878	GO:0010878	cholesterol storage	16	0.7471259443021	1.9357985030006	0.000927992792906327	0.0138190793060647	0.0111342809223653	576	tags=19%, list=4%, signal=18%	CD36/APOB/MSR1
GO:0006875	GO:0006875	cellular metal ion homeostasis	324	0.339698952014166	1.47811235381542	0.000935226091077686	0.0138303045891806	0.0111433253350123	2230	tags=21%, list=16%, signal=18%	CCL7/SLC40A1/CD36/STC1/KCNJ2/TMEM178A/MT2A/CXCR6/FTH1/SLC30A1/ISCU/ATP2A2/PRNP/PTGER3/TRPV1/TMEM38B/PTGIR/CYBRD1/GRIA1/SLC31A2/ACKR4/PACS2/TPCN1/TGM2/FYN/CD55/GPR18/TRPV2/CACNA1C/HEXB/WFS1/SLC9A1/ATP6AP1/ATP6V1A/PLCG2/ADM/GPER1/P2RX4/PML/CEMIP/FTL/C1QTNF1/MT1X/F2RL2/ACO1/SLC1A1/P2RX7/AKAP6/CDK5/F2R/TRPC1/ERO1A/LRP1/ATP1B3/PDGFRA/RASA3/CD40/PDZD8/TRPV3/PLCG1/TF/ITGAV/STIM2/ACKR3/SLC22A17/CLN3/TRPM…
GO:0007268	GO:0007268	chemical synaptic transmission	363	0.325303218296787	1.42524441950946	0.000936507718160002	0.0138303045891806	0.0111433253350123	2042	tags=21%, list=15%, signal=19%	SLC1A2/PPFIA4/RGS4/PDE7B/PCDHB16/CLSTN2/SLC30A1/LGMN/PCDHB11/CCL2/NFATC4/CACNA1E/LRRK2/ATP2A2/TRPV1/DGKI/GLRB/SQSTM1/NPTX1/PCDHB14/GRIA1/NISCH/GABBR2/SLC12A7/PRKN/FYN/GABRE/SYT7/FCHSD2/COLQ/UNC119/KCNQ3/GRM3/TOR1A/PINK1/GPER1/P2RX4/NTF3/BCR/CHRM3/KCND2/KCNC4/SERPINE2/INSYN2A/MME/GLS/RAB3B/PCDHB13/SYNGR1/EGR3/SLC1A1/SNCAIP/P2RX7/ABR/MECP2/PTPRA/TSHZ3/SNAP25/SLC7A11/CDK5/OPHN1/CADPS/FMR1/F2R/LYNX1/…
GO:0098916	GO:0098916	anterograde trans-synaptic signaling	363	0.325303218296787	1.42524441950946	0.000936507718160002	0.0138303045891806	0.0111433253350123	2042	tags=21%, list=15%, signal=19%	SLC1A2/PPFIA4/RGS4/PDE7B/PCDHB16/CLSTN2/SLC30A1/LGMN/PCDHB11/CCL2/NFATC4/CACNA1E/LRRK2/ATP2A2/TRPV1/DGKI/GLRB/SQSTM1/NPTX1/PCDHB14/GRIA1/NISCH/GABBR2/SLC12A7/PRKN/FYN/GABRE/SYT7/FCHSD2/COLQ/UNC119/KCNQ3/GRM3/TOR1A/PINK1/GPER1/P2RX4/NTF3/BCR/CHRM3/KCND2/KCNC4/SERPINE2/INSYN2A/MME/GLS/RAB3B/PCDHB13/SYNGR1/EGR3/SLC1A1/SNCAIP/P2RX7/ABR/MECP2/PTPRA/TSHZ3/SNAP25/SLC7A11/CDK5/OPHN1/CADPS/FMR1/F2R/LYNX1/…
GO:0048644	GO:0048644	muscle organ morphogenesis	42	0.574371902858249	1.86730225402855	0.000947902028910223	0.013960011698496	0.0112478326875471	1699	tags=36%, list=12%, signal=31%	LRP2/MYL3/WNT2/TNNT2/ACTC1/BMP2/NOG/EFEMP2/TGFB1/DLL4/DSP/TGFBR1/TGFBR3/SMAD7/HEG1
GO:0000018	GO:0000018	regulation of DNA recombination	82	-0.499822092688105	-1.74089535660675	0.000955713793259155	0.0140363899416578	0.0113093720127717	1642	tags=26%, list=12%, signal=23%	KPNA1/CGAS/ACTR2/MLH1/TNFSF4/BLM/TIMELESS/PARP1/PARPBP/PPP4R2/FANCB/PTPRC/SHLD1/RMI2/KPNA2/ZRANB3/RAD51/CHEK1/POLQ/RAD51AP1/IL7R
GO:0032206	GO:0032206	positive regulation of telomere maintenance	44	-0.611082756729916	-1.88688980498812	0.000961869624022028	0.0140880959178678	0.0113510324484445	1590	tags=30%, list=11%, signal=26%	CCT6A/XRCC5/CCT8/GNL3/CCT3/DKC1/HNRNPA2B1/CCT5/CCT2/HNRNPD/HNRNPA1/AURKB/NEK2
GO:0060425	GO:0060425	lung morphogenesis	35	0.601609843880776	1.86636705479051	0.000968598073764198	0.0141478833397361	0.0113992042503397	2456	tags=43%, list=18%, signal=35%	RDH10/CTSH/LAMA1/SPRY1/WNT2/WNT2B/NOG/TGFBR2/FGF7/BMP4/CELSR1/YAP1/PLOD3/DAG1/LIF
GO:0006720	GO:0006720	isoprenoid metabolic process	78	0.477982562045453	1.72510354483465	0.000980274299150418	0.014279417992529	0.0115051840875477	1718	tags=27%, list=12%, signal=24%	LRP2/RARRES2/AKR1B1/RDH10/CYP26B1/APOB/AKR1B10/DHRS3/NPC2/SCPEP1/SDC3/CYP1B1/AKR1C1/SDC1/RETSAT/GPC4/PHYH/TTR/LRP1/AGRN/LSS
GO:0006721	GO:0006721	terpenoid metabolic process	63	0.505585427559019	1.76242463672905	0.000983752016514432	0.0142911366312124	0.0115146260056552	1718	tags=30%, list=12%, signal=27%	LRP2/RARRES2/AKR1B1/RDH10/CYP26B1/APOB/AKR1B10/DHRS3/SCPEP1/SDC3/CYP1B1/AKR1C1/SDC1/RETSAT/GPC4/TTR/LRP1/AGRN/LSS
GO:0099537	GO:0099537	trans-synaptic signaling	369	0.3217747416939	1.41947525480799	0.0010102205838374	0.0146358787024248	0.0117923908973403	2042	tags=21%, list=15%, signal=19%	SLC1A2/PPFIA4/RGS4/PDE7B/PCDHB16/CLSTN2/SLC30A1/LGMN/PCDHB11/CCL2/NFATC4/CACNA1E/LRRK2/ATP2A2/TRPV1/DGKI/GLRB/SQSTM1/NPTX1/PCDHB14/GRIA1/NISCH/GABBR2/SLC12A7/PRKN/FYN/GABRE/SYT7/FCHSD2/COLQ/UNC119/KCNQ3/GRM3/TOR1A/PINK1/GPER1/P2RX4/NTF3/BCR/CHRM3/KCND2/KCNC4/SERPINE2/INSYN2A/MME/GLS/RAB3B/PCDHB13/SYNGR1/EGR3/SLC1A1/SNCAIP/P2RX7/ABR/MECP2/PTPRA/TSHZ3/SNAP25/SLC7A11/CDK5/OPHN1/CADPS/FMR1/F2R/LYNX1/…
GO:0031497	GO:0031497	chromatin assembly	133	-0.439771191930547	-1.63803417059787	0.00102505192633306	0.0148018131784013	0.0119260872912395	2801	tags=35%, list=20%, signal=29%	HP1BP3/NAP1L5/H3-3A/NAA60/ASF1A/NAP1L3/DNMT3A/NAP1L4/PPHLN1/CENPL/RBBP7/OIP5/CENPS/H3-3B/SUV39H1/IPO4/RBBP4/SET/DAXX/NASP/HAT1/TP53/TSPYL4/HMGB1/HELLS/HDAC1/CENPX/TET1/CENPO/DNMT1/CENPQ/CHAF1A/ITGB3BP/NPM1/MCM2/CENPW/CENPA/H4C3/CENPM/HMGB2/CENPI/CENPU/CENPK/CHAF1B/HJURP/CENPN/KNL1
GO:0010638	GO:0010638	positive regulation of organelle organization	483	-0.327323982730869	-1.40351128726895	0.00102721150190551	0.0148018131784013	0.0119260872912395	2268	tags=20%, list=16%, signal=18%	GMFG/NBN/KDM1A/HOXA13/RALB/TCP1/CNOT6/SEPTIN7/SMARCB1/SFPQ/SEPTIN9/TADA2A/PRKD1/SMC5/TSC1/MAP1B/CKAP5/CNOT2/WASF1/RPS6KA4/RHOA/NPM2/PPIF/GMFB/PMAIP1/YWHAZ/PYCARD/CDC42EP3/CCT6A/WDR1/YWHAE/ACTR2/XRCC5/CEP135/TP53/DRG1/RUVBL2/CCT8/FLNA/CDC23/DYNLL1/YWHAH/HAX1/MSN/GPSM2/CORO1B/GNL3/ARPC5/TET1/MAPK8/WDR61/TFDP1/CFL2/PFN1/CARMIL1/MLLT11/ARPC3/UBE2N/GTF2H2/LPAR1/ANXA1/NF2/CCT3/DKC1/HNRNPA2B1/DNMT1/PARK…
GO:0019369	GO:0019369	arachidonic acid metabolic process	22	0.678748453724234	1.90543623830307	0.00103044822497477	0.0148085382008471	0.0119315057628657	1143	tags=41%, list=8%, signal=38%	PTGES/PLA2G4A/PLA2G4C/EPHX1/CYP1B1/GPX4/CYP2U1/CBR1/GPX1
GO:0060135	GO:0060135	maternal process involved in female pregnancy	37	0.588266040616156	1.83831593962615	0.00105030697020983	0.0150534612942138	0.0121288447074887	1019	tags=24%, list=7%, signal=23%	STC1/AKR1B1/RGS2/BSG/PAM/ITGA3/SPP1/ANGPT2/VDR
GO:1901607	GO:1901607	alpha-amino acid biosynthetic process	51	-0.554645557733753	-1.77442136469308	0.0010618383418995	0.0151780421812694	0.0122292217704835	2156	tags=53%, list=15%, signal=45%	MTRR/CAD/AASDHPPT/SRR/ATP2B4/SHMT2/GOT2/MTAP/OAT/AASS/ADI1/ALDH18A1/PLOD2/MTHFD1/CPS1/CTH/SLC25A12/PYCR1/GGT1/GOT1/PARK7/SEPHS1/PHGDH/PSAT1/CBS/ASNS/DHFR
GO:0031109	GO:0031109	microtubule polymerization or depolymerization	90	-0.494073357659529	-1.73953792832713	0.00107213977388787	0.0152844246165455	0.012314936013331	1057	tags=18%, list=8%, signal=17%	ZNF207/MZT1/KIF24/MAP7D3/KIF18A/RPS3/MAPRE1/SKA2/STMN1/PSRC1/FBXO5/TPX2/KIF18B/SKA3/KIF2C/SKA1
GO:0090101	GO:0090101	negative regulation of transmembrane receptor protein serine/threonine kinase signaling pathway	94	0.45826931563892	1.7039812191715	0.00108998523352887	0.0154975028150141	0.0124866169529679	1651	tags=23%, list=12%, signal=21%	LRP2/FST/SPRY1/PMEPA1/ASPN/DKK1/SPRED3/ONECUT2/HTRA1/NOG/ZNF451/TGFBR2/CCN3/TGFB1/SFRP1/HIPK2/SKIL/GREM1/TGFBR1/TGFBR3/CD109/SMAD7
GO:0046034	GO:0046034	ATP metabolic process	265	-0.375332961112515	-1.5361228199977	0.00109633810936656	0.0155464815190282	0.012526079976345	2644	tags=33%, list=19%, signal=27%	STOML2/SDHAF2/TEFM/NDUFB1/COX7C/NDUFA4/GAPDH/COX2/COX10/NDUFA1/ATP5PD/NUP93/NDUFAF1/OGDH/SLC2A6/RAE1/ATP5MGL/NDUFB2/ATP5PF/MSH2/COX15/ATP5MF/VPS9D1/NUP88/NDUFA6/NUP85/ATP5F1D/COX6B1/PPIF/NDUFS5/NDUFS1/SEH1L/NDC1/SDHD/PID1/COX6C/PKM/UQCRQ/UQCC2/NDUFB7/ATP5MC3/ATP5F1E/ATP1B1/UQCRH/TP53/CYC1/PRKAA1/NUDT5/PGK1/TPI1/PFKP/UQCR10/UQCRC2/NUP155/SLC25A33/OLA1/SLC25A12/NDUFA12/ATP5MC2/NUP35/ENO1/NUP37/ATP5…
GO:0060571	GO:0060571	morphogenesis of an epithelial fold	12	0.795274931700211	1.90662649838309	0.00110933659112328	0.0156891889316006	0.0126410619072026	1147	tags=42%, list=8%, signal=38%	RDH10/WNT2/WNT2B/NOG/BMP4
GO:0010833	GO:0010833	telomere maintenance via telomere lengthening	69	-0.517001493049977	-1.74469232046564	0.00111826377437229	0.0157737154031511	0.0127091664066975	3004	tags=43%, list=21%, signal=34%	MAPK1/PTGES3/SLX4/MAPK3/CCT7/CCT4/HNRNPC/NAT10/RFC1/NEK7/HSP90AA1/GAR1/TCP1/HNRNPU/CCT6A/NOP10/XRCC5/CCT8/GNL3L/CCT3/DKC1/HNRNPA2B1/HSP90AB1/CCT5/PARP1/CCT2/HNRNPA1/RAD51/AURKB/NEK2
GO:0051785	GO:0051785	positive regulation of nuclear division	42	-0.601142318655305	-1.84527724073638	0.00113732508870818	0.0159684992066713	0.012866107223049	141	tags=14%, list=1%, signal=14%	CDC23/EGF/AURKA/RAD51AP1/NUSAP1/DLGAP5
GO:0048002	GO:0048002	antigen processing and presentation of peptide antigen	157	-0.427311887762149	-1.63556309556078	0.00113804680092439	0.0159684992066713	0.012866107223049	2183	tags=31%, list=16%, signal=26%	PSMA7/ABCB9/SEC23A/KIF2A/PSMD10/PSMD3/AP2B1/PSMC5/PSMC6/PSME3/PSMB4/PSMA1/PSME2/PYCARD/PSMB6/SAR1B/PSMA2/AP1S1/PSMD14/PSMD11/DYNLL1/SEC24D/PSMA6/PSMA3/PSMB5/PSMB3/PSMC2/CAPZB/PSMB7/CAPZA1/PSMC1/AP2S1/CTSV/PSMB1/PSMB9/PSMA5/PSMB2/KIF18A/PSMA4/ACTR1A/AP1M2/CENPE/KIF23/RACGAP1/KIF15/KIF11/KIF2C/KIF4A
GO:0048589	GO:0048589	developmental growth	416	0.309748127123788	1.37489840327239	0.00115916741123246	0.016173183030712	0.0130310246641214	1960	tags=21%, list=14%, signal=19%	FGF13/STC1/LEPR/ACVR1C/EREG/CSF1/RGS4/GDF15/GAS1/RGS2/LGMN/RDH10/KLF5/BCL11A/SPRY1/WNT2/TMEM38B/CDKN1A/PSAP/APOD/INSR/EVC/LAMB2/GSN/RUNX1/NINJ1/PRKN/EYS/NOG/GATA6/SEMA5A/SEMA3C/TGFBR2/VGLL4/TRPV2/CCN3/WDR11/CD81/SPP1/MACF1/ITGA4/SMO/PTK7/BMPR1B/KIF26B/ADM/SEMA6A/TSKU/SFRP1/ENO3/FGF7/SELENOM/DDR1/GPX1/BMP4/ITSN2/CTC1/BBS2/SOS1/SEMA4B/ADD1/PLEKHA1/CPQ/GPAT4/AKAP6/TGFBR1/CDK5/RNF157/MKKS/TGFBR3/SEMA…
GO:1904355	GO:1904355	positive regulation of telomere capping	13	-0.799776587051595	-1.94223682775376	0.00115928117150178	0.016173183030712	0.0130310246641214	452	tags=23%, list=3%, signal=22%	HNRNPD/AURKB/NEK2
GO:0035265	GO:0035265	organ growth	106	0.44008924836353	1.65877759031598	0.00116171011668414	0.016173183030712	0.0130310246641214	1938	tags=22%, list=14%, signal=19%	STC1/LEPR/RGS4/RGS2/WNT2/TMEM38B/PSAP/EVC/RUNX1/NOG/GATA6/TGFBR2/VGLL4/SMO/TSKU/FGF7/AKAP6/TGFBR1/TGFBR3/ACACB/HEG1/YAP1/LATS2
GO:0045005	GO:0045005	DNA-dependent DNA replication maintenance of fidelity	43	-0.60580024652909	-1.86509493542326	0.00117205190783616	0.0162747779202393	0.0131128814951896	2363	tags=42%, list=17%, signal=35%	ALYREF/SLFN11/CENPS/DONSON/NUCKS1/BLM/CENPX/FANCM/PCNA/TIMELESS/ZGRF1/EME1/ZRANB3/RAD51/DNA2/TRAIP/MMS22L/BRCA2
GO:0009206	GO:0009206	purine ribonucleoside triphosphate biosynthetic process	56	-0.541427375626214	-1.76043164967811	0.00118269546397452	0.0163800257782586	0.0131976815887203	2341	tags=50%, list=17%, signal=42%	ATPSCKMT/STOML2/COX2/ATP5PD/ATP5MGL/ATP5PF/ATP5MF/VPS9D1/ATP5F1D/PID1/PKM/ATP5MC3/ATP5F1E/NME2/SLC25A12/ATP5MC2/ENO1/ATP5F1C/NME7/ATP5PB/ATP5ME/ATP5F1A/ATP5MG/IMPDH2/PARP1/ATP5MC1/NME1/ATP5PO
GO:0016101	GO:0016101	diterpenoid metabolic process	55	0.533184749989015	1.80485909437071	0.00119540580940008	0.0165132802507826	0.0133050471156403	1677	tags=33%, list=12%, signal=29%	LRP2/RARRES2/AKR1B1/RDH10/CYP26B1/APOB/AKR1B10/DHRS3/SCPEP1/SDC3/CYP1B1/AKR1C1/SDC1/RETSAT/GPC4/TTR/LRP1/AGRN
GO:0031297	GO:0031297	replication fork processing	35	-0.628704673700146	-1.86439949546667	0.00121599079729091	0.0167543474286526	0.0134992792797461	1228	tags=37%, list=9%, signal=34%	NUCKS1/BLM/CENPX/FANCM/PCNA/ZGRF1/EME1/ZRANB3/RAD51/DNA2/TRAIP/MMS22L/BRCA2
GO:0060337	GO:0060337	type I interferon signaling pathway	69	0.49516708164969	1.7504055128744	0.00123226672434447	0.0168915330983219	0.0136098122429624	2704	tags=36%, list=19%, signal=29%	OAS1/MX1/IFI6/ISG15/HLA-E/IRF9/MX2/STAT2/STAT1/IRF1/MMP12/SP100/IRAK1/OAS2/IFI27/IP6K2/XAF1/IFITM3/TYK2/IFITM1/HLA-B/USP18/IFNAR2/YTHDF2/TBK1
GO:0071357	GO:0071357	cellular response to type I interferon	69	0.49516708164969	1.7504055128744	0.00123226672434447	0.0168915330983219	0.0136098122429624	2704	tags=36%, list=19%, signal=29%	OAS1/MX1/IFI6/ISG15/HLA-E/IRF9/MX2/STAT2/STAT1/IRF1/MMP12/SP100/IRAK1/OAS2/IFI27/IP6K2/XAF1/IFITM3/TYK2/IFITM1/HLA-B/USP18/IFNAR2/YTHDF2/TBK1
GO:2000193	GO:2000193	positive regulation of fatty acid transport	17	0.723644722445429	1.90424915006745	0.00124170168185076	0.0169304598775484	0.0136411762496166	975	tags=29%, list=7%, signal=27%	PTGES/FABP3/PLA2G4A/PLA2R1/P2RX4
GO:0051924	GO:0051924	regulation of calcium ion transport	141	0.400739069673372	1.56994993700041	0.00124439113251719	0.0169304598775484	0.0136411762496166	1647	tags=25%, list=12%, signal=22%	PDE4B/STC1/RGS4/SLC30A1/CCL2/TMC1/PRNP/BEST1/TMEM38B/FYN/GEM/TSPAN13/TRPV2/CACNA1C/WFS1/SLC9A1/NOS1AP/PLCG2/SARAF/GNB5/GPER1/P2RX4/PML/CEMIP/PSEN2/STAC/P2RX7/AKAP6/CDK5/EHD3/FMR1/F2R/TRPC1/CACNB4/ICAM1
GO:0003206	GO:0003206	cardiac chamber morphogenesis	81	0.475516591896433	1.7175689103282	0.00124566092786995	0.0169304598775484	0.0136411762496166	1699	tags=30%, list=12%, signal=26%	LRP2/MYL3/DHRS3/WNT2/TNNT2/BMP2/NOG/GATA6/SEMA3C/TGFBR2/SMO/TGFB1/FHL2/SMARCD3/BMP4/SOS1/SOX4/CPE/DLL4/DSP/TGFBR1/TGFBR3/SMAD7/HEG1
GO:1904668	GO:1904668	positive regulation of ubiquitin protein ligase activity	13	-0.797044533024156	-1.93560210496565	0.00124777425958737	0.0169304598775484	0.0136411762496166	515	tags=38%, list=4%, signal=37%	BTRC/UBE2S/PLK1/CDC20/UBE2C
GO:0009201	GO:0009201	ribonucleoside triphosphate biosynthetic process	62	-0.538629097386803	-1.77841382583308	0.00126902211911491	0.017175170250097	0.0138383438012477	2341	tags=45%, list=17%, signal=38%	COX2/ATP5PD/ATP5MGL/UCK2/ATP5PF/ATP5MF/VPS9D1/ATP5F1D/PID1/PKM/ATP5MC3/ATP5F1E/NME2/SLC25A12/CTPS1/ATP5MC2/ENO1/ATP5F1C/NME7/ATP5PB/ATP5ME/ATP5F1A/ATP5MG/IMPDH2/PARP1/ATP5MC1/NME1/ATP5PO
GO:0009314	GO:0009314	response to radiation	342	-0.347943675909941	-1.45748437597547	0.00127412621499763	0.0171857400394368	0.0138468600707613	1664	tags=18%, list=12%, signal=17%	XRCC4/CDC25A/NUCKS1/KARS1/FOS/METAP1/ZMPSTE24/XRCC5/NPHP1/TP53/TOPBP1/PRKAA1/RUVBL2/PTN/DYNLRB1/RAD9B/FECH/RPL26/BLM/DCLRE1C/EYA3/INO80/TP53I13/MAPK8/GTF2H2/CLK2/OGG1/NHEJ1/ANXA1/COPS3/SCARA3/PCNA/POLD3/INTS7/RRM1/PARP1/NPM1/RAD54B/VCAM1/EIF2S1/TRPC3/XRCC2/PTPRC/ZRANB3/RAD51/COL3A1/CXCL12/CHEK1/BRCA1/FEN1/FANCD2/CXCL10/GRIN2A/ASNS/MMP1/BRCA2/RAD51AP1/ADIRF/AURKB/RAD54L/DTL/PCLAF/PBK
GO:0009142	GO:0009142	nucleoside triphosphate biosynthetic process	71	-0.501296125412709	-1.68993285799987	0.00127623247206442	0.0171857400394368	0.0138468600707613	2774	tags=45%, list=20%, signal=36%	ATPSCKMT/STOML2/ADK/COX2/ATP5PD/ATP5MGL/UCK2/ATP5PF/ATP5MF/VPS9D1/ATP5F1D/PID1/PKM/ATP5MC3/ATP5F1E/NME2/SLC25A12/CTPS1/ATP5MC2/ENO1/ATP5F1C/NME7/ATP5PB/ATP5ME/ATP5F1A/ATP5MG/IMPDH2/PARP1/ATP5MC1/NME1/ATP5PO/TYMS
GO:0051255	GO:0051255	spindle midzone assembly	10	-0.829805536521398	-1.86819742691834	0.00128205065951798	0.0172150650080902	0.0138704877258167	193	tags=60%, list=1%, signal=59%	MLH1/KIF23/RACGAP1/PRC1/AURKB/KIF4A
GO:2000045	GO:2000045	regulation of G1/S transition of mitotic cell cycle	125	-0.432804974669488	-1.59707793124207	0.00128485053090685	0.0172150650080902	0.0138704877258167	2280	tags=30%, list=16%, signal=26%	TMEM14B/SLFN11/TRIAP1/CNOT6/APPL2/CHEK2/MDM4/CNOT9/CDKN2B/CTDSPL/CNOT2/PSME3/PSME2/CDK6/RPTOR/PCBP4/TP53/PRMT1/RPL26/INO80/TFDP1/PLRG1/ANXA1/PCNA/CDK2/CASP2/FHL1/CDKN2C/RBL1/EZH2/E2F7/AURKA/CCNB1/CDC6/GTSE1/CDC25C/CDK1/KIF14
GO:0006956	GO:0006956	complement activation	30	0.625072634346659	1.86807258941175	0.0012941975147369	0.0172969497844587	0.0139364637639563	1570	tags=40%, list=11%, signal=36%	C1S/SERPING1/MFAP4/CFH/C2/CD55/PROS1/CD81/C1RL/C1R/CD46/C4B
GO:0002495	GO:0002495	antigen processing and presentation of peptide antigen via MHC class II	78	-0.500965980842862	-1.72655151954823	0.00130121417695117	0.0173473590772593	0.0139770794384675	1604	tags=24%, list=11%, signal=22%	PYCARD/SAR1B/AP1S1/DYNLL1/SEC24D/CAPZB/CAPZA1/AP2S1/CTSV/KIF18A/ACTR1A/AP1M2/CENPE/KIF23/RACGAP1/KIF15/KIF11/KIF2C/KIF4A
GO:0006914	GO:0006914	autophagy	458	0.305374363783369	1.36562360617587	0.00130797406486064	0.0173509413169851	0.0139799657134903	3227	tags=29%, list=23%, signal=23%	CTSK/LEPR/KLHL3/NUPR1/PLK3/LRRK2/SQSTM1/PSAP/CTSA/PJVK/PACS2/QSOX1/PTPN22/RB1CC1/SPATA18/PRKN/TMEM150A/TPCN1/TSC2/NPC1/NHLRC1/FYCO1/TEX264/ATG16L2/SYNPO2/VPS39/SEC16B/ATP6V1A/TP53INP1/SOGA3/PINK1/SRPX/ERN1/TECPR2/DEPP1/AUP1/ATG101/MAP1LC3B2/CHMP2B/GPR137B/TMEM59/ATP6V0A1/EPG5/PRKAB1/DRAM1/GABARAPL1/CDK5/YOD1/RMC1/TAB3/TOMM20/DRAM2/TMEM41B/USP33/CDK5R1/PIP4K2B/ZFYVE1/PRKAA2/RUBCNL/WDR45B/ADPRH/DHR…
GO:0061919	GO:0061919	process utilizing autophagic mechanism	458	0.305374363783369	1.36562360617587	0.00130797406486064	0.0173509413169851	0.0139799657134903	3227	tags=29%, list=23%, signal=23%	CTSK/LEPR/KLHL3/NUPR1/PLK3/LRRK2/SQSTM1/PSAP/CTSA/PJVK/PACS2/QSOX1/PTPN22/RB1CC1/SPATA18/PRKN/TMEM150A/TPCN1/TSC2/NPC1/NHLRC1/FYCO1/TEX264/ATG16L2/SYNPO2/VPS39/SEC16B/ATP6V1A/TP53INP1/SOGA3/PINK1/SRPX/ERN1/TECPR2/DEPP1/AUP1/ATG101/MAP1LC3B2/CHMP2B/GPR137B/TMEM59/ATP6V0A1/EPG5/PRKAB1/DRAM1/GABARAPL1/CDK5/YOD1/RMC1/TAB3/TOMM20/DRAM2/TMEM41B/USP33/CDK5R1/PIP4K2B/ZFYVE1/PRKAA2/RUBCNL/WDR45B/ADPRH/DHR…
GO:0010959	GO:0010959	regulation of metal ion transport	144	0.399918425795188	1.57266766904878	0.00131422941931234	0.0173907685040687	0.0140120551949611	2072	tags=28%, list=15%, signal=24%	PDE4B/STC1/RGS4/SLC30A1/CCL2/TMC1/PRNP/BEST1/TMEM38B/FYN/GEM/TSPAN13/TRPV2/CACNA1C/WFS1/SLC9A1/NOS1AP/PLCG2/SARAF/GNB5/GPER1/P2RX4/PML/CEMIP/PSEN2/STAC/P2RX7/AKAP6/CDK5/EHD3/FMR1/F2R/TRPC1/CACNB4/ICAM1/ATP1B3/TRPV3/PLCG1/STIM2/EPB41
GO:0007601	GO:0007601	visual perception	94	0.453677668446252	1.6869081132175	0.0013752075718611	0.0181080287664272	0.014589964698096	1650	tags=26%, list=12%, signal=23%	TGFBI/EFEMP1/HMCN1/RDH10/ADGRV1/DHRS3/BEST1/GLRB/EPAS1/LAMB2/EYS/CRB1/WFS1/UNC119/PRPH2/CYP1B1/PDE6B/BBS2/LUM/DLL4/PDE6D/MKKS/DRAM2/HPS1
GO:0050953	GO:0050953	sensory perception of light stimulus	94	0.453677668446252	1.6869081132175	0.0013752075718611	0.0181080287664272	0.014589964698096	1650	tags=26%, list=12%, signal=23%	TGFBI/EFEMP1/HMCN1/RDH10/ADGRV1/DHRS3/BEST1/GLRB/EPAS1/LAMB2/EYS/CRB1/WFS1/UNC119/PRPH2/CYP1B1/PDE6B/BBS2/LUM/DLL4/PDE6D/MKKS/DRAM2/HPS1
GO:1902036	GO:1902036	regulation of hematopoietic stem cell differentiation	65	-0.518911859060674	-1.72872926718606	0.00139662423973785	0.018344848121962	0.014780774315291	2183	tags=42%, list=16%, signal=35%	PSMA7/PSMD10/PSMD3/PSMC5/PUS7/PSMC6/PSME3/PSMB4/PSMA1/PSME2/PSMB6/PSMA2/PSMD14/PSMD11/PSMA6/PSMA3/PSMB5/PSMB3/PSMC2/PSMB7/PSMC1/PSMB1/PSMB9/PSMA5/PSMB2/MYB/PSMA4
GO:0043620	GO:0043620	regulation of DNA-templated transcription in response to stress	104	-0.460860710370579	-1.67353059777819	0.00141109169137655	0.0184458729418443	0.0148621718309856	2330	tags=38%, list=17%, signal=32%	ATF6/HSPA5/PSMA7/HIGD1A/PSMD10/UBB/PSMD3/PSMC5/CREBBP/PSMC6/PSME3/PSMB4/PSMA1/PSME2/PSMB6/PSMA2/TP53/CITED2/PSMD14/PSMD11/PSMA6/PSMA3/PSMB5/BCLAF1/PSMB3/PSMC2/PSMB7/INO80/HIF3A/PSMC1/UBA52/RBX1/PSMB1/PSMB9/PSMA5/PSMB2/RPS27A/PSMA4/CHEK1
GO:0030510	GO:0030510	regulation of BMP signaling pathway	62	0.49722542461747	1.72947712187731	0.00141121624265138	0.0184458729418443	0.0148621718309856	1833	tags=24%, list=13%, signal=21%	PCSK6/LRP2/SFRP4/FST/HTRA1/NOG/ITGA3/SFRP1/HIPK2/BMP4/SKIL/GREM1/SMAD7/PELO/SMURF1
GO:0014047	GO:0014047	glutamate secretion	19	0.707795291383983	1.92253882277155	0.00142842045086901	0.0186252090984042	0.0150066662001437	1453	tags=32%, list=10%, signal=28%	SLC1A2/PPFIA4/GLS/SLC1A1/SLC38A2/SNAP25
GO:0007600	GO:0007600	sensory perception	266	0.343931202530739	1.45742365249769	0.00143696449627368	0.0186391046443415	0.0150178620916072	1750	tags=21%, list=12%, signal=18%	CD36/LRP2/TGFBI/PTGES/EFEMP1/HMCN1/RDH10/CCL2/TMC1/ADGRV1/TRPV1/DHRS3/BEST1/GLRB/USP53/ANO1/EPAS1/PJVK/LAMB2/EYS/FYN/CRB1/TRPV2/CCN3/HEXB/WFS1/UNC119/PRPH2/SLC9A1/CYP1B1/PDE6B/PGAP1/P2RX4/ZNF354A/KCND2/CEMIP/SERPINE2/GPX1/MME/BBS2/TRIOBP/P2RX7/MECP2/LUM/DLL4/CDK5/PDE6D/MKKS/F2R/DRAM2/UBR3/ICAM1/HPS1/MYO6/HOXA1
GO:2001020	GO:2001020	regulation of response to DNA damage stimulus	197	-0.392135128928563	-1.55112811793113	0.00143735770163395	0.0186391046443415	0.0150178620916072	2236	tags=26%, list=16%, signal=22%	KDM1A/OTUB1/NSMCE1/TRIAP1/POLH/PSMD10/CHEK2/ERCC8/DEK/SHLD2/PMAIP1/TWIST1/CGAS/ZMPSTE24/ACTR2/PIAS4/ANKRD1/TP53/HMGB1/RPL26/TAF9/BCLAF1/EYA3/UBE2N/UBE2V2/OGG1/PCNA/AUNIP/TIMELESS/TAF9B/PARP1/KMT5A/PARPBP/PPP4R2/RPS3/BCL2L12/EEF1E1/FANCB/SHLD1/RMI2/RAD51/DDX39B/CXCL12/CHEK1/BRCA1/WDR76/FBXO5/DDIAS/POLQ/FOXM1/RAD51AP1
GO:0001568	GO:0001568	blood vessel development	479	0.300694306521634	1.35356251215034	0.00143994579463394	0.0186391046443415	0.0150178620916072	1953	tags=21%, list=14%, signal=19%	CHI3L1/LRP2/ANGPTL4/TGFBI/LEPR/SAT1/EREG/MMP2/ITGB8/HDAC9/JCAD/GPNMB/CTSH/ANGPTL2/CCL2/NFATC4/LAMA1/APOB/XDH/ANGPT1/KLF5/PLXDC1/WNT2/BSG/COL8A2/APOD/EPAS1/ANTXR1/RUNX1/SCG2/NOG/GATA6/SEMA5A/SEMA3C/CCN2/TGFBR2/TIPARP/EFEMP2/GRN/CCN3/VASH1/LOX/STAT1/SMO/TGFB1/PTK7/CYP1B1/FAP/ANGPT2/ADM/SP100/MFGE8/RIN2/SEMA6A/GPER1/PML/SFRP1/GPLD1/ZNF304/EMC10/HIPK2/PRCP/GPX1/BMP4/SOS1/GADD45A/GREM1/EGR3/SLC1A1/SOX…
GO:0070317	GO:0070317	negative regulation of G0 to G1 transition	35	-0.62428689143613	-1.85129873231242	0.00144343869864822	0.0186391866738488	0.0150179281842576	405	tags=37%, list=3%, signal=36%	RBBP8/PHC3/RBBP7/EHMT1/RBBP4/TFDP1/CBX5/RAD51/CHEK1/BRCA1/CDC7/EZH2/RRM2
GO:2000243	GO:2000243	positive regulation of reproductive process	41	-0.600904112371194	-1.83846926411388	0.00146093471237442	0.0188196553550691	0.0151633350489186	1738	tags=29%, list=12%, signal=26%	NPM2/PDE3A/CDC25A/WT1/CITED2/CDC25B/OXTR/POMZP3/C1QBP/AURKA/RAD51AP1/CDC25C
GO:1904356	GO:1904356	regulation of telomere maintenance via telomere lengthening	53	-0.539470054733037	-1.74502328229371	0.00148230566458621	0.0190306851153526	0.0153333655250405	1590	tags=25%, list=11%, signal=22%	CCT6A/XRCC5/CCT8/GNL3L/CCT3/DKC1/HNRNPA2B1/CCT5/PARP1/CCT2/HNRNPA1/AURKB/NEK2
GO:0032892	GO:0032892	positive regulation of organic acid transport	19	0.706260005431812	1.91836862429321	0.00148443615658475	0.0190306851153526	0.0153333655250405	975	tags=26%, list=7%, signal=25%	PTGES/FABP3/PLA2G4A/PLA2R1/P2RX4
GO:0003208	GO:0003208	cardiac ventricle morphogenesis	43	0.558104911120494	1.81808967661212	0.00149899228605799	0.0191713223953732	0.0154466795128413	1699	tags=37%, list=12%, signal=33%	LRP2/MYL3/TNNT2/NOG/SEMA3C/TGFBR2/TGFB1/SMARCD3/SOX4/CPE/DLL4/DSP/TGFBR1/TGFBR3/SMAD7/HEG1
GO:1900024	GO:1900024	regulation of substrate adhesion-dependent cell spreading	51	-0.545316861595431	-1.7445770118415	0.00152800256881714	0.0194957081930702	0.0157080429885686	1288	tags=31%, list=9%, signal=29%	LIMS1/FLNA/EFNA5/CARMIL1/CORO1C/C1QBP/FERMT2/CDC42/ACTN4/GBP1/PREX1/FGG/FGB/S100A10/HAS2/POSTN
GO:1903313	GO:1903313	positive regulation of mRNA metabolic process	71	-0.498379875532716	-1.68010180955465	0.00155404788344408	0.0197808094878382	0.015937754233216	1979	tags=30%, list=14%, signal=26%	DAZAP1/THRAP3/PNPT1/NCBP1/TARDBP/ZFP36/TRA2A/POLR2G/LEO1/SF3B4/PRDX6/PRR5L/RBMX/RBMXL1/HSPA8/NCL/HNRNPR/HNRNPD/TRA2B/RBM3/CCNB1
GO:0008611	GO:0008611	ether lipid biosynthetic process	10	0.810886158551219	1.84229498344672	0.00157036342683886	0.0197999124525484	0.0159531458357115	1080	tags=40%, list=8%, signal=37%	FASN/PLA2G4A/PLA2G4C/LPCAT2
GO:0046504	GO:0046504	glycerol ether biosynthetic process	10	0.810886158551219	1.84229498344672	0.00157036342683886	0.0197999124525484	0.0159531458357115	1080	tags=40%, list=8%, signal=37%	FASN/PLA2G4A/PLA2G4C/LPCAT2
GO:0097384	GO:0097384	cellular lipid biosynthetic process	10	0.810886158551219	1.84229498344672	0.00157036342683886	0.0197999124525484	0.0159531458357115	1080	tags=40%, list=8%, signal=37%	FASN/PLA2G4A/PLA2G4C/LPCAT2
GO:1901503	GO:1901503	ether biosynthetic process	10	0.810886158551219	1.84229498344672	0.00157036342683886	0.0197999124525484	0.0159531458357115	1080	tags=40%, list=8%, signal=37%	FASN/PLA2G4A/PLA2G4C/LPCAT2
GO:0061138	GO:0061138	morphogenesis of a branching epithelium	121	0.411375575238122	1.58715367518066	0.00159667942380109	0.0200787111535856	0.0161777789671515	1927	tags=24%, list=14%, signal=21%	AGT/CSF1/RDH10/CTSH/NFATC4/LAMA1/SPRY1/WNT2/WNT2B/BMP2/NOG/TGM2/SEMA3C/TGFBR2/SMO/ADM/PML/SFRP1/FGF7/DDR1/BMP4/CELSR1/GREM1/DLL4/FEM1B/HOXA11/CTNNBIP1/YAP1/VEGFA
GO:0072080	GO:0072080	nephron tubule development	53	0.515311563289601	1.73243287351921	0.00159998708406799	0.0200787111535856	0.0161777789671515	2999	tags=43%, list=21%, signal=34%	AGT/KLHL3/WNT2B/BMP2/NOG/STAT1/SMO/AQP11/KIF26B/BMP4/GREM1/HOXA11/CTNNBIP1/YAP1/VEGFA/HEYL/PKD2/LIF/AHI1/HOXD11/GZF1/PBX1/FGF2
GO:0040020	GO:0040020	regulation of meiotic nuclear division	17	-0.741363147030381	-1.87636524958359	0.00162368924058851	0.0203284371901315	0.0163789877295407	194	tags=35%, list=1%, signal=35%	NPM2/PDE3A/FBXO5/TRIP13/RAD51AP1/CDC20
GO:0006066	GO:0006066	alcohol metabolic process	255	0.343416769021748	1.46264796441814	0.00164980348341876	0.0205705513751357	0.0165740634861392	2569	tags=27%, list=18%, signal=23%	PLCH1/FASN/LEPR/MOXD1/AKR1B1/ASAH1/CYP27A1/RDH10/PLA2G4A/APOB/PLPP2/AKR1B10/DHRS3/GK/SMPD1/BMP2/PCSK9/VLDLR/NPC1/NPC2/NFE2L1/PLPP1/LCAT/PCBD1/CYP1B1/MBTPS1/PLCG2/DHCR7/AKR1C1/GPER1/SLC5A3/TSKU/CHKA/RETSAT/DKK3/MECP2/CYP51A1/TTR/PIP4P1/ACACB/AKR1C2/LSS/PRKAA2/GDPD1/PLPP3/ITPKB/FMO5/IP6K1/GDE1/PLCG1/GPAM/IP6K2/LDLRAP1/APOL1/LDLR/TM7SF2/GDPD3/ALDH3A2/SPHK1/INSIG2/ACSS2/QDPR/SYNJ1/ACADVL/CYP39A1/AKR1…
GO:0072507	GO:0072507	divalent inorganic cation homeostasis	266	0.341089109214354	1.44538015661413	0.00165072325849854	0.0205705513751357	0.0165740634861392	2642	tags=25%, list=19%, signal=21%	CCL7/FAM20A/CD36/STC1/TMEM178A/MT2A/CXCR6/SLC30A1/ATP2A2/PRNP/PTGER3/TRPV1/TMEM38B/PTGIR/GRIA1/ACKR4/PACS2/PRKN/TPCN1/TGM2/FYN/CD55/GPR18/TRPV2/CACNA1C/HEXB/WFS1/PLCG2/ADM/GPER1/P2RX4/PML/CEMIP/C1QTNF1/MT1X/F2RL2/SLC1A1/P2RX7/AKAP6/CDK5/F2R/TRPC1/ERO1A/LRP1/PDGFRA/RASA3/CD40/PDZD8/TRPV3/PLCG1/ITGAV/STIM2/ACKR3/CLN3/TRPM7/GSTO1/SLC24A1/PKD2/SLC25A23/SLC41A1/JSRP1/CAMK2N1/VAPB/PRKCE/BNIP3/SLC35G1/A…
GO:0000132	GO:0000132	establishment of mitotic spindle orientation	24	-0.682282574095581	-1.87851496352801	0.00165822881470754	0.0206160261475035	0.0166107033287228	1413	tags=33%, list=10%, signal=30%	PAFAH1B1/DYNLT1/GPSM2/CENPA/MAD2L1/SPDL1/PLK1/NDC80
GO:0061952	GO:0061952	midbody abscission	15	-0.762158094943602	-1.88285392344716	0.00166610940355762	0.0206659416970279	0.0166509211853896	23	tags=27%, list=0%, signal=27%	MITD1/CHMP4A/CEP55/KIF20A
GO:0048026	GO:0048026	positive regulation of mRNA splicing, via spliceosome	18	-0.735117953064785	-1.90033275888573	0.00169024095398761	0.0209167318055966	0.0168529872897595	1979	tags=72%, list=14%, signal=62%	SNW1/DAZAP1/THRAP3/NCBP1/TRA2A/SF3B4/PRDX6/RBMX/RBMXL1/HSPA8/NCL/TRA2B/RBM3
GO:0006334	GO:0006334	nucleosome assembly	89	-0.496425558355716	-1.748434926238	0.0016980882802419	0.0209653116539796	0.0168921289479758	717	tags=43%, list=5%, signal=41%	HP1BP3/NAP1L5/H3-3A/NAA60/ASF1A/NAP1L3/NAP1L4/CENPL/RBBP7/OIP5/CENPS/H3-3B/IPO4/RBBP4/SET/DAXX/NASP/HAT1/TSPYL4/CENPX/CENPO/CENPQ/CHAF1A/ITGB3BP/NPM1/MCM2/CENPW/CENPA/H4C3/CENPM/HMGB2/CENPI/CENPU/CENPK/CHAF1B/HJURP/CENPN/KNL1
GO:0010458	GO:0010458	exit from mitosis	26	-0.669839553656548	-1.8787183325401	0.00170914085162782	0.0210473924754379	0.0169582629431728	1261	tags=31%, list=9%, signal=28%	NPM2/CDC23/RPL24/KNTC1/UBE2S/CDCA5/UBE2C/ANLN
GO:1901976	GO:1901976	regulation of cell cycle checkpoint	30	-0.644101940349006	-1.87763687764383	0.00171261049884315	0.0210473924754379	0.0169582629431728	671	tags=20%, list=5%, signal=19%	ANAPC15/DDX39B/WDR76/MAD2L1/CCNB1/NDC80
GO:0010499	GO:0010499	proteasomal ubiquitin-independent protein catabolic process	20	-0.717583399647499	-1.88217548395488	0.00172351341371177	0.0211328043800531	0.0170270808520246	1640	tags=75%, list=12%, signal=66%	PSMA7/PSMB4/PSMA1/PSMB6/PSMA2/PSMA6/PSMA3/PSMB5/PSMB3/PSMB7/PSMB1/PSMB9/PSMA5/PSMB2/PSMA4
GO:0010569	GO:0010569	regulation of double-strand break repair via homologous recombination	42	-0.591924990631382	-1.8169835653535	0.00176240980600863	0.0215110566733383	0.0173318455327742	678	tags=26%, list=5%, signal=25%	TIMELESS/PARP1/PARPBP/PPP4R2/FANCB/SHLD1/RMI2/RAD51/CHEK1/POLQ/RAD51AP1
GO:0046605	GO:0046605	regulation of centrosome cycle	42	-0.590983021613048	-1.81409208036389	0.00176240980600863	0.0215110566733383	0.0173318455327742	510	tags=17%, list=4%, signal=16%	NPM1/STIL/RBM14/CCNF/BRCA1/AURKA/PLK4
GO:0051307	GO:0051307	meiotic chromosome separation	17	-0.738584605691521	-1.86933285468555	0.00182104183477996	0.0221760584253614	0.0178676494135466	1390	tags=41%, list=10%, signal=37%	MLH1/CENPX/FANCM/EME1/RMI1/TOP2A/TTK
GO:0002504	GO:0002504	antigen processing and presentation of peptide or polysaccharide antigen via MHC class II	79	-0.496231487732602	-1.71303793639334	0.00182899992827377	0.0222223491285263	0.017904946666259	1604	tags=24%, list=11%, signal=21%	PYCARD/SAR1B/AP1S1/DYNLL1/SEC24D/CAPZB/CAPZA1/AP2S1/CTSV/KIF18A/ACTR1A/AP1M2/CENPE/KIF23/RACGAP1/KIF15/KIF11/KIF2C/KIF4A
GO:0006282	GO:0006282	regulation of DNA repair	114	-0.447251727307273	-1.635819078562	0.00184593907023197	0.0223484347909861	0.0180065361538809	2386	tags=28%, list=17%, signal=23%	UBE2V1/BRCC3/KDM1A/OTUB1/POLH/ERCC8/DEK/SHLD2/TWIST1/CGAS/ACTR2/HMGB1/EYA3/UBE2N/UBE2V2/OGG1/PCNA/AUNIP/TIMELESS/PARP1/PARPBP/PPP4R2/RPS3/FANCB/SHLD1/RMI2/RAD51/CHEK1/BRCA1/POLQ/FOXM1/RAD51AP1
GO:0031214	GO:0031214	biomineral tissue development	89	0.460398622960566	1.696148698455	0.00184773815518441	0.0223484347909861	0.0180065361538809	1320	tags=22%, list=9%, signal=20%	FAM20A/PTHLH/MGP/ISG15/ADGRV1/TMEM38B/ASPN/BMP2/KLF10/ANKH/LOX/SPP1/TGFB1/BMPR1B/CEBPB/GPM6B/GAS6/BMP4/GREM1/P2RX7
GO:0061842	GO:0061842	microtubule organizing center localization	29	-0.656507592205552	-1.89399686205423	0.00185655548274871	0.022404391897911	0.0180516218020856	1239	tags=24%, list=9%, signal=22%	EZR/INTS13/GPSM2/ARPC5/MAD2L1/AURKA/DLGAP5
GO:0046621	GO:0046621	negative regulation of organ growth	24	0.663891029955579	1.89857329635603	0.00186648257248602	0.0224606760697031	0.0180969709723403	649	tags=21%, list=5%, signal=20%	RGS4/RGS2/NOG/TGFBR2/VGLL4
GO:0031124	GO:0031124	mRNA 3'-end processing	96	-0.474782199045799	-1.69030190638858	0.0018696223065877	0.0224606760697031	0.0180969709723403	2099	tags=27%, list=15%, signal=23%	PABPN1/SNRPA/PAPOLG/PNPT1/CSTF1/NCBP1/SRRM1/SLBP/EIF4A3/SRSF2/LEO1/SARNP/RBM8A/MAGOHB/THOC7/CPSF6/SRSF3/WDR33/MAGOH/SRSF7/DDX39A/SRSF1/CSTF3/DDX39B/BARD1/CCNB1
GO:0051294	GO:0051294	establishment of spindle orientation	26	-0.667886905501444	-1.87324168389197	0.00188495403697813	0.0225940903176796	0.0182044652332181	1413	tags=31%, list=10%, signal=28%	PAFAH1B1/DYNLT1/GPSM2/CENPA/MAD2L1/SPDL1/PLK1/NDC80
GO:2000736	GO:2000736	regulation of stem cell differentiation	91	-0.465975045990246	-1.64700453144145	0.00189637456395415	0.022680130691049	0.0182737895106568	2187	tags=36%, list=16%, signal=31%	HNRNPU/PSMA7/PSMD10/PSMD3/PSMC5/PUS7/PSMC6/PSME3/PWP1/PSMB4/PSMA1/PSME2/TRIM6/PSMB6/PSMA2/PTN/PSMD14/PSMD11/PSMA6/JAG1/PSMA3/PSMB5/PSMB3/PSMC2/PSMB7/PSMC1/HES1/PSMB1/PSMB9/PSMA5/PSMB2/MYB/PSMA4
GO:0030330	GO:0030330	DNA damage response, signal transduction by p53 class mediator	96	-0.474016756985865	-1.68757680806827	0.00190330829179311	0.0227122458212633	0.018299665249101	2244	tags=33%, list=16%, signal=28%	NBN/KDM1A/TRIAP1/CNOT6/PSMD10/CHEK2/MDM4/CNOT9/CNOT2/PMAIP1/TWIST1/ZMPSTE24/ANKRD1/PCBP4/TP53/PRMT1/RPL26/TFDP1/PCNA/CDK2/CASP2/KMT5A/EEF1E1/BRCA1/E2F7/AURKA/BRCA2/FOXM1/CCNB1/GTSE1/CDC25C/CDK1
GO:0085029	GO:0085029	extracellular matrix assembly	34	0.590064018162374	1.81927566843252	0.00191730062052785	0.0228282608404051	0.0183931406381431	1133	tags=32%, list=8%, signal=30%	AGT/MFAP4/LAMB2/ANTXR1/QSOX1/EFEMP2/LOX/TGFB1/GPM6B/GAS6/FBLN5
GO:0060441	GO:0060441	epithelial tube branching involved in lung morphogenesis	18	0.705742030245877	1.87825459683072	0.00192262887928215	0.0228408310858719	0.0184032687111638	1271	tags=44%, list=9%, signal=40%	RDH10/CTSH/LAMA1/SPRY1/WNT2/WNT2B/BMP4/CELSR1
GO:0097242	GO:0097242	amyloid-beta clearance	26	0.630989861364296	1.84293023360384	0.00194269807426421	0.02302807961201	0.0185541382189034	2557	tags=50%, list=18%, signal=41%	CD36/LRP2/LRPAP1/INSR/MSR1/MME/CYP51A1/LRP1/LDLR/ABCA7/IFNGR1/CLU/IGF1R
GO:0009145	GO:0009145	purine nucleoside triphosphate biosynthetic process	57	-0.542864612429644	-1.7746539638894	0.0019916087932933	0.0234873335769064	0.0189241674043951	2774	tags=51%, list=20%, signal=41%	ATPSCKMT/STOML2/ADK/COX2/ATP5PD/ATP5MGL/ATP5PF/ATP5MF/VPS9D1/ATP5F1D/PID1/PKM/ATP5MC3/ATP5F1E/NME2/SLC25A12/ATP5MC2/ENO1/ATP5F1C/NME7/ATP5PB/ATP5ME/ATP5F1A/ATP5MG/IMPDH2/PARP1/ATP5MC1/NME1/ATP5PO
GO:0030001	GO:0030001	metal ion transport	286	0.338360385713021	1.45728925096163	0.00200050236091657	0.0234873335769064	0.0189241674043951	2460	tags=24%, list=18%, signal=21%	SLC40A1/LRP2/PDE4B/CATSPER2/STC1/KCNJ2/RGS4/SLC30A1/CCL2/CACNA1E/ATP2A2/TMC1/PRNP/TRPV1/BEST1/TMEM38B/KCNT2/NIPAL2/TPCN1/FYN/CCN2/GEM/TSPAN13/TRPV2/CACNA1C/SLC3A2/WFS1/SLC9A1/SLC39A3/NOS1AP/CACHD1/PLCG2/SARAF/GNB5/GPER1/P2RX4/PML/CEMIP/GAS6/PSEN2/STAC/P2RX7/AKAP6/CDK5/SPG7/EHD3/FMR1/F2R/TRPC1/CACNB4/ICAM1/ERO1A/ATP1B3/NIPA1/RASA3/TRPV3/PLCG1/ITGAV/STIM2/EPB41/PKD1L2/CUL5/TRPM7/GSTO1/SLC24A1/ORAI3…
GO:0043588	GO:0043588	skin development	166	0.379297434350152	1.51482614095786	0.00200411884526746	0.0234873335769064	0.0189241674043951	1442	tags=17%, list=10%, signal=16%	PCSK6/CTSK/KRTAP3-3/EREG/KRT33B/KRT38/ASAH1/FST/CYP26B1/KRT23/KRTAP1-5/EXPH5/PERP/RUNX1/GATA6/CTSL/ITGA3/SMO/KRT40/KRTAP3-1/FZD3/GRHL1/BCR/VDR/FGF7/SOS1/NCOA3/ERRFI1/DSP
GO:0051028	GO:0051028	mRNA transport	138	-0.42586368334546	-1.60012861010904	0.00200638885635013	0.0234873335769064	0.0189241674043951	3625	tags=43%, list=26%, signal=33%	POLDIP3/LRPPRC/AGFG1/SUPT6H/NUP153/SRSF6/NUP107/GLE1/NUP205/SRSF4/QKI/POLR2D/MYO1C/CHTOP/SRSF9/NXT2/AHCTF1/UPF3B/CPSF3/PARP11/ALYREF/XPO1/DDX19B/HNRNPA1L2/NUP93/RAE1/PABPN1/NUP88/FYTTD1/NUP85/NCBP1/SEH1L/ZFP36/NDC1/SRRM1/CETN3/NXT1/SLBP/EIF4A3/SRSF2/NUP155/NUP35/EIF5AL1/SARNP/NUP37/ENY2/EIF4E/RBM8A/MAGOHB/THOC7/HNRNPA2B1/SRSF3/WDR33/MAGOH/SRSF7/NUTF2/HNRNPA1/DDX39A/SRSF1/DDX39B
GO:0055022	GO:0055022	negative regulation of cardiac muscle tissue growth	19	0.697397985097737	1.89429728848772	0.00200780236525369	0.0234873335769064	0.0189241674043951	649	tags=26%, list=5%, signal=25%	RGS4/RGS2/NOG/TGFBR2/VGLL4
GO:0061117	GO:0061117	negative regulation of heart growth	19	0.697397985097737	1.89429728848772	0.00200780236525369	0.0234873335769064	0.0189241674043951	649	tags=26%, list=5%, signal=25%	RGS4/RGS2/NOG/TGFBR2/VGLL4
GO:0048645	GO:0048645	animal organ formation	40	0.55644249211909	1.77304085397724	0.00207107344819236	0.0241745822140532	0.0194778960009265	1147	tags=30%, list=8%, signal=28%	LRP2/RDH10/SPRY1/WNT2/WNT2B/DKK1/BMP2/NOG/GATA6/TGFBR2/SMARCD3/BMP4
GO:0031663	GO:0031663	lipopolysaccharide-mediated signaling pathway	39	0.572414115592554	1.80498064192044	0.00208044033533017	0.0242310109644337	0.0195233616607523	1030	tags=23%, list=7%, signal=21%	CD36/CD14/CCL2/PTPN22/CD55/TGFB1/IRAK1/LY96/TLR4
GO:0051642	GO:0051642	centrosome localization	28	-0.645342064981133	-1.84458131528454	0.00215445042690228	0.0250317363191716	0.0201685204910804	1239	tags=21%, list=9%, signal=20%	EZR/INTS13/GPSM2/MAD2L1/AURKA/DLGAP5
GO:0021545	GO:0021545	cranial nerve development	25	-0.657175962243621	-1.83072746454053	0.00215855414200114	0.0250317363191716	0.0201685204910804	1042	tags=28%, list=7%, signal=26%	RPL24/HES1/LPAR1/TMEM126A/ERBB3/TFAP2A/TCIRG1
GO:0046486	GO:0046486	glycerolipid metabolic process	312	0.324621242593816	1.39795811335273	0.00217073355147745	0.0251184882385247	0.0202384180739251	2575	tags=26%, list=18%, signal=22%	LIPG/FABP3/PLA2G4A/APOB/DGKI/FABP4/PLA2G4C/GK/PIK3R1/PCSK9/TMEM150A/OSBPL10/PLBD1/SERINC2/LCAT/PTDSS1/PIGT/PTDSS2/OSBPL8/ABHD16A/PLCG2/PTPN13/PGAP1/MPPE1/GPLD1/PI4K2A/ABHD4/CHKA/LPCAT2/PLD6/PGS1/GPX1/PTPMT1/VAC14/PLD2/ACP6/SLC27A1/MTMR10/PLEKHA1/MECP2/PIK3R3/GPAT4/PLA2G15/PIP4P1/PIGZ/LPCAT4/SLC22A4/PISD/SLC44A3/PIP4K2B/DGKE/GDPD1/FBXW7/TTC7B/ITPKB/IP6K1/GDE1/LPIN2/PLCG1/GPAM/IP6K2/ABHD6/DGKA/LMF1…
GO:1902751	GO:1902751	positive regulation of cell cycle G2/M phase transition	27	-0.661310621615218	-1.87737107730165	0.00217706465698483	0.0251373383504123	0.0202536059483504	510	tags=44%, list=4%, signal=43%	RAD51B/CDC25A/RAD51C/CDC25B/NPM1/ATAD5/CDC7/FBXO5/CCNB1/DTL/CDC25C/CDK1
GO:0090231	GO:0090231	regulation of spindle checkpoint	14	-0.762682280746605	-1.86813994817762	0.00221049367283104	0.0253590111050531	0.020432211676586	671	tags=29%, list=5%, signal=27%	ANAPC15/MAD2L1/CCNB1/NDC80
GO:0090266	GO:0090266	regulation of mitotic cell cycle spindle assembly checkpoint	14	-0.762682280746605	-1.86813994817762	0.00221049367283104	0.0253590111050531	0.020432211676586	671	tags=29%, list=5%, signal=27%	ANAPC15/MAD2L1/CCNB1/NDC80
GO:1903504	GO:1903504	regulation of mitotic spindle checkpoint	14	-0.762682280746605	-1.86813994817762	0.00221049367283104	0.0253590111050531	0.020432211676586	671	tags=29%, list=5%, signal=27%	ANAPC15/MAD2L1/CCNB1/NDC80
GO:0055074	GO:0055074	calcium ion homeostasis	242	0.346385361434626	1.45362389248253	0.00222491834130567	0.025465044624259	0.0205176447914758	2642	tags=25%, list=19%, signal=21%	CCL7/FAM20A/CD36/STC1/TMEM178A/CXCR6/SLC30A1/ATP2A2/PRNP/PTGER3/TRPV1/TMEM38B/PTGIR/GRIA1/ACKR4/PACS2/TPCN1/TGM2/FYN/CD55/GPR18/TRPV2/CACNA1C/HEXB/WFS1/PLCG2/ADM/GPER1/P2RX4/PML/CEMIP/C1QTNF1/F2RL2/P2RX7/AKAP6/CDK5/F2R/TRPC1/ERO1A/LRP1/PDGFRA/RASA3/CD40/PDZD8/TRPV3/PLCG1/ITGAV/STIM2/ACKR3/CLN3/GSTO1/SLC24A1/PKD2/SLC25A23/JSRP1/CAMK2N1/VAPB/PRKCE/BNIP3/SLC35G1/APP
GO:0006406	GO:0006406	mRNA export from nucleus	107	-0.44992847873072	-1.63705038336847	0.00223402654859287	0.025465044624259	0.0205176447914758	3625	tags=44%, list=26%, signal=33%	POLDIP3/AGFG1/SUPT6H/NUP153/SRSF6/NUP107/GLE1/NUP205/SRSF4/POLR2D/CHTOP/SRSF9/UPF3B/CPSF3/ALYREF/DDX19B/NUP93/RAE1/PABPN1/NUP88/FYTTD1/NUP85/NCBP1/SEH1L/NDC1/SRRM1/NXT1/SLBP/EIF4A3/SRSF2/NUP155/NUP35/SARNP/NUP37/ENY2/EIF4E/RBM8A/MAGOHB/THOC7/HNRNPA2B1/SRSF3/WDR33/MAGOH/SRSF7/DDX39A/SRSF1/DDX39B
GO:0071427	GO:0071427	mRNA-containing ribonucleoprotein complex export from nucleus	107	-0.44992847873072	-1.63705038336847	0.00223402654859287	0.025465044624259	0.0205176447914758	3625	tags=44%, list=26%, signal=33%	POLDIP3/AGFG1/SUPT6H/NUP153/SRSF6/NUP107/GLE1/NUP205/SRSF4/POLR2D/CHTOP/SRSF9/UPF3B/CPSF3/ALYREF/DDX19B/NUP93/RAE1/PABPN1/NUP88/FYTTD1/NUP85/NCBP1/SEH1L/NDC1/SRRM1/NXT1/SLBP/EIF4A3/SRSF2/NUP155/NUP35/SARNP/NUP37/ENY2/EIF4E/RBM8A/MAGOHB/THOC7/HNRNPA2B1/SRSF3/WDR33/MAGOH/SRSF7/DDX39A/SRSF1/DDX39B
GO:0070252	GO:0070252	actin-mediated cell contraction	72	0.468945583748087	1.67527264520772	0.00224003356877809	0.0254791903376333	0.0205290422473459	829	tags=21%, list=6%, signal=20%	FGF13/PDE4B/MYH3/STC1/KCNJ2/MYL3/ATP2A2/TNNT2/TMOD1/ACTC1/GSN/CACNA1C/SLC9A1/NOS1AP/EPDR1
GO:0098662	GO:0098662	inorganic cation transmembrane transport	449	0.29946483200395	1.33560929236757	0.00226550755942241	0.0256666115759337	0.0206800509123833	2398	tags=24%, list=17%, signal=20%	KCNH6/SLC40A1/FGF13/PDE4B/CATSPER2/KCNJ2/RGS4/SLC4A11/SLC30A1/AMIGO1/CACNA1E/ISCU/ATP2A2/TMC1/PRNP/TRPV1/TMEM38B/SLC31A2/KCNT2/PCSK9/NIPAL2/SLC12A7/TPCN1/FYN/GEM/TSPAN13/TRPV2/CACNA1C/KCNMB3/SLC3A2/HVCN1/KCNQ3/ATP6AP1L/SLC9A1/SLC39A3/KCNJ14/NOS1AP/ATP6AP1/STOM/ATP6V1A/CACHD1/SLC6A16/SLC17A5/TCN2/SLC6A8/PLCG2/SLC9A7/GNB5/GPER1/P2RX4/KCND2/CEMIP/KCNC4/GAS6/ND5/KLHL24/KCNMB2/PSEN2/STAC/P2RX7/ATP6V0A…
GO:0043618	GO:0043618	regulation of transcription from RNA polymerase II promoter in response to stress	99	-0.461181759485149	-1.65652245948929	0.00226611310584376	0.0256666115759337	0.0206800509123833	2330	tags=38%, list=17%, signal=32%	ATF6/HSPA5/PSMA7/HIGD1A/PSMD10/UBB/PSMD3/PSMC5/CREBBP/PSMC6/PSME3/PSMB4/PSMA1/PSME2/PSMB6/PSMA2/TP53/CITED2/PSMD14/PSMD11/PSMA6/PSMA3/PSMB5/PSMB3/PSMC2/PSMB7/INO80/HIF3A/PSMC1/UBA52/RBX1/PSMB1/PSMB9/PSMA5/PSMB2/RPS27A/PSMA4/CHEK1
GO:0015732	GO:0015732	prostaglandin transport	10	0.803382902738843	1.82524794127331	0.00231701680956245	0.0261876783592408	0.0210998837982187	975	tags=40%, list=7%, signal=37%	PTGES/PLA2G4A/SLCO2A1/P2RX4
GO:0086003	GO:0086003	cardiac muscle cell contraction	48	0.525259004777883	1.753271960638	0.00232253052532865	0.0261946164312384	0.0211054739277034	826	tags=19%, list=6%, signal=18%	FGF13/PDE4B/STC1/KCNJ2/ATP2A2/GSN/CACNA1C/SLC9A1/NOS1AP
GO:1904353	GO:1904353	regulation of telomere capping	22	-0.682337948152938	-1.83999330333813	0.00232960528437709	0.0262190944216419	0.0211251962851436	452	tags=14%, list=3%, signal=13%	HNRNPD/AURKB/NEK2
GO:0006333	GO:0006333	chromatin assembly or disassembly	153	-0.419813558178013	-1.60234010254215	0.00233509763988136	0.0262256974428692	0.0211305164581922	2506	tags=34%, list=18%, signal=28%	HP1BP3/NAP1L5/H3-3A/NAA60/ASF1A/NAP1L3/DNMT3A/NAP1L4/PPHLN1/SUPT16H/CENPL/RBBP7/OIP5/CENPS/SMARCB1/H3-3B/SUV39H1/IPO4/RBBP4/SET/DAXX/NASP/HAT1/TP53/SMARCC1/TSPYL4/HMGB1/HELLS/HDAC1/SMARCE1/CENPX/TET1/CENPO/DNMT1/CENPQ/CHAF1A/ITGB3BP/NPM1/SUV39H2/MCM2/CENPW/CENPA/H4C3/CENPM/HMGB2/CENPI/CENPU/CENPK/CHAF1B/HJURP/CENPN/KNL1
GO:0110148	GO:0110148	biomineralization	90	0.444342615514289	1.64443694111908	0.00234850136934763	0.0263209398753301	0.021207255000266	1320	tags=22%, list=9%, signal=20%	FAM20A/PTHLH/MGP/ISG15/ADGRV1/TMEM38B/ASPN/BMP2/KLF10/ANKH/LOX/SPP1/TGFB1/BMPR1B/CEBPB/GPM6B/GAS6/BMP4/GREM1/P2RX7
GO:0044773	GO:0044773	mitotic DNA damage checkpoint	92	-0.466924306396665	-1.6566863394932	0.00235767266687773	0.0263614611218832	0.0212399036979436	2244	tags=33%, list=16%, signal=28%	NBN/TRIAP1/CNOT6/DONSON/MSH2/CHEK2/ATF2/MDM4/CNOT9/CNOT2/PCBP4/TP53/TOPBP1/RAD9B/PRMT1/RPL26/BLM/TFDP1/PCNA/CDK2/CASP2/EME1/FANCD2/E2F7/AURKA/CCNB1/GTSE1/CLSPN/CDC25C/CDK1
GO:0044818	GO:0044818	mitotic G2/M transition checkpoint	33	-0.622295241669162	-1.83774433830069	0.00236463628758971	0.0263614611218832	0.0212399036979436	242	tags=24%, list=2%, signal=24%	TOPBP1/BLM/CHEK1/BRCA1/CDC6/ORC1/CLSPN/CDK1
GO:0019915	GO:0019915	lipid storage	62	0.485306849348984	1.68802127060406	0.00236691008950691	0.0263614611218832	0.0212399036979436	2018	tags=26%, list=14%, signal=22%	CD36/ACVR1C/APOB/PLA2G4C/MSR1/HEXB/OSBPL8/GM2A/AUP1/PLIN2/BSCL2/ACACB/ZFYVE1/FBXW7/IL6/ITGAV
GO:0090189	GO:0090189	regulation of branching involved in ureteric bud morphogenesis	12	0.773640047432135	1.85475809163377	0.0023770395602206	0.0264192380227428	0.0212864555868753	1927	tags=58%, list=14%, signal=50%	AGT/WNT2B/NOG/SMO/BMP4/GREM1/VEGFA
GO:1905954	GO:1905954	positive regulation of lipid localization	66	0.489650204058615	1.72065827001261	0.00246082735800208	0.0272937407798322	0.0219910581981754	1982	tags=27%, list=14%, signal=24%	CD36/PTGES/LIPG/FABP3/PLA2G4A/APOB/MSR1/PLA2R1/SPP1/PLTP/P2RX4/C1QTNF1/TMEM30A/PLIN2/ACACB/LRP1/ABCB4/LDLRAP1
GO:0042276	GO:0042276	error-prone translesion synthesis	21	-0.707665708904321	-1.88073626864042	0.00247915580047639	0.0274400971208008	0.0221089801363177	873	tags=43%, list=6%, signal=40%	UBA52/PCNA/RPS27A/RFC5/RPA3/RFC2/RFC3/RFC4/POLE2
GO:0090183	GO:0090183	regulation of kidney development	17	0.70810017780798	1.86334415208168	0.00249566676086018	0.0275657737676829	0.0222102400727269	1273	tags=41%, list=9%, signal=37%	AGT/WNT2B/NOG/STAT1/SMO/BMP4/GREM1
GO:0006754	GO:0006754	ATP biosynthetic process	47	-0.552429057345009	-1.717583526489	0.00251759232451479	0.027750615601765	0.0223591704653597	2774	tags=51%, list=20%, signal=41%	ATPSCKMT/STOML2/COX2/ATP5PD/ATP5MGL/ATP5PF/ATP5MF/VPS9D1/ATP5F1D/PID1/PKM/ATP5MC3/ATP5F1E/SLC25A12/ATP5MC2/ENO1/ATP5F1C/ATP5PB/ATP5ME/ATP5F1A/ATP5MG/PARP1/ATP5MC1/ATP5PO
GO:0032204	GO:0032204	regulation of telomere maintenance	71	-0.488385018958711	-1.64640787960156	0.00253017101606818	0.02783188117675	0.0224246476017999	1590	tags=21%, list=11%, signal=19%	CCT6A/XRCC5/CCT8/GNL3L/GNL3/CCT3/DKC1/HNRNPA2B1/CCT5/PARP1/CCT2/HNRNPD/HNRNPA1/AURKB/NEK2
GO:0051347	GO:0051347	positive regulation of transferase activity	500	-0.322312087442624	-1.38703341362779	0.00255924561747411	0.0280892373372622	0.022632004092401	879	tags=11%, list=6%, signal=11%	UBE2N/UBA52/EMP2/LPAR1/DKC1/PCNA/HNRNPA2B1/CALM2/PARK7/FERMT2/HSP90AB1/CCN1/PPIA/RPS27A/ERBB3/RFC5/RPS3/CDC42/UBE2S/FLT1/DBI/CCT2/HNRNPD/GPRC5A/AXL/EPHA4/FGF1/PTPRC/CKS2/CHTF18/RFC2/BORA/CKS1B/CENPE/NCAPG2/RFC3/RFC4/MAP3K12/PSRC1/EZH2/EPHB1/EGF/TPX2/CCNB1/CDC6/PLK1/ADCYAP1/AURKB/CLSPN/HGF/CDC20/CDK1/PBK/KIF14/UBE2C/NEK2/IQGAP3
GO:0007276	GO:0007276	gamete generation	405	-0.3271905993046	-1.3831891951765	0.00256407553695922	0.0280892373372622	0.022632004092401	3060	tags=26%, list=22%, signal=21%	ATP2B4/SSTR1/HROB/SPATA6L/GDF9/CALR/PAQR8/MYCBP/METTL14/SOD1/CTDNEP1/CCDC136/LARP7/DPCD/KIT/H3-3A/TNFAIP6/EIF2S2/NRIP1/ADAMTS1/SRPK1/ODF2/SPATA5/FOSL1/NDRG3/INPP5B/DNMT3A/PARP11/SMAD4/CNTD1/IMMP2L/HSF2/ANKRD49/SPATA9/SPOCD1/HERC4/SEPTIN7/HOXA9/RAD23B/SPIN4/HSF2BP/PAX5/SEPTIN6/UBB/IHO1/MSH2/SPA17/DAZAP1/PAFAH1B3/MCM8/H3-3B/TSPAN8/IQCG/FANCC/NPM2/FANCL/SPATA24/NDC1/PDE3A/RAD51C/TSNAX/WT1/TESMIN/PAF…
GO:0015850	GO:0015850	organic hydroxy compound transport	136	0.400090578916156	1.55995435446361	0.00258058947258739	0.0282123339886548	0.0227311852800078	1194	tags=21%, list=9%, signal=20%	AGT/CD36/LIPG/REN/APOB/ABCC3/NISCH/PCSK9/PRKN/OSBPL10/NPC1/NPC2/MSR1/SYT7/LCAT/SPP1/OSBPL8/PLTP/AQP11/SLC2A13/TOR1A/PINK1/AKR1C1/GPM6B/SLC5A3/TSKU/C1QTNF1/SELENOM/RAB3B
GO:0010971	GO:0010971	positive regulation of G2/M transition of mitotic cell cycle	24	-0.667624749393671	-1.83815786797737	0.00259996774554101	0.0283661787095148	0.0228551407406097	199	tags=54%, list=1%, signal=53%	RCC2/BRD4/DBF4B/RAD51B/CDC25A/RAD51C/CDC25B/CDC7/FBXO5/CCNB1/DTL/CDC25C/CDK1
GO:0007178	GO:0007178	transmembrane receptor protein serine/threonine kinase signaling pathway	247	0.344279224648274	1.44912368719287	0.00264855559835519	0.028837430201236	0.0232348365494039	1958	tags=20%, list=14%, signal=18%	PCSK6/LRRC32/FMOD/LRP2/ACVR1C/SFRP4/ITGB8/GDF15/FST/ATOH8/SPRY1/PMEPA1/ASPN/DKK1/SPRED3/ONECUT2/HTRA1/BMP2/ITGB5/NOG/ZNF451/TGFBR2/CCN3/ITGA3/LOX/TGFB1/BMPR1B/ZFYVE9/PML/SFRP1/HIPK2/ARHGEF18/BMP4/PDCD4/SKIL/DKK3/GREM1/UBE2D1/SLC33A1/TGFBR1/TGFBR3/CD109/SMAD7/PELO/GCNT2/LTBP2/SMURF1/ACVR2B/LATS2/TF
GO:0001656	GO:0001656	metanephros development	48	0.517827308002608	1.72846555949584	0.00274479992888819	0.0298245943492607	0.0240302124711392	1832	tags=27%, list=13%, signal=24%	AKR1B1/RDH10/CTSH/SPRY1/LAMB2/STAT1/SMO/KIF26B/BMP4/GREM1/HOXA11/YAP1/PDGFRA
GO:0045056	GO:0045056	transcytosis	14	0.734151699143371	1.81712760884114	0.0027774018637921	0.030117627512845	0.0242663145652552	199	tags=21%, list=1%, signal=21%	LRP2/LRPAP1/FCGRT
GO:0048511	GO:0048511	rhythmic process	213	-0.375722422630822	-1.47971222848988	0.00279339168393647	0.0302297002881061	0.0243566136174474	2232	tags=22%, list=16%, signal=18%	ROBO2/CPT1A/HSPA5/ETS1/HNRNPU/RBM4/SFPQ/THRAP3/SUV39H1/CREBBP/TARDBP/NONO/TWIST1/C3orf70/BTRC/PRMT5/TP53/PRKAA1/PTN/HDAC1/KDM5C/OXTR/MAGED1/MAPK8/NFIL3/RACK1/PCNA/IMPDH2/CASP2/TIMELESS/SLIT2/NLGN1/HNRNPR/NDUFA9/HNRNPD/CAVIN3/AXL/SUV39H2/GPR157/HAS2/EZH2/TYMS/MSTN/DTL/TOP2A/CDK1
GO:2000779	GO:2000779	regulation of double-strand break repair	78	-0.483907002368428	-1.66775869461944	0.00282039666068566	0.0304602839354052	0.0245423990122823	1850	tags=24%, list=13%, signal=21%	DEK/SHLD2/TWIST1/CGAS/ACTR2/OGG1/AUNIP/TIMELESS/PARP1/PARPBP/PPP4R2/FANCB/SHLD1/RMI2/RAD51/CHEK1/POLQ/FOXM1/RAD51AP1
GO:0001894	GO:0001894	tissue homeostasis	155	0.38141151921361	1.50910465248118	0.00282980900026261	0.0305003203939595	0.0245746571075437	1958	tags=25%, list=14%, signal=22%	PDK4/CSF1/AKR1B1/CTSH/ANGPT1/ADGRV1/JCHAIN/EPAS1/PIWIL4/JAM2/SIGLEC15/CCN2/CRB1/SPP1/SMO/ATP6AP1/TPP1/P2RX4/SLC2A1/TLR4/GPR137B/BBS2/SLC1A1/ADD1/P2RX7/NANOS1/MKKS/LRRK1/F2R/DRAM2/TJP2/GCNT2/JAM3/IL6/YAP1/CLDN1/NPHP3/VEGFA/TF
GO:0031623	GO:0031623	receptor internalization	77	0.449189418644812	1.61481474967773	0.00283641405993369	0.0305099991235523	0.0245824554341812	2088	tags=31%, list=15%, signal=27%	CD36/SFRP4/MX1/LRPAP1/ANGPT1/DKK1/INSR/MX2/GRIA1/PCSK9/CD81/GRK3/PLCG2/ADM/NTF3/GREM1/SNAP25/OPHN1/FMR1/LRP1/GRK4/VEGFA/LDLRAP1/ACKR3
GO:0048754	GO:0048754	branching morphogenesis of an epithelial tube	101	0.434444017520258	1.62495136098911	0.0028462212523391	0.0305540136847487	0.024617918758342	1927	tags=23%, list=14%, signal=20%	AGT/CSF1/RDH10/CTSH/NFATC4/LAMA1/SPRY1/WNT2/WNT2B/BMP2/NOG/TGFBR2/SMO/PML/DDR1/BMP4/CELSR1/GREM1/DLL4/HOXA11/CTNNBIP1/YAP1/VEGFA
GO:0070646	GO:0070646	protein modification by small protein removal	255	-0.358178668831493	-1.44957933735869	0.00286739998848668	0.0307011746318462	0.0247364889821243	2876	tags=28%, list=21%, signal=23%	USP13/SNX3/BABAM2/SHMT2/USP31/USP45/USP1/NEDD8/USP44/UCHL3/STAM2/SMURF2/USP14/SMAD4/SUDS3/BRCC3/USP16/OTUB1/PSMA7/RAD23B/PSMD10/UBB/PSMD3/MDM4/SENP7/PSMC5/PSMC6/RHOA/UFD1/TAF10/PSME3/COPS5/PSMB4/CDC25A/PSMA1/PSME2/PSMB6/PSMA2/COPS6/TP53/SUPT3H/PSMD14/PSMD11/PSMA6/COPS4/PSMA3/PSMB5/PSMB3/PSMC2/ACTL6A/PSMB7/INO80/PSMC1/ENY2/UBA52/COPS3/PSMB1/PSMB9/PSMA5/ACTB/PARK7/PSMB2/TAF9B/RPS27A/PSMA4/BRCA1/SKP…
GO:0048771	GO:0048771	tissue remodeling	111	0.423443201787043	1.60942751216006	0.00287141550989957	0.0307011746318462	0.0247364889821243	1977	tags=28%, list=14%, signal=24%	AGT/PDK4/LEPR/MMP2/GPNMB/EPAS1/RUNX1/TGM2/CST3/SEMA3C/SIGLEC15/CRB1/SYT7/SPP1/TGFB1/ATP6AP1/TPP1/SFRP1/TIMP1/GPR137B/TMBIM1/GREM1/P2RX7/DLL4/LRRK1/F2R/RASSF2/IL6/ACVR2B/TF/CTHRC1
GO:0010212	GO:0010212	response to ionizing radiation	134	-0.419766777581458	-1.56451255299703	0.00290686638414628	0.0310181790212495	0.0249919051243336	2474	tags=34%, list=18%, signal=28%	DNMT3A/ELK1/HUS1/XRCC6/BRCC3/KDM1A/HSPA5/RHNO1/ECT2/MSH2/GTF2H5/CHEK2/ERCC8/INIP/XRCC4/NUCKS1/KARS1/ZMPSTE24/XRCC5/TP53/TOPBP1/PRKAA1/RAD9B/RPL26/BLM/DCLRE1C/EYA3/INO80/CLK2/NHEJ1/ANXA1/INTS7/RRM1/PARP1/RAD54B/VCAM1/XRCC2/PTPRC/RAD51/BRCA1/FANCD2/CXCL10/BRCA2/RAD51AP1/RAD54L
GO:0055119	GO:0055119	relaxation of cardiac muscle	14	0.732013214068105	1.81183456072057	0.00293063546293107	0.0312095163044412	0.0251460690172236	975	tags=43%, list=7%, signal=40%	PDE4B/KCNJ2/RGS2/ATP2A2/GSN/P2RX4
GO:0098900	GO:0098900	regulation of action potential	37	0.56571119275643	1.76783263194967	0.00293957809345964	0.031242513891919	0.0251726557673681	1590	tags=24%, list=11%, signal=22%	CD36/FGF13/KCNJ2/ATP2A2/CACNA1C/SLC9A1/NOS1AP/DSP/FMR1
GO:0006814	GO:0006814	sodium ion transport	121	0.399239777308951	1.54033179891009	0.00300209055389663	0.0318285774902538	0.0256448577569296	2872	tags=34%, list=20%, signal=27%	FGF13/CNTN1/KLHL3/SLC4A11/PCSK9/TPCN1/SLC3A2/SLC38A10/SLC9A1/STOM/SLC6A16/SLC6A8/SGK1/MLLT6/SLC9A7/SLC5A3/P2RX4/SLC38A6/SERPINE2/KLHL24/P2RX7/SLC38A2/SLC9B2/SLC6A6/SLMAP/SLC22A4/UTRN/ATP1B3/KCNK1/AHCYL1/SLC24A1/PKD2/SLC41A1/SLC38A1/PRKCE/SLC20A2/WNK3/SLC22A5/SCN1A/FGF11/SLC9A5
GO:0007004	GO:0007004	telomere maintenance via telomerase	61	-0.515323188721224	-1.69285563367946	0.00300662769034384	0.0318285774902538	0.0256448577569296	3004	tags=36%, list=21%, signal=28%	CCT4/HNRNPC/NAT10/RFC1/NEK7/HSP90AA1/GAR1/TCP1/HNRNPU/CCT6A/NOP10/XRCC5/CCT8/GNL3L/CCT3/DKC1/HSP90AB1/CCT5/CCT2/HNRNPA1/AURKB/NEK2
GO:0099536	GO:0099536	synaptic signaling	383	0.311609592990985	1.37440252065708	0.00303651303811426	0.0320106749103556	0.0257915769258226	2042	tags=21%, list=15%, signal=18%	SLC1A2/PPFIA4/RGS4/PDE7B/PCDHB16/CLSTN2/SLC30A1/LGMN/PCDHB11/CCL2/NFATC4/CACNA1E/LRRK2/ATP2A2/TRPV1/DGKI/GLRB/SQSTM1/NPTX1/PCDHB14/GRIA1/NISCH/GABBR2/SLC12A7/PRKN/FYN/GABRE/SYT7/FCHSD2/COLQ/UNC119/KCNQ3/GRM3/TOR1A/PINK1/GPER1/P2RX4/NTF3/BCR/CHRM3/KCND2/KCNC4/SERPINE2/INSYN2A/MME/GLS/RAB3B/PCDHB13/SYNGR1/EGR3/SLC1A1/SNCAIP/P2RX7/ABR/MECP2/PTPRA/TSHZ3/SNAP25/SLC7A11/CDK5/OPHN1/CADPS/FMR1/F2R/LYNX1/…
GO:0042407	GO:0042407	cristae formation	35	-0.6001138725058	-1.77961457569184	0.00304179252795747	0.0320106749103556	0.0257915769258226	2161	tags=49%, list=15%, signal=41%	ATP5PD/OMA1/ATP5PF/ATP5MF/ATP5F1D/ATP5MC3/ATP5F1E/ATP5MC2/ATP5F1C/ATP5PB/ATP5ME/ATP5F1A/ATP5MG/APOO/DNAJC11/ATP5MC1/ATP5PO
GO:0070987	GO:0070987	error-free translesion synthesis	21	-0.699308019990693	-1.85852435634328	0.00304179252795747	0.0320106749103556	0.0257915769258226	2124	tags=52%, list=15%, signal=45%	POLH/UBB/UFD1/UBA52/PCNA/RPS27A/RFC5/RPA3/RFC2/RFC3/RFC4
GO:0016579	GO:0016579	protein deubiquitination	238	-0.364053730071101	-1.46043506262958	0.00305023692561013	0.0320364766292961	0.0258123658351704	2876	tags=29%, list=21%, signal=23%	USP13/SNX3/BABAM2/SHMT2/USP31/USP45/USP1/NEDD8/USP44/UCHL3/STAM2/SMURF2/USP14/SMAD4/SUDS3/BRCC3/USP16/OTUB1/PSMA7/RAD23B/PSMD10/UBB/PSMD3/MDM4/PSMC5/PSMC6/RHOA/UFD1/TAF10/PSME3/COPS5/PSMB4/CDC25A/PSMA1/PSME2/PSMB6/PSMA2/TP53/SUPT3H/PSMD14/PSMD11/PSMA6/PSMA3/PSMB5/PSMB3/PSMC2/ACTL6A/PSMB7/INO80/PSMC1/ENY2/UBA52/PSMB1/PSMB9/PSMA5/ACTB/PARK7/PSMB2/TAF9B/RPS27A/PSMA4/BRCA1/SKP2/CCNA2/BARD1/CLSPN/CDC2…
GO:0009069	GO:0009069	serine family amino acid metabolic process	31	-0.594524042791539	-1.7416880285283	0.0030767616369503	0.0321935945785201	0.025938958594779	1475	tags=32%, list=11%, signal=29%	MTHFD1/CTH/GGT1/MPST/SEPHS1/PHGDH/PSAT1/CBS/CDO1/DHFR
GO:0003081	GO:0003081	regulation of systemic arterial blood pressure by renin-angiotensin	12	0.764048579611931	1.83176309207394	0.0030772403347594	0.0321935945785201	0.025938958594779	1608	tags=50%, list=11%, signal=44%	AGT/SUCNR1/REN/ATP6AP2/MME/F2R
GO:0061035	GO:0061035	regulation of cartilage development	46	0.525937019937581	1.74249581969835	0.00309029390390669	0.0322670140825883	0.0259981140106624	1789	tags=28%, list=13%, signal=25%	PTHLH/EFEMP1/BMP2/NOG/CCN2/BMPR1B/SCIN/BMP4/GREM1/TGFBR1/SMAD7/HOXA11/TAPT1
GO:0030324	GO:0030324	lung development	118	0.404610079340295	1.55062950258834	0.00315466964143706	0.0328749783686599	0.0264879617785174	1927	tags=29%, list=14%, signal=25%	CHI3L1/RDH10/CTSH/LAMA1/SPRY1/WNT2/WNT2B/TMEM38B/EPAS1/NOG/GATA6/CCN2/TGFBR2/ITGA3/LOX/PTK7/MMP12/FGF7/THRA/BMP4/MME/CELSR1/ERRFI1/SLC7A11/MAN1A2/FGF9/HSD11B1/HEG1/FBXW7/YAP1/PDGFRA/PLOD3/NPHP3/VEGFA
GO:0072088	GO:0072088	nephron epithelium morphogenesis	42	0.543428296745363	1.76670355629485	0.0031682857290593	0.0329526371742238	0.0265505328759178	2999	tags=48%, list=21%, signal=38%	AGT/KLHL3/WNT2B/BMP2/NOG/STAT1/SMO/KIF26B/BMP4/GREM1/HOXA11/CTNNBIP1/VEGFA/PKD2/LIF/AHI1/HOXD11/GZF1/PBX1/FGF2
GO:0042692	GO:0042692	muscle cell differentiation	241	0.337455627604679	1.41772923175491	0.00317622894730961	0.0329711067035285	0.0265654141081061	1927	tags=23%, list=14%, signal=20%	MYH3/EREG/RGS4/MYOZ2/FHOD3/GDF15/HDAC9/RGS2/SOD2/CYP26B1/NFATC4/KLF5/ATP2A2/OBSCN/DKK1/TNNT2/TMOD1/ACTC1/BMP2/JAM2/GATA6/EFEMP2/CCN3/CD81/LOX/SMO/TGFB1/SLC9A1/FHL2/ADM/SMARCD3/GPER1/SDC1/MEF2A/GPX1/BMP4/PDCD4/POPDC3/PLD3/SORT1/GREM1/DYSF/ID2/TANC1/MECP2/AKAP6/FGF9/CSRP2/BIN3/MAPK12/PDGFRA/POPDC2/ERVW-1/ZBED6/VEGFA
GO:0045023	GO:0045023	G0 to G1 transition	39	-0.591210426702668	-1.81099834769549	0.00320835003945161	0.0331757046632656	0.0267302623667637	2414	tags=38%, list=17%, signal=32%	RBBP8/PHC3/RBBP7/RHNO1/EHMT1/CDKN2B/RBBP4/TFDP1/CBX5/RAD51/CHEK1/BRCA1/CDC7/EZH2/RRM2
GO:0070316	GO:0070316	regulation of G0 to G1 transition	39	-0.591210426702668	-1.81099834769549	0.00320835003945161	0.0331757046632656	0.0267302623667637	2414	tags=38%, list=17%, signal=32%	RBBP8/PHC3/RBBP7/RHNO1/EHMT1/CDKN2B/RBBP4/TFDP1/CBX5/RAD51/CHEK1/BRCA1/CDC7/EZH2/RRM2
GO:0007565	GO:0007565	female pregnancy	117	0.411304327261489	1.57401368510793	0.00321834625038777	0.0332148244296776	0.0267617818666668	1075	tags=19%, list=8%, signal=18%	PTHLH/STC1/ACVR1C/MMP2/AKR1B1/RGS2/OVGP1/PAPPA/BSG/PAM/IGFBP7/TGFBR2/ITGA3/SPP1/PSG9/PSG6/ANGPT2/ADM/SLC2A1/VDR/TIMP1/DDR1
GO:0007007	GO:0007007	inner mitochondrial membrane organization	56	-0.519771185339753	-1.69001732541598	0.00324460258227027	0.0333985088040095	0.0269097796731461	2165	tags=45%, list=15%, signal=38%	TIMM9/ROMO1/IMMT/MICOS10/ATP5PD/OMA1/ATP5PF/MAIP1/ATP5MF/ATP5F1D/ATP5MC3/ATP5F1E/ATP5MC2/TIMM8B/AGK/ATP5F1C/ATP5PB/ATP5ME/ATP5F1A/ATP5MG/APOO/TIMM10/DNAJC11/ATP5MC1/ATP5PO
GO:0048638	GO:0048638	regulation of developmental growth	207	0.362249759216068	1.50023420909511	0.00325304021243046	0.0333985088040095	0.0269097796731461	2396	tags=27%, list=17%, signal=22%	FGF13/CSF1/RGS4/GDF15/RGS2/LGMN/BCL11A/WNT2/CDKN1A/INSR/RUNX1/PRKN/NOG/GATA6/SEMA5A/SEMA3C/TGFBR2/VGLL4/TRPV2/SPP1/MACF1/SMO/SEMA6A/BMP4/ITSN2/BBS2/SEMA4B/GPAT4/AKAP6/TGFBR1/CDK5/RNF157/MKKS/TGFBR3/SEMA4D/ACACB/ATRN/SMAD7/LRP1/AGRN/CDK5R1/YAP1/SMURF1/VEGFA/LATS2/GPAM/CDKL3/BDNF/STAT5A/PIK3CA/CYFIP1/SEMA4F/STAT5B/BCL2L11/GHR
GO:0072425	GO:0072425	signal transduction involved in G2 DNA damage checkpoint	13	-0.765010940978681	-1.85780935233541	0.00325488647341732	0.0333985088040095	0.0269097796731461	242	tags=31%, list=2%, signal=30%	CHEK1/BRCA1/PLK1/DTL
GO:0015931	GO:0015931	nucleobase-containing compound transport	220	-0.371823345141653	-1.47657548256353	0.00329417876174286	0.0337369342150906	0.0271824551180717	3661	tags=41%, list=26%, signal=31%	FLOT1/POLDIP3/LRPPRC/AGFG1/XPO5/SUPT6H/NUP153/SRSF6/NOL6/NUP107/SNUPN/GLE1/NUP205/SRSF4/QKI/POLR2D/NMD3/SLC35A4/MYO1C/CHTOP/SLC25A51/SRSF9/NXT2/SSB/AHCTF1/UPF3B/CPSF3/ABCC5/PARP11/YBX1/ALYREF/XPO1/SLC25A17/DDX19B/HNRNPA1L2/HNRNPU/NUP93/RAE1/PABPN1/SLC35D1/SFPQ/NUP88/PNPT1/TSC1/FYTTD1/SLC35A2/NUP85/NCBP1/CKAP5/XPOT/SEH1L/MRPL18/PHAX/ZFP36/NDC1/RIOK2/SRRM1/CETN3/NXT1/SLBP/EIF4A3/SRSF2/KHDRBS1/NUP15…
GO:1901605	GO:1901605	alpha-amino acid metabolic process	128	-0.413525957331298	-1.53118312831104	0.00331207289773499	0.0338457766426045	0.0272701514209419	2156	tags=29%, list=15%, signal=25%	MTAP/OGDH/AZIN1/OAT/GART/AASS/ADI1/ALDH18A1/PLOD2/MTHFD1/CPS1/CTH/AFMID/MSRA/SLC25A12/PYCR1/CTPS1/HSD17B10/GGT1/GOT1/MPST/DLD/ALDH7A1/PFAS/PARK7/ARG2/FAH/SEPHS1/SLC25A21/PHGDH/SMS/ODC1/PSAT1/CBS/ASNS/CDO1/DHFR
GO:0006278	GO:0006278	RNA-dependent DNA biosynthetic process	63	-0.521901665507581	-1.73090179175245	0.00331746856728858	0.0338457766426045	0.0272701514209419	3004	tags=37%, list=21%, signal=29%	CCT4/HNRNPC/NAT10/RFC1/NEK7/HSP90AA1/GAR1/TCP1/HNRNPU/CCT6A/NOP10/XRCC5/CCT8/GNL3L/CCT3/DKC1/HSP90AB1/PPIA/CCT5/CCT2/HNRNPA1/AURKB/NEK2
GO:0045333	GO:0045333	cellular respiration	171	-0.388009599317489	-1.50358611759932	0.00339280525376969	0.0344892324723118	0.0277885953643058	2875	tags=35%, list=21%, signal=28%	NDUFA5/PDHA1/SHMT2/IDH3B/SDHAF2/NDUFB1/COX7C/SUCLA2/SUCLG2/NDUFA4/BLOC1S1/COX2/IMMP2L/LYRM7/COX10/NDUFA1/NDUFAF1/OGDH/NDUFB2/IDH2/DLAT/COX15/NDUFA6/PNPT1/CISD1/ATP5F1D/SLC25A14/COX6B1/NDUFS5/NDUFS1/PRELID1/SDHD/COX6C/MDH1/UQCRQ/NDUFB7/UQCRH/CYC1/ETFRF1/UQCR10/UQCRC2/PDHB/SLC25A12/NDUFA12/SUCLG1/NDUFS4/UQCRHL/NDUFB9/DLD/IDH1/COX7B/DNAJC15/CS/NDUFB3/PARK7/NDUFA9/CYCS/MTFR2/CCNB1/CDK1
GO:1902410	GO:1902410	mitotic cytokinetic process	21	-0.694606629605869	-1.84602964973461	0.00339344112989824	0.0344892324723118	0.0277885953643058	186	tags=29%, list=1%, signal=28%	MITD1/RHOA/CHMP4A/KIF20B/CEP55/KIF20A
GO:0007018	GO:0007018	microtubule-based movement	255	-0.355165838913722	-1.43738616010996	0.00343270864217165	0.0348221259981967	0.0280568136697621	2187	tags=18%, list=16%, signal=15%	HNRNPU/KIF2A/IFT52/UBB/SPA17/SFPQ/SYNE2/MAP1B/IQCG/SLC9A3R1/WASF1/ODAD4/KPNB1/PEX14/ACTR2/PAFAH1B1/HYDIN/AP3M1/DYNLRB1/DYNLL1/KATNIP/INTS13/KIF24/ARL3/COPG1/HSPA8/CCDC65/KIF18A/TTC12/HSPB11/CDC42/TTC26/DNAH5/CENPE/KIF23/KIF20B/RACGAP1/KIF15/KIF11/KIF18B/KIF14/KIF2C/KIF4A/KIF20A/DLGAP5
GO:0072028	GO:0072028	nephron morphogenesis	43	0.541562656534014	1.76420141708903	0.00344040515085667	0.0348341021524238	0.0280664630727781	2999	tags=47%, list=21%, signal=37%	AGT/KLHL3/WNT2B/BMP2/NOG/STAT1/SMO/KIF26B/BMP4/GREM1/HOXA11/CTNNBIP1/VEGFA/PKD2/LIF/AHI1/HOXD11/GZF1/PBX1/FGF2
GO:0032984	GO:0032984	protein-containing complex disassembly	287	-0.350306887673757	-1.43580642355935	0.00347015184837918	0.0350688691520513	0.0282556190698789	2348	tags=26%, list=17%, signal=23%	FZD2/DVL1/SUPT16H/MRPL39/MRPL45/MRPS23/MRPL11/KIF2A/MRPL37/SMARCB1/MRPL20/MRPL17/MAP1B/CKAP5/MRPS35/SPTA1/MRPS17/MRPL18/SET/MRPS18C/MTRF1/WDR1/MRPL21/MRPL30/MRPS18B/MRPL3/PEX14/ZMPSTE24/MRPL35/MRPS27/MICAL3/MRPL15/SH3GL1/MICAL2/MRPL52/MRPS36/MRPS28/SMARCC1/GSPT1/ERAL1/CAPZB/SMARCE1/MRPL51/EIF5AL1/MRPL47/CAPZA1/MRPL33/MRPS9/MRPL4/MRPL13/MRPL42/MRPL22/CFL2/CARMIL1/ABCE1/MRPL40/VTA1/RPL23/KIF24/HSPA…
GO:0030278	GO:0030278	regulation of ossification	77	0.445801077529446	1.60263382336264	0.00348012944246663	0.0351033433951445	0.0282833955880307	1866	tags=23%, list=13%, signal=20%	MGP/CSF1/ISG15/ADGRV1/DHRS3/DKK1/BMP2/ANKH/TGFB1/BMPR1B/GPM6B/SFRP1/BMP4/GREM1/P2RX7/SMAD7/ACVR2B/ATRAID
GO:0045840	GO:0045840	positive regulation of mitotic nuclear division	34	-0.599587320489705	-1.78175279181103	0.00348751177077207	0.0351115591837053	0.0282900151967476	141	tags=15%, list=1%, signal=15%	CDC23/EGF/AURKA/NUSAP1/DLGAP5
GO:0007250	GO:0007250	activation of NF-kappaB-inducing kinase activity	15	0.724129207391215	1.8349729179576	0.00353621904821111	0.03553501321755	0.0286311997334386	912	tags=27%, list=7%, signal=25%	CHI3L1/TNFSF15/TNFRSF10A/IRAK1
GO:0051046	GO:0051046	regulation of secretion	360	0.310365467049582	1.36083959266339	0.00356889461387261	0.0357960799357654	0.0288415458871664	1827	tags=18%, list=13%, signal=16%	AGT/DPP4/PTGES/STC1/ACVR1C/SLC30A1/PLA2G4A/REN/CACNA1E/LRRK2/ATP2A2/EXPH5/PTGER3/PFKFB2/ANO1/SCAMP5/BMP2/ARL2/PAM/PRKN/PLA2R1/SYT7/CACNA1C/CCN3/SPP1/TGFB1/SCIN/ATP6AP1/SCG5/SGK1/PINK1/GPER1/P2RX4/SLC2A1/RAB9A/SFRP1/GPLD1/SERGEF/SDC1/TLR4/SLC25A4/OAS2/C1QTNF1/RAB3B/SYTL4/SEPTIN4/SIRT3/SNCAIP/SOX4/APBB1/P3H1/CYP51A1/SLC9B2/SNAP25/CDK5/CADPS/FMR1/NADK/F2R/LAMP1/LRP1/MYO6/VPS18/IL6/MCTP1
GO:0006298	GO:0006298	mismatch repair	28	-0.632698606837657	-1.80844251709118	0.00362610171682341	0.0363017598841535	0.0292489813231646	2025	tags=39%, list=14%, signal=34%	MSH2/TDG/PMS2P1/PMS1/MLH1/HMGB1/PCNA/POLD3/RPA3/RNASEH2A/EXO1
GO:0090224	GO:0090224	regulation of spindle organization	35	-0.596070973828244	-1.7676255153747	0.00363994179971205	0.0363722034789918	0.029305738995419	257	tags=26%, list=2%, signal=25%	HNRNPU/RAE1/DRG1/GPSM2/BORA/PSRC1/TPX2/PLK1/SPAG5
GO:0090287	GO:0090287	regulation of cellular response to growth factor stimulus	198	0.34949335299323	1.43173331274389	0.00367180302096359	0.0365747118632303	0.0294689036454877	1671	tags=17%, list=12%, signal=15%	AGT/PCSK6/LRP2/SULF2/SFRP4/JCAD/FST/XDH/SPRY1/PMEPA1/ASPN/SPRED3/ONECUT2/HTRA1/NOG/ZNF451/TGFBR2/ITGA3/LOX/TGFB1/SEMA6A/NTF3/SFRP1/HIPK2/BMP4/SKIL/DKK3/GREM1/TGFBR1/TGFBR3/CD109/SMAD7/PELO
GO:0010934	GO:0010934	macrophage cytokine production	13	0.747663574408758	1.8224884282921	0.00367389081005512	0.0365747118632303	0.0294689036454877	1030	tags=31%, list=7%, signal=29%	CD36/TGFB1/GPRC5B/TLR4
GO:0042308	GO:0042308	negative regulation of protein import into nucleus	11	0.75937744858489	1.7839288317483	0.00369623548168522	0.0366606213081432	0.0295381224315124	1167	tags=36%, list=8%, signal=33%	CD36/ANGPT1/APOD/PKIG
GO:1904590	GO:1904590	negative regulation of protein import	11	0.75937744858489	1.7839288317483	0.00369623548168522	0.0366606213081432	0.0295381224315124	1167	tags=36%, list=8%, signal=33%	CD36/ANGPT1/APOD/PKIG
GO:2000241	GO:2000241	regulation of reproductive process	90	-0.463626177546234	-1.63233922231194	0.00371718725892621	0.0368001538633695	0.0296505463226629	1738	tags=22%, list=12%, signal=20%	NPM2/PDE3A/CDC25A/WT1/ARHGDIB/CITED2/CDC25B/INTS13/WDR77/OXTR/POMZP3/C1QBP/PHLDA2/FBXO5/AURKA/TRIP13/RAD51AP1/CDC25C/CDC20/TTK
GO:0072431	GO:0072431	signal transduction involved in mitotic G1 DNA damage checkpoint	51	-0.523689840771009	-1.67538787425548	0.00373144683277118	0.0368050087970383	0.0296544580301023	2166	tags=39%, list=15%, signal=33%	TRIAP1/CNOT6/CHEK2/MDM4/CNOT9/CNOT2/PCBP4/TP53/PRMT1/RPL26/TFDP1/PCNA/CDK2/CASP2/E2F7/AURKA/CCNB1/GTSE1/CDC25C/CDK1
GO:1902400	GO:1902400	intracellular signal transduction involved in G1 DNA damage checkpoint	51	-0.523689840771009	-1.67538787425548	0.00373144683277118	0.0368050087970383	0.0296544580301023	2166	tags=39%, list=15%, signal=33%	TRIAP1/CNOT6/CHEK2/MDM4/CNOT9/CNOT2/PCBP4/TP53/PRMT1/RPL26/TFDP1/PCNA/CDK2/CASP2/E2F7/AURKA/CCNB1/GTSE1/CDC25C/CDK1
GO:0048640	GO:0048640	negative regulation of developmental growth	72	0.454078669936413	1.62216171956834	0.00379828657332847	0.0373952854898968	0.0301300545857518	1680	tags=28%, list=12%, signal=25%	FGF13/RGS4/GDF15/RGS2/LGMN/BCL11A/CDKN1A/NOG/SEMA5A/SEMA3C/TGFBR2/VGLL4/SPP1/SEMA6A/BMP4/BBS2/SEMA4B/CDK5/SEMA4D/CDK5R1
GO:0016042	GO:0016042	lipid catabolic process	214	0.353280045270859	1.47580311148011	0.0038335742694875	0.0376733236115444	0.0303540749046882	2720	tags=33%, list=19%, signal=27%	PLCH1/LIPG/RARRES2/ASAH1/CYP27A1/FABP3/CYP26B1/PLA2G4A/APOB/AKR1B10/HEXA/FABP4/PLA2G4C/NEU1/SMPD1/IVD/PLBD1/FUCA1/ACAD11/TYSND1/PLCXD2/HEXB/SPP1/CYP1B1/ABHD16A/PLCG2/GM2A/GPLD1/ABHD4/CES4A/THRA/PLD6/PHYH/CES2/PLD2/PLA2G15/ACOT8/BSCL2/PDXDC2P-NPIPB14P/ACACB/CROT/LRP1/HSD11B1/ACAA1/AKT2/GDPD1/GDE1/LPIN2/PLCG1/ABHD6/LDLR/BCO2/PLBD2/GDPD3/SESN2/ALDH3A2/SPHK1/GALC/ABCD4/ACOX3/PAFAH2/ACADVL/CYP39A1/SIR…
GO:0043484	GO:0043484	regulation of RNA splicing	125	-0.408266357136652	-1.50652886915052	0.00385087890090245	0.0377499622103009	0.0304158240031014	3679	tags=47%, list=26%, signal=35%	HNRNPLL/SNRNP70/FXR1/SFSWAP/AKAP17A/RBM24/SRSF6/POLR2A/SRSF4/TMBIM6/QKI/CDK12/RBM22/LARP7/TIA1/SRSF9/PTBP1/SRPK1/SNW1/SAP18/CWC22/CLK4/HNRNPU/SRSF10/RBM4/DAZAP1/THRAP3/NCBP1/HNRNPH2/RBM23/SMU1/TRA2A/PCBP4/KHDRBS1/AHNAK/SF3B4/HNRNPH3/HNRNPL/RBFOX2/HNRNPH1/PRDX6/RBM8A/CLK2/RBMX/RPS13/RBM25/C1QBP/RBMXL1/HNRNPA2B1/HSPA8/SRSF3/RBM7/NCL/RPS26/MAGOH/SRSF7/HNRNPA1/TRA2B/RBM3
GO:0019953	GO:0019953	sexual reproduction	480	-0.311705537232408	-1.3358463123066	0.00385549557927877	0.0377499622103009	0.0304158240031014	2198	tags=26%, list=16%, signal=23%	ATP2B4/SSTR1/HROB/SPATA6L/GDF9/CCT4/CALR/UBAP2L/PAQR8/MYCBP/METTL14/SOD1/CTDNEP1/CCDC136/LARP7/DPCD/KIT/H3-3A/TNFAIP6/EIF2S2/NRIP1/ADAMTS1/SRPK1/ODF2/SPATA5/FOSL1/NDRG3/INPP5B/DNMT3A/PARP11/STX2/SMAD4/CNTD1/IMMP2L/HSF2/ANKRD49/SPATA9/TCP1/SPOCD1/HERC4/SEPTIN7/HOXA9/RAD23B/SPIN4/HSF2BP/PAX5/SEPTIN6/UBB/IHO1/MSH2/SPA17/DAZAP1/PAFAH1B3/MCM8/H3-3B/TSPAN8/IQCG/FANCC/UBXN8/NPM2/FANCL/SPATA24/NDC1/PDE3A…
GO:0051972	GO:0051972	regulation of telomerase activity	40	-0.568554939363599	-1.73950887143228	0.00390773215600385	0.0381914736855514	0.0307715577453435	1479	tags=22%, list=11%, signal=20%	XRCC5/TP53/DKC1/HNRNPA2B1/HSP90AB1/CCT2/HNRNPD/AURKB/NEK2
GO:0007292	GO:0007292	female gamete generation	87	-0.465403114111553	-1.62782929764687	0.00392903326973995	0.0383295836861857	0.0308828354586551	2037	tags=25%, list=15%, signal=22%	UBB/IHO1/MCM8/H3-3B/NPM2/PDE3A/RAD51C/MLH1/PTN/CDC25B/WDR77/POMZP3/RPS6/FBXO5/AURKA/BRCA2/TRIP13/CCNB1/PLK1/TOP2A/CCNB2/TTK
GO:0010935	GO:0010935	regulation of macrophage cytokine production	12	0.755093129728185	1.81029290940794	0.003962796536403	0.0385885433216948	0.0310914838979217	1030	tags=33%, list=7%, signal=31%	CD36/TGFB1/GPRC5B/TLR4
GO:0045444	GO:0045444	fat cell differentiation	153	0.381536238903193	1.50693458360295	0.00403899900767241	0.039193440372385	0.0315788603390236	1832	tags=20%, list=13%, signal=18%	MMP11/RARRES2/RGS2/FABP3/KLF5/MEDAG/LMO3/FABP4/CCND1/BMP2/JDP2/FNDC5/OSBPL8/TGFB1/CCDC71L/CEBPB/GPER1/SFRP1/DIO2/GPX1/BBS2/SORT1/ZNF516/MKKS/BSCL2/CREBL2/ERO1A/AKT2/IL6/YAP1/PDGFRA
GO:0051984	GO:0051984	positive regulation of chromosome segregation	13	-0.758732868005822	-1.84256321393548	0.00403957830998581	0.039193440372385	0.0315788603390236	96	tags=46%, list=1%, signal=46%	RCC2/HNRNPU/SMC5/CCNB1/CDC6/AURKB
GO:0051298	GO:0051298	centrosome duplication	60	-0.508329150153658	-1.67933834816973	0.00404966451599977	0.0392201204756065	0.0316003569783964	703	tags=18%, list=5%, signal=17%	CEP135/POC1B/CDK2/NPM1/STIL/RBM14/CCNF/BRCA1/BRCA2/PLK4/NDC80
GO:0006937	GO:0006937	regulation of muscle contraction	97	0.415357379994258	1.55414166274527	0.00414699590628098	0.0400901267901955	0.0323013367250438	988	tags=16%, list=7%, signal=15%	FGF13/PDE4B/STC1/KCNJ2/RGS2/MYL3/ATP2A2/TMEM38B/TNNT2/TNNI3K/CCN2/CACNA1C/SLC9A1/GPER1/P2RX4/CHRM3
GO:0008652	GO:0008652	cellular amino acid biosynthetic process	55	-0.532536385988296	-1.73159069130638	0.0041647574893407	0.040189158010858	0.0323811279619649	2156	tags=35%, list=15%, signal=29%	MTAP/OAT/AASS/ADI1/ALDH18A1/PLOD2/MTHFD1/CTH/SLC25A12/PYCR1/GGT1/GOT1/PARK7/PHGDH/BCAT1/PSAT1/CBS/ASNS/DHFR
GO:0006360	GO:0006360	transcription by RNA polymerase I	65	-0.493145858152665	-1.64289110586778	0.00418811126965475	0.0403416988244582	0.032504032841019	3961	tags=52%, list=28%, signal=38%	BNC1/SMARCA4/UBTF/POLR2F/MNAT1/ERCC2/GTF2H1/MAPK3/POLR2K/TTF1/POLR1C/UTP15/CCNH/MARS1/HEATR1/CDK7/POLR1H/SMARCB1/GTF2H5/WDR75/POLR1E/POLR1G/CAVIN1/NOL11/PWP1/ZMPSTE24/FLNA/TAF1D/GTF2H2/TAF1A/DHX33/POLR2H/NCL/GTF2H3
GO:2001252	GO:2001252	positive regulation of chromosome organization	146	-0.403954011720176	-1.52243802235313	0.00420559457371383	0.0404372456673995	0.0325810166520958	3620	tags=41%, list=26%, signal=31%	MAPK1/RIF1/TRIM28/IL1B/SLX4/SIN3A/MAPK3/BRD7/RPS6KA5/CCT7/C6orf89/KAT7/CTNNB1/CCT4/CHTOP/NSMCE2/SLF1/WDR5/PAXBP1/SNW1/NEK7/SMAD4/RAD21/PPHLN1/BRD4/NBN/KDM1A/TCP1/SMARCB1/SFPQ/TADA2A/PRKD1/SMC5/RPS6KA4/CCT6A/XRCC5/TP53/RUVBL2/CCT8/GNL3/TET1/WDR61/UBE2N/GTF2H2/CCT3/DKC1/HNRNPA2B1/DNMT1/MYB/CCT5/SSBP1/CCT2/HNRNPD/PHF19/HNRNPA1/BRCA1/FEN1/CCNB1/AURKB/NEK2
GO:0060688	GO:0060688	regulation of morphogenesis of a branching structure	33	0.568819311640741	1.74989321535846	0.00424040479327086	0.040698750493404	0.0327917157971546	1273	tags=33%, list=9%, signal=30%	AGT/BCL11A/LRRK2/WNT2/WNT2B/NOG/SMO/SFRP1/FGF7/BMP4/GREM1
GO:0006898	GO:0006898	receptor-mediated endocytosis	189	0.35821903834219	1.46861826417238	0.00425062282894327	0.0407237090385855	0.0328118253462288	2230	tags=29%, list=16%, signal=25%	CD36/LRP2/CD14/SFRP4/MX1/LRPAP1/APOB/ANGPT1/JCHAIN/DKK1/INSR/MX2/GRIA1/PCSK9/VLDLR/MSR1/CTSL/CLTCL1/TGFBR2/PLA2R1/FCHSD2/CD81/SCARB2/UNC119/ITGA4/GRK3/PLCG2/ADM/NTF3/SNX9/ITSN2/GREM1/BTBD8/LMBR1L/WASL/SLC9B2/SNAP25/OPHN1/HIP1/FMR1/LRP1/GRK4/SGIP1/VEGFA/TF/LDLRAP1/FCHO2/APOL1/ITGAV/LDLR/ACKR3/AAK1/IGF2R/CLN3/HFE
GO:0060352	GO:0060352	cell adhesion molecule production	11	-0.79112348750823	-1.82513617832851	0.00429341941975615	0.0410482851796924	0.0330733421850673	638	tags=36%, list=5%, signal=35%	PPIA/CAV1/MYOCD/CXCL8
GO:0006839	GO:0006839	mitochondrial transport	239	-0.35879412583734	-1.44007991444422	0.00429985778163632	0.0410482851796924	0.0330733421850673	2865	tags=33%, list=20%, signal=27%	SLC25A51/TIMM9/ROMO1/GRPEL2/ATPSCKMT/YWHAG/VDAC1/STOML2/ALKBH7/GRPEL1/HSP90AA1/PDCD5/IMMP2L/TMEM14B/CPT1A/TIMM23B/ATP5PD/ABCB10/TOMM5/HSPA4/TIMM44/ATP5PF/MAIP1/PMPCA/MPC1/ATP5MF/MCUB/ATF2/PNPT1/TMEM14A/BCS1L/ATP5F1D/SLC25A14/PPIF/PMAIP1/SLC25A1/MRPL18/YWHAZ/ATP5MC3/YWHAE/SAE1/ATP5F1E/IMMP1L/PMPCB/TP53/SFXN1/PRKAA1/CHCHD4/UBE2L3/YWHAH/TIMM21/SLC25A33/HAX1/SLC25A12/DYNLT1/ATP5MC2/TIMM8B/SFXN5/AGK/A…
GO:0062009	GO:0062009	secondary palate development	16	0.703576781570507	1.82296290323904	0.00431080168461347	0.0410767636283763	0.033096287783747	1536	tags=25%, list=11%, signal=22%	LRRC32/ITGB8/TGFBR2/TGFBR3
GO:0055010	GO:0055010	ventricular cardiac muscle tissue morphogenesis	28	0.595681967590581	1.75354335686616	0.00431820822281098	0.0410767636283763	0.033096287783747	1699	tags=39%, list=12%, signal=35%	LRP2/MYL3/TNNT2/NOG/TGFB1/DLL4/DSP/TGFBR1/TGFBR3/SMAD7/HEG1
GO:0040013	GO:0040013	negative regulation of locomotion	218	0.340143173559842	1.42087997239236	0.00434952361333191	0.0413011602786366	0.0332770882037098	2999	tags=32%, list=21%, signal=26%	DPP4/STC1/ACVR1C/FBLN1/CCL2/PADI2/APOD/SCAI/NISCH/NOG/SEMA5A/SEMA3C/CCN3/VASH1/OSBPL8/TGFB1/CYP1B1/ANGPT2/TP53INP1/BMERB1/SP100/DNAJA4/SEMA6A/SFRP1/IGFBP3/TIMP1/HYAL2/SRGAP3/SEMA4B/GADD45A/GREM1/MECP2/WASL/MIA3/DLL4/RECK/PTPRR/DNAI3/KANK1/SEMA4D/SRGAP1/SMAD7/LRP1/NFE2L2/PTPRM/IL27RA/MCTP1/LIMCH1/ABHD6/PTPRU/DAG1/RIPOR2/SEMA4F/MIF/FOXO3/DAB2IP/IFITM1/HOXA7/TCAF1/CERS2/THBS1/RAP2A/IL24/STK24/PTPRK/…
GO:0051169	GO:0051169	nuclear transport	299	-0.341285844483476	-1.40763434058002	0.00437305312473529	0.0413881420068935	0.0333471709477244	3625	tags=40%, list=26%, signal=30%	POLDIP3/MAPK1/TRIM28/DMAP1/AGFG1/IL1B/AKT1/HSPA9/XPO5/SUPT6H/ANP32B/NUP153/SRSF6/NOL6/NUP107/EFCAB7/PPP3CA/FERMT1/SNUPN/GLE1/NUP205/SRSF4/JUP/PPP1CC/POLR2D/NMD3/RBM22/APPL1/CALR/CHTOP/TMCO6/SRSF9/NXT2/SSB/KPNA5/HIKESHI/IPO5/UPF3B/TCF7L2/CPSF3/HTATIP2/ALYREF/XPO1/DDX19B/HEATR3/NUP93/RAE1/APPL2/PABPN1/GEMIN6/ECT2/RBM4/PPP1R12A/NUP88/TSC1/FYTTD1/NUP85/NCBP1/CSE1L/TARDBP/IPO4/XPOT/SEH1L/PHAX/NDC1/RIO…
GO:0006361	GO:0006361	transcription initiation from RNA polymerase I promoter	36	-0.583412019197922	-1.75003241439672	0.00437563062053863	0.0413881420068935	0.0333471709477244	3852	tags=61%, list=27%, signal=44%	SMARCA4/UBTF/POLR2F/MNAT1/ERCC2/GTF2H1/MAPK3/POLR2K/POLR1C/CCNH/CDK7/POLR1H/SMARCB1/GTF2H5/POLR1E/POLR1G/CAVIN1/TAF1D/GTF2H2/TAF1A/POLR2H/GTF2H3
GO:0019216	GO:0019216	regulation of lipid metabolic process	278	0.324218869232643	1.38813733684811	0.00438837096423382	0.0413881420068935	0.0333471709477244	2553	tags=26%, list=18%, signal=22%	AGT/CD36/PDK4/ANGPTL4/FASN/RARRES2/ASAH1/FABP3/PIK3IP1/RDH10/APOB/PSAP/APOD/BMP2/IGFBP7/NPC2/TYSND1/PLPP1/CD81/TGFB1/FHL2/MBTPS1/ADM/DHCR7/SMARCD3/GPER1/GRHL1/GPLD1/NPAS2/THRA/PLIN2/DKK3/SLC27A1/SIRT3/ID2/CYP51A1/FADS1/ZBTB20/BSCL2/CREBL2/ACACB/VAV3/PDP1/PIP4K2B/AKT2/LSS/PRKAA2/RUBCNL/FBXW7/FMO5/PDGFRA/TXNRD1/ABCB4/GPAM/LDLRAP1/ABHD6/WDTC1/LDLR/TM7SF2/AMBRA1/FAM3A/LACTB/ABCA7/SPHK1/TEK/AVIL/STAT5…
GO:0001833	GO:0001833	inner cell mass cell proliferation	12	-0.780396391864773	-1.84473774874904	0.00438965142497355	0.0413881420068935	0.0333471709477244	235	tags=33%, list=2%, signal=33%	NCAPG2/GINS1/GINS4/BRCA2
GO:0055067	GO:0055067	monovalent inorganic cation homeostasis	94	0.428730133778303	1.59414578092051	0.00440310726267	0.0414419215250595	0.0333905020734722	3317	tags=38%, list=24%, signal=29%	AGT/PDK4/KCNJ2/LRRK2/SLC12A7/ATP6AP2/GRN/HVCN1/ATP6AP1L/SLC9A1/AQP11/ATP6AP1/ATP6V1A/MLLT6/SLC9A7/ATP6V0A1/ATP1B3/SLC12A6/SLC26A6/CLN3/SLC12A8/ATP6V1F/TMEM175/CLCN3/SLC12A4/CLN5/ATP6V0B/SLC4A3/SLC9A5/DMXL2/PDK2/ATP6V0D1/SLC4A8/ATP6V1E2/LACC1/CCDC115
GO:2000379	GO:2000379	positive regulation of reactive oxygen species metabolic process	66	0.47257938520128	1.66067045544766	0.0044711571892578	0.0419448218111987	0.0337956978855662	1841	tags=27%, list=13%, signal=24%	AGT/CD36/SOD2/XDH/CDKN1A/INSR/TGFBR2/HVCN1/TGFB1/NOS1AP/SLC5A3/P2RX4/TLR4/GADD45A/ICAM1/NFE2L2/DDAH2/RIPK3
GO:0009617	GO:0009617	response to bacterium	323	0.3168307094545	1.37738150403342	0.00447223128177764	0.0419448218111987	0.0337956978855662	1162	tags=14%, list=8%, signal=13%	FMO1/FAM20A/CD36/PDE4B/CD14/PTGES/RARRES2/H2BC4/GSDMB/HMCN1/SOD2/CCL2/REN/WDR83/APOB/ISG15/HLA-E/ATP2A2/H2BC8/JCHAIN/FABP4/H2BS1/PTGIR/BMP2/PTPN22/H2BC12/H2BC11/CD55/MICA/GRN/RAB29/TGFB1/CD68/SLC17A5/TNIP2/CEBPB/PLCG2/ADM/IRAK1/PLSCR4/LY96/TLR4/OAS2/GPX1/PDCD4
GO:0010092	GO:0010092	specification of animal organ identity	21	0.647848319670399	1.79242686478497	0.0045325743013805	0.0424363261211561	0.0341917117545377	1147	tags=38%, list=8%, signal=35%	LRP2/SPRY1/WNT2/WNT2B/DKK1/BMP2/SMARCD3/BMP4
GO:1902402	GO:1902402	signal transduction involved in mitotic DNA damage checkpoint	52	-0.523528676186759	-1.6849928377239	0.00455124258011284	0.0424623784175973	0.0342127025586878	2166	tags=38%, list=15%, signal=33%	TRIAP1/CNOT6/CHEK2/MDM4/CNOT9/CNOT2/PCBP4/TP53/PRMT1/RPL26/TFDP1/PCNA/CDK2/CASP2/E2F7/AURKA/CCNB1/GTSE1/CDC25C/CDK1
GO:1902403	GO:1902403	signal transduction involved in mitotic DNA integrity checkpoint	52	-0.523528676186759	-1.6849928377239	0.00455124258011284	0.0424623784175973	0.0342127025586878	2166	tags=38%, list=15%, signal=33%	TRIAP1/CNOT6/CHEK2/MDM4/CNOT9/CNOT2/PCBP4/TP53/PRMT1/RPL26/TFDP1/PCNA/CDK2/CASP2/E2F7/AURKA/CCNB1/GTSE1/CDC25C/CDK1
GO:0006816	GO:0006816	calcium ion transport	237	0.332461163126388	1.3965791782812	0.00460707609432153	0.0429084125439772	0.0345720802823468	2398	tags=25%, list=17%, signal=21%	PDE4B/CATSPER2/STC1/RGS4/SLC30A1/CCL2/CACNA1E/ATP2A2/TMC1/PRNP/TRPV1/BEST1/TMEM38B/TPCN1/FYN/CCN2/GEM/TSPAN13/TRPV2/CACNA1C/SLC3A2/WFS1/SLC9A1/NOS1AP/CACHD1/PLCG2/SARAF/GNB5/GPER1/P2RX4/PML/CEMIP/GAS6/PSEN2/STAC/P2RX7/AKAP6/CDK5/SPG7/EHD3/FMR1/F2R/TRPC1/CACNB4/ICAM1/ERO1A/RASA3/TRPV3/PLCG1/ITGAV/STIM2/EPB41/PKD1L2/CUL5/TRPM7/GSTO1/SLC24A1/ORAI3/PKD2/SLC25A23
GO:0030323	GO:0030323	respiratory tube development	122	0.396254030914403	1.52940017329776	0.00461902722260231	0.0429449035339686	0.0346014817297733	1927	tags=28%, list=14%, signal=24%	CHI3L1/RDH10/CTSH/LAMA1/SPRY1/WNT2/WNT2B/TMEM38B/EPAS1/NOG/GATA6/CCN2/TGFBR2/ITGA3/LOX/PTK7/MMP12/FGF7/THRA/BMP4/MME/CELSR1/ERRFI1/SLC7A11/MAN1A2/FGF9/HSD11B1/HEG1/FBXW7/YAP1/PDGFRA/PLOD3/NPHP3/VEGFA
GO:0006363	GO:0006363	termination of RNA polymerase I transcription	30	-0.615797661806183	-1.79512640242571	0.00464661985561699	0.0431264405349452	0.0347477493588902	3840	tags=70%, list=27%, signal=51%	UBTF/POLR2F/MNAT1/ERCC2/GTF2H1/POLR2K/TTF1/POLR1C/CCNH/CDK7/POLR1H/GTF2H5/POLR1E/POLR1G/CAVIN1/ZMPSTE24/TAF1D/GTF2H2/TAF1A/POLR2H/GTF2H3
GO:0055076	GO:0055076	transition metal ion homeostasis	100	0.425715074136535	1.59129496731289	0.00466092316112931	0.043147433225113	0.0347646635471996	1541	tags=20%, list=11%, signal=18%	SLC40A1/MT2A/FTH1/SLC30A1/ISCU/PRNP/CYBRD1/EPAS1/SLC31A2/PRKN/ATP6AP1/ATP6V1A/STEAP2/FTL/MT1X/HYAL2/ACO1/SLC1A1/SLC25A28/STEAP1
GO:1904874	GO:1904874	positive regulation of telomerase RNA localization to Cajal body	15	-0.722084116317082	-1.78385419047094	0.00466502364461566	0.043147433225113	0.0347646635471996	2198	tags=80%, list=16%, signal=68%	CCT7/CCT4/TCP1/CCT6A/NOP10/RUVBL2/CCT8/CCT3/DKC1/SHQ1/CCT5/CCT2
GO:0000712	GO:0000712	resolution of meiotic recombination intermediates	13	-0.755100308421265	-1.83374163661206	0.00475453066315377	0.0438993452939898	0.0353704926345337	1390	tags=54%, list=10%, signal=49%	CENPS/MLH1/CENPX/FANCM/EME1/RMI1/TOP2A
GO:0043408	GO:0043408	regulation of MAPK cascade	465	0.288345121071286	1.29254880216867	0.00476279998087618	0.0438998770651105	0.0353709210920968	2642	tags=25%, list=19%, signal=21%	CHI3L1/CCL7/AGT/CD36/RGS4/DUSP4/GDF15/RGS2/JCAD/FBLN1/GPNMB/CCL2/REN/XDH/ANGPT1/ALKAL1/LMO3/SPRY1/LRRK2/KITLG/IGFBP6/DKK1/SPRED3/INSR/SMPD1/BMP2/PTPN22/RB1CC1/PRKN/ATP6AP2/CCN2/IGFBP4/CD81/MAP4K2/MADD/TGFB1/ATP6AP1/IRAK1/PINK1/SEMA6A/GPER1/NTF3/TPD52L1/ERN1/SFRP1/MAPK10/TLR4/C3orf33/IGFBP3/C1QTNF1/EMC10/GAS6/HIPK2/BMP4/RGS3/PDCD4/HYAL2/GADD45A/SIRT3/P2RX7/CYLD/GAREM1/GPS1/ERRFI1/PTPRR/FGF9/MYDGF/…
GO:0006874	GO:0006874	cellular calcium ion homeostasis	237	0.331075364822839	1.39075781545544	0.00478598615507608	0.0440376626248481	0.0354819373975384	2642	tags=25%, list=19%, signal=21%	CCL7/CD36/STC1/TMEM178A/CXCR6/SLC30A1/ATP2A2/PRNP/PTGER3/TRPV1/TMEM38B/PTGIR/GRIA1/ACKR4/PACS2/TPCN1/TGM2/FYN/CD55/GPR18/TRPV2/CACNA1C/HEXB/WFS1/PLCG2/ADM/GPER1/P2RX4/PML/CEMIP/C1QTNF1/F2RL2/P2RX7/AKAP6/CDK5/F2R/TRPC1/ERO1A/LRP1/PDGFRA/RASA3/CD40/PDZD8/TRPV3/PLCG1/ITGAV/STIM2/ACKR3/CLN3/GSTO1/SLC24A1/PKD2/SLC25A23/JSRP1/VAPB/PRKCE/BNIP3/SLC35G1/APP
GO:0010958	GO:0010958	regulation of amino acid import across plasma membrane	10	0.780593746498809	1.77347205661274	0.00480358870336662	0.0440480020723807	0.035490268076512	120	tags=20%, list=1%, signal=20%	RGS4/RGS2
GO:1903789	GO:1903789	regulation of amino acid transmembrane transport	10	0.780593746498809	1.77347205661274	0.00480358870336662	0.0440480020723807	0.035490268076512	120	tags=20%, list=1%, signal=20%	RGS4/RGS2
GO:0098659	GO:0098659	inorganic cation import across plasma membrane	47	0.508284258285168	1.69905345612071	0.00483897767909545	0.0442208114058876	0.035629503666862	3174	tags=51%, list=23%, signal=40%	KCNJ2/SLC30A1/ISCU/PRNP/TRPV1/SLC12A7/FYN/TRPV2/SLC9A1/KCNJ14/SLC9A7/ATP1B3/KCNJ3/TRPV3/SLC12A6/SLC12A8/HFE/SLC24A1/SLC12A4/WNK3/CACNA2D1/SLC9A5/ABCC9/KCNJ6
GO:0099587	GO:0099587	inorganic ion import across plasma membrane	47	0.508284258285168	1.69905345612071	0.00483897767909545	0.0442208114058876	0.035629503666862	3174	tags=51%, list=23%, signal=40%	KCNJ2/SLC30A1/ISCU/PRNP/TRPV1/SLC12A7/FYN/TRPV2/SLC9A1/KCNJ14/SLC9A7/ATP1B3/KCNJ3/TRPV3/SLC12A6/SLC12A8/HFE/SLC24A1/SLC12A4/WNK3/CACNA2D1/SLC9A5/ABCC9/KCNJ6
GO:0000212	GO:0000212	meiotic spindle organization	10	-0.798985617004691	-1.79881045394114	0.00488091005070451	0.0445278927151302	0.0358769246047833	643	tags=40%, list=5%, signal=38%	MYH9/FBXO5/AURKA/CCNB2
GO:0045165	GO:0045165	cell fate commitment	113	0.413120893716737	1.57375040353305	0.00491285831306095	0.0447429992191206	0.0360502397866859	1780	tags=21%, list=13%, signal=19%	FGF13/GAS1/CYP26B1/WNT2/WNT2B/DKK1/EPAS1/ONECUT2/BMP2/IFRD1/GATA6/LMO4/CTSL/SMO/PML/SFRP1/BMP4/ID2/DLL4/TBX19/TGFBR1/EPOP/HOXA11/IL6
GO:1900182	GO:1900182	positive regulation of protein localization to nucleus	73	-0.469765751363147	-1.59256481613122	0.00492638742877381	0.0447899101942599	0.0360880368036921	783	tags=44%, list=6%, signal=42%	MAPK1/TRIM28/DMAP1/AKT1/EFCAB7/CCT7/JUP/NMD3/RBM22/KAT7/CCT4/LARP7/IPO5/TCP1/ECT2/TARDBP/CCT6A/CCT8/FLNA/CCT3/DKC1/PARK7/FERMT2/HSP90AB1/RAN/CCT5/PARP1/NUTF2/CCT2/PLK1/GTSE1/CDK1
GO:2000104	GO:2000104	negative regulation of DNA-dependent DNA replication	17	-0.707282630697934	-1.79010860627697	0.0049646107459206	0.045060796345826	0.0363062946516077	2216	tags=59%, list=16%, signal=50%	SLFN11/DONSON/CHEK2/BLM/TIMELESS/LIG3/ZRANB3/GMNN/FBXO5/BRCA2
GO:0042475	GO:0042475	odontogenesis of dentin-containing tooth	42	0.533264181508428	1.73365967793366	0.00503961543854315	0.0456640409058503	0.0367923396512374	1147	tags=24%, list=8%, signal=22%	FAM20A/CSF1/FST/BSG/HTRA1/BMP2/PERP/SMO/ADM/BMP4
GO:0031572	GO:0031572	G2 DNA damage checkpoint	32	-0.607787651554696	-1.78522077806697	0.00506614078978767	0.0458267151644753	0.0369234092293368	242	tags=19%, list=2%, signal=18%	CHEK1/BRCA1/PLK1/DTL/CLSPN/CDK1
GO:0030449	GO:0030449	regulation of complement activation	21	0.643453506777082	1.78026756691152	0.00507492111966557	0.045828595111034	0.0369249239361158	1570	tags=48%, list=11%, signal=42%	C1S/SERPING1/CFH/C2/CD55/PROS1/CD81/C1R/CD46/C4B
GO:0001658	GO:0001658	branching involved in ureteric bud morphogenesis	31	0.556567236875528	1.66910566757177	0.00511248511313128	0.0460123660181815	0.037072991463642	2999	tags=48%, list=21%, signal=38%	AGT/WNT2B/BMP2/NOG/SMO/BMP4/GREM1/HOXA11/CTNNBIP1/VEGFA/PKD2/HOXD11/GZF1/PBX1/FGF2
GO:1904645	GO:1904645	response to amyloid-beta	31	0.555641889661399	1.66633061690899	0.00511248511313128	0.0460123660181815	0.037072991463642	1667	tags=39%, list=12%, signal=34%	CD36/MMP2/LGMN/MMP3/PRNP/FYN/ITGA4/MMP12/TLR4/CDK5/ICAM1/LRP1
GO:0098868	GO:0098868	bone growth	16	0.694345739550302	1.7990453329015	0.0052104265376741	0.0468150256645474	0.0377197087875496	996	tags=31%, list=7%, signal=29%	STC1/LEPR/EVC/TGFBR2/TSKU
GO:0089718	GO:0089718	amino acid import across plasma membrane	29	0.589316622686862	1.74763823191256	0.00522897427497591	0.0469028464329215	0.0377904675612883	1634	tags=31%, list=12%, signal=27%	SLC1A2/RGS4/RGS2/SLC3A2/SLC47A1/SLC1A1/SLC6A6/SLC7A11/SLC22A4
GO:0008285	GO:0008285	negative regulation of cell population proliferation	462	0.290988031214432	1.30376772502363	0.00528331964331278	0.0472529009286461	0.0380725127690196	1780	tags=18%, list=13%, signal=16%	PTHLH/LRRC32/PTGES/ACVR1C/EREG/SFRP4/NUPR1/FABP3/FBLN1/FTH1/ATOH8/SOD2/H2AC6/GPNMB/CCL2/XDH/PLXNB1/SPRY1/PRNP/KLF11/CDKN1A/IGFBP6/APOD/PTGIR/BMP2/SCG2/NOG/TSC2/GATA6/IGFBP7/KLF10/TGFBR2/EFEMP2/PLPP1/VGLL4/CCN3/VASH1/STAT1/IRF1/TGFB1/AQP11/CYP1B1/FAP/BMPR1B/SCIN/TP53INP1/CEBPB/ADM/GPER1/PML/TP53I11/SRPX/SFRP1/VDR/GPLD1/IGFBP3/SERPINE2/DDR1/BMP4/PDCD4/H2AC8/P3H2/BAP1/GREM1/SOX4/P3H1/DLL4/TMEM127/RA…
GO:0072698	GO:0072698	protein localization to microtubule cytoskeleton	48	-0.534118161553665	-1.67719245342452	0.0052856780313001	0.0472529009286461	0.0380725127690196	525	tags=15%, list=4%, signal=14%	MAPRE1/STIL/MID1/KIF20B/AURKA/SPAG5/TTK
GO:0070268	GO:0070268	cornification	33	0.560166849834787	1.72327512433986	0.00532965565370888	0.0475665093901965	0.0383251927510355	792	tags=21%, list=6%, signal=20%	PCSK6/KRT33B/KRT38/CYP26B1/KRT23/PERP/KRT40
GO:0001765	GO:0001765	membrane raft assembly	10	-0.795388319431141	-1.79071161418292	0.00540252438347578	0.0481364922567692	0.0387844382055841	853	tags=50%, list=6%, signal=47%	PACSIN2/EMP2/CAV1/ANXA2/S100A10
GO:0044057	GO:0044057	regulation of system process	319	0.314355541552261	1.362221474976	0.0054377436879842	0.0483696801263952	0.0389723218692203	1880	tags=20%, list=13%, signal=18%	AGT/KCNH6/FGF13/PDE4B/STC1/KCNJ2/RGS4/RGS2/MYL3/REN/LRRK2/ATP2A2/PTGER3/TMEM38B/NPTX1/TNNT2/EPAS1/LMCD1/JAM2/TNNI3K/FBXO32/CCN2/CACNA1C/CCN3/HSPB7/SLC9A1/KCNJ14/NOS1AP/ADM/SGK1/NPR2/GPER1/P2RX4/CHRM3/KCND2/C1QTNF1/MEF2A/GAS6/THRA/GLS/KCNMB2/ECE1/SLC1A1/MECP2/TSHZ3/ERRFI1/DSP/AKAP6/EHD3/FMR1/F2R/TRPC1/CACNB4/ICAM1/SMAD7/UTRN/ATP1B3/IL6ST/GAA/S1PR2/KCNJ3/POPDC2/CELF4/MYRF
GO:0072503	GO:0072503	cellular divalent inorganic cation homeostasis	256	0.325596468542733	1.38651633863703	0.00545167768677687	0.0484130712848989	0.0390072829066112	2642	tags=25%, list=19%, signal=21%	CCL7/CD36/STC1/TMEM178A/MT2A/CXCR6/SLC30A1/ATP2A2/PRNP/PTGER3/TRPV1/TMEM38B/PTGIR/GRIA1/ACKR4/PACS2/TPCN1/TGM2/FYN/CD55/GPR18/TRPV2/CACNA1C/HEXB/WFS1/PLCG2/ADM/GPER1/P2RX4/PML/CEMIP/C1QTNF1/MT1X/F2RL2/SLC1A1/P2RX7/AKAP6/CDK5/F2R/TRPC1/ERO1A/LRP1/PDGFRA/RASA3/CD40/PDZD8/TRPV3/PLCG1/ITGAV/STIM2/ACKR3/CLN3/TRPM7/GSTO1/SLC24A1/PKD2/SLC25A23/SLC41A1/JSRP1/VAPB/PRKCE/BNIP3/SLC35G1/APP
GO:0006658	GO:0006658	phosphatidylserine metabolic process	21	0.641599259164931	1.77513734872144	0.00553979073995205	0.0491139656646495	0.0395720061235642	1610	tags=48%, list=11%, signal=42%	PLA2G4A/OSBPL10/SERINC2/PTDSS1/PTDSS2/OSBPL8/ABHD16A/SLC27A1/PLA2G15/LPCAT4
GO:0060071	GO:0060071	Wnt signaling pathway, planar cell polarity pathway	91	-0.441797568136767	-1.56154841973298	0.00563285279216108	0.0498563427597569	0.0401701527109152	2486	tags=38%, list=18%, signal=32%	SMURF2/RAC1/FZD2/DVL1/PSMA7/PSMD10/PSMD3/DAAM1/AP2B1/PSMC5/PSMC6/RHOA/PSME3/PSMB4/PSMA1/PSME2/PSMB6/PSMA2/PSMD14/PSMD11/PSMA6/PSMA3/PSMB5/PSMB3/PSMC2/PSMB7/PSMC1/AP2S1/PFN1/PSMB1/PSMB9/PSMA5/PSMB2/PSMA4/CDC42
GO:0140354	GO:0140354	lipid import into cell	28	0.589536199136666	1.7354517038843	0.00571867494028715	0.0505322912905374	0.0407147766083602	1716	tags=29%, list=12%, signal=25%	CD36/SLC1A2/FABP3/SLC2A1/SLC1A1/SLC27A1/SLC7A11/AKT2
GO:0003071	GO:0003071	renal system process involved in regulation of systemic arterial blood pressure	12	0.739271509091682	1.77236147217726	0.00574045591650509	0.0506013933189443	0.0407704533563943	1608	tags=42%, list=11%, signal=37%	AGT/SUCNR1/REN/GAS6/F2R
GO:0003205	GO:0003205	cardiac chamber development	112	0.39676630007396	1.5131322205977	0.00574542569109599	0.0506013933189443	0.0407704533563943	1699	tags=24%, list=12%, signal=21%	LRP2/MYL3/DHRS3/WNT2/TNNT2/BMP2/NOG/GATA6/LMO4/SEMA3C/TGFBR2/SMO/TGFB1/PTK7/FHL2/SMARCD3/BMP4/SOS1/SOX4/CPE/DLL4/CRELD1/DSP/TGFBR1/TGFBR3/SMAD7/HEG1
GO:0043414	GO:0043414	macromolecule methylation	256	-0.348581540944208	-1.41193481536819	0.0057965293872026	0.0509675100394491	0.0410654401877303	3841	tags=38%, list=27%, signal=28%	SNRPB/SMYD2/MRM2/RBM15/BEND3/ASH2L/FTSJ3/TET2/VIRMA/RIF1/TRIM28/DMAP1/SUPT6H/ARMT1/EEF1AKMT1/GSK3A/MIS18A/MTRR/TRMT2B/TRMT11/PCMT1/TFB1M/PRMT3/CTNNB1/CHTOP/ETF1/METTL14/LARP7/CARM1/RAB3D/METTL1/WDR5/ATPSCKMT/EED/PAXBP1/CSKMT/SNW1/PCIF1/DNMT3A/SMAD4/METTL2A/METTL15/METTL5/BRD4/CAMKMT/EEF1AKMT2/RAMAC/METTL6/KDM1A/SPOCD1/TYW3/EHMT1/PRORP/PAX5/SMARCB1/SUV39H1/AASS/CREBBP/PWP1/MTO1/WDR5B/NSUN3/FOS/ZMP…
GO:0008217	GO:0008217	regulation of blood pressure	90	0.426105421708312	1.57694416831316	0.00584979219735831	0.0512898190018016	0.0413251303198402	1608	tags=23%, list=11%, signal=21%	AGT/SUCNR1/RARRES2/SOD2/REN/NISCH/AGTRAP/ATP6AP2/SCPEP1/ADM/SGK1/NPR2/P2RX4/GAS6/PRCP/MME/ECE1/ID2/MECP2/MKKS/F2R
GO:0032210	GO:0032210	regulation of telomere maintenance via telomerase	48	-0.530593528225752	-1.66612469942516	0.00585325951022824	0.0512898190018016	0.0413251303198402	1590	tags=35%, list=11%, signal=32%	CCT4/HNRNPC/NAT10/NEK7/TCP1/HNRNPU/CCT6A/XRCC5/CCT8/GNL3L/CCT3/DKC1/CCT5/CCT2/HNRNPA1/AURKB/NEK2
GO:0051180	GO:0051180	vitamin transport	25	0.609450967942599	1.76236758772014	0.00586196771606824	0.0512898190018016	0.0413251303198402	1480	tags=24%, list=11%, signal=22%	LRP2/FOLR3/TCN2/SLC2A1/SLC27A1/SLC25A19
GO:1900026	GO:1900026	positive regulation of substrate adhesion-dependent cell spreading	35	-0.576383865266067	-1.70924415317725	0.00590159576888633	0.0515521748046835	0.0415365151122856	2452	tags=49%, list=17%, signal=40%	FGA/ARPC2/CALR/MYADM/RAC1/DOCK5/LIMS1/FLNA/CARMIL1/C1QBP/FERMT2/CDC42/PREX1/FGG/FGB/S100A10/HAS2
GO:0072527	GO:0072527	pyrimidine-containing compound metabolic process	68	-0.495785852787477	-1.65980647775069	0.00592702823249043	0.0516053505898817	0.0415793597995148	1853	tags=31%, list=13%, signal=27%	DCTPP1/PUDP/TDG/ALDH6A1/UMPS/CPS1/NME2/CTPS1/ACP3/TET1/NME7/OGG1/TPK1/ERH/DCK/RRM1/NME1/TYMS/PRPS1/TK1/APOBEC3B
GO:0007040	GO:0007040	lysosome organization	59	0.472218760999056	1.62501821393711	0.00593664246404363	0.0516053505898817	0.0415793597995148	2473	tags=34%, list=18%, signal=28%	LRRK2/FHIP1B/GNPTAB/ATP6AP2/GRN/SYT7/HEXB/SCARB2/MBTPS1/TPP1/SRPX/HPS1/VPS18/HOOK3/GAA/ARSB/CLN3/TMEM175/CLN5/TMEM106B
GO:0080171	GO:0080171	lytic vacuole organization	59	0.472218760999056	1.62501821393711	0.00593664246404363	0.0516053505898817	0.0415793597995148	2473	tags=34%, list=18%, signal=28%	LRRK2/FHIP1B/GNPTAB/ATP6AP2/GRN/SYT7/HEXB/SCARB2/MBTPS1/TPP1/SRPX/HPS1/VPS18/HOOK3/GAA/ARSB/CLN3/TMEM175/CLN5/TMEM106B
GO:0072078	GO:0072078	nephron tubule morphogenesis	40	0.529003918691228	1.68561095358055	0.00595208671420525	0.0516556096982813	0.041619854467751	2999	tags=45%, list=21%, signal=35%	AGT/KLHL3/WNT2B/BMP2/NOG/SMO/KIF26B/BMP4/GREM1/HOXA11/CTNNBIP1/VEGFA/PKD2/AHI1/HOXD11/GZF1/PBX1/FGF2
GO:1903053	GO:1903053	regulation of extracellular matrix organization	37	0.545872573134944	1.70583746623832	0.00598749165003116	0.0518786553663964	0.0417995663770835	2294	tags=43%, list=16%, signal=36%	AGT/DPP4/ANTXR1/BMP2/RUNX1/CST3/EFEMP2/TGFB1/FAP/DDR1/LRP1/PHLDB1/IL6/AEBP1/PDPN/DAG1
GO:0071715	GO:0071715	icosanoid transport	22	0.624523720632333	1.75321228717847	0.00602989066859778	0.0521614814147633	0.0420274444147541	975	tags=27%, list=7%, signal=25%	PTGES/PLA2G4A/ABCC3/PLA2R1/SLCO2A1/P2RX4
GO:0090190	GO:0090190	positive regulation of branching involved in ureteric bud morphogenesis	10	0.775049893106058	1.76087668402348	0.00605029992938444	0.0522534788731651	0.0421015684228231	1927	tags=60%, list=14%, signal=52%	AGT/WNT2B/NOG/SMO/GREM1/VEGFA
GO:1904062	GO:1904062	regulation of cation transmembrane transport	208	0.343682127248508	1.424062391736	0.00607063846606369	0.0523445697412524	0.0421749619747583	1706	tags=20%, list=12%, signal=18%	FGF13/PDE4B/KCNJ2/RGS4/RGS2/SLC30A1/AMIGO1/CCL2/ISCU/TMC1/PRNP/TMEM38B/GRIA1/SLC31A2/PCSK9/CTSS/FYN/GEM/TSPAN13/CACNA1C/GRIA4/SLC9A1/NOS1AP/STOM/PLCG2/PINK1/GNB5/GPER1/CEMIP/KLHL24/PSEN2/STAC/AKAP6/CDK5/EHD3/FMR1/F2R/TRPC1/SLMAP/CACNB4/UTRN/ATP1B3
GO:0007033	GO:0007033	vacuole organization	153	0.372068175991253	1.46953904947821	0.00609940926448105	0.0525079580159673	0.0423066068484727	2473	tags=29%, list=18%, signal=24%	NUPR1/LRRK2/FHIP1B/PACS2/RB1CC1/GNPTAB/ATP6AP2/GRN/SYT7/HEXB/ATG16L2/SCARB2/SYNPO2/MBTPS1/TP53INP1/TPP1/PINK1/SRPX/ENO3/ATG101/MAP1LC3B2/ENO2/GABARAPL1/TMEM41B/HPS1/PIP4K2B/WDR45B/ADPRH/VPS18/HOOK3/GAA/GABARAPL2/SMURF1/ARSB/AMBRA1/WIPI2/CLN3/FEZ1/TMEM175/MAP1LC3B/CLN5/RAB3GAP2/VPS11/TMEM106B
GO:0010884	GO:0010884	positive regulation of lipid storage	17	0.683088237285322	1.79752598882491	0.00614738645881504	0.0528345884400642	0.0425697788600907	1589	tags=29%, list=11%, signal=26%	CD36/APOB/MSR1/PLIN2/ACACB
GO:0001503	GO:0001503	ossification	277	0.314714407071143	1.34831332578736	0.00615711720878414	0.0528345884400642	0.0425697788600907	1986	tags=20%, list=14%, signal=18%	PTHLH/FASN/STC1/MGP/CSF1/MMP2/ITGA11/ISG15/PLXNB1/ADGRV1/DHRS3/TMEM38B/ASPN/DKK1/BMP2/RUNX1/NOG/CSGALNACT1/KLF10/CCN2/ANKH/TWIST2/LOX/SPP1/SMO/TGFB1/BMPR1B/FHL2/ATP6AP1/CEBPB/NPR2/GPM6B/COL6A1/SFRP1/GPLD1/IGFBP3/THRA/BMP4/SORT1/GREM1/P2RX7/MESD/DNAI3/SEMA4D/SMAD7/CTNNBIP1/RASSF2/IL6ST/IL6/TAPT1/YAP1/ACVR2B/ATRAID/JUNB/CTHRC1/MRC2
GO:1902806	GO:1902806	regulation of cell cycle G1/S phase transition	139	-0.413395001003239	-1.55148016912142	0.00623715173921051	0.0534355980734285	0.0430540231390847	2280	tags=29%, list=16%, signal=24%	TMEM14B/SLFN11/TRIAP1/CNOT6/APPL2/CHEK2/MDM4/CNOT9/CDKN2B/CTDSPL/CNOT2/PSME3/SUSD2/PSME2/CDK6/RPTOR/PCBP4/TP53/PRMT1/RPL26/INO80/TFDP1/PLRG1/ANXA1/PCNA/STXBP4/CDK2/CASP2/FHL1/CDKN2C/RBL1/EZH2/E2F7/AURKA/CCNB1/CDC6/GTSE1/CDC25C/CDK1/KIF14
GO:0023061	GO:0023061	signal release	278	0.318935737134062	1.3655177004929	0.00632647404280655	0.0541141283725501	0.0436007272137506	1827	tags=18%, list=13%, signal=16%	AGT/DPP4/PPFIA4/PTGES/SUCNR1/ACVR1C/SLC30A1/PLA2G4A/REN/CACNA1E/LRRK2/ATP2A2/PFKFB2/ANO1/NISCH/ARL2/PRKN/SYT7/CACNA1C/CCN3/SPP1/SCG5/ADM/PINK1/GPER1/P2RX4/SLC2A1/SFRP1/GPLD1/SLC25A4/C1QTNF1/SELENOM/SYTL4/PORCN/SIRT3/SNCAIP/SOX4/SLC9B2/SNAP25/CDK5/CADPS/FMR1/RAB11FIP2/NADK/F2R/LRP1/VPS18/IL6/MCTP1
GO:1903530	GO:1903530	regulation of secretion by cell	334	0.303634732915867	1.31579960145664	0.00634449598086626	0.0541815902774937	0.0436550824847902	1827	tags=17%, list=13%, signal=15%	AGT/DPP4/PTGES/ACVR1C/SLC30A1/PLA2G4A/REN/CACNA1E/LRRK2/ATP2A2/EXPH5/PFKFB2/ANO1/SCAMP5/BMP2/ARL2/PAM/PRKN/SYT7/CACNA1C/CCN3/SPP1/TGFB1/ATP6AP1/SCG5/PINK1/GPER1/P2RX4/SLC2A1/RAB9A/SFRP1/GPLD1/SERGEF/SDC1/TLR4/SLC25A4/C1QTNF1/RAB3B/SYTL4/SEPTIN4/SIRT3/SNCAIP/SOX4/APBB1/P3H1/CYP51A1/SLC9B2/SNAP25/CDK5/CADPS/FMR1/NADK/F2R/LAMP1/LRP1/VPS18/IL6/MCTP1
GO:0007163	GO:0007163	establishment or maintenance of cell polarity	164	-0.379332675177668	-1.46789104790739	0.00636243945356873	0.0542481679725334	0.0437087253319957	1952	tags=24%, list=14%, signal=21%	SYNJ2BP/MAP1B/CKAP5/SLC9A3R1/PDLIM1/RHOA/FRMD4A/WDR1/AMOT/CYRIB/ACTR2/ARF4/PAFAH1B1/RPGRIP1L/CAP1/MSN/DYNLT1/GPSM2/ARPC5/HES1/RACK1/ACTB/LIN7A/HSP90AB1/MYH9/PDZD11/CDC42/LMNA/FSCN1/CENPA/DOCK2/TCIRG1/KIF20B/EPHB1/MAD2L1/SPDL1/PLK1/NDC80/KIF2C
GO:0003229	GO:0003229	ventricular cardiac muscle tissue development	33	0.555421268517702	1.7086760058153	0.00641891063936794	0.0546425099969125	0.0440264537986819	1699	tags=33%, list=12%, signal=29%	LRP2/MYL3/TNNT2/NOG/TGFB1/DLL4/DSP/TGFBR1/TGFBR3/SMAD7/HEG1
GO:0032516	GO:0032516	positive regulation of phosphoprotein phosphatase activity	17	-0.700014020175591	-1.77171199693442	0.00648658434314477	0.0551308106493672	0.0444198864231418	1985	tags=41%, list=14%, signal=35%	PPP1R12A/CALM3/PPP1R15B/CALM2/HSP90AB1/PTPRC/SLC39A10
GO:0006913	GO:0006913	nucleocytoplasmic transport	296	-0.339396369860662	-1.39586184646945	0.00657156004348366	0.0557643809404185	0.0449303654100838	3625	tags=40%, list=26%, signal=30%	POLDIP3/MAPK1/TRIM28/DMAP1/AGFG1/IL1B/AKT1/HSPA9/XPO5/SUPT6H/ANP32B/NUP153/SRSF6/NOL6/NUP107/EFCAB7/PPP3CA/FERMT1/SNUPN/GLE1/NUP205/SRSF4/JUP/PPP1CC/POLR2D/NMD3/RBM22/APPL1/CALR/CHTOP/TMCO6/SRSF9/NXT2/SSB/KPNA5/HIKESHI/IPO5/UPF3B/TCF7L2/CPSF3/HTATIP2/ALYREF/XPO1/DDX19B/HEATR3/NUP93/RAE1/APPL2/PABPN1/GEMIN6/ECT2/RBM4/PPP1R12A/NUP88/TSC1/FYTTD1/NUP85/NCBP1/CSE1L/TARDBP/IPO4/XPOT/SEH1L/PHAX/NDC1/RIO…
GO:0042773	GO:0042773	ATP synthesis coupled electron transport	96	-0.440455540559518	-1.56809341500891	0.00666902652100882	0.0565017682746642	0.0455244916572993	2605	tags=36%, list=19%, signal=30%	SDHAF2/NDUFB1/COX7C/NDUFA4/COX2/COX10/NDUFA1/NDUFAF1/NDUFB2/COX15/NDUFA6/COX6B1/NDUFS5/NDUFS1/SDHD/COX6C/UQCRQ/NDUFB7/UQCRH/CYC1/UQCR10/UQCRC2/NDUFA12/NDUFS4/UQCRHL/NDUFB9/DLD/COX7B/DNAJC15/NDUFB3/PARK7/NDUFA9/CYCS/CCNB1/CDK1
GO:0051443	GO:0051443	positive regulation of ubiquitin-protein transferase activity	32	-0.594634284223533	-1.74658612565	0.00674318480484458	0.0570396613397138	0.0459578817811859	1426	tags=25%, list=10%, signal=23%	BTRC/UBE2L3/RPS2/UBE2N/UBE2S/PLK1/CDC20/UBE2C
GO:0006353	GO:0006353	DNA-templated transcription, termination	72	-0.471910449661927	-1.59800722266101	0.00675593184606356	0.0570572063966127	0.0459720181493175	3914	tags=56%, list=28%, signal=40%	TTF2/SNRPB/UBTF/DHX9/POLR2F/MNAT1/ERCC2/GTF2H1/POLR2A/POLR2K/TTF1/XRN2/POLR1C/CCNH/POLR3K/CPSF3/CDK7/POLR1H/PABPN1/GTF2H5/POLR1E/CSTF1/NCBP1/POLR1G/CAVIN1/MED18/SLBP/ZMPSTE24/PRMT5/SNRPD3/TAF1D/GTF2H2/SNRPF/TAF1A/POLR2H/SNRPG/WDR33/GTF2H3/SNRPE/CSTF3
GO:0032330	GO:0032330	regulation of chondrocyte differentiation	36	0.555125656844691	1.7173270573492	0.0068511101655822	0.057682058102221	0.0464754724150449	1710	tags=28%, list=12%, signal=24%	PTHLH/EFEMP1/CCN2/BMPR1B/SCIN/BMP4/GREM1/TGFBR1/SMAD7/HOXA11
GO:0072202	GO:0072202	cell differentiation involved in metanephros development	12	0.731435832168976	1.75357588161217	0.00685149773567347	0.057682058102221	0.0464754724150449	2456	tags=58%, list=18%, signal=48%	LAMB2/STAT1/SMO/BMP4/GREM1/YAP1/LIF
GO:0006284	GO:0006284	base-excision repair	37	-0.570777168332315	-1.7262421516196	0.00688783605999673	0.0578968106552555	0.0466485024122916	1258	tags=32%, list=9%, signal=30%	TDG/HMGB1/PRMT6/OGG1/PCNA/LIG3/RPS3/RPA3/DNA2/FEN1/NEIL3/POLQ
GO:0050900	GO:0050900	leukocyte migration	241	0.327522956985239	1.37599978250397	0.00692712292411174	0.0581356344620116	0.0468409270519131	2018	tags=22%, list=14%, signal=20%	CCL7/PDE4B/DPP4/RARRES2/CSF1/LGMN/CCL2/APOB/ANGPT1/PADI2/KITLG/JCHAIN/BSG/APOD/JAM2/PIK3R1/SCG2/DOCK8/FYN/TNFRSF10D/CAMK1D/PROS1/CCN3/SLC3A2/ITGA3/CD81/SDC3/ITGA4/TGFB1/ANGPT2/TNFRSF10A/MTUS1/P2RX4/CD47/SDC1/GAS6/SOS1/GREM1/WASL/MIA3/SLC7A11/VAV3/ICAM1/SLC7A7/ATP1B3/CCL26/JAM3/IL27RA/IL6/RIPK3/VEGFA/PLCG1/ITGA2/ITGAV
GO:0001822	GO:0001822	kidney development	210	0.345264195750269	1.43061305376565	0.00694409750583689	0.0581867480661505	0.0468821102027463	1927	tags=21%, list=14%, signal=18%	AGT/LRP2/SULF2/KLHL3/AKR1B1/RDH10/CTSH/CYP26B1/REN/ANGPT1/SPRY1/LRRK2/WNT2B/LAMB2/BMP2/PCSK9/NOG/TIPARP/ITGA3/WFS1/STAT1/SMO/PTK7/AQP11/ANGPT2/KIF26B/ZNF354A/SFRP1/SDC1/IFT27/BMP4/MME/HYAL2/GREM1/SOX4/GCNT4/TGFBR1/SMAD7/HOXA11/CTNNBIP1/YAP1/PDGFRA/NPHP3/VEGFA
GO:0001974	GO:0001974	blood vessel remodeling	31	0.54416452303168	1.63191080844522	0.00696421819487013	0.0582640226444064	0.0469443717212891	1413	tags=29%, list=10%, signal=26%	AGT/EPAS1/TGM2/CST3/SEMA3C/CRB1/TGFB1/TMBIM1/DLL4
GO:0001823	GO:0001823	mesonephros development	59	0.46663168760364	1.60579175200886	0.00703746199436726	0.058784799721699	0.0473639711857744	2999	tags=37%, list=21%, signal=29%	AGT/REN/SPRY1/WNT2B/BMP2/NOG/SMO/KIF26B/SFRP1/SDC1/BMP4/GREM1/SMAD7/HOXA11/CTNNBIP1/VEGFA/PKD2/HOXD11/GZF1/OSR2/PBX1/FGF2
GO:0018146	GO:0018146	keratan sulfate biosynthetic process	19	0.65922868825182	1.79062048261256	0.0070525124887439	0.0588186142976987	0.0473912161982758	1464	tags=37%, list=10%, signal=33%	FMOD/PRELP/CHST2/B4GAT1/ST3GAL3/LUM/ST3GAL6
GO:2000351	GO:2000351	regulation of endothelial cell apoptotic process	35	0.545358682093425	1.6918597454081	0.00708936005773999	0.0590338300135171	0.0475646193741138	1953	tags=43%, list=14%, signal=37%	ANGPTL4/CCL2/ANGPT1/SCG2/SEMA5A/ITGA4/TNIP2/GPER1/GAS6/PDCD4/MAPK7/ICAM1/NFE2L2/CD40/PLCG1
GO:0070372	GO:0070372	regulation of ERK1 and ERK2 cascade	172	0.352709349009691	1.42046386672046	0.00720373926319376	0.0598929861602393	0.048256856945222	1832	tags=20%, list=13%, signal=17%	CHI3L1/CCL7/CD36/DUSP4/FBLN1/GPNMB/CCL2/ANGPT1/ALKAL1/LMO3/SPRY1/SPRED3/BMP2/PTPN22/CCN2/TGFB1/ATP6AP1/SEMA6A/GPER1/TLR4/C3orf33/GAS6/BMP4/SIRT3/GAREM1/ERRFI1/PTPRR/F2R/ICAM1/LRP1/GCNT2/CCL26/FBXW7/PDGFRA
GO:0007096	GO:0007096	regulation of exit from mitosis	14	-0.72574512516322	-1.77766482156287	0.00721508996471708	0.0598942095518284	0.0482578426538449	1261	tags=43%, list=9%, signal=39%	NPM2/CDC23/KNTC1/CDCA5/UBE2C/ANLN
GO:0051004	GO:0051004	regulation of lipoprotein lipase activity	12	0.728591109997366	1.74675582170995	0.00729591501398365	0.0604712583949714	0.0487227812928945	115	tags=25%, list=1%, signal=25%	PCSK6/ANGPTL4/HDAC9
GO:0007613	GO:0007613	memory	61	0.463941306609218	1.62008019003521	0.00732179581566002	0.0605918272918243	0.0488199258231723	982	tags=21%, list=7%, signal=20%	FGF13/BRINP1/LGMN/NFATC4/PRNP/INSR/GRIA1/VLDLR/ITGA3/CTNS/CEBPB/SGK1/NTF3
GO:0072413	GO:0072413	signal transduction involved in mitotic cell cycle checkpoint	54	-0.527741953040374	-1.70877926549721	0.00737345441079853	0.0609250189801065	0.0490883843634387	2166	tags=39%, list=15%, signal=33%	TRIAP1/CNOT6/CHEK2/MDM4/CNOT9/CNOT2/PCBP4/TP53/PRMT1/RPL26/TFDP1/PCNA/CDK2/CASP2/ZWILCH/E2F7/AURKA/CCNB1/GTSE1/CDC25C/CDK1
GO:0043039	GO:0043039	tRNA aminoacylation	47	-0.518194114289741	-1.61114203243614	0.00742925645729337	0.061221352567744	0.0493271456686176	2927	tags=60%, list=21%, signal=47%	SARS2/QRSL1/GATC/GATB/NARS1/AARSD1/DARS1/MARS1/FARS2/GARS1/PPA2/EPRS1/YARS2/LARS1/IARS1/AIMP1/QARS1/KARS1/TARS1/RARS1/WARS2/AIMP2/EARS2/VARS1/WARS1/EEF1E1/DARS2/FARSB
GO:0006998	GO:0006998	nuclear envelope organization	50	-0.529122668538714	-1.68426207045824	0.00744367361934785	0.061221352567744	0.0493271456686176	2456	tags=32%, list=18%, signal=26%	PARP11/TMEM43/PPP2CA/LEMD2/NUP93/TARDBP/PRKCA/ZMPSTE24/NUP155/BANF1/LMNA/VRK1/CCNB1/PLK1/CCNB2/CDK1
GO:0060218	GO:0060218	hematopoietic stem cell differentiation	76	-0.468215725440907	-1.59908163391349	0.00744367361934785	0.061221352567744	0.0493271456686176	3636	tags=53%, list=26%, signal=39%	PSME4/ERCC2/PRKDC/PSMC4/HSPA9/LDB1/PSME1/OCIAD1/TCF3/EXT1/MEOX1/PSMA7/PSMD10/PSMD3/PSMC5/PUS7/PSMC6/PSME3/PSMB4/PSMA1/PSME2/PSMB6/PSMA2/XRCC5/TP53/PSMD14/PSMD11/PSMA6/PSMA3/PSMB5/PSMB3/PSMC2/PSMB7/PSMC1/PSMB1/PSMB9/PSMA5/PSMB2/MYB/PSMA4
GO:0044242	GO:0044242	cellular lipid catabolic process	160	0.354514645633007	1.41154420071934	0.00746817366917143	0.0613285045090483	0.0494134799163222	2874	tags=35%, list=21%, signal=28%	LIPG/ASAH1/FABP3/CYP26B1/PLA2G4A/APOB/AKR1B10/HEXA/FABP4/PLA2G4C/NEU1/SMPD1/IVD/PLBD1/FUCA1/ACAD11/TYSND1/HEXB/CYP1B1/ABHD16A/PLCG2/GM2A/GPLD1/PHYH/PLA2G15/ACOT8/PDXDC2P-NPIPB14P/ACACB/CROT/LRP1/ACAA1/AKT2/GDPD1/GDE1/LPIN2/PLCG1/ABHD6/LDLR/BCO2/PLBD2/GDPD3/SESN2/ALDH3A2/SPHK1/GALC/ABCD4/ACOX3/ACADVL/SIRT2/ABHD12/BDH2/ETFDH/ECH1/LPIN3/INPP5F/MLYCD
GO:0030514	GO:0030514	negative regulation of BMP signaling pathway	34	0.548348959785823	1.69066048706958	0.00750924240223958	0.0615711808011853	0.0496090085727549	1833	tags=26%, list=13%, signal=23%	LRP2/HTRA1/NOG/SFRP1/HIPK2/SKIL/GREM1/SMAD7/SMURF1
GO:0000460	GO:0000460	maturation of 5.8S rRNA	35	-0.563682840733587	-1.67157975410271	0.00759993394341812	0.0620122715441014	0.0499644033233826	4043	tags=60%, list=29%, signal=43%	EXOSC10/EXOSC3/RPF1/C1D/FTSJ3/PRKDC/RPP40/MTREX/NOP14/NOL9/UTP20/WDR12/NSA2/EXOSC7/EIF6/RRP15/MAK16/RPS21/EXOSC2/EXOSC8/EXOSC9
GO:0007063	GO:0007063	regulation of sister chromatid cohesion	21	-0.664982604435935	-1.76729900352812	0.00759993394341812	0.0620122715441014	0.0499644033233826	3007	tags=48%, list=21%, signal=37%	CTNNB1/WAPL/NSMCE2/SLF1/RAD21/SFPQ/SMC5/FEN1/CDCA5/BUB1
GO:0001525	GO:0001525	angiogenesis	352	0.303877343105452	1.32533752000545	0.00760360131725331	0.0620122715441014	0.0499644033233826	2141	tags=23%, list=15%, signal=20%	CHI3L1/ANGPTL4/TGFBI/LEPR/SAT1/EREG/MMP2/ITGB8/HDAC9/JCAD/GPNMB/CTSH/ANGPTL2/CCL2/NFATC4/ANGPT1/KLF5/PLXDC1/BSG/COL8A2/APOD/EPAS1/RUNX1/SCG2/GATA6/SEMA5A/CCN2/TGFBR2/GRN/CCN3/VASH1/STAT1/CYP1B1/FAP/ANGPT2/ADM/SP100/MFGE8/SEMA6A/PML/SFRP1/GPLD1/ZNF304/EMC10/HIPK2/PRCP/GPX1/BMP4/GADD45A/GREM1/EGR3/MECP2/PIK3R3/MIA3/DLL4/RECK/MAPK7/TGFBR1/CALD1/MYDGF/TGFBR3/VAV3/EPN1/COL15A1/NFE2L2/PTPRM/JAM3/FBXW7/…
GO:1901385	GO:1901385	regulation of voltage-gated calcium channel activity	20	0.640014270775668	1.77401642852869	0.00760943698708016	0.0620122715441014	0.0499644033233826	1643	tags=45%, list=12%, signal=40%	PDE4B/GEM/NOS1AP/GNB5/STAC/CDK5/EHD3/FMR1/CACNB4
GO:0032760	GO:0032760	positive regulation of tumor necrosis factor production	47	0.492439681330635	1.64608942507597	0.00765849193485125	0.0623170439630362	0.0502099639468258	2686	tags=34%, list=19%, signal=28%	CD36/CD14/NFATC4/HLA-E/IFIH1/PIK3R1/DDX58/LY96/TLR4/IL6/MIF/IFNGR1/CLU/RIPK2/APP/THBS1
GO:0060706	GO:0060706	cell differentiation involved in embryonic placenta development	13	-0.736445402100722	-1.78843867743489	0.00768796406631486	0.0624060502624721	0.050281677924279	995	tags=23%, list=7%, signal=21%	KRT8/E2F7/PLK4
GO:0051444	GO:0051444	negative regulation of ubiquitin-protein transferase activity	16	-0.705962058192329	-1.76067649956279	0.00769277723961263	0.0624060502624721	0.050281677924279	1362	tags=44%, list=10%, signal=40%	RPL5/RPL11/RPL23/PARK7/RPS7/FBXO5/MAD2L1
GO:0006977	GO:0006977	DNA damage response, signal transduction by p53 class mediator resulting in cell cycle arrest	50	-0.527874044849991	-1.68028754877501	0.0077219338372788	0.0625476640819583	0.0503957787275038	2166	tags=40%, list=15%, signal=34%	TRIAP1/CNOT6/CHEK2/MDM4/CNOT9/CNOT2/PCBP4/TP53/PRMT1/RPL26/TFDP1/PCNA/CDK2/CASP2/E2F7/AURKA/CCNB1/GTSE1/CDC25C/CDK1
GO:0009313	GO:0009313	oligosaccharide catabolic process	10	0.766265059911929	1.74091795867925	0.00773847690638261	0.0625868344047223	0.0504273389615696	1011	tags=60%, list=7%, signal=56%	MANBA/NEU1/MAN2B2/MAN2B1/HEXB/GM2A
GO:0009060	GO:0009060	aerobic respiration	79	-0.458863777269706	-1.58404107262802	0.00780272591221866	0.0630111370494274	0.0507692072393047	3271	tags=47%, list=23%, signal=36%	SDHB/COX7A2L/ME2/UQCRB/PDHA1/SHMT2/IDH3B/SDHAF2/COX7C/SUCLA2/SUCLG2/NDUFA4/BLOC1S1/COX2/COX10/OGDH/IDH2/DLAT/COX15/ATP5F1D/SLC25A14/COX6B1/SDHD/COX6C/MDH1/UQCRH/UQCR10/UQCRC2/PDHB/SUCLG1/UQCRHL/DLD/IDH1/COX7B/CS/CYCS/MTFR2
GO:0035404	GO:0035404	histone-serine phosphorylation	10	-0.785202634098665	-1.76777989067418	0.00786303991493605	0.0634024304453215	0.0510844793711492	223	tags=60%, list=2%, signal=59%	RPS6KA4/PRKAA1/VRK1/AURKA/CCNB1/AURKB
GO:0045738	GO:0045738	negative regulation of DNA repair	35	-0.56315088995598	-1.67000227455966	0.00788403550180183	0.0634759846274587	0.0511437432995769	2203	tags=34%, list=16%, signal=29%	OTUB1/SHLD2/TWIST1/CGAS/OGG1/AUNIP/PARPBP/RPS3/FANCB/SHLD1/RMI2/POLQ
GO:0009451	GO:0009451	RNA modification	151	-0.382491992445063	-1.45552351911672	0.00794764421481767	0.063825826682209	0.0514256173397915	3312	tags=31%, list=24%, signal=24%	TRMT2B/TRMT11/TFB1M/APOBEC3C/PUSL1/METTL14/LARP7/QTRT2/METTL1/SSB/NAT10/ELP4/OSGEPL1/APOBEC3D/PCIF1/FTO/METTL2A/METTL15/METTL5/GAR1/RAMAC/CDKAL1/METTL6/TYW3/PRORP/TRMU/TPRKB/PUS7/MTO1/NSUN3/NOP10/ALKBH8/NSUN4/ELP3/TRMT10A/EMG1/TSR3/PUS7L/HSD17B10/METTL2B/DKC1/TRDMT1/TRMT1/THG1L/WDR4/FBL/APOBEC3B
GO:0006654	GO:0006654	phosphatidic acid biosynthetic process	32	0.559177620684928	1.70785127988648	0.00796411413478305	0.063825826682209	0.0514256173397915	2003	tags=34%, list=14%, signal=30%	PLA2G4A/ABHD4/PLD6/PLD2/ACP6/SLC27A1/GPAT4/LPCAT4/DGKE/GPAM/DGKA
GO:0046473	GO:0046473	phosphatidic acid metabolic process	32	0.559177620684928	1.70785127988648	0.00796411413478305	0.063825826682209	0.0514256173397915	2003	tags=34%, list=14%, signal=30%	PLA2G4A/ABHD4/PLD6/PLD2/ACP6/SLC27A1/GPAT4/LPCAT4/DGKE/GPAM/DGKA
GO:0036294	GO:0036294	cellular response to decreased oxygen levels	173	-0.377379308145693	-1.46381955674087	0.00797989350533501	0.063825826682209	0.0514256173397915	2048	tags=30%, list=15%, signal=26%	HIGD1A/PSMD10/UBB/PSMD3/SLC8A1/TSC1/SUV39H1/MDM4/PSMC5/CREBBP/PSMC6/PSME3/PMAIP1/PSMB4/PSMA1/PSME2/TWIST1/PSMB6/PSMA2/EIF4EBP1/ANKRD1/TP53/PRKAA1/PGK1/CITED2/PTN/PSMD14/PSMD11/PSMA6/PSMA3/PSMB5/PSMB3/PSMC2/PSMB7/HIF3A/ENO1/PSMC1/UBA52/RBX1/PSMB1/PSMB9/PSMA5/PSMB2/EEF2K/RPS27A/PSMA4/SCN2A/LMNA/SUV39H2/BRIP1/CCNA2/CCNB1
GO:0006112	GO:0006112	energy reserve metabolic process	63	0.452547053818664	1.57753770867151	0.00798718257583199	0.063825826682209	0.0514256173397915	2368	tags=33%, list=17%, signal=28%	LEPR/PPP1R3G/PGM2L1/INSR/RB1CC1/NHLRC1/PHKA1/PHKA2/PHKG2/PPP1R3C/PYGB/AKT2/RUBCNL/IL6ST/GAA/AGL/PPP1R2/PPP1R3F/DYRK2/GFPT1/PPP1R3B
GO:2001021	GO:2001021	negative regulation of response to DNA damage stimulus	74	-0.459687152662867	-1.56692924677998	0.00813932466464217	0.064881759961587	0.0522764017884132	2236	tags=31%, list=16%, signal=26%	KDM1A/OTUB1/TRIAP1/PSMD10/CHEK2/SHLD2/TWIST1/CGAS/TAF9/OGG1/AUNIP/TAF9B/PARPBP/RPS3/BCL2L12/FANCB/SHLD1/RMI2/DDX39B/CXCL12/FBXO5/DDIAS/POLQ
GO:0042775	GO:0042775	mitochondrial ATP synthesis coupled electron transport	95	-0.44302510899378	-1.58047264117901	0.00814359538612512	0.064881759961587	0.0522764017884132	2605	tags=37%, list=19%, signal=30%	SDHAF2/NDUFB1/COX7C/NDUFA4/COX2/COX10/NDUFA1/NDUFAF1/NDUFB2/COX15/NDUFA6/COX6B1/NDUFS5/NDUFS1/SDHD/COX6C/UQCRQ/NDUFB7/UQCRH/CYC1/UQCR10/UQCRC2/NDUFA12/NDUFS4/UQCRHL/NDUFB9/DLD/COX7B/DNAJC15/NDUFB3/PARK7/NDUFA9/CYCS/CCNB1/CDK1
GO:1905952	GO:1905952	regulation of lipid localization	107	0.406707037517664	1.53270928376582	0.0081782332873401	0.0650290623787368	0.0523950859971629	2018	tags=24%, list=14%, signal=21%	AGT/CD36/PTGES/LIPG/FABP3/PLA2G4A/REN/APOB/PCSK9/PRKN/MSR1/PLA2R1/SPP1/OSBPL8/PLTP/P2RX4/C1QTNF1/TMEM30A/PLIN2/ACACB/LRP1/AKT2/IL6/ABCB4/LDLRAP1/ITGAV
GO:0072009	GO:0072009	nephron epithelium development	64	0.460867282536547	1.61794039182056	0.00822722281625941	0.0650290623787368	0.0523950859971629	2999	tags=38%, list=21%, signal=30%	AGT/KLHL3/WNT2B/LAMB2/BMP2/NOG/STAT1/SMO/AQP11/KIF26B/BMP4/GREM1/HOXA11/CTNNBIP1/YAP1/VEGFA/HEYL/PKD2/LIF/AHI1/HOXD11/GZF1/PBX1/FGF2
GO:0007616	GO:0007616	long-term memory	18	0.660146707092387	1.75690767169833	0.0082280276577502	0.0650290623787368	0.0523950859971629	2947	tags=50%, list=21%, signal=40%	NFATC4/PRNP/GRIA1/CTNS/SGK1/MECP2/LDLR/KAT2A/RASGRF1
GO:0000463	GO:0000463	maturation of LSU-rRNA from tricistronic rRNA transcript (SSU-rRNA, 5.8S rRNA, LSU-rRNA)	15	-0.700330435467194	-1.73011336739321	0.00823096916311562	0.0650290623787368	0.0523950859971629	2578	tags=67%, list=18%, signal=54%	DDX18/RPL7L1/ZNHIT3/NOL9/RPL35/WDR12/NIFK/GTPBP4/RPF2/RPL7
GO:0002902	GO:0002902	regulation of B cell apoptotic process	15	-0.700630151831094	-1.73085379399949	0.00823096916311562	0.0650290623787368	0.0523950859971629	149	tags=27%, list=1%, signal=26%	ADA/FOXP1/SLC39A10/AURKB
GO:0050890	GO:0050890	cognition	155	0.362214708761752	1.43314995655215	0.00824472293326966	0.0650290623787368	0.0523950859971629	1762	tags=20%, list=13%, signal=18%	FGF13/BRINP1/GPR155/LGMN/NFATC4/PRNP/GTF2A1L/DKK1/INSR/GRIA1/PRKN/VLDLR/FYN/ITGA3/CTNS/CEBPB/SGK1/NTF3/GM2A/CHMP2B/THRA/MME/SLC1A1/TANC1/MECP2/SNAP25/SLC7A11/CDK5/BTG2/HOXA1/AMFR
GO:0007064	GO:0007064	mitotic sister chromatid cohesion	24	-0.631796732533467	-1.73951330582562	0.00824723237799917	0.0650290623787368	0.0523950859971629	1902	tags=46%, list=14%, signal=40%	NSMCE2/SLF1/RAD21/SMC5/SMC1A/POGZ/BOD1/HASPIN/CDCA5/SGO1/CDC20
GO:1903557	GO:1903557	positive regulation of tumor necrosis factor superfamily cytokine production	48	0.485193547230277	1.61953671256157	0.00829659455489812	0.0653219359211861	0.0526310594816574	1030	tags=19%, list=7%, signal=17%	CD36/CD14/NFATC4/HLA-E/IFIH1/PIK3R1/DDX58/LY96/TLR4
GO:0006878	GO:0006878	cellular copper ion homeostasis	13	0.727670730417072	1.7737543076653	0.00838181813117318	0.0658958819547821	0.0530934981312084	393	tags=23%, list=3%, signal=22%	MT2A/PRNP/SLC31A2
GO:0008156	GO:0008156	negative regulation of DNA replication	29	-0.609689156227789	-1.75892763836061	0.00848099481831862	0.0665776773843339	0.05364283298023	2216	tags=45%, list=16%, signal=38%	SLFN11/DONSON/CHEK2/TP53/GTPBP4/BLM/TIMELESS/LIG3/ZRANB3/GMNN/FBXO5/BRCA2/CDC6
GO:1902532	GO:1902532	negative regulation of intracellular signal transduction	397	0.296588173121677	1.30998053745595	0.00851086758868842	0.0667142201306866	0.0537528479285584	2557	tags=25%, list=18%, signal=21%	AGT/RGS4/MYOZ2/DUSP4/RGS2/PIK3IP1/FBLN1/SOD2/XDH/BCL2L1/LMO3/SPRY1/LRRK2/PRNP/SPRED3/SCAI/SMPD1/MUC1/PTPN22/PRKN/TSC2/VGLL4/CCN3/ITGA3/STAT1/MDM2/FHL2/CGNL1/PINK1/ARHGAP25/SEMA6A/GPER1/SFRP1/TLR4/C3orf33/SERPINE2/TSPAN6/GPX1/BMP4/RGS3/PDCD4/ARHGAP12/HYAL2/SIRT3/PLEKHA1/P2RX7/CYLD/RASA2/GPS1/WTIP/ERRFI1/PTPRR/MAPK7/TMEM127/RNF157/CCAR2/KANK1/PEBP1/DUSP5/CASTOR3/MARCHF7/HEG1/TXNDC12/DHX58/NFE2L2/PR…
GO:1904019	GO:1904019	epithelial cell apoptotic process	78	0.428116010781446	1.54512843447479	0.00860122113682743	0.0672765742408878	0.0542059467567907	1953	tags=32%, list=14%, signal=28%	ANGPTL4/SFRP4/NUPR1/CCL2/ANGPT1/GSN/SCG2/SEMA5A/TGFBR2/PLA2R1/WFS1/ITGA4/TNIP2/GPER1/GAS6/CAST/PDCD4/SORT1/MAPK7/ICAM1/NFE2L2/IL6/YAP1/CD40/PLCG1
GO:0030856	GO:0030856	regulation of epithelial cell differentiation	89	0.422164088523688	1.55528933748619	0.0086077771756018	0.0672765742408878	0.0542059467567907	1927	tags=28%, list=14%, signal=24%	CTSK/SFRP4/ATOH8/XDH/SPRY1/SPRED3/CCND1/RUNX1/CTSL/STAT1/SMO/IKBKB/MAFF/CEBPB/GRHL1/VDR/BMP4/ADD1/NCOA3/ERRFI1/KIAA1109/CD109/S1PR2/YAP1/VEGFA
GO:0005977	GO:0005977	glycogen metabolic process	57	0.472364667620783	1.61333180048734	0.00863148930954855	0.0673634187574402	0.0542759189468654	2368	tags=35%, list=17%, signal=29%	LEPR/PPP1R3G/PGM2L1/INSR/RB1CC1/NHLRC1/PHKA1/PHKA2/PHKG2/PPP1R3C/PYGB/AKT2/RUBCNL/IL6ST/GAA/AGL/PPP1R2/PPP1R3F/DYRK2/PPP1R3B
GO:0009199	GO:0009199	ribonucleoside triphosphate metabolic process	75	-0.454692161118228	-1.55104929629743	0.00871213092436388	0.0678936616933663	0.0547031452240248	2161	tags=39%, list=15%, signal=33%	COX2/ATP5PD/ATP5MGL/UCK2/ATP5PF/ATP5MF/VPS9D1/ATP5F1D/PID1/PKM/ATP5MC3/ATP5F1E/NME2/SLC25A12/CTPS1/ATP5MC2/ENO1/ATP5F1C/NME7/ATP5PB/ATP5ME/ATP5F1A/ATP5MG/IMPDH2/RAN/PARP1/ATP5MC1/NME1/ATP5PO
GO:0043409	GO:0043409	negative regulation of MAPK cascade	135	0.376305917050987	1.46719207021621	0.00873233788602136	0.0679520790955898	0.0547502131764336	2557	tags=30%, list=18%, signal=24%	AGT/RGS4/DUSP4/RGS2/FBLN1/LMO3/SPRY1/SPRED3/SMPD1/PTPN22/PRKN/PINK1/SEMA6A/GPER1/SFRP1/TLR4/C3orf33/BMP4/RGS3/PDCD4/HYAL2/SIRT3/P2RX7/CYLD/GPS1/ERRFI1/PTPRR/PEBP1/DUSP5/UCHL1/DAG1/ABCA7/TAOK3/PPP2R1A/HIPK3/LAX1/LIF/DAB2IP/CAMK2N1/IGF1R
GO:0071456	GO:0071456	cellular response to hypoxia	165	-0.378966730150778	-1.46843456765345	0.00879816749106901	0.0683648305338007	0.0550827744391897	2048	tags=30%, list=15%, signal=26%	HIGD1A/PSMD10/UBB/PSMD3/SLC8A1/SUV39H1/MDM4/PSMC5/CREBBP/PSMC6/PSME3/PMAIP1/PSMB4/PSMA1/PSME2/TWIST1/PSMB6/PSMA2/EIF4EBP1/ANKRD1/TP53/PRKAA1/PGK1/CITED2/PTN/PSMD14/PSMD11/PSMA6/PSMA3/PSMB5/PSMB3/PSMC2/PSMB7/HIF3A/ENO1/PSMC1/UBA52/RBX1/PSMB1/PSMB9/PSMA5/PSMB2/RPS27A/PSMA4/SCN2A/LMNA/SUV39H2/BRIP1/CCNA2/CCNB1
GO:0001508	GO:0001508	action potential	82	0.422283339890874	1.53072268287178	0.00881913038149526	0.0684282598250706	0.0551338805608106	1814	tags=23%, list=13%, signal=20%	CD36/FGF13/KCNJ2/ATP2A2/USP53/CACNA1C/KCNMB3/SLC9A1/NOS1AP/GNA14/GPER1/P2RX4/KCND2/KCNMB2/DSP/AKAP6/FMR1/SLMAP/KCNJ3
GO:0071168	GO:0071168	protein localization to chromatin	27	-0.618630527703028	-1.75620808480115	0.00907589353573339	0.0703184446985952	0.0566568365342808	158	tags=37%, list=1%, signal=37%	RAD21/PPHLN1/LEMD2/MSH2/MCM8/RUVBL2/EZH2/CDCA5/PLK1/ESCO2
GO:0090175	GO:0090175	regulation of establishment of planar polarity	94	-0.430395612240154	-1.53315834585603	0.00910226902449874	0.0703481860152785	0.0566807996484375	2486	tags=37%, list=18%, signal=31%	SMURF2/RAC1/FZD2/DVL1/PSMA7/PSMD10/PSMD3/DAAM1/AP2B1/PSMC5/PSMC6/RHOA/PSME3/PSMB4/PSMA1/PSME2/PSMB6/PSMA2/PSMD14/PSMD11/PSMA6/PSMA3/PSMB5/PSMB3/PSMC2/PSMB7/PSMC1/AP2S1/PFN1/PSMB1/PSMB9/PSMA5/PSMB2/PSMA4/CDC42
GO:0009435	GO:0009435	NAD biosynthetic process	20	0.632558137341238	1.75334922810838	0.00911621102940727	0.0703481860152785	0.0566807996484375	2684	tags=45%, list=19%, signal=36%	NNMT/QPRT/NAXD/NMRK1/NADSYN1/NMNAT3/NAMPT/PARP9/PTGS2
GO:1904816	GO:1904816	positive regulation of protein localization to chromosome, telomeric region	12	-0.747451593977562	-1.76686128376151	0.00911920929827684	0.0703481860152785	0.0566807996484375	3274	tags=92%, list=23%, signal=70%	CCT7/CCT4/TCP1/CCT6A/CCT8/GNL3L/GNL3/CCT3/DKC1/CCT5/CCT2
GO:0009791	GO:0009791	post-embryonic development	58	0.467577438953353	1.60806569079182	0.00918679049701173	0.0707674092176149	0.0570185753280328	2369	tags=28%, list=17%, signal=23%	EFEMP1/APOB/SCUBE1/SEMA3C/CRB1/TIPARP/BMP4/ACO1/PLEKHA1/MECP2/TGFBR1/HEG1/VEGFA/IGF2R/ALDH5A1/BCL2L11
GO:0006047	GO:0006047	UDP-N-acetylglucosamine metabolic process	14	-0.717816274920183	-1.75824362579622	0.00921525466488093	0.0707930398235949	0.0570392263685885	503	tags=36%, list=4%, signal=34%	GNPDA2/PGM3/UAP1/GNPNAT1/B4GALNT2
GO:0006418	GO:0006418	tRNA aminoacylation for protein translation	44	-0.545566403027366	-1.68458964433087	0.00921660226659597	0.0707930398235949	0.0570392263685885	2927	tags=52%, list=21%, signal=41%	AARSD1/DARS1/MARS1/FARS2/GARS1/PPA2/EPRS1/YARS2/LARS1/IARS1/AIMP1/QARS1/KARS1/TARS1/RARS1/WARS2/AIMP2/EARS2/VARS1/WARS1/EEF1E1/DARS2/FARSB
GO:0009411	GO:0009411	response to UV	128	-0.391460585847661	-1.44948057993004	0.0093045392034424	0.0712641923897551	0.0574188424712777	1401	tags=19%, list=10%, signal=17%	TP53/PRKAA1/RUVBL2/PTN/RPL26/INO80/TP53I13/MAPK8/GTF2H2/SCARA3/PCNA/POLD3/PARP1/NPM1/EIF2S1/ZRANB3/CHEK1/FEN1/MMP1/BRCA2/AURKB/DTL/PCLAF/PBK
GO:2000146	GO:2000146	negative regulation of cell motility	197	0.33817940174897	1.38533152311241	0.00930460274748392	0.0712641923897551	0.0574188424712777	2999	tags=32%, list=21%, signal=25%	DPP4/STC1/ACVR1C/FBLN1/CCL2/PADI2/APOD/SCAI/NISCH/NOG/CCN3/VASH1/OSBPL8/TGFB1/CYP1B1/ANGPT2/TP53INP1/BMERB1/SP100/DNAJA4/SFRP1/IGFBP3/TIMP1/HYAL2/SRGAP3/GADD45A/GREM1/MECP2/WASL/MIA3/DLL4/RECK/PTPRR/DNAI3/KANK1/SRGAP1/SMAD7/LRP1/NFE2L2/PTPRM/IL27RA/MCTP1/LIMCH1/ABHD6/PTPRU/DAG1/RIPOR2/MIF/FOXO3/DAB2IP/IFITM1/HOXA7/TCAF1/CERS2/THBS1/RAP2A/IL24/STK24/PTPRK/HMOX1/THY1/SERPINF1/FGF2
GO:0090257	GO:0090257	regulation of muscle system process	151	0.354074863515369	1.39762216776155	0.00934827555481478	0.0714962533848925	0.0576058181918562	1755	tags=19%, list=13%, signal=17%	AGT/FGF13/PDE4B/STC1/KCNJ2/RGS4/RGS2/MYL3/ATP2A2/TMEM38B/TNNT2/LMCD1/TNNI3K/FBXO32/CCN2/CACNA1C/SLC9A1/GPER1/P2RX4/CHRM3/MEF2A/ERRFI1/DSP/AKAP6/EHD3/F2R/SMAD7/UTRN/IL6ST
GO:1904036	GO:1904036	negative regulation of epithelial cell apoptotic process	34	0.538722528523041	1.66098043264979	0.00940334067373949	0.0718146560597304	0.0578623609578075	1829	tags=38%, list=13%, signal=33%	ANGPTL4/NUPR1/ANGPT1/SCG2/SEMA5A/WFS1/TNIP2/GAS6/CAST/MAPK7/ICAM1/NFE2L2/YAP1
GO:0030336	GO:0030336	negative regulation of cell migration	190	0.336624801321475	1.38072447164476	0.00945641019927231	0.0718752988299791	0.0579112219292879	2999	tags=33%, list=21%, signal=26%	DPP4/STC1/ACVR1C/CCL2/PADI2/APOD/SCAI/NISCH/NOG/CCN3/VASH1/OSBPL8/TGFB1/CYP1B1/ANGPT2/TP53INP1/BMERB1/SP100/DNAJA4/SFRP1/IGFBP3/TIMP1/HYAL2/SRGAP3/GADD45A/GREM1/MECP2/WASL/MIA3/DLL4/RECK/PTPRR/DNAI3/KANK1/SRGAP1/SMAD7/LRP1/NFE2L2/PTPRM/IL27RA/MCTP1/LIMCH1/ABHD6/PTPRU/DAG1/RIPOR2/MIF/FOXO3/DAB2IP/IFITM1/HOXA7/TCAF1/CERS2/THBS1/RAP2A/IL24/STK24/PTPRK/HMOX1/THY1/SERPINF1/FGF2
GO:0031571	GO:0031571	mitotic G1 DNA damage checkpoint	56	-0.484804047583639	-1.57632293393214	0.00946224576558061	0.0718752988299791	0.0579112219292879	2166	tags=36%, list=15%, signal=30%	TRIAP1/CNOT6/CHEK2/MDM4/CNOT9/CNOT2/PCBP4/TP53/PRMT1/RPL26/TFDP1/PCNA/CDK2/CASP2/E2F7/AURKA/CCNB1/GTSE1/CDC25C/CDK1
GO:0044819	GO:0044819	mitotic G1/S transition checkpoint	56	-0.484804047583639	-1.57632293393214	0.00946224576558061	0.0718752988299791	0.0579112219292879	2166	tags=36%, list=15%, signal=30%	TRIAP1/CNOT6/CHEK2/MDM4/CNOT9/CNOT2/PCBP4/TP53/PRMT1/RPL26/TFDP1/PCNA/CDK2/CASP2/E2F7/AURKA/CCNB1/GTSE1/CDC25C/CDK1
GO:0055081	GO:0055081	anion homeostasis	19	0.648816136107898	1.76233753698618	0.00947510776702711	0.0718752988299791	0.0579112219292879	2338	tags=58%, list=17%, signal=48%	SFRP4/CA12/SLC12A7/KCTD7/GLS/CKB/SLC1A1/SLC7A11/SLC12A6/SLC12A8/SLC12A4
GO:0043542	GO:0043542	endothelial cell migration	175	0.345967495281908	1.40460601486012	0.00947850461562575	0.0718752988299791	0.0579112219292879	2532	tags=29%, list=18%, signal=24%	AGT/DPP4/STC1/HDAC9/JCAD/LGMN/ATOH8/ANGPT1/SCG2/SEMA5A/GRN/CCN3/VASH1/TGFB1/CYP1B1/FAP/ANGPT2/SP100/DNAJA4/RIN2/P2RX4/GPLD1/EMC10/PRCP/GPX1/BMP4/GADD45A/GREM1/EGR3/MECP2/PIK3R3/MIA3/DLL4/TGFBR1/NFE2L2/PTPRM/PLPP3/FBXW7/CD40/VEGFA/PLCG1/MAP3K3/STAT5A/PIK3CA/MAP2K3/TEK/PRKX/DAB2IP/BCAS3/PDCD6/ITGB3
GO:0002237	GO:0002237	response to molecule of bacterial origin	196	0.334381640756572	1.37039361585076	0.00957299371719014	0.072333545903158	0.0582804398439999	1030	tags=12%, list=7%, signal=12%	FMO1/CD36/PDE4B/CD14/PTGES/SOD2/CCL2/REN/WDR83/APOB/ATP2A2/PTGIR/PTPN22/CD55/TGFB1/CD68/TNIP2/CEBPB/PLCG2/ADM/IRAK1/PLSCR4/LY96/TLR4
GO:1902807	GO:1902807	negative regulation of cell cycle G1/S phase transition	89	-0.451638532198463	-1.59069284495789	0.00957619982570911	0.072333545903158	0.0582804398439999	2216	tags=33%, list=16%, signal=28%	SLFN11/TRIAP1/CNOT6/CHEK2/MDM4/CNOT9/CDKN2B/CTDSPL/CNOT2/SUSD2/CDK6/PCBP4/TP53/PRMT1/RPL26/TFDP1/PCNA/CDK2/CASP2/FHL1/CDKN2C/RBL1/EZH2/E2F7/AURKA/CCNB1/GTSE1/CDC25C/CDK1
GO:0048705	GO:0048705	skeletal system morphogenesis	135	0.372870702303823	1.45379839340127	0.00958011222479694	0.072333545903158	0.0582804398439999	1832	tags=21%, list=13%, signal=18%	STC1/MGP/SFRP4/MMP2/RDH10/CYP26B1/DHRS3/NOG/CSGALNACT1/CCN2/TGFBR2/TIPARP/BMPR1B/WDR19/TSKU/SFRP1/DYNC2I1/THRA/BMP4/HYAL2/GREM1/PLEKHA1/SPEF2/TGFBR1/TMEM107/HOXA11/HOXA1/PDGFRA
GO:0030490	GO:0030490	maturation of SSU-rRNA	47	-0.512536561874421	-1.59355186642369	0.00959305724753816	0.072333545903158	0.0582804398439999	3735	tags=55%, list=27%, signal=41%	NOL10/ERCC2/BYSL/UTP6/DDX52/RPP40/NOP14/UTP4/RPS28/NGDN/NAT10/LSM6/HEATR1/RRP36/UTP20/GTF2H5/NOL11/RIOK2/WDR3/DCAF13/TSR3/SNU13/RPS8/BMS1/RPS21/RPS16
GO:0006516	GO:0006516	glycoprotein catabolic process	22	0.604865497184328	1.69802617053546	0.00961731736919113	0.0724143361347828	0.0583455339877392	1207	tags=36%, list=9%, signal=33%	FBXO6/MANBA/CST3/CTSL/MMP12/EDEM2/SGSH/MAN1B1
GO:0002221	GO:0002221	pattern recognition receptor signaling pathway	148	0.361467085798446	1.42641366244929	0.00971286204777334	0.0729774954081418	0.0587992815504197	1908	tags=21%, list=14%, signal=18%	CTSK/CD36/CD14/LGMN/APOB/IFIH1/PTPN22/CTSS/DDX58/CTSL/SLC15A3/IRF1/IKBKB/CNPY3/TNIP2/IRAK1/LY96/TLR4/TSPAN6/DDX60/CTSB/EPG5/CYLD/UBE2D1/TAB3/RAB11FIP2/TIFA/DHX58/ZDHHC5/BIRC3/CD40
GO:0042476	GO:0042476	odontogenesis	62	0.444783770432944	1.54707164408962	0.00971941203340759	0.0729774954081418	0.0587992815504197	1147	tags=21%, list=8%, signal=19%	FAM20A/CSF1/FST/BSG/ASPN/HTRA1/BMP2/PERP/PAM/SMO/ADM/SDC1/BMP4
GO:0090151	GO:0090151	establishment of protein localization to mitochondrial membrane	47	-0.509963275415694	-1.58555113877969	0.00973731104946376	0.0730093476443665	0.0588249454704447	2833	tags=40%, list=20%, signal=32%	TIMM9/ROMO1/YWHAG/HSP90AA1/PDCD5/HSPA4/MAIP1/BCS1L/PMAIP1/YWHAZ/YWHAE/CALM3/TP53/YWHAH/TIMM8B/AGK/MAPK8/TFDP1/TIMM10
GO:0046849	GO:0046849	bone remodeling	62	0.442806249122211	1.54019331949958	0.00987744779959726	0.0739563528524467	0.0595879646114581	1977	tags=27%, list=14%, signal=24%	PDK4/LEPR/SIGLEC15/SYT7/SPP1/TGFB1/ATP6AP1/TPP1/SFRP1/GPR137B/GREM1/P2RX7/LRRK1/RASSF2/IL6/TF/CTHRC1
GO:0072337	GO:0072337	modified amino acid transport	23	0.600138271069486	1.68903818631012	0.0099195691121755	0.0741678552079584	0.0597583758660613	1634	tags=35%, list=12%, signal=31%	LRP2/FOLR3/CTNS/SLC6A8/SLC16A12/SLC38A2/SLC7A11/SLC22A4
GO:0006354	GO:0006354	DNA-templated transcription, elongation	109	-0.417889758745187	-1.52096573846441	0.0100355943833252	0.0749050769849126	0.0603523687207873	3919	tags=46%, list=28%, signal=33%	ELOA/RNF168/UBTF/ELOB/RECQL5/POLR2F/MNAT1/ERCC2/GTF2H1/SUPT6H/LDB1/POLR2A/POLR2K/CDC73/POLR2I/POLR2D/CDK12/POLR1C/ELOC/KAT7/POLR2C/LARP7/CCNH/ELP4/TEFM/CDK7/ALYREF/BRD4/POLR1H/SUPT16H/HNRNPU/GTF2H5/POLR1E/RN7SK/NCBP1/POLR1G/POLR2G/LEO1/SSRP1/TAF1D/WDR61/ENY2/GTF2H2/TAF1A/POLR2H/SUPT4H1/SETD5/GTF2H3/DDX39B/EZH2
GO:0070507	GO:0070507	regulation of microtubule cytoskeleton organization	110	-0.414887280346488	-1.50636660103112	0.0100461915821516	0.0749050769849126	0.0603523687207873	605	tags=11%, list=4%, signal=11%	KIF18A/RPS3/MAPRE1/SKA2/STMN1/BORA/PSRC1/TPX2/PLK1/SKA3/SPAG5/SKA1
GO:0072577	GO:0072577	endothelial cell apoptotic process	39	0.53287693338026	1.68030892858333	0.0101649737309538	0.075685166526015	0.0609809009046515	2752	tags=49%, list=20%, signal=39%	ANGPTL4/CCL2/ANGPT1/SCG2/SEMA5A/ITGA4/TNIP2/GPER1/GAS6/PDCD4/MAPK7/ICAM1/NFE2L2/CD40/PLCG1/TEK/DAB2IP/THBS1/PDPK1
GO:0033627	GO:0033627	cell adhesion mediated by integrin	49	0.48623257173847	1.6232739868276	0.0102213471677762	0.0759990569665254	0.0612338080821907	2018	tags=27%, list=14%, signal=23%	DPP4/ITGB8/ITGA11/MUC1/ITGB5/CCN3/ITGA4/CYP1B1/ICAM1/PLPP3/JAM3/ITGA2/ITGAV
GO:0002903	GO:0002903	negative regulation of B cell apoptotic process	11	-0.760967784754542	-1.75556642727482	0.0102800150876743	0.0763291120259814	0.0614997393841566	149	tags=36%, list=1%, signal=36%	ADA/FOXP1/SLC39A10/AURKB
GO:0006997	GO:0006997	nucleus organization	107	-0.414699160483692	-1.50886963538647	0.0103420145891722	0.0766438670373874	0.0617533431620276	2908	tags=30%, list=21%, signal=24%	CTDNEP1/TOR1AIP1/H3-3A/AHCTF1/SRPK1/PARP11/TMEM43/PPP2CA/LEMD2/ETS1/NUP93/H3-3B/SERBP1/PITPNB/TARDBP/CHMP4A/PRKCA/SEH1L/NDC1/ZMPSTE24/EMG1/NUP155/BANF1/NUP35/NOLC1/LMNA/VRK1/HMGB2/CCNB1/PLK1/CCNB2/CDK1
GO:0002200	GO:0002200	somatic diversification of immune receptors	60	-0.485378215826384	-1.60351664065902	0.0103654163613975	0.0766438670373874	0.0617533431620276	2244	tags=27%, list=16%, signal=22%	NBN/MSH2/SHLD2/CTNNBL1/XRCC4/PMS2P1/MLH1/HMGB1/TNFSF4/DCLRE1C/HSPD1/PTPRC/SHLD1/HMGB2/POLQ/EXO1
GO:0009144	GO:0009144	purine nucleoside triphosphate metabolic process	74	-0.453597742689309	-1.5461723591273	0.0103654163613975	0.0766438670373874	0.0617533431620276	2774	tags=47%, list=20%, signal=38%	NUDT2/ITPA/NME6/NUDT1/ATPSCKMT/STOML2/ADK/COX2/ATP5PD/ATP5MGL/ATP5PF/ATP5MF/VPS9D1/ATP5F1D/PID1/PKM/ATP5MC3/ATP5F1E/NME2/NUDT15/SLC25A12/ATP5MC2/ENO1/ATP5F1C/NME7/ATP5PB/ATP5ME/ATP5F1A/ATP5MG/IMPDH2/RAN/PARP1/ATP5MC1/NME1/ATP5PO
GO:0018904	GO:0018904	ether metabolic process	18	0.653202222065192	1.73842569051265	0.0103811002097589	0.0766538145322804	0.0617613580377048	1080	tags=28%, list=8%, signal=26%	FASN/PLA2G4A/PLA2G4C/EPHX1/LPCAT2
GO:0001889	GO:0001889	liver development	104	-0.411846762749793	-1.49554549465381	0.0103972210727443	0.0766669570412293	0.061771947193713	1715	tags=23%, list=12%, signal=20%	TAF10/KRT18/PKM/ZMPSTE24/CPS1/PRMT5/CITED2/PTN/RPGRIP1L/MPST/HES1/RPL30/ANXA1/PCNA/HNRNPD/FGF1/GNPNAT1/DDX39B/ASNS/EZH2/TYMS/E2F7/AURKA/HGF
GO:0070498	GO:0070498	interleukin-1-mediated signaling pathway	93	-0.419748474098016	-1.49217040542835	0.0104696970961399	0.0770950422533938	0.0621168631541314	2183	tags=38%, list=16%, signal=32%	NFKB1/UBE2V1/PSMA7/NOD1/PSMD10/UBB/PSMD3/PSMC5/PSMC6/RPS6KA4/PSME3/PSMB4/PSMA1/PSME2/PSMB6/PSMA2/BTRC/PSMD14/PSMD11/PSMA6/PSMA3/PSMB5/PSMB3/PSMC2/PSMB7/PSMC1/UBE2N/UBA52/RBX1/PSMB1/PSMB9/PSMA5/PSMB2/RPS27A/PSMA4
GO:0098656	GO:0098656	anion transmembrane transport	352	0.300371325719401	1.31004629644782	0.0105001728257475	0.0771335356705623	0.0621478779931756	2738	tags=26%, list=20%, signal=21%	CD36/SLC1A2/LRP2/SLC14A1/RGS4/SLC4A11/RGS2/PRNP/BEST1/ABCC3/GLRB/ANO1/INSR/PIK3R1/SLC12A7/PACC1/GABRE/PCYOX1/CLTCL1/SLC15A3/ANKH/SLC3A2/SLC38A10/OSBPL8/SLC9A1/SLC17A5/SLC6A8/SLC9A7/TMEM144/SLC5A3/SLC2A1/SLC38A6/SLC25A4/SLC25A30/SLC47A1/SLC16A12/MEF2A/PEX6/TIMM17B/SLC29A3/SORT1/OAZ1/SLC1A1/SLC27A1/SLC38A2/SLC6A6/SLC7A11/ZFAND2B/SLC25A19/CREBL2/ACACB/TOMM20/SLC22A4/CLCN6/SLC7A7/NFE2L2/AKT2/PRKAA2/S…
GO:0061326	GO:0061326	renal tubule development	55	0.478505556908061	1.61976708094188	0.0105077211185976	0.0771335356705623	0.0621478779931756	2999	tags=42%, list=21%, signal=33%	AGT/KLHL3/WNT2B/BMP2/NOG/STAT1/SMO/AQP11/KIF26B/BMP4/GREM1/HOXA11/CTNNBIP1/YAP1/VEGFA/HEYL/PKD2/LIF/AHI1/HOXD11/GZF1/PBX1/FGF2
GO:0001655	GO:0001655	urogenital system development	237	0.320697331797609	1.34716251338089	0.0105182094096221	0.0771335356705623	0.0621478779931756	1927	tags=20%, list=14%, signal=17%	AGT/LRP2/SULF2/KLHL3/AKR1B1/RDH10/CTSH/CYP26B1/REN/ANGPT1/SPRY1/LRRK2/WNT2B/PSAP/LAMB2/BMP2/PCSK9/NOG/TIPARP/ITGA3/WFS1/STAT1/SMO/PTK7/AQP11/ANGPT2/KIF26B/ZNF354A/SFRP1/SDC1/IFT27/BMP4/MME/HYAL2/GREM1/SOX4/EMX2/GCNT4/TGFBR1/FEM1B/SMAD7/HOXA11/CTNNBIP1/YAP1/PDGFRA/NPHP3/VEGFA
GO:0045730	GO:0045730	respiratory burst	19	0.645183396751465	1.75247016073944	0.0105362983396101	0.0771603437308983	0.0621694777298986	650	tags=26%, list=5%, signal=25%	JCHAIN/INSR/CD55/GRN/CAMK1D
GO:0032469	GO:0032469	endoplasmic reticulum calcium ion homeostasis	23	0.597858679522636	1.68262246953712	0.0105544084002765	0.0771872329793137	0.0621911428813184	983	tags=22%, list=7%, signal=20%	ATP2A2/PACS2/TGM2/WFS1/PML
GO:0048609	GO:0048609	multicellular organismal reproductive process	479	-0.298243334318451	-1.27743487159116	0.0106255980075056	0.0776017034810453	0.0625250892244939	2237	tags=18%, list=16%, signal=15%	SPATA9/ROBO2/HSPA5/ETS1/SPOCD1/HERC4/SEPTIN7/HOXA9/RAD23B/SPIN4/HSF2BP/PAX5/SEPTIN6/UBB/IHO1/MSH2/SPA17/DAZAP1/PAFAH1B3/TMED2/MCM8/H3-3B/TSPAN8/IQCG/FANCC/NPM2/FANCL/SPATA24/NDC1/PDE3A/RAD51C/TSNAX/WT1/TESMIN/PAFAH1B1/NPHP1/MLH1/SEPTIN2/KHDRBS1/RPL39L/PTN/DYNLL1/CDC25B/GGT1/WDR77/OXTR/DLD/POMZP3/PRDX3/PCNA/CASP2/MNS1/SLIT2/RPS6/KIF18A/TTC12/HSPB11/AGO4/FANCA/WDR33/PGM3/ACTR1A/RPL10L/TTC26/ADAMTS2…
GO:1904872	GO:1904872	regulation of telomerase RNA localization to Cajal body	18	-0.675122502840517	-1.74524020677223	0.0107055941184318	0.0780792717014139	0.0629098745352522	2198	tags=67%, list=16%, signal=56%	CCT7/CCT4/TCP1/CCT6A/NOP10/RUVBL2/CCT8/CCT3/DKC1/SHQ1/CCT5/CCT2
GO:0000729	GO:0000729	DNA double-strand break processing	21	-0.654870014331702	-1.74042315700961	0.0107250626997368	0.0781146937231513	0.0629384146957165	1228	tags=33%, list=9%, signal=30%	BLM/UBE2N/UBE2V2/DNA2/BRCA1/BRIP1/BARD1
GO:0006885	GO:0006885	regulation of pH	72	0.425618894279541	1.52049132262028	0.0107798889714301	0.0784071924370956	0.0631740861741381	3317	tags=39%, list=24%, signal=30%	PDK4/LRRK2/ATP6AP2/GRN/HVCN1/ATP6AP1L/SLC9A1/AQP11/ATP6AP1/ATP6V1A/SLC9A7/ATP6V0A1/SLC26A6/CLN3/ATP6V1F/TMEM175/CLCN3/CLN5/ATP6V0B/SLC4A3/SLC9A5/DMXL2/PDK2/ATP6V0D1/SLC4A8/ATP6V1E2/LACC1/CCDC115
GO:0072073	GO:0072073	kidney epithelium development	84	0.412078879879301	1.50097312489632	0.0108315482269796	0.0786628767357134	0.0633800956155196	2694	tags=31%, list=19%, signal=25%	AGT/KLHL3/SPRY1/WNT2B/LAMB2/BMP2/NOG/STAT1/SMO/AQP11/KIF26B/SFRP1/SDC1/BMP4/GREM1/SMAD7/HOXA11/CTNNBIP1/YAP1/VEGFA/HEYL/PKD2/LIF/AHI1/HOXD11/GZF1
GO:0032496	GO:0032496	response to lipopolysaccharide	188	0.345018508288448	1.41356198535944	0.0108444706610963	0.0786628767357134	0.0633800956155196	1030	tags=13%, list=7%, signal=12%	FMO1/CD36/PDE4B/CD14/PTGES/SOD2/CCL2/REN/WDR83/APOB/ATP2A2/PTGIR/PTPN22/CD55/TGFB1/CD68/TNIP2/CEBPB/PLCG2/ADM/IRAK1/PLSCR4/LY96/TLR4
GO:0070374	GO:0070374	positive regulation of ERK1 and ERK2 cascade	111	0.389590225481169	1.48075875279578	0.010931799549393	0.0791888894187735	0.0638039135018058	1832	tags=22%, list=13%, signal=19%	CHI3L1/CCL7/CD36/GPNMB/CCL2/ANGPT1/ALKAL1/BMP2/PTPN22/CCN2/TGFB1/ATP6AP1/GPER1/TLR4/GAS6/BMP4/GAREM1/F2R/ICAM1/LRP1/GCNT2/CCL26/FBXW7/PDGFRA
GO:0009268	GO:0009268	response to pH	21	0.616470392982831	1.70561234810201	0.0109785721851226	0.0793907343780072	0.0639665436184073	1020	tags=33%, list=7%, signal=31%	LGMN/TRPV1/CTSS/PAM/HVCN1/SLC9A1/GPLD1
GO:2000134	GO:2000134	negative regulation of G1/S transition of mitotic cell cycle	88	-0.447985080448011	-1.57510253988034	0.0109946946177844	0.0793907343780072	0.0639665436184073	2216	tags=32%, list=16%, signal=27%	SLFN11/TRIAP1/CNOT6/CHEK2/MDM4/CNOT9/CDKN2B/CTDSPL/CNOT2/CDK6/PCBP4/TP53/PRMT1/RPL26/TFDP1/PCNA/CDK2/CASP2/FHL1/CDKN2C/RBL1/EZH2/E2F7/AURKA/CCNB1/GTSE1/CDC25C/CDK1
GO:0072528	GO:0072528	pyrimidine-containing compound biosynthetic process	34	-0.552380545443596	-1.64147163449419	0.011004215146671	0.0793907343780072	0.0639665436184073	1739	tags=35%, list=12%, signal=31%	PUDP/UMPS/CPS1/NME2/CTPS1/NME7/TPK1/DCK/NME1/TYMS/PRPS1/TK1
GO:0015909	GO:0015909	long-chain fatty acid transport	40	0.503579784262802	1.60459983444956	0.0110247006396819	0.0794313337193255	0.0639992552384429	2033	tags=30%, list=15%, signal=26%	CD36/FABP3/PLA2G4A/FABP4/PLA2R1/SLC2A1/PLIN2/SLC27A1/ACACB/AKT2/PRKAA2/SLC27A3
GO:0042359	GO:0042359	vitamin D metabolic process	10	0.750601273472941	1.70533057705482	0.011128579910222	0.0800718549125796	0.0645153346923968	1019	tags=40%, list=7%, signal=37%	LRP2/CYP27A1/LGMN/VDR
GO:0009141	GO:0009141	nucleoside triphosphate metabolic process	93	-0.418131172945627	-1.4864210363057	0.0111451523377289	0.0800833123622292	0.0645245661657987	2161	tags=33%, list=15%, signal=28%	ATP5PD/ATP5MGL/UCK2/ATP5PF/ATP5MF/VPS9D1/DCTPP1/ATP5F1D/PID1/PKM/ATP5MC3/ATP5F1E/NME2/NUDT15/SLC25A12/CTPS1/ATP5MC2/ENO1/ATP5F1C/NME7/ATP5PB/ATP5ME/ATP5F1A/ATP5MG/IMPDH2/RAN/PARP1/ATP5MC1/NME1/ATP5PO/TYMS
GO:0042632	GO:0042632	cholesterol homeostasis	52	0.470463280263955	1.57203720077088	0.0111892484104234	0.0801846139438656	0.0646061866734199	996	tags=21%, list=7%, signal=20%	LIPG/HDAC9/FABP3/APOB/FABP4/PCSK9/NPC1/NPC2/LCAT/AKR1C1/TSKU
GO:0055092	GO:0055092	sterol homeostasis	52	0.470463280263955	1.57203720077088	0.0111892484104234	0.0801846139438656	0.0646061866734199	996	tags=21%, list=7%, signal=20%	LIPG/HDAC9/FABP3/APOB/FABP4/PCSK9/NPC1/NPC2/LCAT/AKR1C1/TSKU
GO:0046916	GO:0046916	cellular transition metal ion homeostasis	81	0.426394389593002	1.54013920772468	0.0112463532277143	0.0803970678637275	0.0647773646205471	1295	tags=17%, list=9%, signal=16%	SLC40A1/MT2A/FTH1/SLC30A1/ISCU/PRNP/CYBRD1/SLC31A2/ATP6AP1/ATP6V1A/FTL/MT1X/ACO1/SLC1A1
GO:0019882	GO:0019882	antigen processing and presentation	183	-0.371704986033513	-1.44724259387832	0.0112489724582993	0.0803970678637275	0.0647773646205471	2345	tags=30%, list=17%, signal=25%	RAB4A/CLTA/TAP2/PSMA7/ABCB9/SEC23A/KIF2A/NOD1/PSMD10/PSMD3/AP2B1/PSMC5/PSMC6/PSME3/PSMB4/PSMA1/PSME2/PYCARD/RAB32/PSMB6/SAR1B/PSMA2/RAB8B/AP1S1/PSMD14/PSMD11/DYNLL1/SEC24D/PSMA6/PSMA3/PSMB5/PSMB3/PSMC2/CAPZB/PSMB7/CAPZA1/PSMC1/AP2S1/CTSV/PSMB1/PSMB9/PSMA5/PSMB2/KIF18A/PSMA4/ACTR1A/AP1M2/CENPE/KIF23/RACGAP1/KIF15/KIF11/KIF2C/KIF4A
GO:0003209	GO:0003209	cardiac atrium morphogenesis	19	0.643123399373379	1.74687472236568	0.0112942927766755	0.0806132031830537	0.0649515087374832	1699	tags=42%, list=12%, signal=37%	WNT2/BMP2/NOG/SMO/SOS1/SOX4/DLL4/HEG1
GO:0010769	GO:0010769	regulation of cell morphogenesis involved in differentiation	80	-0.442620225127567	-1.53265029920272	0.0113721832186826	0.0808337650382574	0.0651292193940475	1559	tags=24%, list=11%, signal=21%	LIMS1/ACTR2/FLNA/EFNA5/CARMIL1/CORO1C/C1QBP/FERMT2/EEF2K/CDC42/ACTN4/EPHA4/GBP1/PREX1/FGG/FGB/S100A10/HAS2/POSTN
GO:1900118	GO:1900118	negative regulation of execution phase of apoptosis	16	0.656806660496963	1.70178182118748	0.0113763822968868	0.0808337650382574	0.0651292193940475	1668	tags=44%, list=12%, signal=39%	BCL2L1/MTRNR2L11/MTRNR2L2/FZD3/MTRNR2L6/MTRNR2L10/MTRNR2L1
GO:0022406	GO:0022406	membrane docking	164	-0.368665276941732	-1.42661177143152	0.0113880778917272	0.0808337650382574	0.0651292193940475	2900	tags=29%, list=21%, signal=23%	DCTN3/CEP192/SNX3/RAB3D/YWHAG/STX8/EXOC6/SCLT1/TMEM216/ODF2/HAUS1/STX2/HSP90AA1/NEDD1/RALB/ESYT1/RABEPK/CEP41/CKAP5/MKS1/RAB8B/YWHAE/RAB8A/PAFAH1B1/NPHP1/CEP135/SCFD1/RPGRIP1L/DYNLL1/EZR/MSN/CC2D2A/CEP89/CEP43/CNTRL/KIF24/HAUS8/MAPRE1/VCAM1/ACTR1A/B9D1/TUBB/TUBA1A/PLK1/PLK4/CDK1/NEK2
GO:0034308	GO:0034308	primary alcohol metabolic process	53	0.460247459705712	1.54731212328682	0.0113965579056344	0.0808337650382574	0.0651292193940475	2509	tags=34%, list=18%, signal=28%	AKR1B1/RDH10/AKR1B10/DHRS3/BMP2/CYP1B1/AKR1C1/CHKA/RETSAT/DKK3/TTR/AKR1C2/GDPD1/GDE1/GDPD3/ALDH3A2/ACSS2/AKR1A1
GO:0003128	GO:0003128	heart field specification	11	0.723103025042159	1.69871298798903	0.011400796640263	0.0808337650382574	0.0651292193940475	1147	tags=45%, list=8%, signal=42%	LRP2/DKK1/BMP2/SMARCD3/BMP4
GO:0051271	GO:0051271	negative regulation of cellular component movement	202	0.335401470250208	1.3809093228757	0.0115135435980886	0.0815250385104396	0.0656861908726089	2999	tags=32%, list=21%, signal=25%	DPP4/STC1/ACVR1C/FBLN1/CCL2/PADI2/APOD/SCAI/NISCH/NOG/CCN3/VASH1/OSBPL8/TGFB1/CYP1B1/ANGPT2/TP53INP1/BMERB1/SP100/DNAJA4/SFRP1/IGFBP3/TIMP1/HYAL2/SRGAP3/GADD45A/GREM1/MECP2/WASL/MIA3/DLL4/RECK/PTPRR/DNAI3/KANK1/TGFBR3/SRGAP1/SMAD7/LRP1/NFE2L2/PTPRM/IL27RA/MCTP1/LIMCH1/ABHD6/PTPRU/DAG1/RIPOR2/MIF/FOXO3/DAB2IP/IFITM1/HOXA7/TCAF1/CERS2/THBS1/RAP2A/IL24/STK24/PTPRK/HMOX1/THY1/SERPINF1/FGF2
GO:1902644	GO:1902644	tertiary alcohol metabolic process	13	0.71001228427256	1.73071046433584	0.0116114315178969	0.0821094085908423	0.0661570283642914	1660	tags=46%, list=12%, signal=41%	AKR1B1/AKR1B10/BMP2/AKR1C1/DKK3/AKR1C2
GO:0050873	GO:0050873	brown fat cell differentiation	31	0.5186414019295	1.55536877854615	0.0117317991224874	0.0828509882547132	0.0667545324469424	1658	tags=26%, list=12%, signal=23%	RGS2/FABP3/FABP4/FNDC5/CEBPB/DIO2/ZNF516/ERO1A
GO:0044380	GO:0044380	protein localization to cytoskeleton	50	-0.509231297870948	-1.62094540848708	0.0117567277639103	0.08291750214494	0.0668081238854617	525	tags=14%, list=4%, signal=14%	MAPRE1/STIL/MID1/KIF20B/AURKA/SPAG5/TTK
GO:0003148	GO:0003148	outflow tract septum morphogenesis	20	0.624513305734664	1.73105025121601	0.0118284174957132	0.0831815039287672	0.0670208348743803	1147	tags=25%, list=8%, signal=23%	LRP2/GATA6/SEMA3C/TGFBR2/BMP4
GO:0019377	GO:0019377	glycolipid catabolic process	12	0.710472553247301	1.70331761055161	0.0118353467972295	0.0831815039287672	0.0670208348743803	1011	tags=42%, list=7%, signal=39%	HEXA/NEU1/FUCA1/HEXB/GM2A
GO:0006073	GO:0006073	cellular glucan metabolic process	58	0.458002188394769	1.57513503455986	0.0118563984275572	0.0831815039287672	0.0670208348743803	2368	tags=34%, list=17%, signal=29%	LEPR/PPP1R3G/PGM2L1/INSR/RB1CC1/NHLRC1/PHKA1/PHKA2/PHKG2/PPP1R3C/PYGB/AKT2/RUBCNL/IL6ST/GAA/AGL/PPP1R2/PPP1R3F/DYRK2/PPP1R3B
GO:0044042	GO:0044042	glucan metabolic process	58	0.458002188394769	1.57513503455986	0.0118563984275572	0.0831815039287672	0.0670208348743803	2368	tags=34%, list=17%, signal=29%	LEPR/PPP1R3G/PGM2L1/INSR/RB1CC1/NHLRC1/PHKA1/PHKA2/PHKG2/PPP1R3C/PYGB/AKT2/RUBCNL/IL6ST/GAA/AGL/PPP1R2/PPP1R3F/DYRK2/PPP1R3B
GO:0060253	GO:0060253	negative regulation of glial cell proliferation	11	-0.756303245296566	-1.74480525047446	0.0119307931423684	0.0835338974219988	0.0673047646545019	2012	tags=45%, list=14%, signal=39%	IDH2/PTN/HES1/TSPO/ADCYAP1
GO:1904037	GO:1904037	positive regulation of epithelial cell apoptotic process	25	0.579658067933554	1.67621456790071	0.0119378783446328	0.0835338974219988	0.0673047646545019	1953	tags=44%, list=14%, signal=38%	SFRP4/CCL2/GSN/PLA2R1/ITGA4/GPER1/PDCD4/SORT1/IL6/CD40/PLCG1
GO:0051897	GO:0051897	positive regulation of protein kinase B signaling	106	0.387377964975892	1.46009903598788	0.0119811815170972	0.083727315543009	0.0674606051158747	1676	tags=25%, list=12%, signal=22%	CHI3L1/LRP2/EREG/GDF15/FGF5/ANGPT1/KITLG/INSR/PIK3R1/FYN/SEMA5A/OSBPL8/TGFB1/PINK1/F10/P2RX4/C1QTNF1/FGF7/GAS6/GPX1/TGFBR1/FGF9/MYDGF/HIP1/AKR1C2/GCNT2
GO:0001578	GO:0001578	microtubule bundle formation	63	-0.480611299115339	-1.59396111136406	0.0120125369597698	0.0837337953495843	0.0674658260126605	1878	tags=24%, list=13%, signal=21%	MAP1B/IQCG/ODAD4/HYDIN/DNAL1/ZNF207/CCDC65/TTC12/MAPRE1/TTC26/DNAH5/PSRC1/PLK1/PRC1/KIF20A
GO:0120254	GO:0120254	olefinic compound metabolic process	58	0.457814236365122	1.57448864064687	0.0120134345366875	0.0837337953495843	0.0674658260126605	1712	tags=31%, list=12%, signal=27%	PTGES/RDH10/PLA2G4A/PLA2G4C/BMP2/EPHX1/CYP1B1/GPX4/ADM/AKR1C1/CYP2U1/CBR1/GPX1/DKK3/FADS1/ACOT8/AKR1C2/ACAA1
GO:0042744	GO:0042744	hydrogen peroxide catabolic process	13	-0.718321963067847	-1.74442637286748	0.0121425663198688	0.0845236452422114	0.0681022222874218	945	tags=31%, list=7%, signal=29%	PRDX6/PRDX3/HBD/HP
GO:0006835	GO:0006835	dicarboxylic acid transport	55	0.474332145178468	1.60563985747035	0.0122723447637712	0.0851913879976233	0.068640234643959	1458	tags=18%, list=10%, signal=16%	SLC1A2/LRP2/PPFIA4/FOLR3/SLC25A30/GLS/SLC1A1/SLC38A2/SNAP25/SLC7A11
GO:0051446	GO:0051446	positive regulation of meiotic cell cycle	13	-0.717015800488474	-1.74125439070926	0.0122862636623592	0.0851913879976233	0.068640234643959	1738	tags=38%, list=12%, signal=34%	NPM2/CDC25A/CDC25B/RAD51AP1/CDC25C
GO:0060394	GO:0060394	negative regulation of pathway-restricted SMAD protein phosphorylation	10	0.745287364576905	1.69325762748179	0.0123077507733919	0.0851913879976233	0.068640234643959	1651	tags=50%, list=12%, signal=44%	PMEPA1/DKK1/NOG/GREM1/SMAD7
GO:0001736	GO:0001736	establishment of planar polarity	102	-0.424913669521652	-1.54008389447304	0.0123181711414446	0.0851913879976233	0.068640234643959	2486	tags=38%, list=18%, signal=32%	SMURF2/RAC1/FZD2/DVL1/PSMA7/PSMD10/PSMD3/DAAM1/AP2B1/FOXF2/PSMC5/PSMC6/RHOA/PSME3/PSMB4/PSMA1/PSME2/WDR1/PSMB6/PSMA2/NPHP1/PSMD14/PSMD11/RPGRIP1L/PSMA6/PSMA3/PSMB5/PSMB3/PSMC2/PSMB7/PSMC1/AP2S1/PFN1/PSMB1/PSMB9/PSMA5/PSMB2/PSMA4/CDC42
GO:0007164	GO:0007164	establishment of tissue polarity	102	-0.424913669521652	-1.54008389447304	0.0123181711414446	0.0851913879976233	0.068640234643959	2486	tags=38%, list=18%, signal=32%	SMURF2/RAC1/FZD2/DVL1/PSMA7/PSMD10/PSMD3/DAAM1/AP2B1/FOXF2/PSMC5/PSMC6/RHOA/PSME3/PSMB4/PSMA1/PSME2/WDR1/PSMB6/PSMA2/NPHP1/PSMD14/PSMD11/RPGRIP1L/PSMA6/PSMA3/PSMB5/PSMB3/PSMC2/PSMB7/PSMC1/AP2S1/PFN1/PSMB1/PSMB9/PSMA5/PSMB2/PSMA4/CDC42
GO:0003073	GO:0003073	regulation of systemic arterial blood pressure	45	0.498784039437481	1.64441897258495	0.012380069871579	0.0855088546943942	0.0688960232755353	1608	tags=29%, list=11%, signal=26%	AGT/SUCNR1/RARRES2/SOD2/REN/ATP6AP2/ADM/GAS6/PRCP/MME/ECE1/MECP2/F2R
GO:0019359	GO:0019359	nicotinamide nucleotide biosynthetic process	23	0.591975023268081	1.66606341878477	0.0124589301553994	0.0858317533643881	0.0691561885457058	2684	tags=43%, list=19%, signal=35%	NNMT/QPRT/NAXD/NMRK1/NADSYN1/NMNAT3/NADK/NAMPT/PARP9/PTGS2
GO:0019363	GO:0019363	pyridine nucleotide biosynthetic process	23	0.591975023268081	1.66606341878477	0.0124589301553994	0.0858317533643881	0.0691561885457058	2684	tags=43%, list=19%, signal=35%	NNMT/QPRT/NAXD/NMRK1/NADSYN1/NMNAT3/NADK/NAMPT/PARP9/PTGS2
GO:1904814	GO:1904814	regulation of protein localization to chromosome, telomeric region	14	-0.708484044944409	-1.73538494392642	0.0125012573001061	0.0860125116169465	0.0693018287232058	3274	tags=79%, list=23%, signal=60%	CCT7/CCT4/TCP1/CCT6A/CCT8/GNL3L/GNL3/CCT3/DKC1/CCT5/CCT2
GO:0022904	GO:0022904	respiratory electron transport chain	111	-0.421367810643527	-1.5307670886108	0.0125175659980507	0.0860140203413613	0.0693030443296219	2605	tags=34%, list=19%, signal=28%	SDHAF2/NDUFB1/COX7C/NDUFA4/COX2/IMMP2L/COX10/NDUFA1/NDUFAF1/NDUFB2/COX15/NDUFA6/COX6B1/NDUFS5/NDUFS1/SDHD/COX6C/UQCRQ/NDUFB7/UQCRH/CYC1/ETFRF1/UQCR10/UQCRC2/SLC25A12/NDUFA12/NDUFS4/UQCRHL/NDUFB9/DLD/COX7B/DNAJC15/NDUFB3/PARK7/NDUFA9/CYCS/CCNB1/CDK1
GO:1902001	GO:1902001	fatty acid transmembrane transport	35	0.527295815347926	1.63582352899348	0.0125357919805283	0.0860286828342801	0.0693148581640723	1734	tags=26%, list=12%, signal=23%	CD36/SLC1A2/SLC2A1/SLC1A1/SLC27A1/SLC7A11/ACACB/AKT2/PRKAA2
GO:1903169	GO:1903169	regulation of calcium ion transmembrane transport	88	0.412335303383401	1.51382043680704	0.0126232015316698	0.0865174812670597	0.0697086918590994	2965	tags=38%, list=21%, signal=30%	PDE4B/TMC1/PRNP/TMEM38B/FYN/GEM/TSPAN13/CACNA1C/SLC9A1/NOS1AP/PLCG2/GNB5/GPER1/CEMIP/PSEN2/STAC/AKAP6/CDK5/EHD3/FMR1/F2R/TRPC1/CACNB4/PLCG1/STIM2/GSTO1/PKD2/JSRP1/PRKCE/CACNA2D1/PDPK1/PDE4D/THY1
GO:0044783	GO:0044783	G1 DNA damage checkpoint	57	-0.484501328220386	-1.58386121133917	0.0126625203692477	0.0866758436542872	0.0698362872848058	2166	tags=35%, list=15%, signal=30%	TRIAP1/CNOT6/CHEK2/MDM4/CNOT9/CNOT2/PCBP4/TP53/PRMT1/RPL26/TFDP1/PCNA/CDK2/CASP2/E2F7/AURKA/CCNB1/GTSE1/CDC25C/CDK1
GO:0006638	GO:0006638	neutral lipid metabolic process	85	0.41831114965828	1.53374109734268	0.0127536064625318	0.0869951365672077	0.0700935473316033	2335	tags=32%, list=17%, signal=27%	LIPG/FABP3/PLA2G4A/APOB/DGKI/FABP4/GK/PCSK9/ABHD16A/GPLD1/PGS1/GPX1/SLC27A1/GPAT4/PLA2G15/SLC22A4/DGKE/FBXW7/LPIN2/GPAM/ABHD6/DGKA/LMF1/LDLR/CYP2E1/ACSL4/AVIL
GO:0006639	GO:0006639	acylglycerol metabolic process	85	0.41831114965828	1.53374109734268	0.0127536064625318	0.0869951365672077	0.0700935473316033	2335	tags=32%, list=17%, signal=27%	LIPG/FABP3/PLA2G4A/APOB/DGKI/FABP4/GK/PCSK9/ABHD16A/GPLD1/PGS1/GPX1/SLC27A1/GPAT4/PLA2G15/SLC22A4/DGKE/FBXW7/LPIN2/GPAM/ABHD6/DGKA/LMF1/LDLR/CYP2E1/ACSL4/AVIL
GO:0060562	GO:0060562	epithelial tube morphogenesis	221	0.319467576605916	1.33521860265313	0.0127579848613339	0.0869951365672077	0.0700935473316033	1413	tags=14%, list=10%, signal=13%	AGT/LRP2/CSF1/KLHL3/RDH10/CTSH/NFATC4/LAMA1/SPRY1/WNT2/WNT2B/BMP2/NOG/TSC2/DEAF1/LMO4/TGFBR2/SMO/TGFB1/PTK7/KIF26B/FZD3/ADM/PML/SFRP1/DDR1/BMP4/CELSR1/GREM1/TCTN1/SOX4/DLL4
GO:0072006	GO:0072006	nephron development	92	0.402698741334189	1.4916387777489	0.0127911376939536	0.0871100918622625	0.0701861688818749	2760	tags=33%, list=20%, signal=26%	AGT/SULF2/KLHL3/ANGPT1/WNT2B/LAMB2/BMP2/NOG/ITGA3/STAT1/SMO/AQP11/ANGPT2/KIF26B/BMP4/GREM1/HOXA11/CTNNBIP1/YAP1/PDGFRA/VEGFA/HEYL/TEK/PKD2/MPV17/LIF/AHI1/HOXD11/GZF1/PDGFD
GO:0051782	GO:0051782	negative regulation of cell division	11	-0.753947299093322	-1.73937004002043	0.0128312189054478	0.0872718782042286	0.070316523049541	1656	tags=45%, list=12%, signal=40%	SUSD2/BLM/ORC6/E2F7/AURKB
GO:0071900	GO:0071900	regulation of protein serine/threonine kinase activity	373	-0.313281778433058	-1.31796135888805	0.0128809890291235	0.0874834235404758	0.0704869689344964	879	tags=10%, list=6%, signal=10%	UBE2N/UBA52/LPAR1/CALM2/ACTB/FERMT2/HSP90AB1/PPIA/CAV1/RPS27A/RPS3/FLT1/EPHA4/FGF1/PTPRC/CKS2/MYOCD/CCNF/CDKN2C/CKS1B/MAP3K12/PSRC1/CXCL10/EZH2/EGF/CDKN3/CCNA2/CCNB1/CDC6/CCNE2/PLK1/CDC25C/HGF/CCNB2/CDK1/PBK/IQGAP3
GO:0006958	GO:0006958	complement activation, classical pathway	15	0.678362181045058	1.71899740830621	0.0128950500841554	0.0874834235404758	0.0704869689344964	1570	tags=53%, list=11%, signal=47%	C1S/SERPING1/C2/CD55/C1RL/C1R/CD46/C4B
GO:0072001	GO:0072001	renal system development	217	0.333884084248608	1.3926181015444	0.0129339542955906	0.0876361465959788	0.0706100206491317	1927	tags=21%, list=14%, signal=18%	AGT/LRP2/SULF2/KLHL3/AKR1B1/RDH10/CTSH/CYP26B1/REN/ANGPT1/SPRY1/LRRK2/WNT2B/LAMB2/BMP2/PCSK9/NOG/TIPARP/ITGA3/WFS1/STAT1/SMO/PTK7/AQP11/ANGPT2/KIF26B/ZNF354A/SFRP1/SDC1/IFT27/BMP4/MME/HYAL2/GREM1/SOX4/EMX2/GCNT4/TGFBR1/SMAD7/HOXA11/CTNNBIP1/YAP1/PDGFRA/NPHP3/VEGFA
GO:2001185	GO:2001185	regulation of CD8-positive, alpha-beta T cell activation	12	0.70690988330009	1.69477631161764	0.0130263101067106	0.0881501947221201	0.071024198476562	2656	tags=58%, list=19%, signal=47%	HLA-E/PTPN22/RUNX1/IRF1/HFE/SH3RF1/RUNX3
GO:0099504	GO:0099504	synaptic vesicle cycle	112	0.380295511317476	1.45031821355766	0.0130429425064337	0.0881511638930402	0.0710249793550161	2595	tags=26%, list=19%, signal=21%	MX1/LRRK2/ATP2A2/MX2/SYT7/STON1/TOR1A/ITSN2/RAB3B/PLD2/BTBD8/SNAP25/CDK5/KIAA1109/OPHN1/CADPS/FMR1/VAMP4/CDK5R1/VPS18/FCHO2/DENND1A/CYFIP1/CLCN3/NAPA/STXBP1/GAK/SYNJ1/NLGN2
GO:0007006	GO:0007006	mitochondrial membrane organization	128	-0.386210562350596	-1.43004105682532	0.0132436276364968	0.0893137608315868	0.0719617046336372	2833	tags=35%, list=20%, signal=28%	TIMM9/ROMO1/YWHAG/ALKBH7/IMMT/HSP90AA1/PDCD5/MICOS10/ATP5PD/OMA1/HSPA4/ATP5PF/MAIP1/ATP5MF/ATF2/TMEM14A/BCS1L/ATP5F1D/PPIF/PMAIP1/YWHAZ/ATP5MC3/YWHAE/CALM3/ATP5F1E/TP53/YWHAH/DYNLT1/ATP5MC2/TIMM8B/AGK/ATP5F1C/MAPK8/TFDP1/SLC25A5/ATP5PB/ATP5ME/STPG1/ATP5F1A/ATP5MG/APOO/TIMM10/DNAJC11/ATP5MC1/ATP5PO
GO:1901652	GO:1901652	response to peptide	369	0.292065252956639	1.28841498614447	0.0132488657582317	0.0893137608315868	0.0719617046336372	1745	tags=18%, list=12%, signal=16%	CD36/PDK4/ACVR1C/EREG/RARRES2/MMP2/AKR1B1/GDF15/HDAC9/FABP3/ADCY4/LGMN/MMP3/KLF5/PRNP/KLF11/BSG/ANO1/INSR/PTPN22/PIK3R1/PCSK9/AGTRAP/TSC2/KLF10/FYN/CCN2/STAT2/STAT1/MDM2/ITGA4/OSBPL8/SLC9A1/ATP6AP1/ATP6V1A/MMP12/ADM/GPER1/SLC2A1/GPLD1/TLR4/STAT4/TIMP1/ZNF106/SOS1/SORT1/SLC27A1/PTPRE/ATP6V0A1/PIK3R3/PTPRA/ERRFI1/GGH/CDK5/JAK3/KANK1/TGFBR3/ADCY6/BAIAP2L1/CYTB/ICAM1/LRP1/PIP4K2B/NFE2L2/AKT2/BTG2
GO:0001990	GO:0001990	regulation of systemic arterial blood pressure by hormone	17	0.658513185946727	1.73285748621186	0.0132650815750617	0.0893137608315868	0.0719617046336372	1608	tags=41%, list=11%, signal=36%	AGT/SUCNR1/REN/ATP6AP2/MME/ECE1/F2R
GO:0043491	GO:0043491	protein kinase B signaling	174	0.343028316184875	1.38880717978169	0.0132858932734329	0.0893372097429161	0.0719805978435451	1676	tags=20%, list=12%, signal=18%	CHI3L1/LRP2/EREG/GDF15/PLK3/FGF5/CCL2/XDH/ANGPT1/KITLG/INSR/PIK3R1/TSC2/FYN/SEMA5A/LOX/OSBPL8/TGFB1/PINK1/F10/GPER1/P2RX4/C1QTNF1/FGF7/GAS6/GPX1/HYAL2/PLEKHA1/PIK3R3/TGFBR1/FGF9/MYDGF/HIP1/AKR1C2/GCNT2
GO:0006303	GO:0006303	double-strand break repair via nonhomologous end joining	86	-0.428971221955319	-1.49425089203074	0.0133019863365809	0.0893372097429161	0.0719805978435451	2390	tags=29%, list=17%, signal=24%	XRCC6/BRCC3/POLA1/NBN/ERCC8/SHLD2/XRCC4/XRCC5/PIAS4/MLH1/SUMO1/PSMD14/HMGB1/DCLRE1C/UBE2N/UBE2V2/NHEJ1/AUNIP/LIG3/SHLD1/BRCA1/H4C3/HMGB2/POLQ/BARD1
GO:0009100	GO:0009100	glycoprotein metabolic process	309	0.302148328459896	1.3043838502866	0.0135600969108232	0.0909564342349574	0.0732852361607194	2431	tags=22%, list=17%, signal=18%	PCSK6/SULF2/ALG12/MUC19/ST6GALNAC2/GALNT15/FBXO6/HEXA/MANBA/BMP2/MAN2A2/MUC1/GNPTAB/CSGALNACT1/CST3/GALNT5/NPC1/IDS/CTSL/MAN2B1/TMTC1/MAN1C1/HEXB/AQP11/BMPR1B/MMP12/OS9/EDEM2/B4GAT1/ITM2B/SGSH/MAN1B1/PORCN/ST3GAL3/COG7/TMEM59/RNF103/GCNT4/MAN1A2/ST3GAL6/B3GNT9/MGAT4B/ACOT8/JAK3/POMT2/ITM2C/BACE2/GCNT2/SLC35C1/AMFR/PLOD3/UGGT2/CHST15/ENTPD5/ARSB/CHST3/ST6GAL1/HS6ST3/NDST2/ABCA7/GFPT1/GALNT11/FBXO4…
GO:0060541	GO:0060541	respiratory system development	139	0.368336574765535	1.44075061458518	0.0136206019647606	0.0912477921097875	0.0735199884445331	1927	tags=25%, list=14%, signal=22%	CHI3L1/RDH10/CTSH/LAMA1/SPRY1/WNT2/WNT2B/TMEM38B/EPAS1/NOG/GATA6/CCN2/TGFBR2/ITGA3/LOX/PTK7/MMP12/FGF7/THRA/BMP4/MME/CELSR1/SPEF2/ERRFI1/SLC7A11/MAN1A2/FGF9/HSD11B1/HEG1/FBXW7/YAP1/PDGFRA/PLOD3/NPHP3/VEGFA
GO:0007566	GO:0007566	embryo implantation	35	0.525243982478806	1.62945815231653	0.013781569676848	0.0922106026188103	0.0742957422009908	1441	tags=29%, list=10%, signal=26%	STC1/ACVR1C/MMP2/BSG/IGFBP7/TGFBR2/SPP1/TIMP1/DDR1/RECK
GO:0071453	GO:0071453	cellular response to oxygen levels	187	-0.365392088847422	-1.43037674740075	0.0138718574351779	0.092698687310576	0.0746890008220365	2048	tags=29%, list=15%, signal=25%	HIGD1A/PSMD10/UBB/PSMD3/SLC8A1/TSC1/SUV39H1/MDM4/PSMC5/CREBBP/PSMC6/PSME3/PMAIP1/PSMB4/PSMA1/PSME2/TWIST1/PSMB6/PSMA2/EIF4EBP1/ANKRD1/TP53/PRKAA1/PGK1/CITED2/PTN/PSMD14/PSMD11/PSMA6/PSMA3/PSMB5/PSMB3/PSMC2/PSMB7/HIF3A/ENO1/PSMC1/UBA52/LPAR1/RBX1/PSMB1/PSMB9/PSMA5/PSMB2/CAV1/EEF2K/RPS27A/PSMA4/SCN2A/LMNA/SUV39H2/BRIP1/CCNA2/CCNB1
GO:0035929	GO:0035929	steroid hormone secretion	11	0.716205370427993	1.68250902385949	0.0139015849734937	0.0927771470899381	0.0747522172784426	1074	tags=36%, list=8%, signal=34%	AGT/REN/C1QTNF1/SELENOM
GO:1905146	GO:1905146	lysosomal protein catabolic process	13	0.701330659011307	1.70954832387727	0.0139183075133053	0.0927771470899381	0.0747522172784426	2489	tags=54%, list=18%, signal=44%	LRP2/TPP1/LRP1/LDLR/LAMP2/CLN3/VPS13A
GO:0000726	GO:0000726	non-recombinational repair	92	-0.421097194982146	-1.49408793024618	0.0139833999245326	0.0929791741250636	0.0749149940968673	2414	tags=29%, list=17%, signal=24%	RBBP8/XRCC6/BRCC3/POLA1/NBN/ERCC8/SHLD2/XRCC4/XRCC5/PIAS4/MLH1/SUMO1/PSMD14/HMGB1/DCLRE1C/UBE2N/UBE2V2/OGG1/NHEJ1/AUNIP/LIG3/SHLD1/BRCA1/H4C3/HMGB2/POLQ/BARD1
GO:0008033	GO:0008033	tRNA processing	124	-0.386342062156282	-1.42424895790963	0.0139833999245326	0.0929791741250636	0.0749149940968673	3053	tags=33%, list=22%, signal=26%	PUSL1/ADAT1/ELAC1/QTRT2/METTL1/SSB/NAT10/LSM6/ELP4/OSGEPL1/POLR3K/FARS2/RPP14/METTL2A/CDKAL1/METTL6/TYW3/RTCB/PRORP/TRMU/TPRKB/ZBTB8OS/PUS7/TSEN15/MTO1/NSUN3/KARS1/PTCD1/ALKBH8/ELP3/TRMT10A/POP5/HSD17B10/METTL2B/DDX1/TRDMT1/TRMT1/THG1L/WDR4/RPP30/POP1
GO:0050879	GO:0050879	multicellular organismal movement	28	0.563263373301701	1.65811087150129	0.0143086052827476	0.0949054638232865	0.0764670403774368	2460	tags=29%, list=18%, signal=24%	MYH3/KCNJ2/ATP2A2/HIPK2/STAC/GAA/GSTO1/JSRP1
GO:0050881	GO:0050881	musculoskeletal movement	28	0.563263373301701	1.65811087150129	0.0143086052827476	0.0949054638232865	0.0764670403774368	2460	tags=29%, list=18%, signal=24%	MYH3/KCNJ2/ATP2A2/HIPK2/STAC/GAA/GSTO1/JSRP1
GO:0110110	GO:0110110	positive regulation of animal organ morphogenesis	18	0.641259425274414	1.70664125369304	0.0143796832539591	0.0952587195485319	0.076751664873411	1710	tags=44%, list=12%, signal=39%	CSF1/SPRY1/WNT2/WNT2B/DKK1/BMP2/BMP4/HOXA11
GO:0075733	GO:0075733	intracellular transport of virus	50	-0.500717138441131	-1.59384379927219	0.0144015950624625	0.0952858009949562	0.0767734848822259	2287	tags=36%, list=16%, signal=30%	XPO1/NUP93/RAE1/UBB/NUP88/NUP85/SEH1L/NDC1/KPNA1/KPNB1/NUP155/DYNLT1/NUP35/NUP37/UBA52/RAN/RPS27A/KPNA2
GO:0061351	GO:0061351	neural precursor cell proliferation	90	-0.42884798719274	-1.50989185642872	0.0144649309506037	0.0955865523633218	0.0770158056728519	1448	tags=18%, list=10%, signal=16%	EML1/PAFAH1B1/TP53/PTN/FLNA/TRNP1/NF2/RRM1/TOX/EPHB1/RACGAP1/EGF/MELK/ADCYAP1/SHCBP1/KIF14
GO:0071428	GO:0071428	rRNA-containing ribonucleoprotein complex export from nucleus	15	-0.673093297086633	-1.66282607725807	0.0145293255806418	0.0956140506144959	0.0770379615087556	2287	tags=60%, list=16%, signal=50%	NMD3/XPO1/NUP88/TSC1/RIOK2/ABCE1/EIF6/RAN/NPM1
GO:0061008	GO:0061008	hepaticobiliary system development	105	-0.411271137616974	-1.49408364737049	0.0145341640916848	0.0956140506144959	0.0770379615087556	1715	tags=23%, list=12%, signal=20%	TAF10/KRT18/PKM/ZMPSTE24/CPS1/PRMT5/CITED2/PTN/RPGRIP1L/MPST/HES1/RPL30/ANXA1/PCNA/HNRNPD/FGF1/GNPNAT1/DDX39B/ASNS/EZH2/TYMS/E2F7/AURKA/HGF
GO:0071805	GO:0071805	potassium ion transmembrane transport	98	0.395428890652114	1.48144428303191	0.0145382925298109	0.0956140506144959	0.0770379615087556	2345	tags=31%, list=17%, signal=26%	KCNH6/KCNJ2/RGS4/AMIGO1/TMEM38B/KCNT2/SLC12A7/KCNMB3/KCNQ3/SLC9A1/KCNJ14/NOS1AP/SLC9A7/KCND2/KCNC4/KLHL24/KCNMB2/SNAP25/AKAP6/ATP1B3/KCNJ3/KCNK1/SLC12A6/KCNS3/CCDC51/SLC12A8/TMEM175/SLC24A1/SLC12A4/PKD2
GO:0006817	GO:0006817	phosphate ion transport	16	0.646640468441921	1.67544128314105	0.014540632837558	0.0956140506144959	0.0770379615087556	2971	tags=50%, list=21%, signal=39%	SFRP4/CRY2/ANKH/CEBPB/SLC25A30/IP6K2/SLC20A2/XPR1
GO:0090342	GO:0090342	regulation of cell aging	43	-0.524543461328906	-1.6149272944988	0.014592525300033	0.0958373958894062	0.0772179148166755	1905	tags=30%, list=14%, signal=26%	PNPT1/CDK6/TWIST1/CGAS/ZMPSTE24/TP53/ARG2/BCL2L12/EEF1E1/LMNA/RBL1/FBXO5/FOXM1
GO:0050849	GO:0050849	negative regulation of calcium-mediated signaling	14	0.675771842304671	1.67262933990629	0.0146241205750267	0.0959270534896842	0.0772901535589398	2283	tags=36%, list=16%, signal=30%	MYOZ2/PRNP/FHL2/MAPK7/DYRK2
GO:0007032	GO:0007032	endosome organization	69	0.426450213330269	1.50749278787449	0.0146470884184686	0.0959599689768786	0.0773166741594083	3601	tags=41%, list=26%, signal=30%	ALS2CL/SQSTM1/FHIP1B/PRKN/SCARB2/AQP11/PHETA1/PI4K2A/CHMP2B/TMEM127/PHETA2/VPS18/HOOK3/PLEKHJ1/SNX33/CHMP1B/TMCC1/EXOC8/CLCN3/SYNJ1/VPS11/VPS37A/STX6/HOOK2/DNAJC13/USP50/WASHC4/RAB22A
GO:0046599	GO:0046599	regulation of centriole replication	19	-0.66906127756969	-1.73930880011856	0.0147852236828449	0.0966500993812436	0.0778727246476557	510	tags=26%, list=4%, signal=25%	NPM1/STIL/RBM14/BRCA1/PLK4
GO:1990173	GO:1990173	protein localization to nucleoplasm	14	-0.700222458572606	-1.71514873295613	0.0147885861006093	0.0966500993812436	0.0778727246476557	3274	tags=71%, list=23%, signal=55%	CCT7/CCT4/LARP7/TCP1/CCT6A/CCT8/CCT3/DKC1/CCT5/CCT2
GO:0048143	GO:0048143	astrocyte activation	11	0.713453808210032	1.67604505632645	0.0149313227310943	0.0974160244793077	0.0784898442848223	2642	tags=73%, list=19%, signal=59%	GRN/SMO/BACE2/LRP1/IL6/LDLR/IFNGR1/APP
GO:0042391	GO:0042391	regulation of membrane potential	250	0.318504998084228	1.34378159800378	0.0149422259769982	0.0974160244793077	0.0784898442848223	1869	tags=20%, list=13%, signal=18%	KCNH6/CD36/FGF13/KCNJ2/RGS4/IFI6/SOD2/BCL2L1/CACNA1E/LRRK2/ATP2A2/TRPV1/GLRB/USP53/GRIA1/PRKN/GABRE/CACNA1C/KCNMB3/RTL10/KCNQ3/SLC9A1/CTNS/NOS1AP/GNA14/PINK1/GPER1/P2RX4/KCND2/INSYN2A/KCTD7/POPDC3/KCNMB2/P2RX7/MECP2/DSP/AKAP6/CDK5/EHD3/FMR1/SLMAP/CACNB4/SMAD7/ATP1B3/AKT2/S1PR2/KCNJ3/POPDC2/SLC25A36/CELF4
GO:0043038	GO:0043038	amino acid activation	48	-0.493973910979934	-1.55113488984197	0.0150468534601107	0.0979786584625481	0.0789431686117997	2927	tags=58%, list=21%, signal=46%	SARS2/QRSL1/GATC/GATB/NARS1/AARSD1/DARS1/MARS1/FARS2/GARS1/PPA2/EPRS1/YARS2/LARS1/IARS1/AIMP1/QARS1/KARS1/TARS1/RARS1/WARS2/AIMP2/EARS2/VARS1/WARS1/EEF1E1/DARS2/FARSB
GO:0002717	GO:0002717	positive regulation of natural killer cell mediated immunity	14	0.674183223878368	1.66869728825305	0.0150883741056138	0.0981294987452694	0.0790647033425172	2362	tags=50%, list=17%, signal=42%	HLA-E/KLRD1/RAET1G/LAMP1/CADM1/RAET1E/STAT5B
GO:0033209	GO:0033209	tumor necrosis factor-mediated signaling pathway	132	-0.385184758611044	-1.43032223294041	0.0151243541854107	0.0982439823514041	0.0791569448445362	2265	tags=32%, list=16%, signal=27%	TRAF5/PSMA7/PSMD10/PSMD3/PSMC5/PSMC6/PSME3/TNFRSF19/KRT18/PSMB4/PSMA1/PSME2/PYCARD/PSMB6/LIMS1/GSTP1/PSMA2/CASP1/PTPN2/PIAS4/TP53/PSMD14/PSMD11/TNFSF4/PSMA6/PSMA3/PSMB5/PSMB3/PSMC2/PSMB7/PSMC1/KRT8/TNFSF18/RACK1/PSMB1/PSMB9/PSMA5/PSMB2/CASP4/PSMA4/ACTN4/TRAIP
GO:0043968	GO:0043968	histone H2A acetylation	16	-0.679971213835263	-1.69585507136811	0.0151670341701131	0.0984016561570686	0.0792839854676836	2610	tags=50%, list=19%, signal=41%	YEATS4/ING3/BRD8/RUVBL2/MORF4L1/MSL3/ACTL6A/MORF4L2
GO:0006936	GO:0006936	muscle contraction	202	0.328290017513228	1.35163016862405	0.0152620733263839	0.0988982351549677	0.0796840881040675	1814	tags=20%, list=13%, signal=18%	FGF13/SULF2/PDE4B/MYH3/STC1/KCNJ2/RGS2/MYL3/ATP2A2/PTGER3/TMEM38B/TNNT2/TMOD1/ACTC1/GSN/ITGB5/TNNI3K/CCN2/CACNA1C/ARHGEF11/SLC9A1/NOS1AP/SLC6A8/GPER1/P2RX4/CHRM3/SSPN/BBS2/STAC/DYSF/DSP/CALD1/MKKS/EHD3/F2R/SLMAP/SMAD7/CRYAB/UTRN/GAA/KCNJ3
GO:0017144	GO:0017144	drug metabolic process	20	0.613548014321222	1.70065623033352	0.0152940269269914	0.0989089927955253	0.0796927557286883	2275	tags=40%, list=16%, signal=34%	FMO2/FMO1/CYP2U1/CBR1/AOX1/FMO5/VKORC1/CYP2E1
GO:0030048	GO:0030048	actin filament-based movement	94	0.395353244955886	1.47004061008121	0.0153007364462962	0.0989089927955253	0.0796927557286883	829	tags=17%, list=6%, signal=16%	FGF13/PDE4B/MYH3/STC1/KCNJ2/MYL3/ATP2A2/TNNT2/TMOD1/ACTC1/GSN/CACNA1C/SLC9A1/MYO1D/NOS1AP/EPDR1
GO:0030574	GO:0030574	collagen catabolic process	30	0.548469771160155	1.63913966045904	0.0153203390207108	0.0989161019380676	0.07969848369279	1235	tags=37%, list=9%, signal=34%	CTSK/MMP11/MMP2/MMP3/CTSS/CST3/CTSD/CTSL/FAP/MMP12/CTSB
GO:0032680	GO:0032680	regulation of tumor necrosis factor production	77	0.405493172162876	1.45772880687555	0.0153585196432049	0.0990429988088942	0.0798007267855937	1094	tags=17%, list=8%, signal=16%	CD36/CD14/NFATC4/ANGPT1/HLA-E/IFIH1/PTPN22/PIK3R1/DDX58/LY96/CD47/TLR4/GAS6
GO:0071158	GO:0071158	positive regulation of cell cycle arrest	67	-0.465535406572295	-1.55659052833206	0.0154133573826752	0.0992768777925082	0.0799891672922093	2166	tags=33%, list=15%, signal=28%	TRIAP1/CNOT6/CHEK2/MDM4/CNOT9/CNOT2/PCBP4/TP53/PRMT1/RPL26/TFDP1/RPL23/PCNA/CDK2/CASP2/BRCA1/E2F7/AURKA/CCNB1/GTSE1/CDC25C/CDK1
GO:0000387	GO:0000387	spliceosomal snRNP assembly	39	-0.549376767489627	-1.68285330104026	0.0154623285806154	0.0994724531792659	0.0801467459014228	2102	tags=33%, list=15%, signal=28%	PRPF3/SRSF10/GEMIN6/PRMT5/SNRPD3/WDR77/LSM2/SNRPF/SNRPG/SNRPD2/SNRPD1/GEMIN2/SNRPE
